# Supplementary material for: Visible-light-induced selectivity controllable synthesis of diamine or imidazoline derivatives by multicomponent decarboxylative radical coupling reactions
Source: Royal Society of Chemistry journal article supplement (doi:10.1039/d0qo01028f), 2020-01-01

# Visible-Light-Induced Selectivity Controllable Synthesis of Diamine or Imidazoline Derivatives by Multicomponent Decarboxylative Radical Coupling Reactions

Shulei Pan,<sup>‡</sup> Min Jiang,<sup>‡</sup> Guofu Zhong,<sup>\*</sup> Linlong Dai, Yu Zhou, Kaihang Wei, Xiaofei Zeng<sup>\*</sup>

College of Materials, Chemistry and Chemical Engineering, Hangzhou Normal University, Hangzhou  
311121, China

## Contents

|     |                                                                 |     |
|-----|-----------------------------------------------------------------|-----|
| I   | General information.....                                        | S2  |
| II  | General Procedure.....                                          | S3  |
| III | Optimization of reaction conditions.....                        | S5  |
| IV  | Gram-scale reactions and synthetic utility of the reaction..... | S7  |
| V   | Characterization of products.....                               | S9  |
| VI  | References.....                                                 | S41 |
| VII | NMR of all the products.....                                    | S42 |

---

## I General information:

Analytical thin layer chromatography (TLC) was performed using Merck 60 F254 precoated silica gel plate (0.2 mm thickness). Subsequent to elution, plates were visualized using UV radiation (254 nm) on Spectroline Model ENF-24061/F 254 nm. Further visualization was possible by staining with basic solution of potassium permanganate or acidic solution of ceric molybdate.

Flash column chromatography was performed using Merck aluminium oxide90 active neutral with freshly distilled solvents. Columns were typically packed as slurry and equilibrated with the appropriate solvent system prior to use.

Proton nuclear magnetic resonance spectra ( $^1\text{H}$  NMR) were recorded on Bruker AMX 500 spectrophotometer ( $\text{CDCl}_3$  as solvent). Chemical shifts for  $^1\text{H}$  NMR spectra are reported as  $\delta$  in units of parts per million (ppm) downfield from  $\text{SiMe}_4$  (0.0) and relative to the signal of chloroform-d (7.26, singlet). Multiplicities were given as: s (singlet), d (doublet), t (triplet), dd (doublets of doublet) or m (multiplets). The number of protons (n) for a given resonance is indicated by nH. Coupling constants are reported as a  $J$  value in Hz. Carbon nuclear magnetic resonance spectra ( $^{13}\text{C}$  NMR) are reported as  $\delta$  in units of parts per million (ppm) downfield from  $\text{SiMe}_4$  (0.0) and relative to the signal of chloroform-d (77.0, triplet).

Two Blue LEDs ( 10 W,  $\lambda_{\text{max}} = 455 \text{ nm}$ ) were used for irradiation (for emission spectra, see Figure 1). The light source was placed in 3.0 cm distance from the reaction vessel.

The starting materials **1a-1ax**, **2a**, **2ab-2ai** were all commercial available.

The starting materials **2y-2aa** were prepared according to the literatures reported.<sup>1</sup>

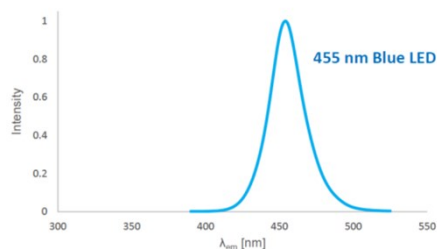

**Supplementary Fig. 1.** Emission spectra of the used light sources.

## II General Procedure

**Scheme 1** The general procedure A1 for the production of diamine products.

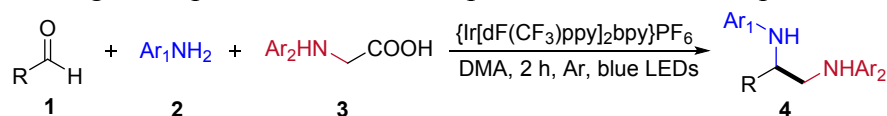

**2** (0.2 mmol, 1.0 equiv), **3** (0.6 mmol, 3.0 equiv), {Ir[dF(CF<sub>3</sub>)ppy]<sub>2</sub>bpy}PF<sub>6</sub> (0.002 mmol, 1.0 mol%) were added into a 10 mL Schlenk tube. Subsequently, DMA (2 mL) and **1** (0.2 mmol, 1.0 equiv) was added, degassed three times by freeze-pump-thaw method. The reaction mixture was stirred under an argon atmosphere irradiated by blue LEDs ( $\lambda_{\text{max}} = 455 \text{ nm}$ ) from a 3.0 cm distance for 2 h at room temperature. The mixture was quenched with water (10 mL) and then extracted with ethyl acetate (5 mL  $\times$  2). The organic layer was dried over Na<sub>2</sub>SO<sub>4</sub> and evaporated in vacuum. The residue was purified by silica gel column chromatography (PE / EtOAc = 20:1) to afford the desired product **4**.

**Scheme 2** The general procedure A2 for the production of **4x**, **4ai**, **4aj**.

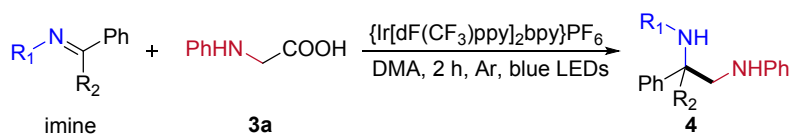

The starting imines were prepared according to the literature reported.<sup>2</sup>

Corresponding imine (0.2 mmol, 1.0 equiv), **3a** (0.6 mmol, 3.0 equiv), {Ir[dF(CF<sub>3</sub>)ppy]<sub>2</sub>bpy}PF<sub>6</sub> (0.002 mmol, 1.0 mol%) were added into a 10 mL Schlenk tube. Subsequently, DMA (2 mL) was added, degassed three times by freeze-pump-thaw method. The reaction mixture was stirred under an argon atmosphere irradiated by blue LEDs ( $\lambda_{\text{max}} = 455 \text{ nm}$ ) from a 3.0 cm distance for 2 h at room temperature. The mixture was quenched with water (10 mL) and then extracted with ethyl acetate (5 mL  $\times$  2). The organic layer was dried over Na<sub>2</sub>SO<sub>4</sub> and evaporated in vacuum. The residue was purified by silica gel column chromatography (PE / EtOAc = 20:1) to afford the desired products **4x**, **4ai**, **4aj**.

**Scheme 3** The general procedure B1 for the production of imidazoline products.

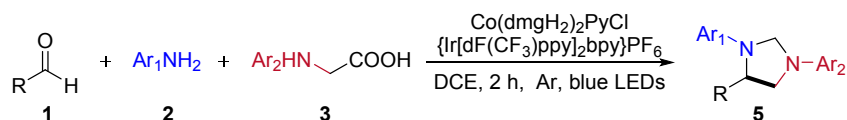

**2** (0.2 mmol, 1.0 equiv), **3** (0.6 mmol, 3.0 equiv), {Ir[dF(CF<sub>3</sub>)ppy]<sub>2</sub>bpy}PF<sub>6</sub> (0.002 mmol, 1.0 mol%), Co(dmgH<sub>2</sub>)<sub>2</sub>PyCl (0.03 mmol, 15 mol%) were added into a 10 mL Schlenk tube. Subsequently, DCE (2 mL) and **1** (0.2 mmol, 1.0 equiv) was added, degassed three times by freeze-pump-thaw method. The reaction mixture was stirred under an argon atmosphere irradiated by blue LEDs (λ max = 455 nm) from a 3.0 cm distance for 2 h at room temperature. The mixture was quenched with water (10 mL) and then extracted with ethyl acetate (5 mL × 2). The organic layer was dried over Na<sub>2</sub>SO<sub>4</sub> and evaporated in vacuum. The residue was purified by silica gel column chromatography (PE / EtOAc = 50:1 ) to afford the desired product **5**.

**Scheme 4** The general procedure B2 for the production of **5ab**, **5ac**.

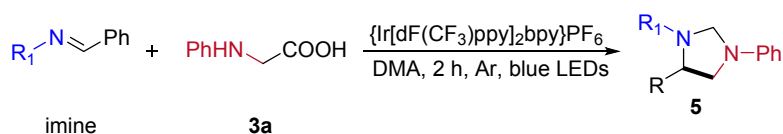

The starting imines were prepared according to the literature reported.<sup>2</sup>

Corresponding imine (0.2 mmol, 1.0 equiv), **3a** (0.6 mmol, 3.0 equiv), {Ir[dF(CF<sub>3</sub>)ppy]<sub>2</sub>bpy}PF<sub>6</sub> (0.002 mmol, 1.0 mol%), Co(dmgH<sub>2</sub>)<sub>2</sub>PyCl (0.03 mmol, 15 mol%) were added into a 10 mL Schlenk tube. Subsequently, DCE (2 mL) was added, degassed three times by freeze-pump-thaw method. The reaction mixture was stirred under an argon atmosphere irradiated by blue LEDs (λ max = 455 nm) from a 3.0 cm distance for 2 h at room temperature. The mixture was quenched with water (10 mL) and then extracted with ethyl acetate (5 mL × 2). The organic layer was dried over Na<sub>2</sub>SO<sub>4</sub> and evaporated in vacuum. The residue was purified by silica gel column chromatography (PE / EtOAc = 50:1 ) to afford the desired product **5ab**, **5ac**.

**Scheme 5** The general procedure B3 for the production of **5d**, **5h**, **5j**, **5q**.

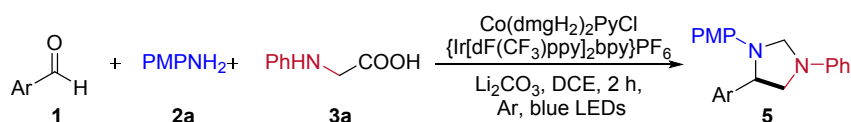

**2a** (0.2 mmol, 1.0 equiv), **3a** (0.6 mmol, 3.0 equiv), {Ir[dF(CF<sub>3</sub>)ppy]<sub>2</sub>bpy}PF<sub>6</sub> (0.002 mmol, 1.0 mol%), Co(dmgH<sub>2</sub>)<sub>2</sub>PyCl (0.03 mmol, 15 mol%), Li<sub>2</sub>CO<sub>3</sub> (0.04 mmol, 20 mol%) were added into a 10 mL Schlenk tube. Subsequently, DCE (2 mL) and **1** (0.2 mmol, 1.0 equiv) was added, degassed three times by freeze-pump-thaw method. The reaction mixture was stirred under an argon

atmosphere irradiated by blue LEDs ( $\lambda_{\text{max}} = 455 \text{ nm}$ ) from a 3.0 cm distance for 2 h at room temperature. The mixture was quenched with water (10 mL) and then extracted with ethyl acetate (5 mL  $\times$  2). The organic layer was dried over  $\text{Na}_2\text{SO}_4$  and evaporated in vacuum. The residue was purified by silica gel column chromatography (PE / EtOAc = 50:1 ) to afford the desired product **5d**, **5h**, **5j**, **5q**.

### III Optimization of reaction conditions

**Table S1** Reaction condition optimization. <sup>a</sup>

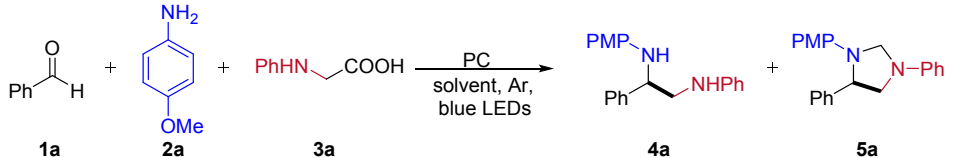

| Entry                 | PC                                                                                         | Solvent              | Yield (%) <sup>b</sup><br><b>4a/5a</b> |
|-----------------------|--------------------------------------------------------------------------------------------|----------------------|----------------------------------------|
| 1                     | $\text{Ir}(\text{ppy})_3$                                                                  | DCE                  | 40/22                                  |
| 2                     | $\{\text{Ir}[\text{dF}(\text{CF}_3)\text{ppy}]_2\text{bpy}\}\text{PF}_6$                   | DCE                  | 49/24                                  |
| 3                     | $\{\text{Ir}[\text{dF}(\text{CF}_3)\text{ppy}]_2\text{dtbbpy}\}\text{PF}_6$                | DCE                  | 30/23                                  |
| 4                     | $[\text{Ir}(\text{ppy})_2\text{dtbbpy}]\text{PF}_6$                                        | DCE                  | trace                                  |
| 5                     | $\text{Ru}(\text{bpy})_3(\text{PF}_6)_2$                                                   | DCE                  | trace                                  |
| 6                     | 4CzIPN                                                                                     | DCE                  | 42/25                                  |
| 7                     | $\{\text{Ir}[\text{dF}(\text{CF}_3)\text{ppy}]_2\text{bpy}\}\text{PF}_6$                   | DCM                  | 43/26                                  |
| 8                     | $\{\text{Ir}[\text{dF}(\text{CF}_3)\text{ppy}]_2\text{bpy}\}\text{PF}_6$                   | THF                  | 34/22                                  |
| 9                     | $\{\text{Ir}[\text{dF}(\text{CF}_3)\text{ppy}]_2\text{bpy}\}\text{PF}_6$                   | MeCN                 | 37/24                                  |
| 10                    | $\{\text{Ir}[\text{dF}(\text{CF}_3)\text{ppy}]_2\text{bpy}\}\text{PF}_6$                   | Toluene              | 16/20                                  |
| 11                    | $\{\text{Ir}[\text{dF}(\text{CF}_3)\text{ppy}]_2\text{bpy}\}\text{PF}_6$                   | DMF                  | 75/13                                  |
| <b>12</b>             | <b><math>\{\text{Ir}[\text{dF}(\text{CF}_3)\text{ppy}]_2\text{bpy}\}\text{PF}_6</math></b> | <b>DMA</b>           | <b>88/9</b>                            |
| 13                    | $\{\text{Ir}[\text{dF}(\text{CF}_3)\text{ppy}]_2\text{bpy}\}\text{PF}_6$                   | DMSO                 | 20/trace                               |
| 14                    | $\{\text{Ir}[\text{dF}(\text{CF}_3)\text{ppy}]_2\text{bpy}\}\text{PF}_6$                   | $\text{H}_2\text{O}$ | trace                                  |
| 15 <sup>c</sup>       | $\{\text{Ir}[\text{dF}(\text{CF}_3)\text{ppy}]_2\text{bpy}\}\text{PF}_6$                   | DMA                  | -                                      |
| 16 <sup>d</sup>       | $\{\text{Ir}[\text{dF}(\text{CF}_3)\text{ppy}]_2\text{bpy}\}\text{PF}_6$                   | DMA                  | 72/12                                  |
| 17 <sup>e</sup>       | $\{\text{Ir}[\text{dF}(\text{CF}_3)\text{ppy}]_2\text{bpy}\}\text{PF}_6$                   | DMA                  | 83/14                                  |
| 18 <sup>f</sup>       | $\{\text{Ir}[\text{dF}(\text{CF}_3)\text{ppy}]_2\text{bpy}\}\text{PF}_6$                   | DMA                  | 67/6                                   |
| 19 <sup>g</sup>       | $\{\text{Ir}[\text{dF}(\text{CF}_3)\text{ppy}]_2\text{bpy}\}\text{PF}_6$                   | DMA                  | 81/8                                   |
| 20 <sup>h</sup>       | $\{\text{Ir}[\text{dF}(\text{CF}_3)\text{ppy}]_2\text{bpy}\}\text{PF}_6$                   | DMA                  | 82/16                                  |
| 21 <sup>i</sup>       | $\{\text{Ir}[\text{dF}(\text{CF}_3)\text{ppy}]_2\text{bpy}\}\text{PF}_6$                   | DMA                  | 66/7                                   |
| 22 <sup>j</sup>       | $\{\text{Ir}[\text{dF}(\text{CF}_3)\text{ppy}]_2\text{bpy}\}\text{PF}_6$                   | DMA                  | 83/15                                  |
| 23 <sup>k</sup>       | $\{\text{Ir}[\text{dF}(\text{CF}_3)\text{ppy}]_2\text{bpy}\}\text{PF}_6$                   | DMA                  | 81/17                                  |
| <b>24<sup>l</sup></b> | <b><math>\{\text{Ir}[\text{dF}(\text{CF}_3)\text{ppy}]_2\text{bpy}\}\text{PF}_6</math></b> | <b>DMA</b>           | <b>trace/58</b>                        |
| 25                    | -                                                                                          | DMA                  | -                                      |
| 26 <sup>m</sup>       | $\{\text{Ir}[\text{dF}(\text{CF}_3)\text{ppy}]_2\text{bpy}\}\text{PF}_6$                   | DMA                  | -                                      |

<sup>a</sup>Reaction conditions: **1a** (1.0 equiv, 0.1 mmol), **2a** (1.0 equiv, 0.1 mmol), **3a** (3.0 equiv, 0.3 mmol), PC (1 mol%) in 1 mL solvent, room temperature, 2 h. <sup>b</sup>Yield of isolated product. <sup>c</sup>0 mol% PC. <sup>d</sup>0.5 mol% PC. <sup>e</sup>1.5 mol% PC. <sup>f</sup>1 equiv. **3a**. <sup>g</sup>2 equiv. **3a**. <sup>h</sup>4 equiv. **3a**. <sup>i</sup>30 min. <sup>j</sup>4 h. <sup>k</sup>8 h. <sup>l</sup>under Air. <sup>m</sup>without blue LEDs.

**Table S2** Reaction condition optimization. <sup>a</sup>

Reaction scheme: **1a** (benzaldehyde) + **2a** (4-methoxyaniline) + **3a** (N-phenylglycine)  $\xrightarrow[\text{solvent, Ar, blue LEDs}]{\text{PC}}$  **4a** (N-phenyl-1-phenylethylamine) + **5a** (N-phenyl-1-phenylethylamine)

| Entry                 | PC                                                               | Solvent           | Additive                                                 | Yield (%) <sup>b</sup><br><b>4a/5a</b> |
|-----------------------|------------------------------------------------------------------|-------------------|----------------------------------------------------------|----------------------------------------|
| 1                     | {Ir[dF(CF <sub>3</sub> )ppy] <sub>2</sub> bpy}PF <sub>6</sub>    | DCE               | Co(dmgh <sub>2</sub> ) <sub>2</sub> Cl <sub>2</sub>      | trace/62                               |
| 2                     | {Ir[dF(CF <sub>3</sub> )ppy] <sub>2</sub> bpy}PF <sub>6</sub>    | DCE               | Co(dmgh <sub>2</sub> ) <sub>2</sub> DMAP·Cl              | 10/68                                  |
| 3                     | {Ir[dF(CF <sub>3</sub> )ppy] <sub>2</sub> bpy}PF <sub>6</sub>    | DCE               | Co(dmgh <sub>2</sub> ) <sub>2</sub> (CH <sub>3</sub> CN) | 12/66                                  |
| 4                     | {Ir[dF(CF <sub>3</sub> )ppy] <sub>2</sub> bpy}PF <sub>6</sub>    | DCE               | Co(dmgh <sub>2</sub> ) <sub>2</sub> PyCl                 | 11/70                                  |
| 5                     | Ir(ppy) <sub>3</sub>                                             | DCE               | Co(dmgh <sub>2</sub> ) <sub>2</sub> PyCl                 | 17/56                                  |
| 6                     | {Ir[dF(CF <sub>3</sub> )ppy] <sub>2</sub> dtbbpy}PF <sub>6</sub> | DCE               | Co(dmgh <sub>2</sub> ) <sub>2</sub> PyCl                 | 15/50                                  |
| 7                     | [Ir(ppy) <sub>2</sub> dtbbpy]PF <sub>6</sub>                     | DCE               | Co(dmgh <sub>2</sub> ) <sub>2</sub> PyCl                 | 10/63                                  |
| 8                     | Ru(bpy) <sub>3</sub> (PF <sub>6</sub> ) <sub>2</sub>             | DCE               | Co(dmgh <sub>2</sub> ) <sub>2</sub> PyCl                 | 11/52                                  |
| 9                     | 4CzIPN                                                           | DCE               | Co(dmgh <sub>2</sub> ) <sub>2</sub> PyCl                 | 14/53                                  |
| 10                    | {Ir[dF(CF <sub>3</sub> )ppy] <sub>2</sub> bpy}PF <sub>6</sub>    | DCM               | Co(dmgh <sub>2</sub> ) <sub>2</sub> PyCl                 | 12/68                                  |
| 11                    | {Ir[dF(CF <sub>3</sub> )ppy] <sub>2</sub> bpy}PF <sub>6</sub>    | THF               | Co(dmgh <sub>2</sub> ) <sub>2</sub> PyCl                 | 9/38                                   |
| 12                    | {Ir[dF(CF <sub>3</sub> )ppy] <sub>2</sub> bpy}PF <sub>6</sub>    | MeCN              | Co(dmgh <sub>2</sub> ) <sub>2</sub> PyCl                 | 14/44                                  |
| 13                    | {Ir[dF(CF <sub>3</sub> )ppy] <sub>2</sub> bpy}PF <sub>6</sub>    | Et <sub>2</sub> O | Co(dmgh <sub>2</sub> ) <sub>2</sub> PyCl                 | 10/65                                  |
| 14                    | {Ir[dF(CF <sub>3</sub> )ppy] <sub>2</sub> bpy}PF <sub>6</sub>    | Toluene           | Co(dmgh <sub>2</sub> ) <sub>2</sub> PyCl                 | trace                                  |
| 15                    | {Ir[dF(CF <sub>3</sub> )ppy] <sub>2</sub> bpy}PF <sub>6</sub>    | DMA               | Co(dmgh <sub>2</sub> ) <sub>2</sub> PyCl                 | 16/44                                  |
| 16                    | {Ir[dF(CF <sub>3</sub> )ppy] <sub>2</sub> bpy}PF <sub>6</sub>    | DMSO              | Co(dmgh <sub>2</sub> ) <sub>2</sub> PyCl                 | 13/36                                  |
| 17 <sup>c</sup>       | {Ir[dF(CF <sub>3</sub> )ppy] <sub>2</sub> bpy}PF <sub>6</sub>    | DCE               | Co(dmgh <sub>2</sub> ) <sub>2</sub> PyCl                 | -                                      |
| 18 <sup>d</sup>       | {Ir[dF(CF <sub>3</sub> )ppy] <sub>2</sub> bpy}PF <sub>6</sub>    | DCE               | Co(dmgh <sub>2</sub> ) <sub>2</sub> PyCl                 | 22/32                                  |
| 19 <sup>e</sup>       | {Ir[dF(CF <sub>3</sub> )ppy] <sub>2</sub> bpy}PF <sub>6</sub>    | DCE               | Co(dmgh <sub>2</sub> ) <sub>2</sub> PyCl                 | 12/71                                  |
| 20 <sup>f</sup>       | {Ir[dF(CF <sub>3</sub> )ppy] <sub>2</sub> bpy}PF <sub>6</sub>    | DCE               | Co(dmgh <sub>2</sub> ) <sub>2</sub> PyCl                 | 18/53                                  |
| <b>21<sup>g</sup></b> | <b>{Ir[dF(CF<sub>3</sub>)ppy]<sub>2</sub>bpy}PF<sub>6</sub></b>  | <b>DCE</b>        | <b>Co(dmgh<sub>2</sub>)<sub>2</sub>PyCl</b>              | <b>trace/74</b>                        |
| 22 <sup>h</sup>       | {Ir[dF(CF <sub>3</sub> )ppy] <sub>2</sub> bpy}PF <sub>6</sub>    | DCE               | Co(dmgh <sub>2</sub> ) <sub>2</sub> PyCl                 | trace/74                               |
| 23 <sup>i</sup>       | {Ir[dF(CF <sub>3</sub> )ppy] <sub>2</sub> bpy}PF <sub>6</sub>    | DCE               | Co(dmgh <sub>2</sub> ) <sub>2</sub> PyCl                 | trace/24                               |
| 24 <sup>j</sup>       | {Ir[dF(CF <sub>3</sub> )ppy] <sub>2</sub> bpy}PF <sub>6</sub>    | DCE               | Co(dmgh <sub>2</sub> ) <sub>2</sub> PyCl                 | trace/48                               |
| 25 <sup>k</sup>       | {Ir[dF(CF <sub>3</sub> )ppy] <sub>2</sub> bpy}PF <sub>6</sub>    | DCE               | Co(dmgh <sub>2</sub> ) <sub>2</sub> PyCl                 | trace/76                               |
| 26 <sup>l</sup>       | {Ir[dF(CF <sub>3</sub> )ppy] <sub>2</sub> bpy}PF <sub>6</sub>    | DCE               | Co(dmgh <sub>2</sub> ) <sub>2</sub> PyCl                 | 17/44                                  |
| 27 <sup>m</sup>       | {Ir[dF(CF <sub>3</sub> )ppy] <sub>2</sub> bpy}PF <sub>6</sub>    | DCE               | Co(dmgh <sub>2</sub> ) <sub>2</sub> PyCl                 | trace/74                               |
| 28 <sup>n</sup>       | {Ir[dF(CF <sub>3</sub> )ppy] <sub>2</sub> bpy}PF <sub>6</sub>    | DCE               | Co(dmgh <sub>2</sub> ) <sub>2</sub> PyCl                 | trace/75                               |
| 29                    | -                                                                | DCE               | Co(dmgh <sub>2</sub> ) <sub>2</sub> PyCl                 | -                                      |
| 30 <sup>o</sup>       | {Ir[dF(CF <sub>3</sub> )ppy] <sub>2</sub> bpy}PF <sub>6</sub>    | DCE               | Co(dmgh <sub>2</sub> ) <sub>2</sub> PyCl                 | -                                      |

<sup>a</sup>Reaction conditions: **1a** (1.0 equiv, 0.1 mmol), **2a** (1.0 equiv, 0.1 mmol), **3a** (3.0 equiv, 0.3 mmol), PC (1 mol%), additive (10 mol%) in 1 mL solvent, room temperature, 2 h. <sup>b</sup>Yield of isolated product. <sup>c</sup>0 mol% PC. <sup>d</sup>0.5 mol% PC. <sup>e</sup>1.5 mol% PC. <sup>f</sup>5 mol% [Co]. <sup>g</sup>15 mol% [Co]. <sup>h</sup>20 mol% [Co]. <sup>i</sup>1 equiv. **3a**. <sup>j</sup>2 equiv. **3a**. <sup>k</sup>4 equiv. **3a**. <sup>l</sup>30 min. <sup>m</sup>4 h. <sup>n</sup>8 h. <sup>o</sup>without blue LEDs.

## IV Gram-scale reactions and synthetic utility of the reaction.

### Scheme 6 Gram-scale reactions.

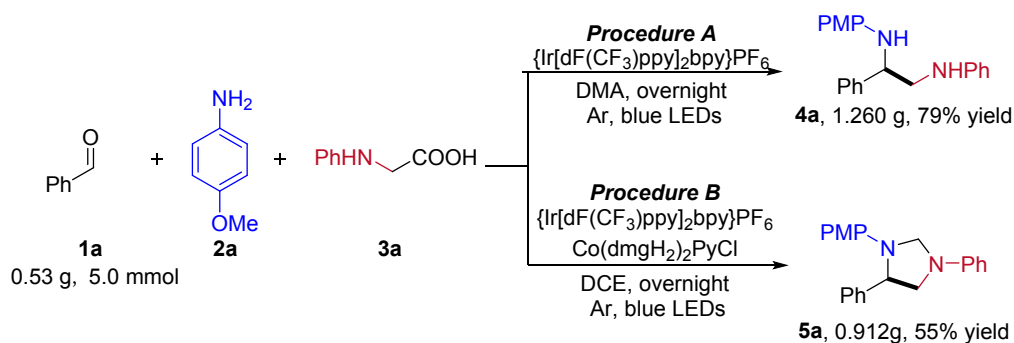

**Procedure A** : **2a** (5.0 mmol, 1.0 equiv), **3a** (15 mmol, 3.0 equiv),  $\{\text{Ir}[\text{dF}(\text{CF}_3)\text{ppy}]_2\text{bpy}\}\text{PF}_6$  (0.005 mmol, 0.1 mol%) were added into a 100 mL round-bottomed flask. Subsequently, DMA (50 mL) and **1a** (5 mmol, 1.0 equiv) was added, degassed three times by freeze-pump-thaw method. The reaction mixture was stirred under an argon atmosphere irradiated by blue LEDs ( $\lambda_{\text{max}} = 455$  nm) from a 3.0 cm distance at room temperature overnight. The mixture was quenched with water (150 mL) and then extracted with ethyl acetate (50 mL  $\times$  2). The organic layer was dried over  $\text{Na}_2\text{SO}_4$  and evaporated in vacuum. The residue was purified by silica gel column chromatography (PE / EtOAc = 20:1 ) to afford the desired product **4a** (1.260 g, 79% yield).

**Procedure B** : **2a** (5.0 mmol, 1.0 equiv), **3a** (15 mmol, 3.0 equiv),  $\{\text{Ir}[\text{dF}(\text{CF}_3)\text{ppy}]_2\text{bpy}\}\text{PF}_6$  (0.005 mmol, 0.1 mol%),  $\text{Co}(\text{dmgh}_2)_2\text{PyCl}$  (0.75 mmol, 15 mol%) were added into a 100 mL round-bottomed flask. Subsequently, DCE (50 mL) and **1a** (5 mmol, 1.0 equiv) was added, degassed three times by freeze-pump-thaw method. The reaction mixture was stirred under an argon atmosphere irradiated by blue LEDs ( $\lambda_{\text{max}} = 455$  nm) from a 3.0 cm distance at room temperature overnight. The mixture was quenched with water (150 mL) and then extracted with ethyl acetate (50 mL  $\times$  2). The organic layer was dried over  $\text{Na}_2\text{SO}_4$  and evaporated in vacuum. The residue was purified by silica gel column chromatography (PE / EtOAc = 50:1 ) to afford the desired product **5a** (0.912 g, 55% yield).

**Scheme 7** synthetic utility of the reaction.

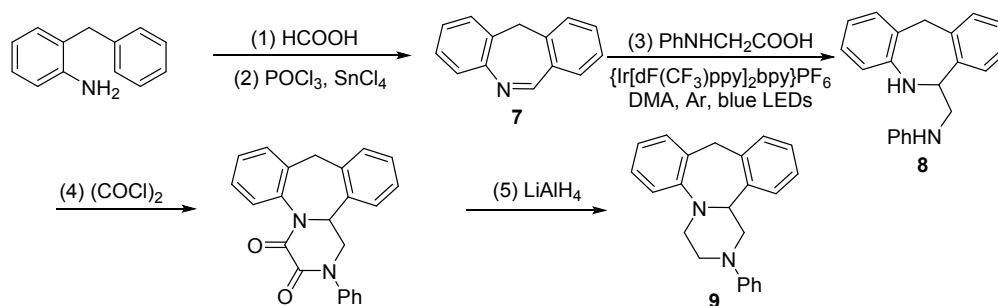

The starting materials **7** were prepared according to the literatures reported.<sup>3,4</sup>

**7** (4.0 mmol, 1.0 equiv), {Ir[dF(CF<sub>3</sub>)ppy]<sub>2</sub>bpy}PF<sub>6</sub> (0.004 mmol, 0.1 mol%), *N*-phenyl glycine **3a** (8.0 mmol, 3.0 equiv) and DMA (40 mL) were added into a 100 mL round-bottomed flask. The reaction mixture was stirred under an argon atmosphere irradiated by blue LED ( $\lambda_{\text{max}} = 455 \text{ nm}$ ) from a 3.0 cm distance overnight at room temperature (The color of reaction solution changed from brown to yellow). The mixture was quenched with water (150 mL), extracted with ethyl acetate (40 mL  $\times$  2). The organic layer was dried over Na<sub>2</sub>SO<sub>4</sub> and evaporated in vacuum. The residue was purified by silica gel column chromatography to afford the desired product **8** as white solid (781.2 mg, 65 % yield).

To a stirred solution of **8** (1.0 mmol, 1.0 equiv) in 5 mL THF was added triethylamine (2.3 mmol) followed by oxalyl chloride (1.1 mmol). After stirring for 30 min at rt, the reaction was diluted with EtOAc and then quenched with 5 mL of sat. aqueous NaHCO<sub>3</sub>. The organic layer was dried over Na<sub>2</sub>SO<sub>4</sub> and the solvent removed under reduced pressure. The residue was purified by silica gel column chromatography (PE : EtOAc = 1 : 1) to afford the piperazine-2,3-dione compound as yellow solid (332.9 mg, 94 % yield).

To a stirred solution of LAH (3 mmol) in THF (5 mL) was added the solution of diamide compound (0.5 mmol) in THF (5 mL) dropwise at 0 °C. The resulting suspension was heated on oil bath and refluxed for 5 h. After cooling down to room temperature, the reaction was quenched by the addition of water and 1N NaOH, extracted with ethyl acetate (5 mL  $\times$  3). The organic layer was dried over Na<sub>2</sub>SO<sub>4</sub> and evaporated in vacuum. The residue was purified by silica gel column chromatography to afford the desired product **9** as white solid. (86.5 mg, 53 % yield).



---

## VI Characterization of products

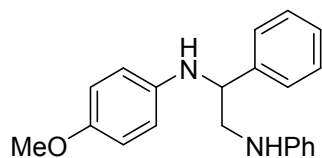

### *N*<sup>1</sup>-(4-methoxyphenyl)-*N*<sup>2</sup>,1-diphenylethane-1,2-diamine (4a)

Colorless oil, yield (88%);

<sup>1</sup>H NMR (500 MHz, CDCl<sub>3</sub>) δ 7.39 – 7.33 (m, 4H), 7.28 – 7.26 (m, 1H), 7.20 – 7.17 (dd, *J* = 8.3, 7.5 Hz, 2H), 6.74 (t, *J* = 7.3 Hz, 1H), 6.69 – 6.67 (m, 2H), 6.64 (d, *J* = 7.7 Hz, 2H), 6.52 – 6.50 (m, 2H), 4.55 (dd, *J* = 8.1, 4.7 Hz, 1H), 4.05 (s, 2H), 3.68 (s, 3H), 3.48 (dd, *J* = 12.5, 4.7 Hz, 1H), 3.37 (dd, *J* = 12.5, 8.2 Hz, 1H).

<sup>13</sup>C NMR (125 MHz, CDCl<sub>3</sub>) δ 152.4, 147.9, 141.6, 141.2, 129.4, 128.9, 127.6, 126.6, 118.2, 115.1, 114.8, 113.3, 58.4, 55.7, 51.1.

HRMS (ESI<sup>+</sup>) calcd for C<sub>21</sub>H<sub>23</sub>N<sub>2</sub>O (M+H)<sup>+</sup>, *m/z* 319.1805, found 319.1802.

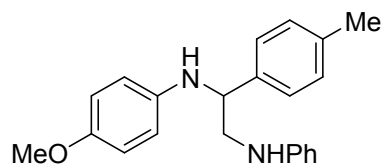

### *N*<sup>1</sup>-(4-methoxyphenyl)-*N*<sup>2</sup>-phenyl-1-(*p*-tolyl)ethane-1,2-diamine (4b)<sup>5</sup>

Colorless oil, yield (75%);

<sup>1</sup>H NMR (500 MHz, CDCl<sub>3</sub>) δ 7.26 (d, *J* = 8.0 Hz, 2H), 7.19 – 7.13 (m, 4H), 6.73 (t, *J* = 7.3 Hz, 1H), 6.69 – 6.66 (m, 2H), 6.63 (d, *J* = 7.7 Hz, 2H), 6.52 – 6.47 (m, 2H), 4.51 (dd, *J* = 8.1, 4.7 Hz, 1H), 3.97 (s, 2H), 3.67 (s, 3H), 3.44 (dd, *J* = 12.4, 4.7 Hz, 1H), 3.33 (dd, *J* = 12.4, 8.2 Hz, 1H), 2.32 (s, 3H).

<sup>13</sup>C NMR (125 MHz, CDCl<sub>3</sub>) δ 152.3, 148.0, 141.3, 138.5, 137.2, 129.6, 129.4, 126.5, 118.1, 115.4, 114.8, 113.3, 58.1, 55.8, 51.1, 21.1.

HRMS (ESI<sup>+</sup>) calcd for C<sub>22</sub>H<sub>25</sub>N<sub>2</sub>O (M+H)<sup>+</sup>, *m/z* 333.1961, found 333.1965.

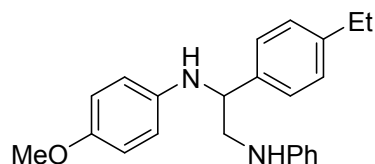

**1-(4-ethylphenyl)-*N*<sup>1</sup>-(4-methoxyphenyl)-*N*<sup>2</sup>-phenylethane-1,2-diamine (4c)**

Colorless oil, yield (80%);

<sup>1</sup>H NMR (500 MHz, CDCl<sub>3</sub>) δ 7.29 (d, *J* = 8.0 Hz, 2H), 7.19 – 7.16 (m, 4H), 6.73 (t, *J* = 7.3 Hz, 1H), 6.73 – 6.67 (m, 2H), 6.64 (d, *J* = 7.7 Hz, 2H), 6.52 – 6.49 (m, 2H), 4.53 (dd, *J* = 8.1, 4.7 Hz, 1H), 3.97 (s, 2H), 3.68 (s, 3H), 3.46 (dd, *J* = 12.4, 4.7 Hz, 1H), 3.34 (dd, *J* = 12.4, 8.2 Hz, 1H), 2.63 (q, *J* = 7.6 Hz, 2H), 1.23 (t, *J* = 7.6 Hz, 3H).

<sup>13</sup>C NMR (125 MHz, CDCl<sub>3</sub>) δ 152.3, 148.0, 143.5, 141.4, 138.8, 129.4, 128.4, 126.5, 118.1, 115.1, 114.8, 113.3, 58.0, 55.8, 51.1, 28.5, 15.5.

HRMS (ESI<sup>+</sup>) calcd for C<sub>23</sub>H<sub>27</sub>N<sub>2</sub>O (M+H)<sup>+</sup>, *m/z* 347.2118, found 347.2125.

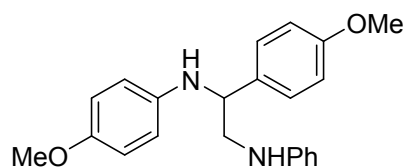

***N*<sup>1</sup>,1-bis(4-methoxyphenyl)-*N*<sup>2</sup>-phenylethane-1,2-diamine (4d)**

Colorless oil, yield (77%);

<sup>1</sup>H NMR (500 MHz, CDCl<sub>3</sub>) δ 7.31 – 7.28 (m, 2H), 7.19 – 7.16 (m, 2H), 6.89 – 6.86 (m, 2H), 6.74 (t, *J* = 7.3 Hz, 1H), 6.70 – 6.67 (m, 2H), 6.63 (d, *J* = 7.7 Hz, 2H), 6.52 – 6.48 (m, 2H), 4.50 (dd, *J* = 8.0, 4.8 Hz, 1H), 3.78 (s, 3H), 3.68 (s, 3H), 3.43 (dd, *J* = 12.4, 4.8 Hz, 1H), 3.34 (dd, *J* = 12.4, 8.1 Hz, 1H).

<sup>13</sup>C NMR (125 MHz, CDCl<sub>3</sub>) δ 159.0, 152.3, 148.0, 141.4, 133.5, 129.4, 127.6, 118.1, 115.1, 114.8, 114.3, 113.3, 57.7, 55.8, 55.3, 51.1.

HRMS (ESI<sup>+</sup>) calcd for C<sub>22</sub>H<sub>25</sub>N<sub>2</sub>O<sub>2</sub> (M+H)<sup>+</sup>, *m/z* 349.1911, found 349.1916.

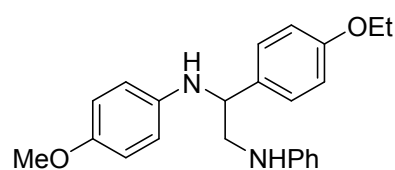

**1-(4-ethoxyphenyl)-*N*<sup>1</sup>-(4-methoxyphenyl)-*N*<sup>2</sup>-phenylethane-1,2-diamine (4e)**

Colorless oil, yield (76%);

$^1\text{H}$  NMR (500 MHz,  $\text{CDCl}_3$ )  $\delta$  7.30 – 7.25 (m, 2H), 7.19 – 7.16 (m, 2H), 6.88 – 6.85 (m, 2H), 6.73 (t,  $J$  = 7.3 Hz, 1H), 6.70 – 6.67 (m, 2H), 6.63 (d,  $J$  = 7.7 Hz, 2H), 6.51 – 6.48 (m, 2H), 4.49 (dd,  $J$  = 8.0, 4.8 Hz, 1H), 4.00 (q,  $J$  = 7.0 Hz, 2H), 3.68 (s, 3H), 3.43 (dd,  $J$  = 12.4, 4.9 Hz, 1H), 3.33 (dd,  $J$  = 12.4, 8.1 Hz, 1H), 1.39 (t,  $J$  = 7.0 Hz, 3H).

$^{13}\text{C}$  NMR (125 MHz,  $\text{CDCl}_3$ )  $\delta$  158.4, 152.3, 148.0, 141.4, 133.4, 129.4, 127.6, 118.1, 115.1, 114.8, 114.8, 113.3, 63.5, 57.7, 55.8, 51.1, 14.9.

HRMS (ESI+) calcd for  $\text{C}_{23}\text{H}_{27}\text{N}_2\text{O}_2$  ( $\text{M}+\text{H}$ ) $^+$ ,  $m/z$  363.2067, found 363.2062.

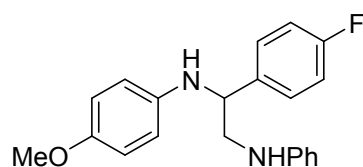

**1-(4-fluorophenyl)- $N^1$ -(4-methoxyphenyl)- $N^2$ -phenylethane-1,2-diamine (4f)**

Brown solid, yield (84%), mp. = 109.6 – 110.5  $^\circ\text{C}$ ;

$^1\text{H}$  NMR (500 MHz,  $\text{CDCl}_3$ )  $\delta$  7.35 (dd,  $J$  = 8.6, 5.4 Hz, 2H), 7.19 (dd,  $J$  = 8.4, 7.5 Hz, 2H), 7.03 (t,  $J$  = 8.6 Hz, 2H), 6.75 (t,  $J$  = 7.3 Hz, 1H), 6.70 – 6.67 (m, 2H), 6.64 (d,  $J$  = 7.7 Hz, 2H), 6.49 – 6.46 (m, 2H), 4.52 (dd,  $J$  = 8.2, 4.7 Hz, 1H), 3.68 (s, 3H), 3.44 (dd,  $J$  = 12.6, 4.7 Hz, 1H), 3.34 (dd,  $J$  = 12.6, 8.2 Hz, 1H).

$^{13}\text{C}$  NMR (125 MHz,  $\text{CDCl}_3$ )  $\delta$  162.19 (d,  $J$  = 244.1 Hz), 152.5, 147.8, 141.0, 137.3 ( $J$  = 3.0 Hz), 129.4, 128.1 (d,  $J$  = 8.0 Hz), 118.3, 115.8 (d,  $J$  = 21.3 Hz), 115.2, 114.8, 113.3, 57.8, 55.7, 51.1.

$^{19}\text{F}$  NMR (471 MHz,  $\text{CDCl}_3$ )  $\delta$  -115.03.

HRMS (ESI+) calcd for  $\text{C}_{21}\text{H}_{22}\text{FN}_2\text{O}$  ( $\text{M}+\text{H}$ ) $^+$ ,  $m/z$  337.1711, found 337.1714.

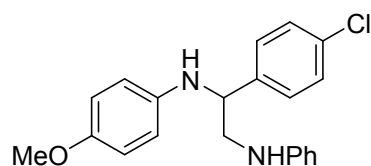

**1-(4-chlorophenyl)- $N^1$ -(4-methoxyphenyl)- $N^2$ -phenylethane-1,2-diamine (4g)**

Yellow oil, yield (57%);

$^1\text{H}$  NMR (500 MHz,  $\text{CDCl}_3$ )  $\delta$  7.34 – 7.29 (m, 4H), 7.21 – 7.17 (m, 2H), 6.76 (t,  $J = 7.3$  Hz, 1H), 6.70 – 6.67 (m, 2H), 6.65 – 6.63 (m, 2H), 6.48 – 6.45 (m, 2H), 4.52 (dd,  $J = 8.2, 4.7$  Hz, 1H), 3.69 (s, 3H), 3.45 (dd,  $J = 12.7, 4.7$  Hz, 1H), 3.34 (dd,  $J = 12.7, 8.2$  Hz, 1H).

$^{13}\text{C}$  NMR (125 MHz,  $\text{CDCl}_3$ )  $\delta$  151.4, 146.7, 139.9, 139.2, 132.2, 128.4, 128.0, 126.9, 117.3, 114.1, 113.8, 112.3, 56.7, 54.7, 50.0.

HRMS (ESI+) calcd for  $\text{C}_{21}\text{H}_{22}\text{ClN}_2\text{O}$  ( $\text{M}+\text{H}$ ) $^+$ ,  $m/z$  353.1415, found 353.1410.

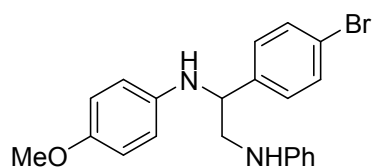

**1-(4-bromophenyl)- $N^1$ -(4-methoxyphenyl)- $N^2$ -phenylethane-1,2-diamine (4h)**

Brown solid, yield (60%), mp. = 118.9 – 119.9 °C;

$^1\text{H}$  NMR (500 MHz,  $\text{CDCl}_3$ )  $\delta$  7.47 (d,  $J = 8.4$  Hz, 2H), 7.26 (d,  $J = 8.4$  Hz, 2H), 7.20 – 7.17 (m, 2H), 6.77 – 6.74 (m, 1H), 6.70 – 6.67 (m, 2H), 6.64 (d,  $J = 7.7$  Hz, 2H), 6.48 – 6.45 (m, 2H), 4.50 (dd,  $J = 8.1, 4.7$  Hz, 1H), 3.69 (s, 3H), 3.44 (dd,  $J = 12.7, 4.7$  Hz, 1H), 3.34 (dd,  $J = 12.7, 8.2$  Hz, 1H).

$^{13}\text{C}$  NMR (125 MHz,  $\text{CDCl}_3$ )  $\delta$  152.5, 147.7, 140.9, 140.8, 132.0, 129.5, 128.3, 121.3, 118.4, 115.2, 114.9, 113.3, 57.9, 55.7, 51.0.

HRMS (ESI+) calcd for  $\text{C}_{21}\text{H}_{22}\text{BrN}_2\text{O}$  ( $\text{M}+\text{H}$ ) $^+$ ,  $m/z$  397.0910, found 397.0913.

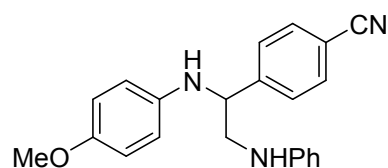

**4-(1-((4-methoxyphenyl)amino)-2-(phenylamino)ethyl)benzonitrile (4i)**

Yellow oil, yield (81%);

$^1\text{H}$  NMR (500 MHz,  $\text{CDCl}_3$ )  $\delta$  7.63 (d,  $J = 8.3$  Hz, 2H), 7.51 (d,  $J = 8.2$  Hz, 2H), 7.19 (dd,  $J = 8.4, 7.4$  Hz, 2H), 6.77 (t,  $J = 7.4$  Hz, 1H), 6.70 – 6.67 (m, 2H), 6.67 – 6.62 (m, 2H), 6.45 – 6.41 (m, 2H), 4.58 (dd,  $J = 8.2, 4.7$  Hz, 1H), 3.68 (s, 3H), 3.47 (dd,  $J = 12.9, 4.7$  Hz, 1H), 3.36 (dd,  $J = 12.9, 8.3$  Hz, 1H).

$^{13}\text{C}$  NMR (125 MHz,  $\text{CDCl}_3$ )  $\delta$  152.7, 147.627, 147.5, 140.6, 132.7, 129.5, 127.4, 118.8, 118.6, 115.1, 114.9, 113.3, 111.5, 58.2, 55.7, 50.9.

HRMS (ESI+) calcd for  $\text{C}_{22}\text{H}_{22}\text{N}_3\text{O}$  ( $\text{M}+\text{H}$ ) $^+$ ,  $m/z$  344.1757, found 344.1750.

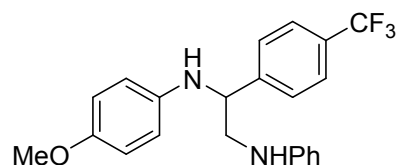

***N*<sup>1</sup>-(4-methoxyphenyl)-*N*<sup>2</sup>-phenyl-1-(4-(trifluoromethyl)phenyl)ethane-1,2-diamine (4j)**

White solid, yield (85%), mp. = 88.7 – 89.2 °C;

$^1\text{H}$  NMR (500 MHz,  $\text{CDCl}_3$ )  $\delta$  7.61 (d,  $J$  = 8.2 Hz, 2H), 7.52 (d,  $J$  = 8.2 Hz, 2H), 7.22 – 7.18 (m, 2H), 6.77 (t,  $J$  = 7.3 Hz, 1H), 6.71 – 6.65 (m, 4H), 6.48 – 6.45 (m, 2H), 4.61 (dd,  $J$  = 8.2, 4.7 Hz, 1H), 3.69 (s, 3H), 3.49 (dd,  $J$  = 12.8, 4.7 Hz, 1H), 3.37 (dd,  $J$  = 12.8, 8.3 Hz, 1H).

$^{13}\text{C}$  NMR (125 MHz,  $\text{CDCl}_3$ )  $\delta$  152.6, 147.6, 146.0, 140.8, 129.9 (q,  $J$  = 32.1 Hz), 129.5, 127.0, 125.9 (q,  $J$  = 3.7 Hz), 124.1 (q,  $J$  = 277.9 Hz), 118.4, 115.1, 114.9, 113.3, 58.1, 55.7, 51.0.

$^{19}\text{F}$  NMR (471 MHz,  $\text{CDCl}_3$ )  $\delta$  -62.42.

HRMS (ESI+) calcd for  $\text{C}_{22}\text{H}_{22}\text{F}_3\text{N}_2\text{O}$  ( $\text{M}+\text{H}$ ) $^+$ ,  $m/z$  387.1679, found 387.1685.

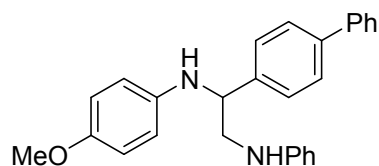

**1-([1,1'-biphenyl]-4-yl)-*N*<sup>1</sup>-(4-methoxyphenyl)-*N*<sup>2</sup>-phenylethane-1,2-diamine (4k)**

Brown solid, yield (78%), mp. = 62.1 – 63.4 °C;

$^1\text{H}$  NMR (500 MHz,  $\text{CDCl}_3$ )  $\delta$  7.58 (d,  $J$  = 8.0 Hz, 4H), 7.46 – 7.41 (m, 4H), 7.34 (t,  $J$  = 7.3 Hz, 1H), 7.20 (t,  $J$  = 7.6 Hz, 2H), 6.76 (t,  $J$  = 7.3 Hz, 1H), 6.71 (d,  $J$  = 8.6 Hz, 2H), 6.67 (d,  $J$  = 8.3 Hz, 2H), 6.55 – 6.53 (t,  $J$  = 6.0 Hz, 2H), 4.60 (dd,  $J$  = 8.1, 4.7 Hz, 1H), 3.69 (s, 3H), 3.52 (dd,  $J$  = 12.5, 4.7 Hz, 1H), 3.40 (dd,  $J$  = 12.5, 8.2 Hz, 1H).

$^{13}\text{C}$  NMR (125 MHz,  $\text{CDCl}_3$ )  $\delta$  152.4, 147.9, 141.3, 140.8, 140.7, 140.5, 129.4, 128.8, 127.6, 127.4, 127.1, 127.0, 118.2, 115.1, 114.9, 113.4, 58.1, 55.8, 51.1.

HRMS (ESI+) calcd for C<sub>27</sub>H<sub>27</sub>N<sub>2</sub>O (M+H)<sup>+</sup>, m/z 395.2118, found 395.2114.

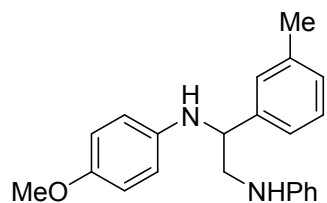

***N*<sup>1</sup>-(4-methoxyphenyl)-*N*<sup>2</sup>-phenyl-1-(*m*-tolyl)ethane-1,2-diamine (4l)**

Colorless oil, yield (62%);

<sup>1</sup>H NMR (500 MHz, CDCl<sub>3</sub>) δ 7.23 (d, *J* = 7.4 Hz, 1H), 7.19 – 7.17 (m, 4H), 7.09 (d, *J* = 7.3 Hz, 1H), 6.74 (t, *J* = 7.3 Hz, 1H), 6.70 (d, *J* = 8.9 Hz, 2H), 6.65 (d, *J* = 7.7 Hz, 2H), 6.52 (d, *J* = 8.9 Hz, 2H), 4.51 (dd, *J* = 7.9, 4.8 Hz, 1H), 4.11 (s, 1H), 3.92 (s, 1H), 3.69 (s, 3H), 3.47 (dd, *J* = 12.4, 4.6 Hz, 1H), 3.36 (dd, *J* = 12.3, 8.3 Hz, 1H), 2.35 (s, 3H).

<sup>13</sup>C NMR (125 MHz, CDCl<sub>3</sub>) δ 152.3, 147.9, 141.4, 138.5, 129.4, 128.7, 128.4, 127.2, 123.6, 118.1, 115.0, 114.8, 113.3, 100.0, 58.4, 55.7, 51.1, 21.6.

HRMS (ESI+) calcd for C<sub>22</sub>H<sub>25</sub>N<sub>2</sub>O (M+H)<sup>+</sup>, m/z 333.1961, found 333.1966.

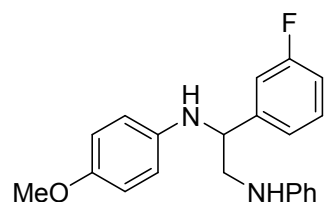

**1-(3-fluorophenyl)-*N*<sup>1</sup>-(4-methoxyphenyl)-*N*<sup>2</sup>-phenylethane-1,2-diamine (4m)**

Yellow oil, yield (74%);

<sup>1</sup>H NMR (500 MHz, CDCl<sub>3</sub>) δ 7.30 (td, *J* = 7.9, 5.9 Hz, 1H), 7.20 – 7.16 (m, 3H), 7.12 – 7.09 (m, 1H), 6.97 – 6.93 (m, 1H), 6.77 – 6.74 (m, 1H), 6.70 – 6.67 (m, 2H), 6.65 – 6.63 (m, 2H), 6.49 – 6.46 (m, 2H), 4.52 (dd, *J* = 8.2, 4.6 Hz, 1H), 4.14 (s, 1H), 3.87 (s, 1H), 3.68 (s, 3H), 3.46 (dd, *J* = 12.6, 4.4 Hz, 1H), 3.33 (dd, *J* = 12.5, 8.3 Hz, 1H).

<sup>13</sup>C NMR (125 MHz, CDCl<sub>3</sub>) δ 164.4 (d, *J* = 245.1 Hz), 152.5, 144.8, 144.7 (d, *J* = 6.3 Hz), 141.0, 130.4 (d, *J* = 8.1 Hz), 129.5, 122.2 (d, *J* = 2.7 Hz), 118.4, 115.1, 114.9, 114.62 (d, *J* = 21.1 Hz), 113.5 (d, *J* = 21.7 Hz), 113.4, 58.1, 58.1, 55.8, 51.0.

---

$^{19}\text{F}$  NMR (471 MHz,  $\text{CDCl}_3$ )  $\delta$  -112.23.

HRMS (ESI+) calcd for  $\text{C}_{21}\text{H}_{22}\text{FN}_2\text{O}$  ( $\text{M}+\text{H}$ ) $^+$ ,  $m/z$  337.1711, found 337.1715.

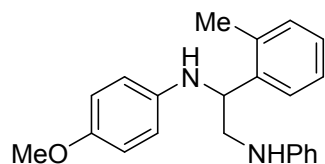

***N*<sup>1</sup>-(4-methoxyphenyl)-*N*<sup>2</sup>-phenyl-1-(*o*-tolyl)ethane-1,2-diamine (4n)**

Colorless oil, yield (61%);

$^1\text{H}$  NMR (500 MHz,  $\text{CDCl}_3$ )  $\delta$  7.42 – 7.41 (m, 1H), 7.19 – 7.16 (m, 5H), 6.74 (t,  $J$  = 7.3 Hz, 1H), 6.68 (d,  $J$  = 8.9 Hz, 2H), 6.64 (d,  $J$  = 8.4 Hz, 2H), 6.44 (d,  $J$  = 8.9 Hz, 2H), 4.77 (dd,  $J$  = 8.4, 4.4 Hz, 1H), 3.68 (s, 3H), 3.44 (dd,  $J$  = 12.5, 4.4 Hz, 1H), 3.28 (dd,  $J$  = 12.5, 8.4 Hz, 1H), 2.44 (s, 3H).

$^{13}\text{C}$  NMR (125 MHz,  $\text{CDCl}_3$ )  $\delta$  152.3, 148.0, 141.3, 139.2, 135.4, 130.9, 129.4, 127.3, 126.7, 125.5, 118.1, 114.9, 114.8, 113.3, 55.8, 54.8, 49.4, 19.3.

HRMS (ESI+) calcd for  $\text{C}_{22}\text{H}_{25}\text{N}_2\text{O}$  ( $\text{M}+\text{H}$ ) $^+$ ,  $m/z$  333.1961, found 333.1957.

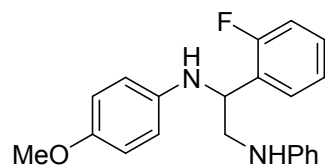

**1-(2-fluorophenyl)-*N*<sup>1</sup>-(4-methoxyphenyl)-*N*<sup>2</sup>-phenylethane-1,2-diamine (4o)**

Yellow oil, yield (74%);

$^1\text{H}$  NMR (500 MHz,  $\text{CDCl}_3$ )  $\delta$  7.37 (td,  $J$  = 7.7, 1.7 Hz, 1H), 7.24 – 7.21 (m, 1H), 7.19 – 7.16 (m, 2H), 7.09 – 7.05 (m, 2H), 6.74 (t,  $J$  = 7.3 Hz, 1H), 6.71 – 6.64 (m, 4H), 6.54 – 6.49 (m, 2H), 4.89 (dd,  $J$  = 8.4, 4.3 Hz, 1H), 4.12 (s, 1H), 3.95 (s, 1H), 3.67 (s, 3H), 3.57 (dd,  $J$  = 12.6, 4.1 Hz, 1H), 3.34 (dd,  $J$  = 12.6, 8.5 Hz, 1H)

$^{13}\text{C}$  NMR (125 MHz,  $\text{CDCl}_3$ )  $\delta$  160.9 (d,  $J$  = 243.6 Hz), 152.6, 147.9, 141.0, 129.4, 129.0 (d,  $J$  = 8.3 Hz), 128.3 (d,  $J$  = 13.2 Hz), 128.2 (d,  $J$  = 4.6 Hz), 124.6 (d,  $J$  = 3.3 Hz), 118.16, 115.8 (d,  $J$  = 21.7 Hz), 114.9, 113.3, 55.7, 52.9, 49.4.

$^{19}\text{F}$  NMR (471 MHz,  $\text{CDCl}_3$ )  $\delta$  -119.25.

HRMS (ESI+) calcd for C<sub>21</sub>H<sub>22</sub>FN<sub>2</sub>O (M+H)<sup>+</sup>, m/z 337.1711, found 337.1708.

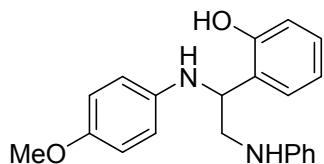

**2-(1-((4-methoxyphenyl)amino)-2-(phenylamino)ethyl)phenol (4p)**

Colorless oil, yield (72%);

<sup>1</sup>H NMR (500 MHz, CDCl<sub>3</sub>) δ 7.23 – 7.13 (m, 3H), 7.13 (d, *J* = 7.5 Hz, 1H), 6.89 (t, *J* = 7.4 Hz, 1H), 6.84 (d, *J* = 8.1 Hz, 1H), 6.79 (t, *J* = 7.3 Hz, 1H), 6.74 – 6.69 (m, 6H), 4.42 (dd, *J* = 9.8, 4.5 Hz, 1H), 3.68 (s, 3H), 3.58 (dd, *J* = 13.5, 10.0 Hz, 1H), 3.45 (dd, *J* = 13.5, 4.6 Hz, 1H).

<sup>13</sup>C NMR (125 MHz, CDCl<sub>3</sub>) δ 157.1, 154.8, 147.5, 140.0, 129.5, 129.1, 128.2, 124.0, 120.1, 118.9, 118.7, 117.3, 114.7, 113.7, 61.5, 55.6, 49.1.

HRMS (ESI+) calcd for C<sub>21</sub>H<sub>23</sub>N<sub>2</sub>O<sub>2</sub> (M+H)<sup>+</sup>, m/z 335.1754, found 335.1758.

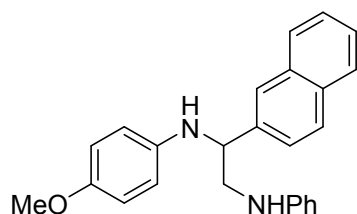

**N<sup>1</sup>-(4-methoxyphenyl)-1-(naphthalen-2-yl)-N<sup>2</sup>-phenylethane-1,2-diamine (4q)**

Brown solid, yield (75%), mp. = 68.6 – 70.2 °C;

<sup>1</sup>H NMR (500 MHz, CDCl<sub>3</sub>) δ 7.84 – 7.79 (m, 4H), 7.51 (dd, *J* = 8.5, 1.6 Hz, 1H), 7.48 – 7.43 (m, 2H), 7.20 – 7.17 (m, 2H), 6.75 (t, *J* = 7.3 Hz, 1H), 6.67 – 6.64 (m, 4H), 6.55 – 6.52 (m, 2H), 4.70 (dd, *J* = 8.0, 4.8 Hz, 1H), 3.66 (s, 3H), 3.55 (dd, *J* = 12.6, 4.8 Hz, 1H), 3.44 (dd, *J* = 12.6, 8.1 Hz, 1H).

<sup>13</sup>C NMR (125 MHz, CDCl<sub>3</sub>) δ 152.4, 147.9, 141.3, 139.2, 133.5, 133.1, 129.4, 128.8, 127.9, 127.8, 126.3, 125.9, 125.5, 124.6, 118.2, 115.2, 114.9, 113.4, 58.5, 55.7, 51.0.

HRMS (ESI+) calcd for C<sub>25</sub>H<sub>25</sub>N<sub>2</sub>O (M+H)<sup>+</sup>, m/z 369.1961, found 369.1966.



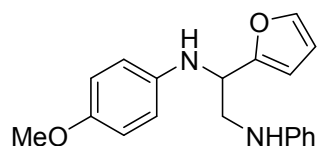

**1-(furan-2-yl)-*N*<sup>1</sup>-(4-methoxyphenyl)-*N*<sup>2</sup>-phenylethane-1,2-diamine (4r)**

Yellow oil, yield (60%);

<sup>1</sup>H NMR (500 MHz, CDCl<sub>3</sub>) δ 7.37 (dd, *J* = 1.7, 0.7 Hz, 1H), 7.18 (dd, *J* = 8.5, 7.4 Hz, 2H), 6.75 – 6.73 (m, 3H), 6.66 – 6.59 (m, 4H), 6.30 (dd, *J* = 3.2, 1.8 Hz, 1H), 6.21 (d, *J* = 3.2 Hz, 1H), 4.67 (dd, *J* = 7.1, 5.2 Hz, 1H), 3.72 (s, 3H), 3.62 (dd, *J* = 12.6, 5.1 Hz, 1H), 3.46 (dd, *J* = 12.6, 7.2 Hz, 1H).

<sup>13</sup>C NMR (125 MHz, CDCl<sub>3</sub>) δ 153.3, 151.8, 146.8, 141.0, 139.9, 128.3, 117.0, 114.6, 113.8, 112.4, 109.3, 106.0, 54.7, 51.8, 46.8.

HRMS (ESI<sup>+</sup>) calcd for C<sub>19</sub>H<sub>21</sub>N<sub>2</sub>O<sub>2</sub> (M+H)<sup>+</sup>, *m/z* 309.1598, found 359.1589.

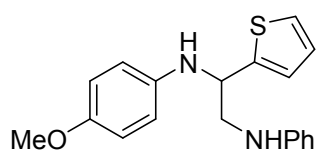

***N*<sup>1</sup>-(4-methoxyphenyl)-*N*<sup>2</sup>-phenyl-1-(thiophen-2-yl)ethane-1,2-diamine (4s)**

Yellow oil, yield (62%);

<sup>1</sup>H NMR (500 MHz, CDCl<sub>3</sub>) δ 7.22 – 7.18 (m, 3H), 7.01 – 7.00 (m, 1H), 6.98 – 6.97 (m, 1H), 6.77 – 6.72 (m, 3H), 6.67 – 6.65 (m, 2H), 6.62 – 6.59 (m, 2H), 4.85 (dd, *J* = 7.2, 5.1 Hz, 1H), 3.72 (s, 3H), 3.58 (dd, *J* = 12.6, 5.1 Hz, 1H), 3.49 (dd, *J* = 12.6, 7.4 Hz, 1H).

<sup>13</sup>C NMR (125 MHz, CDCl<sub>3</sub>) δ 152.8, 147.7, 146.5, 140.9, 129.4, 127.1, 124.4, 124.2, 118.2, 115.5, 114.8, 113.4, 55.7, 54.7, 50.9.

HRMS (ESI<sup>+</sup>) calcd for C<sub>19</sub>H<sub>21</sub>N<sub>2</sub>OS (M+H)<sup>+</sup>, *m/z* 325.1369, found 325.1366.

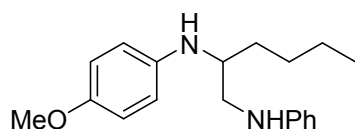

***N*<sup>2</sup>-(4-methoxyphenyl)-*N*<sup>1</sup>-phenylhexane-1,2-diamine (4t)**

Colorless oil, yield (51%);

$^1\text{H}$  NMR (500 MHz,  $\text{CDCl}_3$ )  $\delta$  7.17 (dd,  $J = 8.3, 7.5$  Hz, 2H), 6.79 – 6.76 (m, 2H), 6.71 (t,  $J = 7.3$  Hz, 1H), 6.62 – 6.59 (m, 4H), 3.75 (s, 3H), 3.51 (dt,  $J = 10.9, 6.5$  Hz, 1H), 3.53 – 3.50 (dd,  $J = 12.2, 4.4$  Hz, 1H), 3.01 (dd,  $J = 12.2, 7.6$  Hz, 1H), 1.61 – 1.55 (m, 2H), 1.39 – 1.30 (m, 4H), 0.89 (t,  $J = 7.1$  Hz, 3H).

$^{13}\text{C}$  NMR (125 MHz,  $\text{CDCl}_3$ )  $\delta$  152.3, 148.5, 141.9, 129.3, 117.6, 115.1, 115.0, 113.1, 55.8, 54.3, 48.0, 33.5, 28.3, 22.8, 14.0.

HRMS (ESI+) calcd for  $\text{C}_{19}\text{H}_{27}\text{N}_2\text{O}$  ( $\text{M}+\text{H}$ ) $^+$ ,  $m/z$  299.2118, found 299.2122.

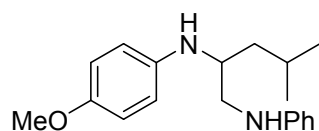

***N*<sup>2</sup>-(4-methoxyphenyl)-4-methyl-*N*<sup>1</sup>-phenylpentane-1,2-diamine (4u)**

Colorless oil, yield (54%);

$^1\text{H}$  NMR (500 MHz,  $\text{CDCl}_3$ )  $\delta$  7.17 (t,  $J = 7.7$  Hz, 2H), 6.77 (d,  $J = 8.8$  Hz, 2H), 6.71 (t,  $J = 7.3$  Hz, 1H), 6.62 – 6.60 (m, 4H), 3.75 (s, 3H), 3.61 – 3.56 (m, 1H), 3.36 (dd,  $J = 12.2, 4.3$  Hz, 1H), 2.98 (dd,  $J = 12.2, 7.3$  Hz, 1H), 1.79 – 1.73 (m, 1H), 1.53 – 1.36 (m, 1H), 1.42 – 1.36 (m, 1H), 0.95 (d,  $J = 6.6$  Hz, 3H), 0.90 (d,  $J = 6.5$  Hz, 3H).

$^{13}\text{C}$  NMR (125 MHz,  $\text{CDCl}_3$ )  $\delta$  152.3, 148.5, 141.9, 129.3, 117.6, 115.0, 115.0, 113.2, 55.8, 52.5, 48.3, 43.5, 25.1, 22.9, 22.8.

HRMS (ESI+) calcd for  $\text{C}_{19}\text{H}_{27}\text{N}_2\text{O}$  ( $\text{M}+\text{H}$ ) $^+$ ,  $m/z$  299.2118, found 299.2125.

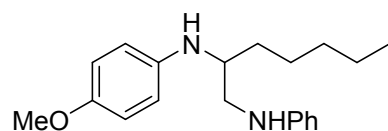

***N*<sup>2</sup>-(4-methoxyphenyl)-*N*<sup>1</sup>-phenyloctane-1,2-diamine (4v)**

Colorless oil, yield (48%);

$^1\text{H}$  NMR (500 MHz,  $\text{CDCl}_3$ )  $\delta$  7.17 (t,  $J = 7.9$  Hz, 2H), 6.79 – 6.76 (m, 2H), 6.71 (t,  $J = 7.3$  Hz, 1H), 6.62 – 6.60 (m, 4H), 3.75 (s, 3H), 3.53 – 3.49 (m, 1H), 3.36 (dd,  $J = 12.2, 4.4$  Hz, 1H), 3.01 (dd,  $J = 12.2,$

7.6 Hz, 1H), 1.62 – 1.51 (m, 2H), 1.42 – 1.36 (m, 2H), 1.30 – 1.25 (m, 4H), 0.87 (t,  $J = 6.9$  Hz, 3H).

$^{13}\text{C}$  NMR (125 MHz,  $\text{CDCl}_3$ )  $\delta$  151.3, 147.4, 140.9, 128.2, 116.5, 114.1, 114.0, 112.1, 54.8, 53.4, 46.9, 32.7, 30.9, 24.8, 21.6, 13.0.

HRMS (ESI+) calcd for  $\text{C}_{20}\text{H}_{29}\text{N}_2\text{O}$  ( $\text{M}+\text{H}$ ) $^+$ ,  $m/z$  313.2274, found 313.2270.

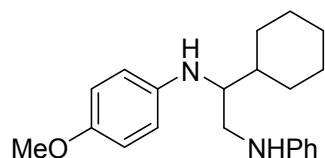

**1-cyclohexyl- $N^1$ -(4-methoxyphenyl)- $N^2$ -phenylethane-1,2-diamine (4w)**

Colorless oil, yield (43%);

$^1\text{H}$  NMR (500 MHz,  $\text{CDCl}_3$ )  $\delta$  7.18 – 7.14 (m, 2H), 6.78 – 6.75 (m, 2H), 6.72 – 6.69 (m, 1H), 6.62 – 6.57 (m, 4H), 3.75 (s, 3H), 3.38 (dt,  $J = 8.5, 4.0$  Hz, 2H), 2.96 (dd,  $J = 12.8, 9.6$  Hz, 1H), 1.83 – 1.73 (m, 4H), 1.69 – 1.56 (m, 2H), 1.26 – 1.07 (m, 5H).

$^{13}\text{C}$  NMR (125 MHz,  $\text{CDCl}_3$ )  $\delta$  152.1, 148.6, 142.6, 129.2, 117.5, 115.0, 114.9, 113.2, 59.0, 55.8, 45.6, 41.1, 29.7, 29.2, 26.5, 26.4, 26.4.

HRMS (ESI+) calcd for  $\text{C}_{21}\text{H}_{29}\text{N}_2\text{O}$  ( $\text{M}+\text{H}$ ) $^+$ ,  $m/z$  325.2274, found 325.2270.

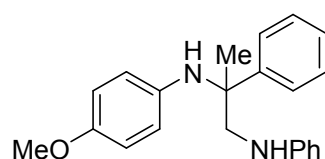

**$N^2$ -(4-methoxyphenyl)- $N^1,2$ -diphenylpropane-1,2-diamine (4x)**

Colorless oil, yield (61%);

$^1\text{H}$  NMR (500 MHz,  $\text{CDCl}_3$ )  $\delta$  7.54 – 7.52 (m, 2H), 7.38 (t,  $J = 7.7$  Hz, 2H), 7.28 (t,  $J = 7.3$  Hz, 1H), 7.19 – 7.16 (m, 2H), 6.73 (t,  $J = 7.3$  Hz, 1H), 6.66 – 6.61 (m, 4H), 6.39 – 6.35 (m, 2H), 3.68 (s, 3H), 3.43 (d,  $J = 1.6$  Hz, 2H), 1.71 (s, 3H).

$^{13}\text{C}$  NMR (125 MHz,  $\text{CDCl}_3$ )  $\delta$  152.4, 148.3, 144.8, 139.4, 129.3, 128.7, 127.0, 126.3, 118.0, 117.7, 114.4, 113.4, 59.1, 55.6, 29.7, 24.7.

HRMS (ESI+) calcd for  $\text{C}_{22}\text{H}_{25}\text{N}_2\text{S}$  ( $\text{M}+\text{H}$ ) $^+$ ,  $m/z$  333.1961, found 333.1966.

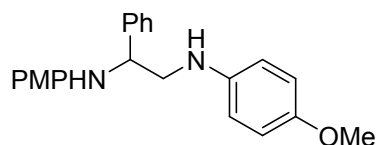

***N*<sup>1</sup>,*N*<sup>2</sup>-bis(4-methoxyphenyl)-1-phenylethane-1,2-diamine (4y)**

Colorless oil, yield (62%);

<sup>1</sup>H NMR (500 MHz, CDCl<sub>3</sub>) δ 7.39 – 7.33 (m, 4H), 7.28 – 7.25 (m, 1H), 6.80 – 6.77 (m, 2H), 6.69 – 6.67 (m, 2H), 6.62 – 6.60 (m, 2H), 6.51 – 6.48 (m, 2H), 4.53 (dd, *J* = 8.1, 4.6 Hz, 1H), 3.74 (s, 3H), 3.68 (s, 3H), 3.43 (dd, *J* = 12.4, 4.6 Hz, 1H), 3.31 (dd, *J* = 12.4, 8.2 Hz, 1H).

<sup>13</sup>C NMR (125 MHz, CDCl<sub>3</sub>) δ 152.6, 152.3, 142.0, 141.8, 141.4, 128.9, 127.5, 126.6, 115.1, 115.0, 114.8, 114.8, 58.3, 55.8, 55.7, 52.1.

HRMS (ESI<sup>+</sup>) calcd for C<sub>22</sub>H<sub>25</sub>N<sub>2</sub>O<sub>2</sub> (M+H)<sup>+</sup>, *m/z* 349.1911, found 349.1915.

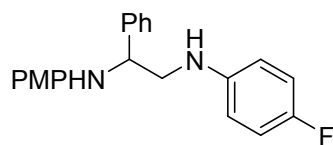

***N*<sup>2</sup>-(4-fluorophenyl)-*N*<sup>1</sup>-(4-methoxyphenyl)-1-phenylethane-1,2-diamine (4z)**

White solid, yield (74%), mp. = 71.7 – 72.8 °C;

<sup>1</sup>H NMR (500 MHz, CDCl<sub>3</sub>) δ 7.38 – 7.33 (m, 4H), 7.29 – 7.25 (m, 1H), 6.91 – 6.86 (m, 2H), 6.70 – 6.67 (m, 2H), 6.58 – 6.54 (m, 2H), 6.52 – 6.49 (m, 2H), 4.54 (dd, *J* = 8.1, 4.7 Hz, 1H), 4.12 (s, 1H), 3.80 (s, 1H), 3.68 (s, 3H), 3.43 (dd, *J* = 12.4, 4.7 Hz, 1H), 3.30 (dd, *J* = 12.4, 8.1 Hz, 1H).

<sup>13</sup>C NMR (125 MHz, CDCl<sub>3</sub>) δ 156.2 (d, *J* = 234.3 Hz), 152.4, 144.2 (d, *J* = 2.0 Hz), 141.5, 141.2, 128.9, 127.6, 126.5, 115.8 (d, *J* = 22.2 Hz), 115.1, 114.8, 114.2 (d, *J* = 7.3 Hz), 58.2, 55.7, 51.7.

<sup>19</sup>F NMR (471 MHz, CDCl<sub>3</sub>) δ -127.11.

HRMS (ESI<sup>+</sup>) calcd for C<sub>21</sub>H<sub>22</sub>FN<sub>2</sub>O (M+H)<sup>+</sup>, *m/z* 337.1711, found 337.1716.

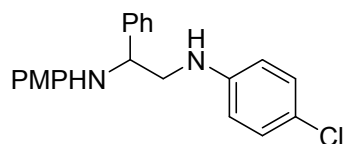

***N*<sup>2</sup>-(4-chlorophenyl)-*N*<sup>1</sup>-(4-methoxyphenyl)-1-phenylethane-1,2-diamine (4aa)**

White solid, yield (74%), mp. = 84.4 – 85.9 °C;

<sup>1</sup>H NMR (500 MHz, CDCl<sub>3</sub>) δ 7.37 – 7.33 (m, 4H), 7.30 – 7.26 (m, 1H), 7.13 – 7.10 (m, 2H), 6.71 – 6.68 (m, 2H), 6.55 – 6.49 (m, 4H), 4.55 (dd, *J* = 8.1, 4.8 Hz, 1H), 3.95 (s, 2H), 3.69 (s, 3H), 3.44 (dd, *J* = 12.5, 4.8 Hz, 1H), 3.33 (dd, *J* = 12.5, 8.1 Hz, 1H).

<sup>13</sup>C NMR (125 MHz, CDCl<sub>3</sub>) δ 152.4, 146.5, 141.4, 141.1, 129.2, 128.9, 127.7, 126.5, 122.7, 115.1, 114.9, 114.4, 58.2, 55.7, 51.1.

HRMS (ESI<sup>+</sup>) calcd for C<sub>21</sub>H<sub>22</sub>ClN<sub>2</sub>O (M+H)<sup>+</sup>, *m/z* 353.1415, found 353.1412.

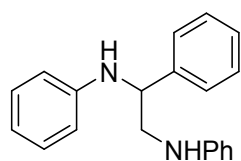

***N*<sup>1</sup>,*N*<sup>2</sup>,1-triphenylethane-1,2-diamine (4ab)**

White solid, yield (92%), mp. = 87.4 – 87.9 °C;

<sup>1</sup>H NMR (500 MHz, CDCl<sub>3</sub>) δ 7.41 – 7.39 (m, 2H), 7.37 – 7.34 (m, 2H), 7.29 – 7.26 (m, 1H), 7.21 – 7.17 (m, 2H), 7.11 – 7.08 (m, 2H), 6.76 – 6.73 (t, *J* = 7.3 Hz, 1H), 6.69 – 6.64 (m, 3H), 6.55 – 6.54 (dd, *J* = 8.5, 0.9 Hz, 2H), 4.64 (dd, *J* = 7.9, 4.8 Hz, 1H), 4.40 (s, 1H), 3.85 (s, 1H), 3.51 (dd, *J* = 12.5, 4.7 Hz, 1H), 3.39 (dd, *J* = 12.5, 8.0 Hz, 1H)

<sup>13</sup>C NMR (125 MHz, CDCl<sub>3</sub>) δ 147.8, 147.1, 141.4, 129.4, 129.2, 128.9, 127.6, 126.5, 118.2, 117.9, 113.7, 113.3, 57.4, 51.0

HRMS (ESI<sup>+</sup>) calcd for C<sub>20</sub>H<sub>21</sub>N<sub>2</sub> (M+H)<sup>+</sup>, *m/z* 289.1699, found 289.1696.

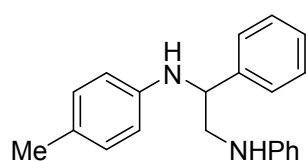

***N*<sup>2</sup>,1-diphenyl-*N*<sup>1</sup>-(*p*-tolyl)ethane-1,2-diamine (4ac)**

White solid, yield (64%), mp. = 75.3 – 77.0 °C;

<sup>1</sup>H NMR (500 MHz, CDCl<sub>3</sub>) δ 7.39 – 7.32 (m, 4H), 7.28 – 7.25 (m, 1H), 7.22 – 7.16 (m, 2H), 6.90 (d, *J* = 8.1 Hz, 2H), 6.75 – 6.72 (m, 1H), 6.63 (d, *J* = 8.4 Hz, 2H), 6.46 (d, *J* = 8.1 Hz, 2H), 4.60 (dd, *J* = 8.0, 4.7 Hz, 1H), 4.21 (s, 1H), 3.91 (s, 1H), 3.48 (dd, *J* = 12.5, 4.6 Hz, 1H), 3.36 (dd, *J* = 12.4, 8.1 Hz, 1H), 2.18 (s, 3H).

<sup>13</sup>C NMR (125 MHz, CDCl<sub>3</sub>) δ 147.9, 144.9, 141.6, 129.7, 129.4, 128.9, 127.6, 127.1, 126.5, 118.2, 113.9, 113.3, 57.7, 51.0, 20.4.

HRMS (ESI<sup>+</sup>) calcd for C<sub>21</sub>H<sub>23</sub>N<sub>2</sub> (M+H)<sup>+</sup>, *m/z* 303.1856, found 303.1848.

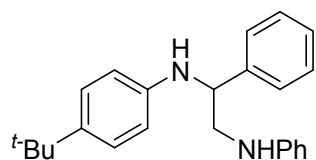

***N*<sup>1</sup>-(4-(tert-butyl)phenyl)-*N*<sup>2</sup>,1-diphenylethane-1,2-diamine (4ad)**

Colorless oil, yield (66%);

<sup>1</sup>H NMR (500 MHz, CDCl<sub>3</sub>) δ 7.41 – 7.33 (m, 2H), 7.35 (t, *J* = 7.6 Hz, 2H), 7.27 (t, *J* = 7.3 Hz, 1H), 7.17 (t, *J* = 7.9 Hz, 2H), 7.13 – 7.11 (m, 2H), 6.74 (t, *J* = 7.3 Hz, 1H), 6.63 – 6.61 (m, 2H), 6.51 – 6.49 (m, 2H), 4.59 (dd, *J* = 8.2, 4.7 Hz, 1H), 3.46 (dd, *J* = 12.5, 4.7 Hz, 1H), 3.36 (dd, *J* = 12.5, 8.3 Hz, 1H), 1.23 (s, 9H).

<sup>13</sup>C NMR (125 MHz, CDCl<sub>3</sub>) δ 147.9, 144.9, 141.7, 140.7, 129.4, 128.9, 127.6, 126.6, 126.0, 118.2, 113.5, 113.3, 57.8, 51.1, 33.9, 31.6.

HRMS (ESI<sup>+</sup>) calcd for C<sub>24</sub>H<sub>29</sub>N<sub>2</sub> (M+H)<sup>+</sup>, *m/z* 345.2325, found 345.2328.

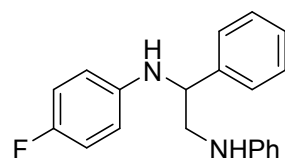

***N*<sup>1</sup>-(4-fluorophenyl)-*N*<sup>2</sup>,1-diphenylethane-1,2-diamine (4ae)**

Brown solid, yield (62%), mp. = 75.3 – 77.0 °C;

<sup>1</sup>H NMR (500 MHz, CDCl<sub>3</sub>) δ 7.31 – 7.26 (m, 4H), 7.23 – 7.19 (m, 1H), 7.13 – 7.10 (m, 2H), 6.73 – 6.66

(m, 3H), 6.57 (d,  $J = 7.7$  Hz, 2H), 6.39 – 6.37 (m, 2H), 4.48 (dd,  $J = 8.0, 4.7$  Hz, 1H), 3.42 (dd,  $J = 12.6, 4.7$  Hz, 1H), 3.30 (dd,  $J = 12.6, 8.0$  Hz, 1H).

$^{13}\text{C}$  NMR (125 MHz,  $\text{CDCl}_3$ )  $\delta$  156.9 (d,  $J = 234.2$  Hz), 147.8, 143.5 (d,  $J = 1.8$  Hz), 141.2, 129.4, 129.0, 127.7, 126.5, 118.3, 115.7 (d,  $J = 22.2$  Hz), 114.7 (d,  $J = 7.4$  Hz), 113.4, 58.1, 51.0.

$^{19}\text{F}$  NMR (471 MHz,  $\text{CDCl}_3$ )  $\delta$  -127.46.

HRMS (ESI+) calcd for  $\text{C}_{20}\text{H}_{20}\text{FN}_2$  ( $\text{M}+\text{H}$ ) $^+$ ,  $m/z$  307.1605, found 307.1606.

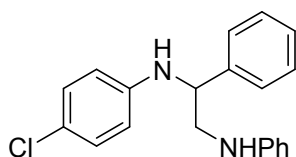

***N*<sup>1</sup>-(4-chlorophenyl)-*N*<sup>2</sup>,1-diphenylethane-1,2-diamine (4af)**

Brown solid, yield (50%), mp. = 81.1 – 82.9 °C;

$^1\text{H}$  NMR (500 MHz,  $\text{CDCl}_3$ )  $\delta$  7.37 – 7.36 (m, 4H), 7.31 – 7.28 (m, 1H), 7.21 – 7.18 (m, 2H), 7.04 – 7.01 (m, 2H), 6.76 (t,  $J = 7.3$  Hz, 1H), 6.65 (d,  $J = 7.8$  Hz, 2H), 6.46 – 6.43 (m, 2H), 4.59 (dd,  $J = 7.6, 4.8$  Hz, 1H), 4.45 (s, 1H), 3.80 (s, 1H), 3.52 (dd,  $J = 12.6, 4.7$  Hz, 1H), 3.40 (dd,  $J = 12.6, 7.8$  Hz, 1H).

$^{13}\text{C}$  NMR (125 MHz,  $\text{CDCl}_3$ )  $\delta$  147.7, 145.7, 140.8, 129.4, 129.0, 127.8, 126.4, 122.5, 118.4, 114.9, 113.4, 57.6, 50.9.

HRMS (ESI+) calcd for  $\text{C}_{20}\text{H}_{20}\text{ClN}_2$  ( $\text{M}+\text{H}$ ) $^+$ ,  $m/z$  323.1310, found 323.1316.

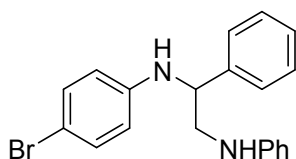

***N*<sup>1</sup>-(4-bromophenyl)-*N*<sup>2</sup>,1-diphenylethane-1,2-diamine (4ag)**

White solid, yield (36%), mp. = 88.7 – 90.1 °C;

$^1\text{H}$  NMR (500 MHz,  $\text{CDCl}_3$ )  $\delta$  7.36 (d,  $J = 4.5$  Hz, 4H), 7.31 – 7.27 (m, 1H), 7.21 – 7.15 (m, 4H), 6.76 (t,  $J = 7.3$  Hz, 1H), 6.65 (d,  $J = 8.4$  Hz, 2H), 6.41 (d,  $J = 8.8$  Hz, 2H), 4.58 (dd,  $J = 7.6, 4.8$  Hz, 1H), 3.53 (dd,  $J = 12.6, 4.7$  Hz, 1H), 3.40 (dd,  $J = 12.6, 7.7$  Hz, 1H).

---

$^{13}\text{C}$  NMR (125 MHz,  $\text{CDCl}_3$ )  $\delta$  147.7, 146.1, 140.7, 131.9, 129.4, 129.0, 127.8, 126.4, 118.4, 115.3, 113.4, 109.5, 57.5, 50.9.

HRMS (ESI<sup>+</sup>) calcd for  $\text{C}_{20}\text{H}_{20}\text{BrN}_2$  ( $\text{M}+\text{H}$ )<sup>+</sup>,  $m/z$  367.0804, found 367.0808.

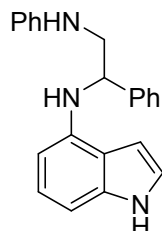

***N*<sup>1</sup>-(1H-indol-4-yl)-*N*<sup>2</sup>,1-diphenylethane-1,2-diamine (4ah)**

White solid, yield (80%), mp. = 67.8 – 69.6 °C;

$^1\text{H}$  NMR (500 MHz,  $\text{CDCl}_3$ )  $\delta$  8.08 (s, 1H), 7.45 – 7.44 (m, 2H), 7.34 (t,  $J$  = 7.5 Hz, 2H), 7.28 – 7.25 (m, 1H), 7.21 – 7.18 (m, 2H), 7.08 – 7.07 (m, 1H), 6.92 – 6.89 (m, 1H), 6.78 – 6.74 (m, 2H), 6.67 (d,  $J$  = 8.4 Hz, 2H), 6.47 – 6.47 (m, 1H), 6.06 (d,  $J$  = 7.7 Hz, 1H), 4.82 (dd,  $J$  = 7.9, 4.7 Hz, 1H), 3.60 (dd,  $J$  = 12.5, 4.7 Hz, 1H), 3.50 (dd,  $J$  = 12.5, 8.0 Hz, 1H).

$^{13}\text{C}$  NMR (125 MHz,  $\text{CDCl}_3$ )  $\delta$  148.0, 141.6, 140.1, 136.4, 129.4, 128.9, 127.5, 126.5, 123.4, 122.1, 118.1, 117.0, 113.4, 101.7, 101.1, 98.7, 57.7, 51.1.

HRMS (ESI<sup>+</sup>) calcd for  $\text{C}_{22}\text{H}_{22}\text{N}_3$  ( $\text{M}+\text{H}$ )<sup>+</sup>,  $m/z$  328.1808, found 328.1804.

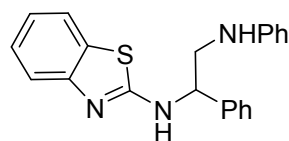

***N*<sup>1</sup>-(benzo[d]thiazol-2-yl)-*N*<sup>2</sup>,1-diphenylethane-1,2-diamine (4ai)**

Yellow oil, yield (93%);

$^1\text{H}$  NMR (500 MHz,  $\text{CDCl}_3$ )  $\delta$  7.54 – 7.50 (m, 2H), 7.45 – 7.39 (m, 4H), 7.36 – 7.33 (m, 1H), 7.25 – 7.23 (m, 1H), 7.20 – 7.17 (m, 2H), 7.08 – 7.05 (m, 1H), 6.75 (t,  $J$  = 7.4 Hz, 1H), 6.67 – 6.65 (m, 2H), 5.01 – 4.99 (m, 1H), 3.63 – 3.62 (m, 2H).

$^{13}\text{C}$  NMR (125 MHz,  $\text{CDCl}_3$ )  $\delta$  167.5, 151.8, 147.4, 139.5, 130.7, 129.4, 129.0, 128.2, 126.7, 126.0, 121.8, 120.9, 119.0, 118.3, 113.3, 59.0, 50.1.



---

HRMS (ESI+) calcd for  $C_{21}H_{20}N_3S$  (M+H)<sup>+</sup>, m/z 346.1372, found 346.1380.

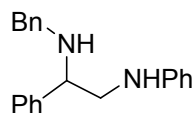

***N*<sup>1</sup>-benzyl-*N*<sup>2</sup>,1-diphenylethane-1,2-diamine (4aj)<sup>6</sup>**

Colorless oil, yield (43%);

<sup>1</sup>H NMR (500 MHz, CDCl<sub>3</sub>) δ 7.47 – 7.35 (m, 5H), 7.32 – 7.21 (m, 5H), 7.14 (t, *J* = 7.6 Hz, 2H), 6.69 (t, *J* = 7.3 Hz, 1H), 6.62 (d, *J* = 8.0 Hz, 2H), 4.25 (s, 2H), 3.99 (dd, *J* = 8.4, 4.8 Hz, 1H), 3.86 (d, *J* = 13.2 Hz, 1H), 3.63 – 3.51 (m, 2H), 3.41 (dd, *J* = 13.4, 4.8 Hz, 1H).

<sup>13</sup>C NMR (125 MHz, CDCl<sub>3</sub>) δ 148.1, 141.8, 140.2, 129.3, 128.8, 128.4, 128.2, 127.7, 127.3, 127.0, 117.7, 113.2, 61.4, 51.3, 50.7.

HRMS (ESI+) calcd for  $C_{21}H_{23}N_2$  (M+H)<sup>+</sup>, m/z 303.1856, found 303.1860.

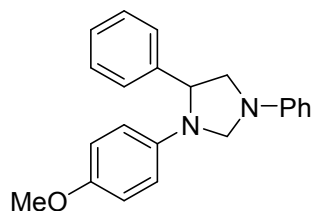

**3-(4-methoxyphenyl)-1,4-diphenylimidazolidine (5a)**

White solid, yield (74%), mp. = 102.8 – 104.4 °C;

<sup>1</sup>H NMR (500 MHz, CDCl<sub>3</sub>) δ 7.38 – 7.35 (m, 2H), 7.33 – 7.23 (m, 5H), 6.82 – 6.76 (m, 3H), 6.68 – 6.65 (m, 2H), 6.57 – 6.54 (m, 2H), 5.16 (d, *J* = 3.1 Hz, 1H), 4.90 (dd, *J* = 7.3, 5.0 Hz, 1H), 4.69 (d, *J* = 3.1 Hz, 1H), 3.93 (dd, *J* = 8.6, 7.3 Hz, 1H), 3.71 (s, 3H), 3.49 (dd, *J* = 8.7, 5.0 Hz, 1H).

<sup>13</sup>C NMR (125 MHz, CDCl<sub>3</sub>) δ 152.2, 146.4, 142.3, 140.1, 129.3, 128.8, 127.5, 126.2, 118.0, 114.8, 114.3, 112.9, 68.5, 62.4, 56.3, 55.7.

HRMS (ESI+) calcd for  $C_{22}H_{23}N_2O$  (M+H)<sup>+</sup>, m/z 331.1805, found 331.1806.

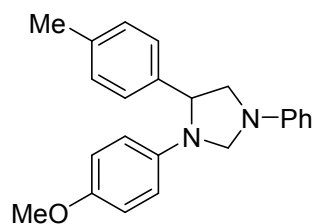

**3-(5-methoxyphenyl)-1-phenyl-4-(m-tolyl)imidazolidine (5b)**

White solid, yield (57%), mp. = 66.8 – 68.6 °C;

<sup>1</sup>H NMR (500 MHz, CDCl<sub>3</sub>) δ 7.29 – 7.25 (m, 4H), 7.13 – 7.12 (d, *J* = 7.9 Hz, 2H), 6.82 – 6.76 (m, 3H), 6.66 (d, *J* = 8.0 Hz, 2H), 6.58 – 6.55 (dd, *J* = 9.7, 2.8 Hz, 2H), 5.15 (d, *J* = 3.1 Hz, 1H), 4.87 (dd, *J* = 7.0, 5.2 Hz, 1H), 4.68 (d, *J* = 3.1 Hz, 1H), 3.91 (dd, *J* = 8.4, 7.5 Hz, 1H), 3.71 (s, 3H), 3.46 (dd, *J* = 8.6, 5.1 Hz, 1H), 2.32 (s, 3H).

<sup>13</sup>C NMR (125 MHz, CDCl<sub>3</sub>) δ 152.1, 146.5, 140.2, 139.3, 137.1, 129.5, 129.3, 126.2, 117.9, 114.8, 114.3, 112.9, 68.5, 62.2, 56.4, 55.7, 21.1.

HRMS (ESI+) calcd for C<sub>23</sub>H<sub>25</sub>N<sub>2</sub>O (M+H)<sup>+</sup>, *m/z* 345.1961, found 345.1956.

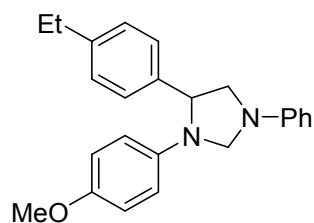

**4-(4-ethylphenyl)-3-(4-methoxyphenyl)-1-phenylimidazolidine (5c)**

White solid, yield (52%), mp. = 75.7 – 77.6 °C;

<sup>1</sup>H NMR (500 MHz, CDCl<sub>3</sub>) δ 7.28 – 7.25 (m, 4H), 7.14 (d, *J* = 7.9 Hz, 2H), 6.81 – 6.77 (m, 3H), 6.66 – 6.65 (m, 2H), 6.58 – 6.56 (m, 2H), 5.15 (d, *J* = 3.1 Hz, 1H), 4.87 (dd, *J* = 7.0, 5.2 Hz, 1H), 4.68 (d, *J* = 3.1 Hz, 1H), 3.92 – 3.89 (m, 1H), 3.71 (s, 3H), 3.48 (dd, *J* = 8.6, 5.0 Hz, 1H), 2.62 (q, *J* = 7.6 Hz, 2H), 1.21 (t, *J* = 7.6 Hz, 3H).

<sup>13</sup>C NMR (125 MHz, CDCl<sub>3</sub>) δ 152.1, 146.5, 143.5, 140.3, 139.5, 129.3, ~~129.0~~, 128.3, 126.2, 117.9, 114.8, 114.3, 112.9, 68.5, 62.2, 56.4, 55.7, 28.5, 15.5.

HRMS (ESI+) calcd for C<sub>24</sub>H<sub>27</sub>N<sub>2</sub>O (M+H)<sup>+</sup>, *m/z* 359.2118, found 359.2110

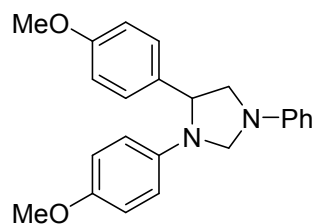

**3,4-bis(4-methoxyphenyl)-1-phenylimidazolidine (5d)**

White solid, yield (75%), mp. = 104.6 – 106.5 °C;

<sup>1</sup>H NMR (500 MHz, CDCl<sub>3</sub>) δ 7.30 – 7.26 (m, 4H), 6.86 (d, *J* = 8.5 Hz, 2H), 6.82 – 6.76 (m, 3H), 6.66 (d, *J* = 8.0 Hz, 2H), 6.59 – 6.55 (m, 2H), 5.15 (d, *J* = 3.1 Hz, 1H), 4.86 (dd, *J* = 7.2, 5.1 Hz, 1H), 4.68 (d, *J* = 3.1 Hz, 1H), 3.91 (dd, *J* = 8.5, 7.3 Hz, 1H), 3.78 (s, 3H), 3.72 (s, 3H), 3.46 (dd, *J* = 8.7, 5.1 Hz, 1H).

<sup>13</sup>C NMR (125 MHz, CDCl<sub>3</sub>) δ 158.9, 152.1, 146.4, 140.2, 134.26, 129.3, 127.3, 117.9, 114.8, 114.37, 114.2, 112.8, 68.4, 61.9, 56.4, 55.7, 55.3.

HRMS (ESI<sup>+</sup>) calcd for C<sub>23</sub>H<sub>25</sub>N<sub>2</sub>O<sub>2</sub> (M+H)<sup>+</sup>, *m/z* 361.1911, found 361.1916.

HRMS (ESI<sup>+</sup>) calcd for C<sub>22</sub>H<sub>22</sub>FN<sub>2</sub>O (M+H)<sup>+</sup>, *m/z* 349.1711, found 349.1717.

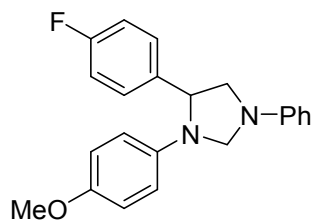

**4-(4-fluorophenyl)-3-(4-methoxyphenyl)-1-phenylimidazolidine (5e)**

White solid, yield (58%), mp. = 89.9 – 91.9 °C;

<sup>1</sup>H NMR (500 MHz, CDCl<sub>3</sub>) δ 7.35 – 7.32 (m, 2H), 7.29 – 7.26 (m, 2H), 7.01 – 6.98 (t, *J* = 8.6 Hz, 2H), 6.83– 6.77 (m, 3H), 6.66 (d, *J* = 7.9 Hz, 2H), 6.54 (d, *J* = 9.0 Hz, 2H), 5.15 (d, *J* = 3.1 Hz, 1H), 4.87 (dd, *J* = 7.0, 5.1 Hz, 1H), 4.66 (d, *J* = 3.1 Hz, 1H), 3.94 – 3.82 (m, 1H), 3.71 (s, 3H), 3.44 (dd, *J* = 8.7, 4.9 Hz, 1H).

<sup>13</sup>C NMR (125 MHz, CDCl<sub>3</sub>) δ 162.2 (d, *J* = 244.0 Hz), 152.3, 146.4, 139.9, 138.0 (d, *J* = 3.0 Hz), 129.4, 127.8 (d, *J* = 8.0 Hz), 118.2, 115.8 (d, *J* = 21.3 Hz), 114.9, 114.4, 113.0, 68.5, 61.8, 56.3, 55.7.

<sup>19</sup>F NMR (470 MHz, CDCl<sub>3</sub>) δ -115.07.

HRMS (ESI<sup>+</sup>) calcd for C<sub>22</sub>H<sub>22</sub>FN<sub>2</sub>O (M+H)<sup>+</sup>, *m/z* 349.1711, found 349.1714.

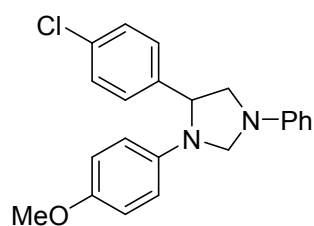

**4-(4-chlorophenyl)-3-(4-methoxyphenyl)-1-phenylimidazolidine (5f)**

White solid, yield (55%), mp. = 129.9 – 130.9 °C;

<sup>1</sup>H NMR (500 MHz, CDCl<sub>3</sub>) δ 7.31 – 7.26 (m, 6H), 6.83 – 6.77 (m, 3H), 6.66 (d, *J* = 8.1 Hz, 2H), 6.54 – 6.51 (m, 2H), 5.14 (d, *J* = 3.1 Hz, 1H), 4.85 (dd, *J* = 7.2, 4.9 Hz, 1H), 4.66 (d, *J* = 3.1 Hz, 1H), 3.91 – 3.88 (m, 1H), 3.71 (s, 3H), 3.44 (dd, *J* = 8.7, 4.9 Hz, 1H).

<sup>13</sup>C NMR (125 MHz, CDCl<sub>3</sub>) δ 152.4, 146.3, 140.9, 139.8, 133.2, 129.4, 129.0, 127.7, 118.3, 114.9, 114.4, 113.0, 68.5, 61.8, 56.2, 55.8.

HRMS (ESI<sup>+</sup>) calcd for C<sub>22</sub>H<sub>22</sub>ClN<sub>2</sub>O (M+H)<sup>+</sup>, *m/z* 365.1415, found 365.1411.

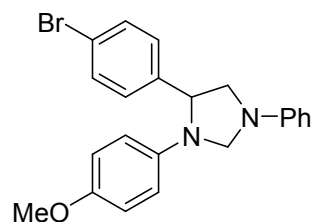

**4-(4-bromophenyl)-3-(4-methoxyphenyl)-1-phenylimidazolidine (5g)**

White solid, yield (53%), mp. = 138.4 – 140.6 °C;

<sup>1</sup>H NMR (500 MHz, CDCl<sub>3</sub>) δ 7.45 – 7.43 (m, 2H), 7.30 – 7.25 (m, 4H), 6.84 – 6.77 (m, 3H), 6.66 (d, *J* = 8.2 Hz, 2H), 6.55 – 6.51 (m, 2H), 5.15 (d, *J* = 3.1 Hz, 1H), 4.85 (dd, *J* = 7.2, 4.9 Hz, 1H), 4.67 (d, *J* = 3.1 Hz, 1H), 3.92 – 3.89 (m, 1H), 3.72 (s, 3H), 3.45 (dd, *J* = 8.7, 4.9 Hz, 1H).

<sup>13</sup>C NMR (125 MHz, CDCl<sub>3</sub>) δ 152.4, 146.3, 141.5, 139.8, 132.0, 129.4, 128.0, 121.3, 118.3, 114.9, 114.3, 113.0, 68.4, 61.9, 56.1, 55.7.

HRMS (ESI<sup>+</sup>) calcd for C<sub>22</sub>H<sub>22</sub>BrN<sub>2</sub>O (M+H)<sup>+</sup>, *m/z* 409.0910, found 409.1913.

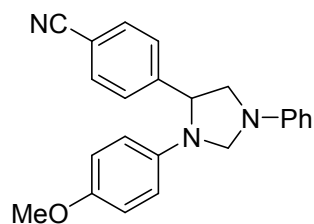

**4-(3-(4-methoxyphenyl)-1-phenylimidazolidin-4-yl)benzonitrile (5h)**

White solid, yield (74%), mp. = 142.0 – 142.4;

$^1\text{H NMR}$  (500 MHz,  $\text{CDCl}_3$ )  $\delta$  7.63 (d,  $J = 7.9$  Hz, 2H), 7.50 (d,  $J = 8.1$  Hz, 2H), 7.29 (t,  $J = 7.6$  Hz, 2H), 6.86 – 6.79 (m, 3H), 6.68 (d,  $J = 8.5$  Hz, 2H), 6.50 (d,  $J = 8.7$  Hz, 2H), 5.18 (d,  $J = 2.8$  Hz, 1H), 4.95 (dd,  $J = 7.2, 4.6$  Hz, 1H), 4.68 (d,  $J = 2.8$  Hz, 1H), 3.94 (t,  $J = 8.0$  Hz, 1H), 3.73 (s, 3H), 3.48 (dd,  $J = 8.6, 4.5$  Hz, 1H).

$^{13}\text{C NMR}$  (125 MHz,  $\text{CDCl}_3$ )  $\delta$  152.6, 148.1, 146.2, 139.4, 132.8, 129.4, 127.1, 118.7, 118.6, 115.0, 114.2, 113.1, 111.5, 68.4, 62.0, 55.8, 55.7.

HRMS (ESI+) calcd for  $\text{C}_{23}\text{H}_{22}\text{N}_3\text{O}$  ( $\text{M}+\text{H}$ ) $^+$ ,  $m/z$  356.1757, found 356.1755.

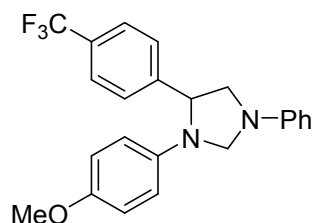

**3-(4-methoxyphenyl)-1-phenyl-4-(4-(trifluoromethyl)phenyl)imidazolidine (5i)**

White solid, yield (52%), mp. = 105.7 – 117.1 °C;

$^1\text{H NMR}$  (500 MHz,  $\text{CDCl}_3$ )  $\delta$  7.58 (d,  $J = 8.2$  Hz, 2H), 7.49 (d,  $J = 8.1$  Hz, 2H), 7.29 (t,  $J = 7.9$  Hz, 2H), 6.85 – 6.78 (m, 3H), 6.67 (d,  $J = 8.1$  Hz, 2H), 6.54 – 6.51 (m, 2H), 5.19 (d,  $J = 3.1$  Hz, 1H), 4.96 (dd,  $J = 7.2, 4.8$  Hz, 1H), 4.69 (d,  $J = 3.1$  Hz, 1H), 3.94 (dd,  $J = 8.5, 7.6$  Hz, 1H), 3.72 (s, 3H), 3.48 (dd,  $J = 8.7, 4.7$  Hz, 1H).

$^{13}\text{C NMR}$  (125 MHz,  $\text{CDCl}_3$ )  $\delta$  151.4, 145.5, 145.2, 138.6, 128.8 (q,  $J = 32.2$  Hz), 128.4, 125.6, 124.8 (q,  $J = 3.8$  Hz), 123.1 (q,  $J = 270.4$  Hz), 117.4, 113.9, 113.2, 112.0, 67.4, 60.9, 55.0, 54.7.

$^{19}\text{F NMR}$  (471 MHz,  $\text{CDCl}_3$ )  $\delta$  -62.43.

HRMS (ESI+) calcd for  $\text{C}_{23}\text{H}_{21}\text{F}_3\text{N}_2\text{O}$  ( $\text{M}+\text{H}$ ) $^+$ ,  $m/z$  399.1679, found 399.1674.

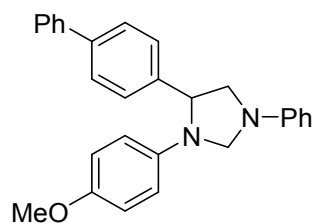

**4-([1,1'-biphenyl]-4-yl)-3-(4-methoxyphenyl)-1-phenylimidazolidine (5j)**

White solid, yield (76%), mp. = 132.9 – 134.1 °C;

<sup>1</sup>H NMR (500 MHz, CDCl<sub>3</sub>) δ 7.56 – 7.53 (m, 4H), 7.44 – 7.39 (m, 4H), 7.33 – 7.26 (m, 3H), 6.83 – 6.78 (m, 3H), 6.67 (d, *J* = 8.0 Hz, 2H), 6.61 – 6.57 (m, 2H), 5.18 (d, *J* = 3.1 Hz, 1H), 4.93 (dd, *J* = 7.1, 5.1 Hz, 1H), 4.70 (d, *J* = 3.1 Hz, 1H), 3.96 – 3.92 (m, 1H), 3.71 (s, 3H), 3.52 (dd, *J* = 8.7, 5.0 Hz, 1H).

<sup>13</sup>C NMR (125 MHz, CDCl<sub>3</sub>) δ 152.2, 146.5, 141.5, 140.8, 140.5, 140.2, 129.4, 128.8, 127.6, 127.3, 127.1, 126.7, 118.1, 114.9, 114.4, 113.0, 68.5, 62.2, 56.3, 55.8.

HRMS (ESI<sup>+</sup>) calcd for C<sub>28</sub>H<sub>27</sub>N<sub>2</sub>O (M+H)<sup>+</sup>, *m/z* 407.2118, found 407.2110.

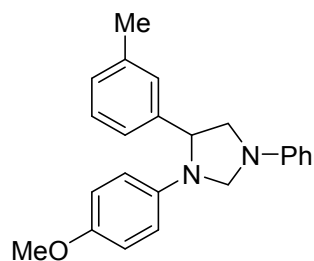

**3-(4-methoxyphenyl)-1-phenyl-4-(m-tolyl)imidazolidine (5k)**

White solid, yield (55%), mp. = 96.6 – 97.5 °C;

<sup>1</sup>H NMR (500 MHz, CDCl<sub>3</sub>) δ 7.29 – 7.26 (m, 2H), 7.22 – 7.16 (m, 3H), 7.07 – 7.06 (m, 1H), 6.82 – 6.77 (m, 3H), 6.66 (d, *J* = 7.8 Hz, 2H), 6.58 – 6.55 (m, 2H), 5.16 (d, *J* = 3.1 Hz, 1H), 4.85 (dd, *J* = 7.3, 5.2 Hz, 1H), 4.68 (d, *J* = 3.1 Hz, 1H), 3.91 (dd, *J* = 8.5, 7.5 Hz, 1H), 3.72 (s, 3H), 3.48 (dd, *J* = 8.7, 5.1 Hz, 1H), 2.32 (s, 3H).

<sup>13</sup>C NMR (125 MHz, CDCl<sub>3</sub>) δ 152.1, 146.5, 142.4, 140.3, 138.5, 129.3, 128.7, 128.3, 126.8, 123.3, 118.0, 114.8, 114.3, 112.9, 68.5, 62.5, 56.4, 55.8, 21.6.

HRMS (ESI<sup>+</sup>) calcd for C<sub>23</sub>H<sub>25</sub>N<sub>2</sub>O (M+H)<sup>+</sup>, *m/z* 345.1961, found 345.1964.

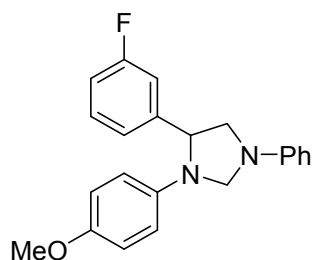

**4-(3-fluorophenyl)-3-(4-methoxyphenyl)-1-phenylimidazolidine (5l)**

White solid, yield (38%), mp. = 99.8 – 101.4 °C;

<sup>1</sup>H NMR (500 MHz, CDCl<sub>3</sub>) δ 7.31 – 7.27 (m, 3H), 7.16 (d, *J* = 7.7 Hz, 1H), 7.10 – 7.07 (m, 1H), 6.96 – 6.92 (m, 1H), 6.84 – 6.78 (m, 3H), 6.67 (d, *J* = 7.8 Hz, 2H), 6.56 – 6.53 (m, 2H), 5.17 (d, *J* = 3.1 Hz, 1H), 4.89 (dd, *J* = 7.3, 4.8 Hz, 1H), 4.67 (d, *J* = 3.1 Hz, 1H), 3.92 (dd, *J* = 8.6, 7.5 Hz, 1H), 3.73 (s, 3H), 3.49 (dd, *J* = 8.7, 4.8 Hz, 1H).

<sup>13</sup>C NMR (125 MHz, CDCl<sub>3</sub>) δ 163.3 (d, *J* = 245.0 Hz), 152.3, 146.3, 145.32 (d, *J* = 6.3 Hz), 139.8, 130.4 (d, *J* = 8.1 Hz), 129.4, 121.8, 118.3, 114.9, 114.5 (d, *J* = 21.1 Hz), 114.2, 113.2 (d, *J* = 21.8 Hz), 113.0, 68.4, 61.9, 56.1, 55.7.

<sup>19</sup>F NMR (471 MHz, CDCl<sub>3</sub>) δ -112.37.

HRMS (ESI<sup>+</sup>) calcd for C<sub>22</sub>H<sub>22</sub>FN<sub>2</sub>O (M+H)<sup>+</sup>, *m/z* 349.1711, found 349.1714.

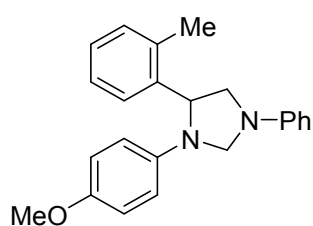

**3-(4-methoxyphenyl)-1-phenyl-4-(o-tolyl)imidazolidine (5m)**

White solid, yield (55%), mp. = 147.7 – 148.6 °C;

<sup>1</sup>H NMR (500 MHz, CDCl<sub>3</sub>) δ 7.29 – 7.25 (m, 3H), 7.20 – 7.19 (m, 1H), 7.16 – 7.13 (m, 1H), 7.11 – 7.08 (m, 1H), 6.81 – 6.76 (m, 3H), 6.66 (d, *J* = 8.0 Hz, 2H), 6.48 – 6.44 (m, 2H), 5.19 (d, *J* = 3.1 Hz, 1H), 5.08 (dd, *J* = 7.4, 5.0 Hz, 1H), 4.69 (d, *J* = 3.1 Hz, 1H), 3.97 – 3.94 (m, 1H), 3.71 (s, 3H), 3.42 (dd, *J* = 8.5, 4.9 Hz, 1H), 2.48 (s, 3H).

$^{13}\text{C}$  NMR (125 MHz,  $\text{CDCl}_3$ )  $\delta$  152.1, 146.5, 140.1, 139.8, 134.3, 130.7, 129.3, 127.2, 126.7, 125.8, 118.0, 114.9, 114.0, 112.9, 68.3, 59.4, 55.8, 54.8, 19.5.

HRMS (ESI+) calcd for  $\text{C}_{23}\text{H}_{25}\text{N}_2\text{O}$  ( $\text{M}+\text{H}$ ) $^+$ ,  $m/z$  345.1961, found 345.1968.

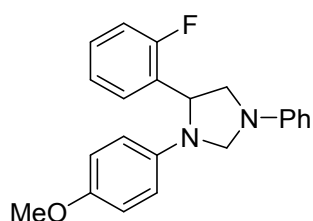

**4-(2-fluorophenyl)-3-(4-methoxyphenyl)-1-phenylimidazolidine (5n)**

White solid, yield (56%), mp. = 86.7 – 88.4 °C;

$^1\text{H}$  NMR (500 MHz,  $\text{CDCl}_3$ )  $\delta$  7.22 – 7.13 (m, 4H), 7.03 – 6.99 (dd,  $J$  = 9.8, 8.9 Hz, 1H), 6.96 – 6.93 (m, 1H), 6.76 – 6.72 (m, 3H), 6.61 (d,  $J$  = 7.9 Hz, 2H), 6.49 – 6.45 (m, 2H), 5.20 (dd,  $J$  = 7.3, 3.8 Hz, 1H), 5.09 (d,  $J$  = 3.1 Hz, 1H), 4.59 (d,  $J$  = 3.1 Hz, 1H), 3.89 – 3.86 (m, 1H), 3.66 (s, 3H), 3.49 (dd,  $J$  = 8.7, 3.8 Hz, 1H).

$^{13}\text{C}$  NMR (125 MHz,  $\text{CDCl}_3$ )  $\delta$  159.3 (d,  $J$  = 243.3 Hz), 151.2, 145.4, 138.6, 128.3, 128.0 (d,  $J$  = 12.8 Hz), 127.9 (d,  $J$  = 8.0 Hz), 126.8 ( $J$  = 4.2 Hz), 123.4 (d,  $J$  = 3.4 Hz), 117.2, 114.3 (d,  $J$  = 21.0 Hz), 113.9, 112.7, 112.0, 66.7, 54.7, 54.5, 53.8.

$^{19}\text{F}$  NMR (471 MHz,  $\text{CDCl}_3$ )  $\delta$  -119.45.

HRMS (ESI+) calcd for  $\text{C}_{22}\text{H}_{22}\text{FN}_2\text{O}$  ( $\text{M}+\text{H}$ ) $^+$ ,  $m/z$  349.1711, found 349.1717.

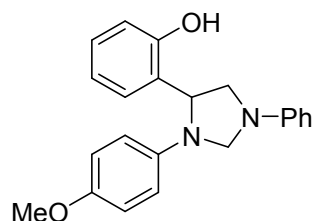

**2-(3-(4-methoxyphenyl)-1-phenylimidazolidin-4-yl)phenol (5o)**

White solid, yield (65%), mp. = 138.2 – 140.0 °C;

$^1\text{H}$  NMR (500 MHz,  $\text{CDCl}_3$ )  $\delta$  9.39 (s, 1H), 7.30 – 7.27 (m, 2H), 7.22 – 7.17 (m, 2H), 6.96 – 6.93 (m, 2H), 6.88 (td,  $J$  = 7.5, 0.6 Hz, 1H), 6.84 – 6.79 (m, 4H), 6.62 (d,  $J$  = 8.0 Hz, 2H), 5.13 (d,  $J$  = 3.9 Hz, 1H), 4.84 – 4.81 (m, 1H), 4.48 (d,  $J$  = 3.9 Hz, 1H), 3.91 (dd,  $J$  = 8.8, 7.6 Hz, 1H), 3.73 (s, 3H), 3.70 –



3.66 (m, 1H)..

$^{13}\text{C}$  NMR (125 MHz,  $\text{CDCl}_3$ )  $\delta$  155.4, 154.2, 144.6, 138.6, 128.4, 128.4, 127.5, 121.8, 118.8, 117.9, 117.2, 116.2, 113.7, 111.6, 69.7, 63.7, 54.5, 52.9.

HRMS (ESI+) calcd for  $\text{C}_{22}\text{H}_{23}\text{N}_2\text{O}_2$  ( $\text{M}+\text{H}$ ) $^+$ ,  $m/z$  347.1754, found 347.1755.

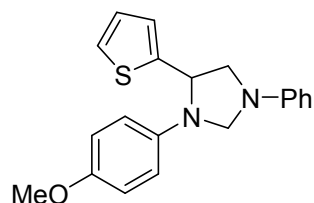

**3-(4-methoxyphenyl)-1-phenyl-4-(thiophen-2-yl)imidazolidine (5p)**

Yellow solid, yield (57%), mp. = 117.8 – 119.0 °C;

$^1\text{H}$  NMR (500 MHz,  $\text{CDCl}_3$ )  $\delta$  7.29 – 7.26 (m, 2H), 7.14 (dd,  $J$  = 5.0, 1.0 Hz, 1H), 7.02 (d,  $J$  = 3.4 Hz, 1H), 6.91 (dd,  $J$  = 5.0, 3.5 Hz, 1H), 6.83 – 6.79 (m, 3H), 6.67 – 6.64 (m, 4H), 5.22 (dd,  $J$  = 6.8, 3.9 Hz, 1H), 5.04 (d,  $J$  = 3.2 Hz, 1H), 4.61 (d,  $J$  = 3.2 Hz, 1H), 3.86 (dd,  $J$  = 8.6, 6.9 Hz, 1H), 3.72 (s, 3H), 3.63 (dd,  $J$  = 8.6, 3.9 Hz, 1H).

$^{13}\text{C}$  NMR (125 MHz,  $\text{CDCl}_3$ )  $\delta$  152.5, 146.5, 146.3, 139.7, 129.4, 126.7, 124.7, 124.3, 118.1, 114.8, 114.6, 112.9, 67.4, 58.1, 56.1, 55.7.

HRMS (ESI+) calcd for  $\text{C}_{20}\text{H}_{21}\text{N}_2\text{OS}$  ( $\text{M}+\text{H}$ ) $^+$ ,  $m/z$  337.1369, found 337.1366.

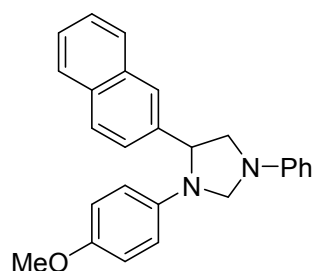

**3-(4-methoxyphenyl)-4-(naphthalen-2-yl)-1-phenylimidazolidine (5q)**

White solid, yield (70%), mp. = 148.0 – 150.0 °C;

$^1\text{H}$  NMR (500 MHz,  $\text{CDCl}_3$ )  $\delta$  7.83 – 7.78 (m, 4H), 7.51 – 7.49 (dd,  $J$  = 8.5, 1.3 Hz, 1H), 7.47 – 7.42 (m, 2H), 7.28 (t,  $J$  = 7.9 Hz, 2H), 6.81 (t,  $J$  = 7.3 Hz, 1H), 6.76 – 6.74 (m, 2H), 6.67 (d,  $J$  = 8.3 Hz, 2H), 6.61 (d,  $J$  = 9.0 Hz, 2H), 5.24 (d,  $J$  = 3.1 Hz, 1H), 5.04 (dd,  $J$  = 7.2, 5.4 Hz, 1H), 4.73 (d,  $J$  = 3.1 Hz, 1H),

4.00 – 3.97 (m, 1H), 3.68 (s, 3H), 3.55 (dd,  $J = 8.7, 5.2$  Hz, 1H)

$^{13}\text{C}$  NMR (125 MHz,  $\text{CDCl}_3$ )  $\delta$  152.2, 146.4, 140.3, 140.0, 133.5, 133.1, 129.4, 128.9, 127.9, 127.8, 126.2, 125.8, 125.1, 124.3, 118.1, 114.8, 114.4, 113.0, 68.6, 62.7, 56.3, 55.7.

HRMS (ESI+) calcd for  $\text{C}_{26}\text{H}_{25}\text{N}_2\text{O}$  ( $\text{M}+\text{H}$ ) $^+$ ,  $m/z$  381.1961, found 381.1964.

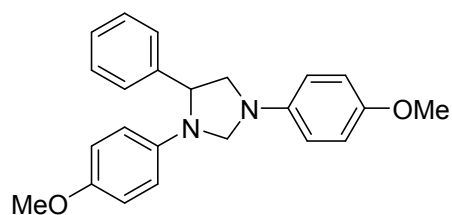

**1,3-bis(4-methoxyphenyl)-4-phenylimidazolidine (5r)<sup>7</sup>**

White solid, yield (77%), mp. = 113.7 – 115.5 °C;

$^1\text{H}$  NMR (500 MHz,  $\text{CDCl}_3$ )  $\delta$  7.39 – 7.37 (m, 2H), 7.32 (t,  $J = 7.5$  Hz, 2H), 7.27 – 7.23 (m, 1H), 6.88 – 6.85 (m, 2H), 6.78 – 6.77 (m, 2H), 6.65 – 6.64 (m, 2H), 6.55 – 6.52 (m, 2H), 5.10 (d,  $J = 3.0$  Hz, 1H), 4.88 (dd,  $J = 7.1, 4.9$  Hz, 1H), 4.64 (d,  $J = 3.0$  Hz, 1H), 3.84 (dd,  $J = 8.3, 7.5$  Hz, 1H), 3.76 (s, 3H), 3.71 (s, 3H), 3.44 (dd,  $J = 8.5, 4.8$  Hz, 1H).

$^{13}\text{C}$  NMR (125 MHz,  $\text{CDCl}_3$ )  $\delta$  152.6, 152.0, 142.5, 141.3, 140.3, 128.8, 127.4, 126.3, 114.9, 114.8, 114.3, 114.0, 69.2, 62.6, 57.2, 55.8, 55.8.

HRMS (ESI+) calcd for  $\text{C}_{23}\text{H}_{25}\text{N}_2\text{O}_2$  ( $\text{M}+\text{H}$ ) $^+$ ,  $m/z$  361.1911, found 361.1919.

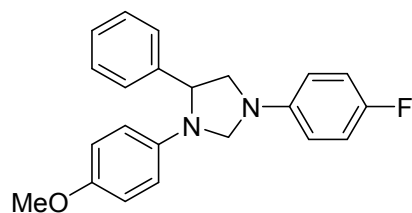

**1-(4-fluorophenyl)-3-(4-methoxyphenyl)-4-phenylimidazolidine (5s)**

Yellow oil, yield (40%);

$^1\text{H}$  NMR (500 MHz,  $\text{CDCl}_3$ )  $\delta$  7.38 – 7.36 (m, 2H), 7.34 – 7.31 (M, 2H), 7.27 – 7.24 (M, 1H), 7.00 – 6.96 (m, 2H), 6.79 – 6.76 (m, 2H), 6.61 – 6.59 (m, 2H), 6.56 – 6.53 (m, 2H), 5.11 (d,  $J = 3.0$  Hz, 1H), 4.90 (dd,  $J = 7.2, 5.0$  Hz, 1H), 4.65 (d,  $J = 3.0$  Hz, 1H), 3.87 (dd,  $J = 8.4, 7.5$  Hz, 1H), 3.71 (s, 3H), 3.44 (dd,

$J = 8.5, 5.0$  Hz, 1H).

$^{13}\text{C}$  NMR (125 MHz,  $\text{CDCl}_3$ )  $\delta$  156.2 (d,  $J = 3.0$  Hz), 152.2, 143.2, 142.2, 140.1, 128.9, 127.5, 126.2, 115.8 (d,  $J = 22.2$  Hz), 114.8, 114.2, 113.8 (d,  $J = 7.4$  Hz), 69.0, 62.5, 56.9, 55.7.

$^{19}\text{F}$  NMR (471 MHz,  $\text{CDCl}_3$ )  $\delta$  -127.3.

HRMS (ESI+) calcd for  $\text{C}_{22}\text{H}_{22}\text{FN}_2\text{O}$  ( $\text{M}+\text{H}$ ) $^+$ ,  $m/z$  349.1711, found 349.1705.

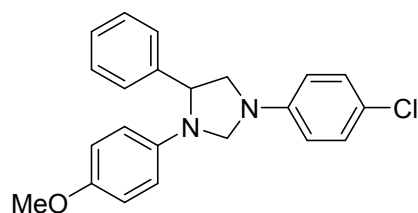

**1-(4-chlorophenyl)-3-(4-methoxyphenyl)-4-phenylimidazolidine (5t)**

White solid, yield (36%), mp. = 119.9 – 121.4 °C;

$^1\text{H}$  NMR (500 MHz,  $\text{CDCl}_3$ )  $\delta$  7.37 – 7.31 (m, 4H), 7.26 – 7.20 (m, 3H), 6.79 – 6.76 (m, 2H), 6.58 – 6.54 (m, 4H), 5.12 (d,  $J = 3.1$  Hz, 1H), 4.90 (dd,  $J = 7.2, 5.2$  Hz, 1H), 4.66 (d,  $J = 3.1$  Hz, 1H), 3.92 – 3.89 (m, 1H), 3.72 (s, 3H), 3.45 (dd,  $J = 8.6, 5.1$  Hz, 1H).

$^{13}\text{C}$  NMR (125 MHz,  $\text{CDCl}_3$ )  $\delta$  152.3, 144.9, 142.0, 140.0, 129.2, 128.9, 127.6, 126.2, 122.9, 114.8, 114.4, 113.9, 68.5, 62.4, 56.4, 55.7.

HRMS (ESI+) calcd for  $\text{C}_{22}\text{H}_{22}\text{ClN}_2\text{O}$  ( $\text{M}+\text{H}$ ) $^+$ ,  $m/z$  365.1415, found 365.1411.

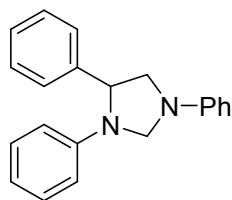

**1,3,4-triphenylimidazolidine (5u)**

White solid, yield (76%), mp. = 110.8 – 112.1 °C;

$^1\text{H}$  NMR (500 MHz,  $\text{CDCl}_3$ )  $\delta$  7.36 – 7.24 (m, 7H), 7.20 – 7.17 (m, 2H), 6.82 (t,  $J = 7.3$  Hz, 1H), 6.73 (t,  $J = 7.3$  Hz, 1H), 6.69 (d,  $J = 7.9$  Hz, 2H), 6.59 (d,  $J = 8.0$  Hz, 2H), 5.19 (d,  $J = 3.3$  Hz, 1H), 4.99 (dd,  $J = 7.3, 4.0$  Hz, 1H), 4.74 (d,  $J = 3.3$  Hz, 1H), 3.92 – 3.89 (m, 1H), 3.55 (dd,  $J = 8.7, 4.0$  Hz, 1H).

---

$^{13}\text{C}$  NMR (125 MHz,  $\text{CDCl}_3$ )  $\delta$  146.5, 145.3, 142.4, 129.4, 129.2, 128.9, 127.5, 126.2, 118.3, 117.5, 113.2, 112.8, 67.5, 61.8, 56.2.

HRMS (ESI+) calcd for  $\text{C}_{21}\text{H}_{21}\text{N}_2$  ( $\text{M}+\text{H}$ ) $^+$ ,  $m/z$  301.1699, found 301.1699.

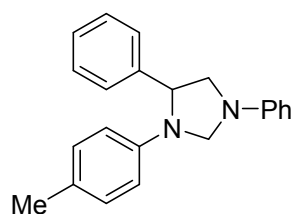

**1,4-diphenyl-3-(p-tolyl)imidazolidine (5v)**

White solid, yield (75%), mp. = 120.1 – 121.7 °C;

$^1\text{H}$  NMR (500 MHz,  $\text{CDCl}_3$ )  $\delta$  7.36 – 7.26 (m, 7H), 6.99 (d,  $J$  = 8.2 Hz, 2H), 6.81 (t,  $J$  = 7.3 Hz, 1H), 6.68 (d,  $J$  = 7.8 Hz, 2H), 6.52 – 6.50 (m, 2H), 5.18 (d,  $J$  = 3.2 Hz, 1H), 4.95 (dd,  $J$  = 7.3, 4.4 Hz, 1H), 4.72 (d,  $J$  = 3.2 Hz, 1H), 3.92 (dd,  $J$  = 8.6, 7.5 Hz, 1H), 3.52 (dd,  $J$  = 8.7, 4.4 Hz, 1H), 2.22 (s, 3H).

$^{13}\text{C}$  NMR (125 MHz,  $\text{CDCl}_3$ )  $\delta$  146.5, 143.3, 142.5, 129.7, 129.3, 128.8, 127.5, 126.7, 126.2, 118.1, 113.0, 113.0, 67.9, 61.9, 56.2, 20.3.

HRMS (ESI+) calcd for  $\text{C}_{22}\text{H}_{23}\text{N}_2$  ( $\text{M}+\text{H}$ ) $^+$ ,  $m/z$  315.1856, found 315.1862.

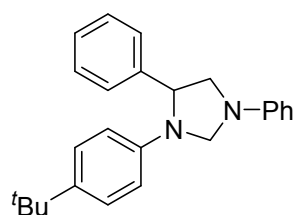

**3-(4-(tert-butyl)phenyl)-1,4-diphenylimidazolidine (5w)**

White solid, yield (87%), mp. = 148.4 – 150.3 °C;

$^1\text{H}$  NMR (500 MHz,  $\text{CDCl}_3$ )  $\delta$  7.40 – 7.38 (m, 2H), 7.35 – 7.26 (m, 5H), 7.24 – 7.21 (m, 2H), 6.82 (t,  $J$  = 7.3 Hz, 1H), 6.69 (d,  $J$  = 7.8 Hz, 2H), 6.57 – 6.55 (m, 2H), 5.21 (d,  $J$  = 3.2 Hz, 1H), 4.96 (dd,  $J$  = 7.4, 4.3 Hz, 1H), 4.73 (d,  $J$  = 3.2 Hz, 1H), 3.90 (dd,  $J$  = 8.6, 7.6 Hz, 1H), 3.54 (dd,  $J$  = 8.7, 4.3 Hz, 1H), 1.26 (s, 9H).

$^{13}\text{C}$  NMR (125 MHz,  $\text{CDCl}_3$ )  $\delta$  146.5, 143.2, 142.7, 140.2, 129.3, 128.8, 127.5, 126.2, 126.0, 118.2, 113.1, 112.5, 67.8, 62.1, 56.3, 33.8, 31.5.

HRMS (ESI+) calcd for  $\text{C}_{25}\text{H}_{29}\text{N}_2$  ( $\text{M}+\text{H}$ ) $^+$ ,  $m/z$  357.2325, found 357.2323.

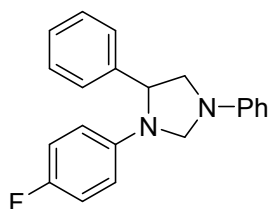

**3-(4-fluorophenyl)-1,4-diphenylimidazolidine (5x)**

White solid, yield (52%), mp. = 89.8 – 91.9 °C;

$^1\text{H}$  NMR (500 MHz,  $\text{CDCl}_3$ )  $\delta$  7.37 – 7.27 (m, 6H), 7.21 – 7.18 (m, 2H), 6.83 (t,  $J$  = 7.3 Hz, 1H), 6.75 – 6.69 (m, 3H), 6.59 (d,  $J$  = 7.9 Hz, 2H), 5.20 (d,  $J$  = 3.3 Hz, 1H), 5.01 (dd,  $J$  = 7.3, 3.9 Hz, 1H), 4.75 (d,  $J$  = 3.3 Hz, 1H), 3.92 (dd,  $J$  = 8.6, 7.5 Hz, 1H), 3.56 (dd,  $J$  = 8.7, 4.0 Hz, 1H)

$^{13}\text{C}$  NMR (125 MHz,  $\text{CDCl}_3$ )  $\delta$  155.9 (d,  $J$  = 234.6 Hz), 146.3, 142.0, 142.0, 129.4, 128.9, 127.6, 126.2, 118.3, 115.6 (d,  $J$  = 22.1 Hz), 113.7 (d,  $J$  = 7.3 Hz), 113.1, 68.1, 62.2, 56.3.

$^{19}\text{F}$  NMR (471 MHz,  $\text{CDCl}_3$ )  $\delta$  -127.89.

HRMS (ESI+) calcd for  $\text{C}_{21}\text{H}_{20}\text{FN}_2$  ( $\text{M}+\text{H}$ ) $^+$ ,  $m/z$  319.1605, found 319.1600.

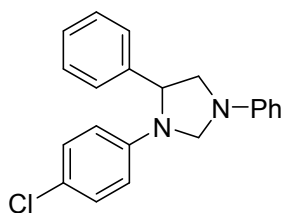

**3-(4-chlorophenyl)-1,4-diphenylimidazolidine (5y)**

White solid, yield (43%), mp. = 112.3 – 113.5 °C;

$^1\text{H}$  NMR (500 MHz,  $\text{CDCl}_3$ )  $\delta$  7.33 – 7.25 (m, 7H), 7.14 – 7.11 (m, 2H), 6.83 (t,  $J$  = 7.3 Hz, 1H), 6.68 (d,  $J$  = 7.8 Hz, 2H), 6.51 – 6.48 (m, 2H), 5.15 (d,  $J$  = 3.3 Hz, 1H), 4.96 (dd,  $J$  = 7.3, 4.1 Hz, 1H), 4.72 (d,  $J$  = 3.3 Hz, 1H), 3.93 (dd,  $J$  = 8.6, 7.4 Hz, 1H), 3.54 (dd,  $J$  = 8.7, 4.1 Hz, 1H)

---

$^{13}\text{C}$  NMR (125 MHz,  $\text{CDCl}_3$ )  $\delta$  146.3, 143.8, 141.9, 129.4, 129.0, 128.9, 127.7, 126.1, 122.5, 118.5, 113.9, 113.2, 67.6, 61.9, 56.2.

HRMS (ESI+) calcd for  $\text{C}_{21}\text{H}_{20}\text{ClN}_2$  ( $\text{M}+\text{H}$ ) $^+$ ,  $m/z$  335.1310, found 335.1314.

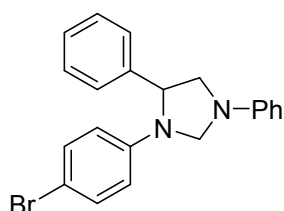

**3-(4-bromophenyl)-1,4-diphenylimidazolidine (5z)**

White solid, yield (43%), mp. = 100.0 – 101.8 °C;

$^1\text{H}$  NMR (500 MHz,  $\text{CDCl}_3$ )  $\delta$  7.37 – 7.26 (m, 7H), 7.21 – 7.17 (m, 2H), 6.83 (t,  $J$  = 7.3 Hz, 1H), 6.75 – 6.69 (m, 3H), 6.59 (d,  $J$  = 7.9 Hz, 2H), 5.20 (d,  $J$  = 3.3 Hz, 1H), 5.01 (dd,  $J$  = 7.3, 3.9 Hz, 1H), 4.75 (d,  $J$  = 3.3 Hz, 1H), 3.92 (dd,  $J$  = 8.5, 7.5 Hz, 1H), 3.56 (dd,  $J$  = 8.7, 4.0 Hz, 1H).

$^{13}\text{C}$  NMR (125 MHz,  $\text{CDCl}_3$ )  $\delta$  146.3, 144.1, 141.8, 131.9, 129.4, 128.9, 127.7, 126.1, 118.5, 114.4, 113.2, 109.6, 67.4, 61.8, 56.1.

HRMS (ESI+) calcd for  $\text{C}_{21}\text{H}_{20}\text{BrN}_2$  ( $\text{M}+\text{H}$ ) $^+$ ,  $m/z$  379.0804, found 379.0806.

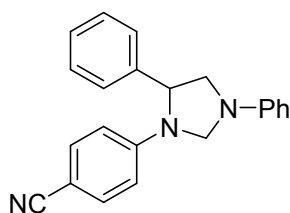

**4-(3,5-diphenylimidazolidin-1-yl)benzonitrile (5aa)**

White solid, yield (52%), mp. = 123.8 – 124.9 °C;

$^1\text{H}$  NMR (500 MHz,  $\text{CDCl}_3$ )  $\delta$  7.36 – 7.23 (m, 2H), 7.31 – 7.24 (m, 4H), 7.20 – 7.17 (m, 2H), 6.82 (t,  $J$  = 7.3 Hz, 1H), 6.73 (t,  $J$  = 7.3 Hz, 1H), 6.69 (d,  $J$  = 8.3 Hz, 2H), 6.59 (d,  $J$  = 8.3 Hz, 2H), 5.20 (d,  $J$  = 3.3 Hz, 1H), 5.00 (dd,  $J$  = 7.3, 4.0 Hz, 1H), 4.75 (d,  $J$  = 3.3 Hz, 1H), 3.93 – 3.90 (m, 1H), 3.55 (dd,  $J$  = 8.7, 4.0 Hz, 1H).

$^{13}\text{C}$  NMR (125 MHz,  $\text{CDCl}_3$ )  $\delta$  146.5, 145.3, 142.4, 129.4, 129.2, 128.8, 127.5, 126.1, 118.3, 117.5, 113.2, 112.8, 67.5, 61.8, 56.2.

HRMS (ESI+) calcd for  $\text{C}_{22}\text{H}_{20}\text{N}_3$  ( $\text{M}+\text{H}$ ) $^+$ ,  $m/z$  326.1652, found 326.1657.

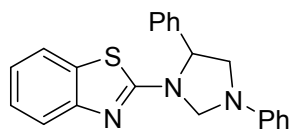

**2-(3,5-diphenylimidazolidin-1-yl)benzo[d]thiazole (5ab)**

White solid, yield (31%), mp. = 110.9 – 112.4 °C;

$^1\text{H}$  NMR (500 MHz,  $\text{CDCl}_3$ )  $\delta$  7.36 – 7.27 (m, 6H), 7.20 – 7.17 (m, 2H), 6.82 (t,  $J$  = 7.3 Hz, 1H), 6.74 (t,  $J$  = 7.3 Hz, 1H), 6.69 (d,  $J$  = 7.9 Hz, 2H), 6.59 (d,  $J$  = 7.9 Hz, 2H), 5.20 (d,  $J$  = 3.3 Hz, 1H), 5.00 (dd,  $J$  = 7.3, 4.0 Hz, 1H), 4.75 (d,  $J$  = 3.3 Hz, 1H), 3.92 (dd,  $J$  = 8.5, 7.5 Hz, 1H), 3.55 (dd,  $J$  = 8.7, 4.0 Hz, 1H)

$^{13}\text{C}$  NMR (125 MHz,  $\text{CDCl}_3$ )  $\delta$  146.5, 145.3, 142.4, 129.4, 129.2, 128.8, 127.5, 126.1, 118.3, 117.5, 113.2, 112.8, 67.5, 61.8, 56.2.

HRMS (ESI+) calcd for  $\text{C}_{22}\text{H}_{20}\text{N}_3\text{S}$  ( $\text{M}+\text{H}$ ) $^+$ ,  $m/z$  358.1372, found 358.1378.

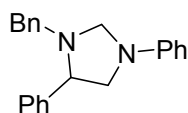

**3-benzyl-1,4-diphenylimidazolidine (5ac)**

White solid, yield (63%), mp. = 86.7 – 88.4 °C;

$^1\text{H}$  NMR (500 MHz,  $\text{CDCl}_3$ )  $\delta$  7.57 – 7.55 (m, 2H), 7.41 – 7.29 (m, 7H), 7.26 – 7.23 (m, 1H), 7.19 – 7.16 (m, 2H), 6.67 (t,  $J$  = 7.3 Hz, 1H), 6.41 (d,  $J$  = 7.6 Hz, 2H), 4.40 (d,  $J$  = 4.2 Hz, 1H), 3.97 – 3.92 (m, 2H), 3.81 (d,  $J$  = 4.2 Hz, 1H), 3.73 (dd,  $J$  = 8.6, 6.8 Hz, 1H), 3.35 (t,  $J$  = 8.8 Hz, 1H), 3.28 (d,  $J$  = 13.3 Hz, 1H).

$^{13}\text{C}$  NMR (125 MHz,  $\text{CDCl}_3$ )  $\delta$  146.2, 139.5, 138.6, 129.2, 128.8, 128.4, 128.4, 128.1, 128.0, 127.2, 116.4, 111.4, 70.5, 68.1, 56.3, 55.7.

HRMS (ESI+) calcd for  $\text{C}_{22}\text{H}_{23}\text{N}_2$  ( $\text{M}+\text{H}$ ) $^+$ ,  $m/z$  315.1856, found 315.1855.

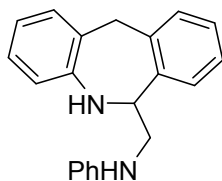

*N*-((6,11-dihydro-5H-dibenzo[b,e]azepin-6-yl)methyl)aniline (**8**)

White solid, yield (65%), mp. = 98.7 – 100.2 °C;

<sup>1</sup>H NMR (500 MHz, CDCl<sub>3</sub>) δ 7.25 – 7.21 (m, 5H), 7.17 – 7.16 (m, 1H), 7.06 (dd, J = 7.6, 1.5 Hz, 1H), 7.00 (td, J = 7.6, 1.5 Hz, 1H), 6.78 – 6.70 (m, 4H), 6.59 (dd, J = 7.8, 1.1 Hz, 1H), 4.99 (dd, J = 8.8, 4.7 Hz, 1H), 4.35 (d, J = 14.9 Hz, 1H), 4.04 (s, 2H), 3.95 (d, J = 14.9 Hz, 1H), 3.66 – 3.57 (m, 2H).

<sup>13</sup>C NMR (125 MHz, CDCl<sub>3</sub>) δ 147.8, 145.3, 139.5, 137.3, 129.8, 129.5, 128.8, 127.9, 127.6, 127.0, 126.7, 126.0, 119.6, 118.7, 118.1, 113.2, 56.0, 49.2, 40.0.

HRMS (ESI<sup>+</sup>) calcd for C<sub>21</sub>H<sub>21</sub>N<sub>2</sub> (M+H)<sup>+</sup>, m/z 301.1699, found 301.1698.

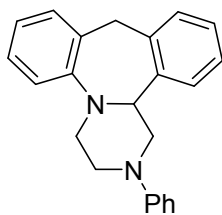

2-phenyl-1,2,3,4,10,14b-hexahydrodibenzo[c,f]pyrazino[1,2-a]azepine (**9**)

White solid, yield (53%), mp. = 201.8 – 202.3 °C;

<sup>1</sup>H NMR (500 MHz, CDCl<sub>3</sub>) δ 7.30 – 7.25 (m, 2H), 7.20 – 7.10 (m, 5H), 7.07 – 7.03 (m, 2H), 6.99 – 6.97 (m, 2H), 6.90 – 6.86 (m, 2H), 4.84 (d, J = 12.7 Hz, 1H), 4.19 (dd, J = 10.4, 2.5 Hz, 1H), 3.80 – 3.76 (m, 1H), 3.63 (dt, J = 11.7, 2.3 Hz, 1H), 3.50 – 3.39 (m, 2H), 3.34 (d, J = 12.7 Hz, 1H), 3.13 – 3.03 (m, 2H).

<sup>13</sup>C NMR (125 MHz, CDCl<sub>3</sub>) δ 149.9, 147.4, 138.7, 138.6, 136.0, 128.5, 128.1, 127.2, 126.3, 126.2, 125.6, 121.4, 118.9, 117.9, 115.1, 65.5, 57.3, 50.2, 48.9, 37.8.

HRMS (ESI<sup>+</sup>) calcd for C<sub>23</sub>H<sub>23</sub>N<sub>2</sub> (M+H)<sup>+</sup>, m/z 327.1856, found 327.1859.

## V References



- 
1. Nithinchandra, B. Kalluraya, S. Aamir and A.R. Shabaraya, Regioselective reaction: Synthesis, characterization and pharmacological activity of some new Mannich and Schiff bases containing sydnone, *Eur. J. Med. Chem.* 2012, **54**, 597-604.
  2. P. Vicini, A. Geronikaki, M. Incerti, B. Busonera, G. Poni, C. A. Cabras and P. L. Colla, Synthesis and biological evaluation of benzo[d]isothiazole, benzothiazole and thiazole Schiff bases, *Bioorg. Med. Chem.* 2003, **11**, 4785-4789.
  3. K. P. Dhake, P. J. Tambade, R. S. Singhal and B. M. Bhanage, An efficient, catalyst- and solvent-free N-formylation of aromatic and aliphatic amines, *Green Chem. Lett. Rev.* 2011, **4**, 151-157.
  4. J. H. Boyer and J. R. Patel, Cyclization from Aryl Formamides in Phosphorus Oxychloride and Tin(IV) Chloride, *Synthesis* 1978, **3**, 205-205.
  5. E. Fava, A. Millet, M. Nakajima, S. Loescher and M. Rueping, Reductive Umpolung of Carbonyl Derivatives with Visible-Light Photoredox Catalysis: Direct Access to Vicinal Diamines and Amino Alcohols via  $\alpha$ -Amino Radicals and Ketyl Radicals, *Angew.Chem. Int. Ed.* 2016, **55**, 6776–6779.
  6. H. Chen, S. Sanjaya, Y.-F. Wang and S. Chiba, Copper-Catalyzed Aliphatic C-H Amination with an Amidine Moiety, *Org. Lett.* 2013, **15**, 1, 212–215.
  7. P. Liu, C.-H. Zhu, G.-Y. Xu and J.-T. Sun, Iron-catalyzed intermolecular cycloaddition of diazo surrogates with hexahydro-1,3,5-triazines, *Org. Biomol. Chem.*, 2017, **15**, 7743-7746.

## VII NMR Spectra of all products

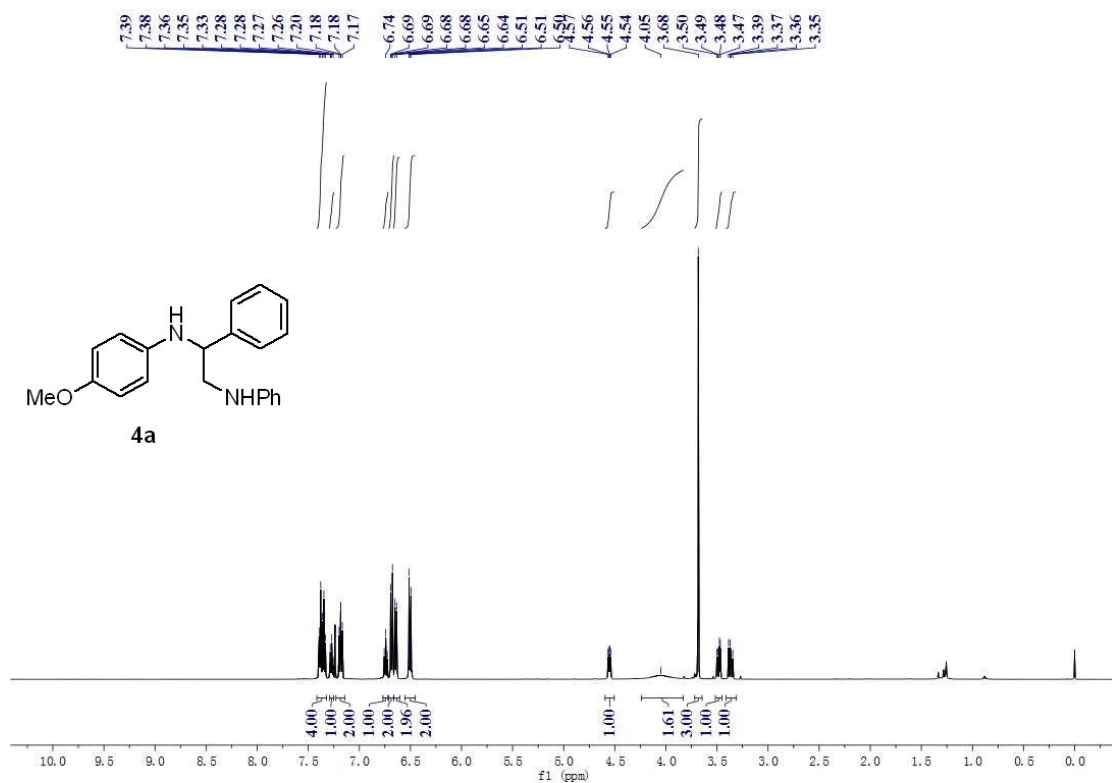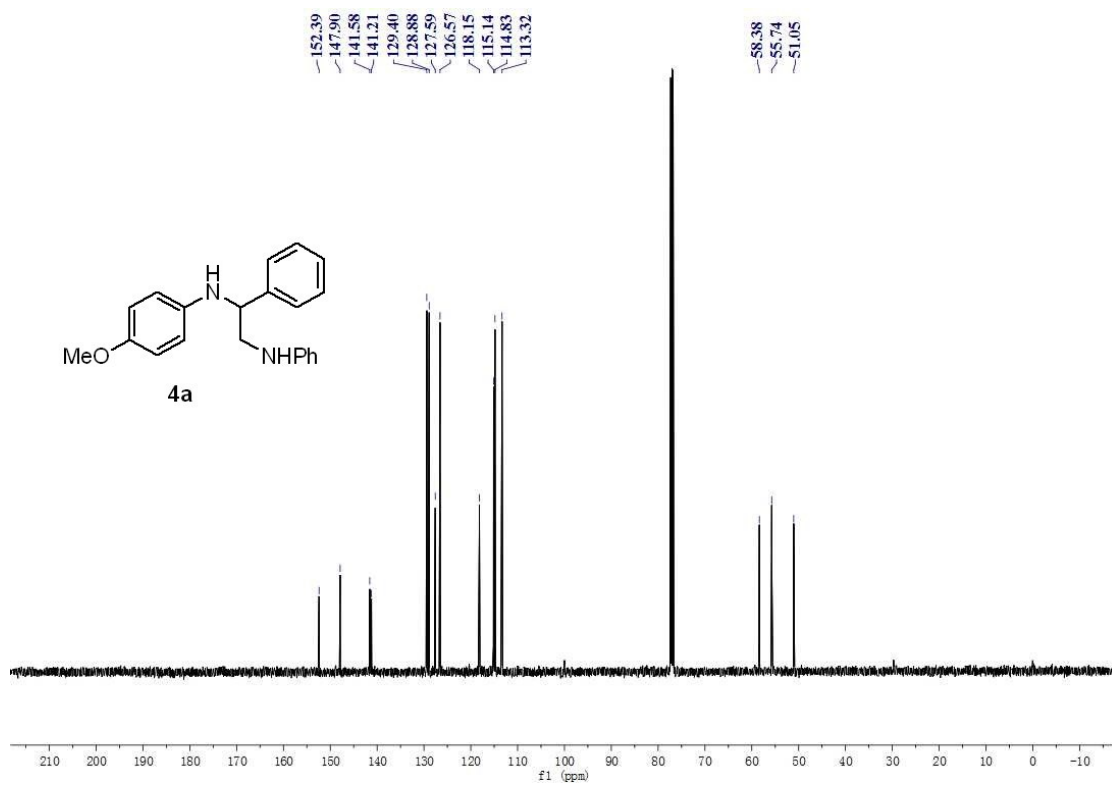

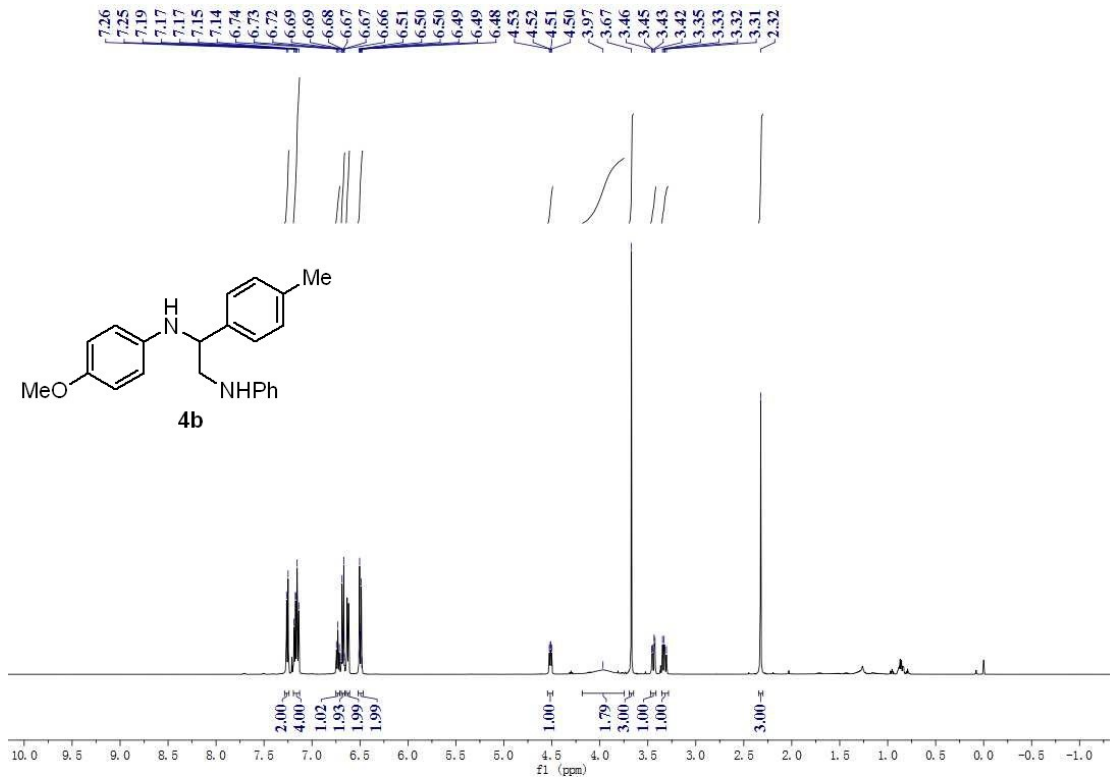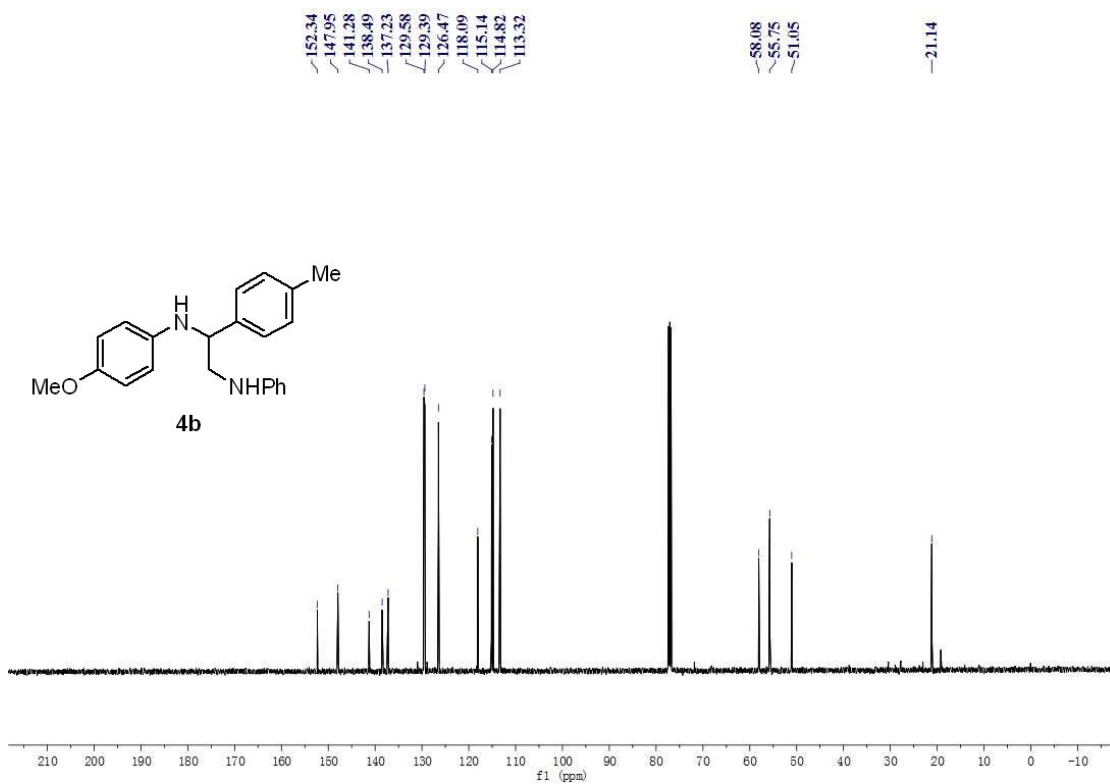

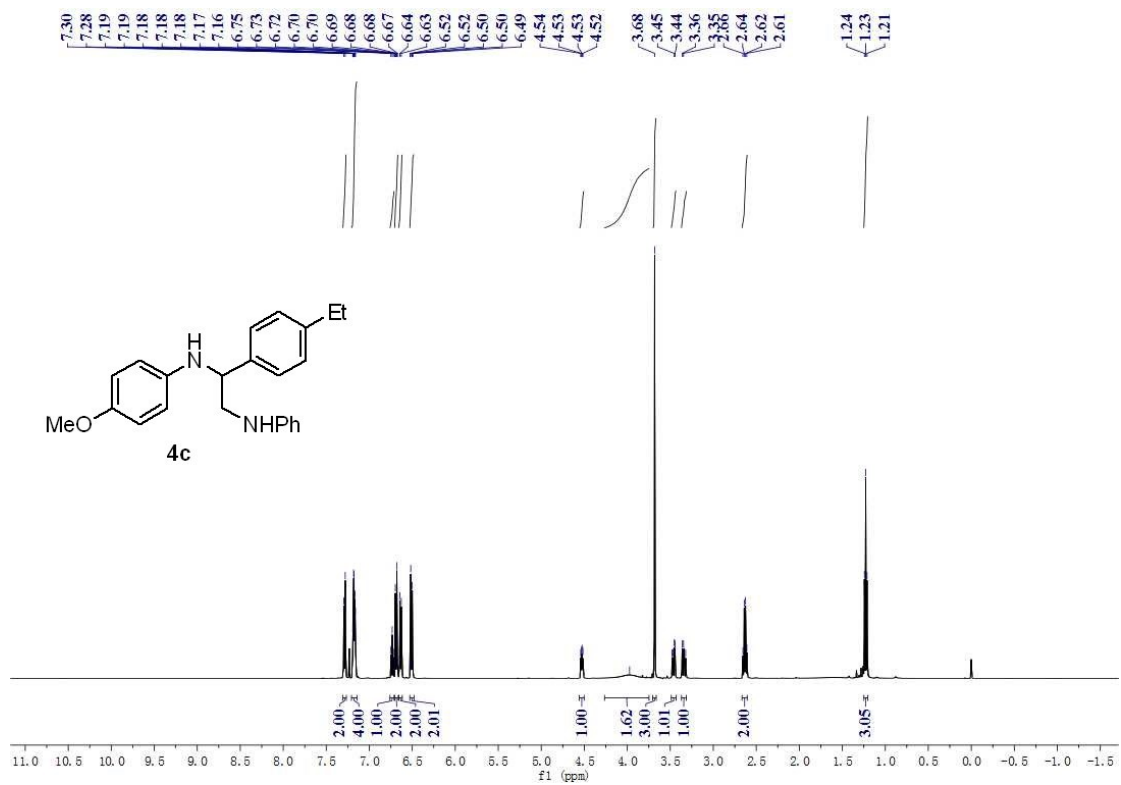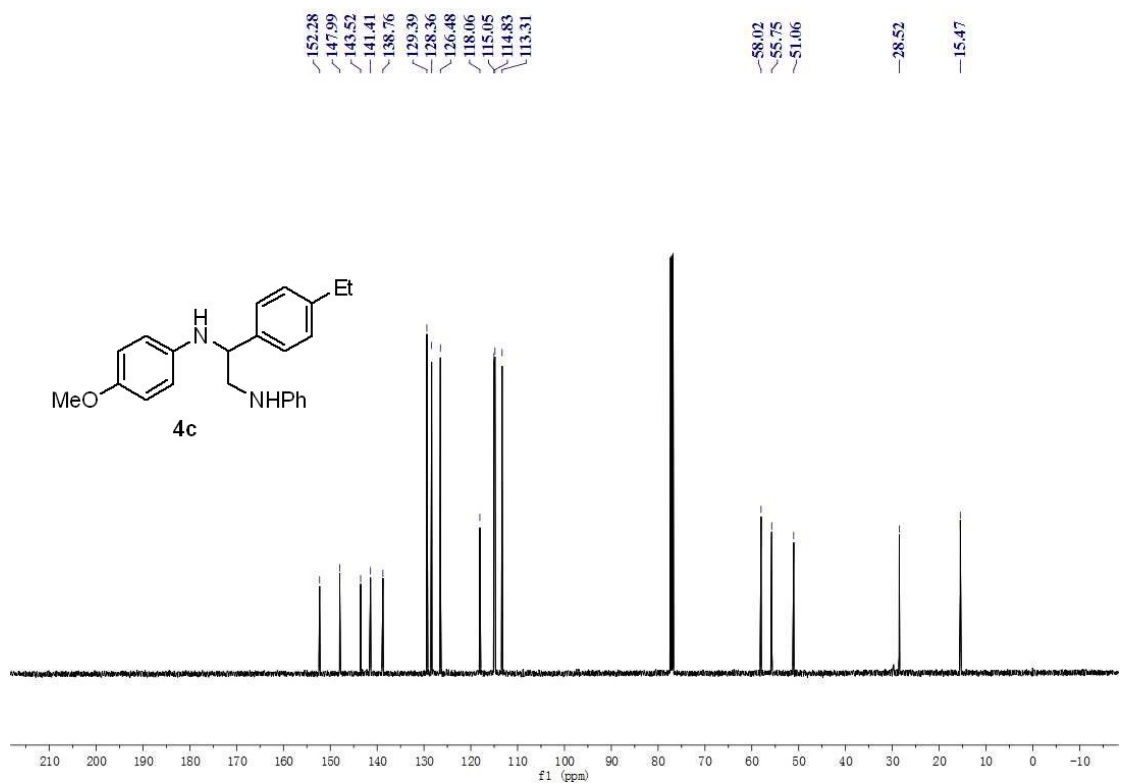

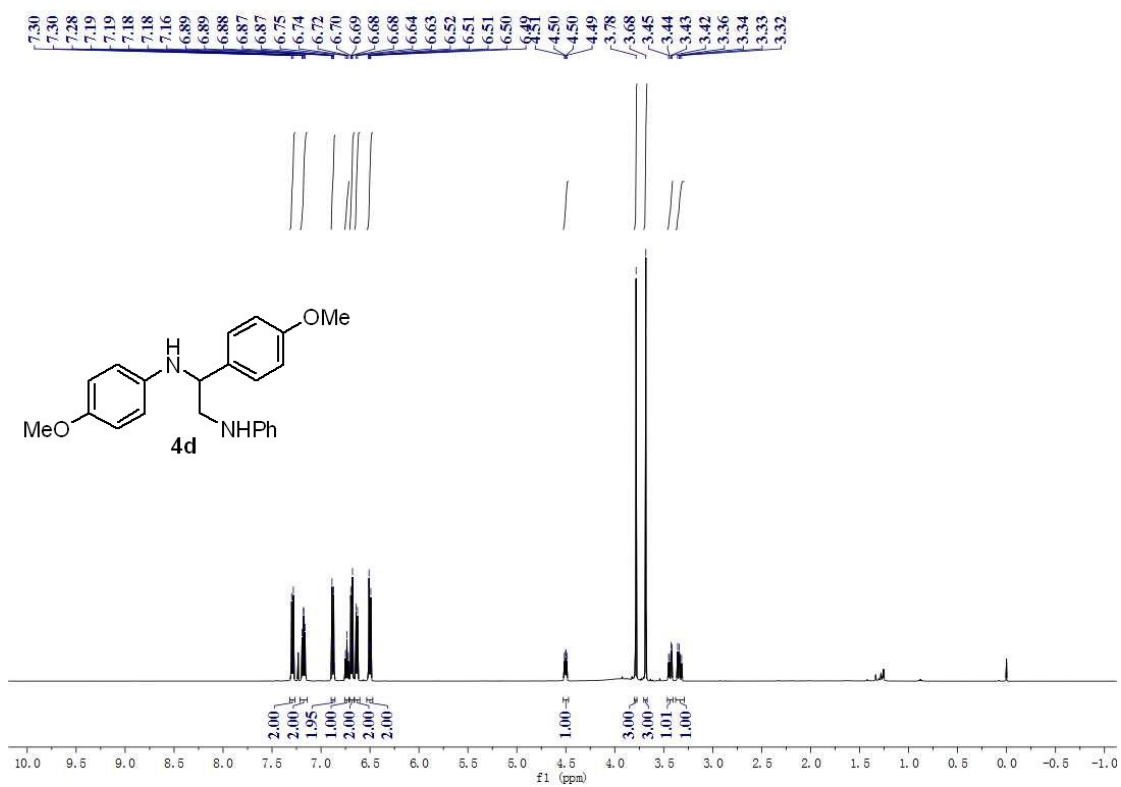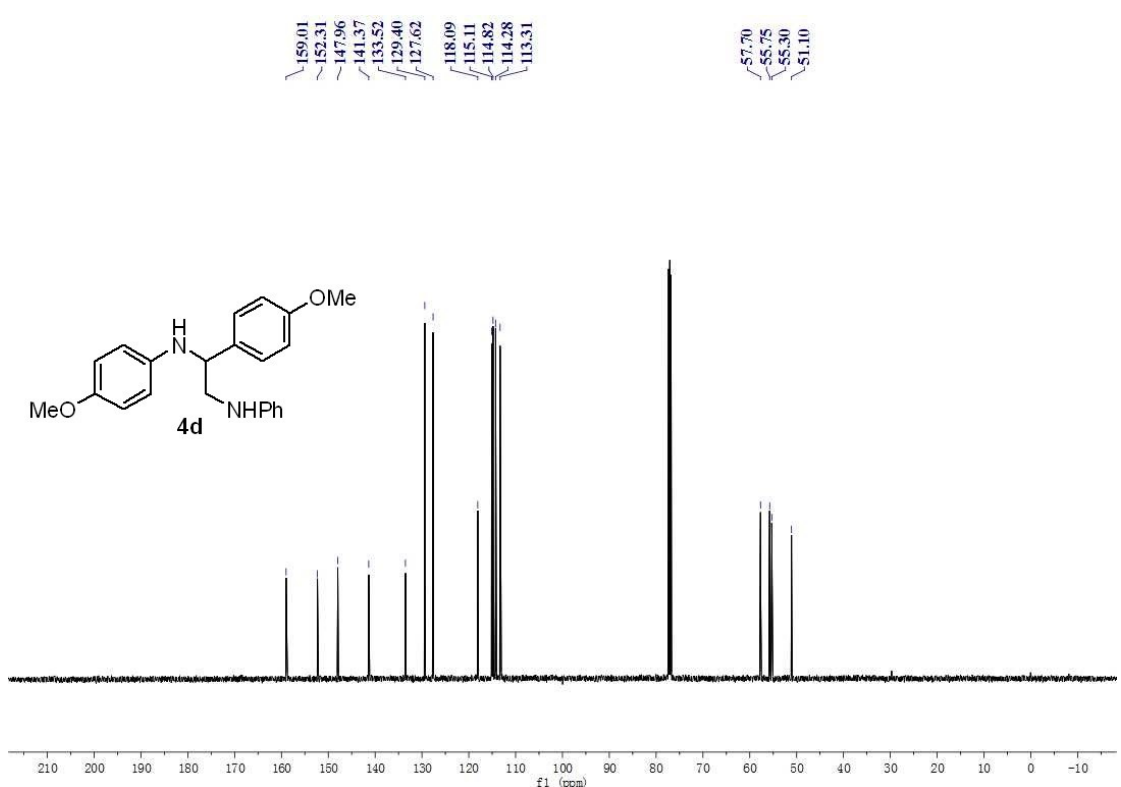

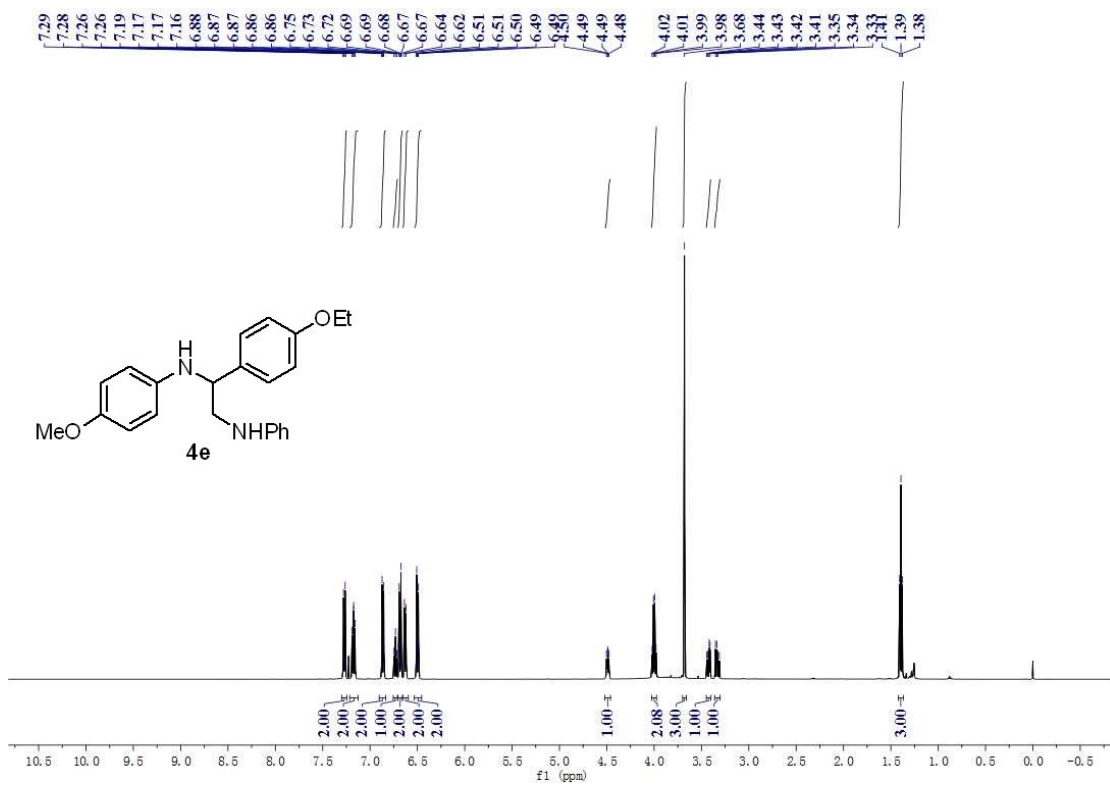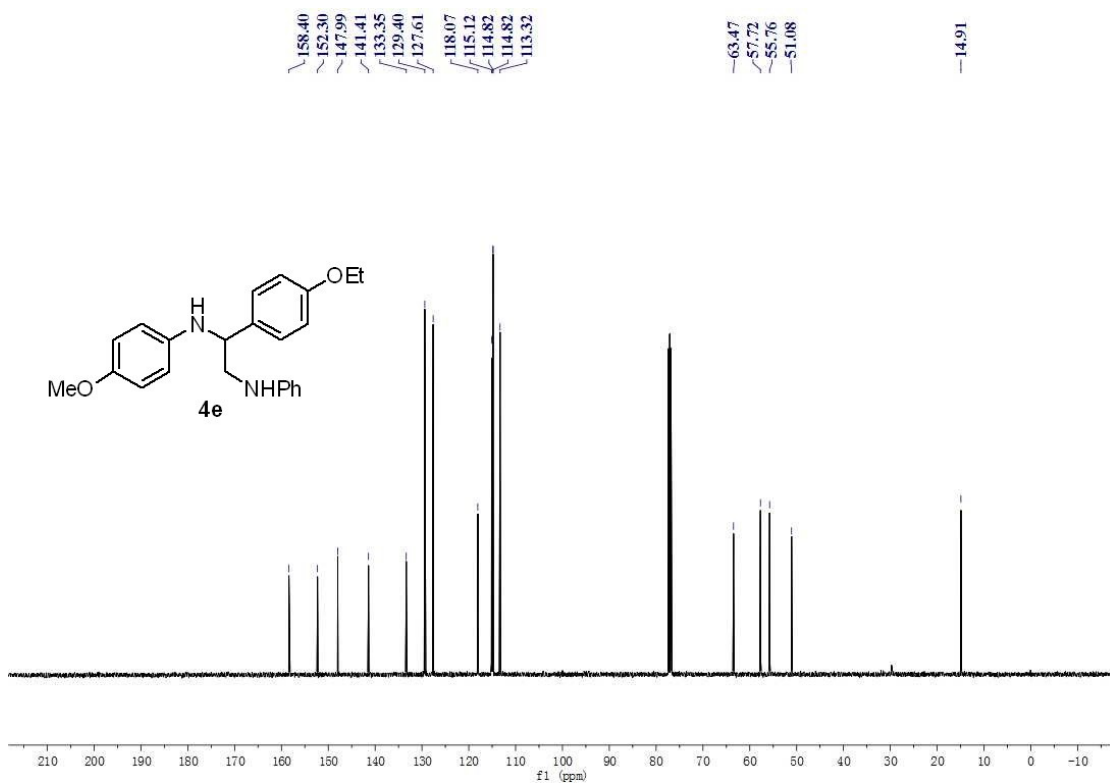

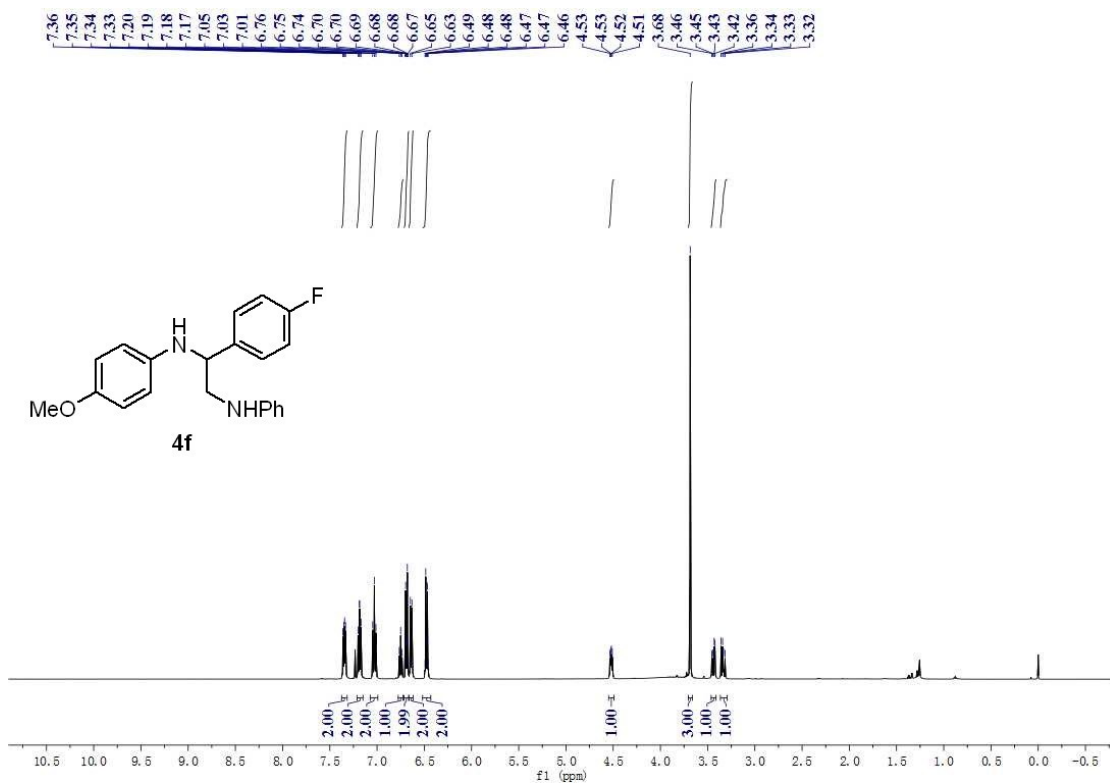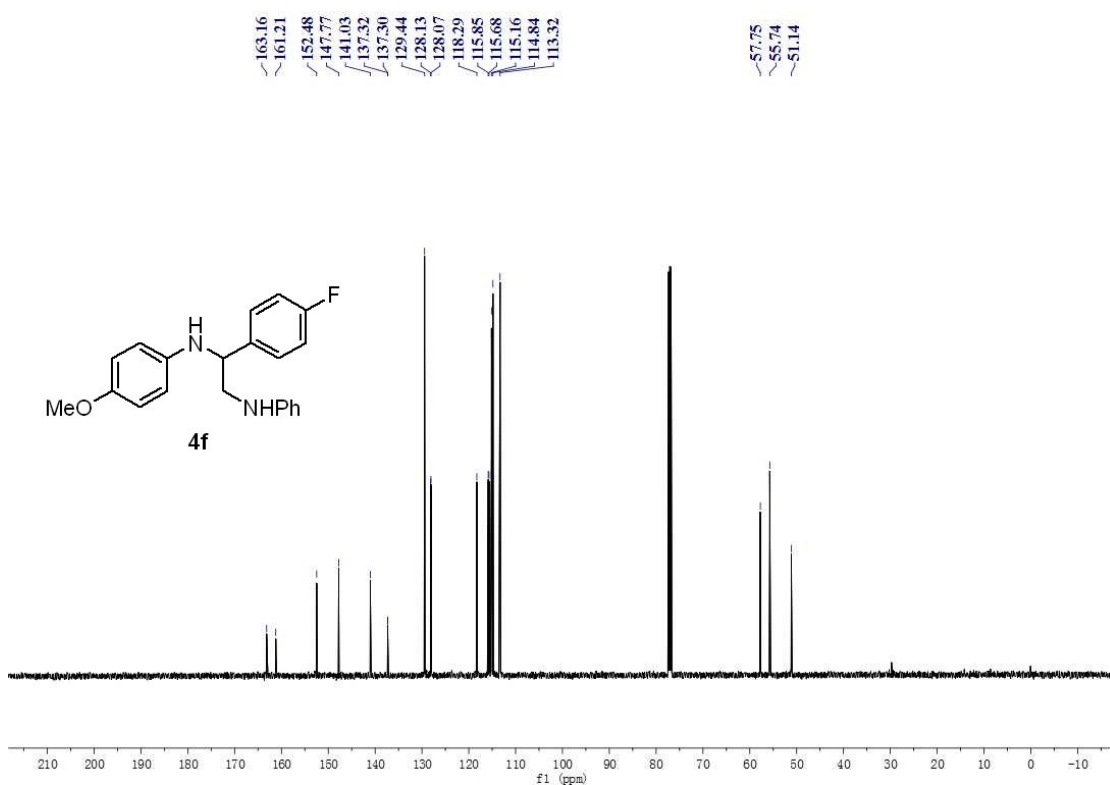

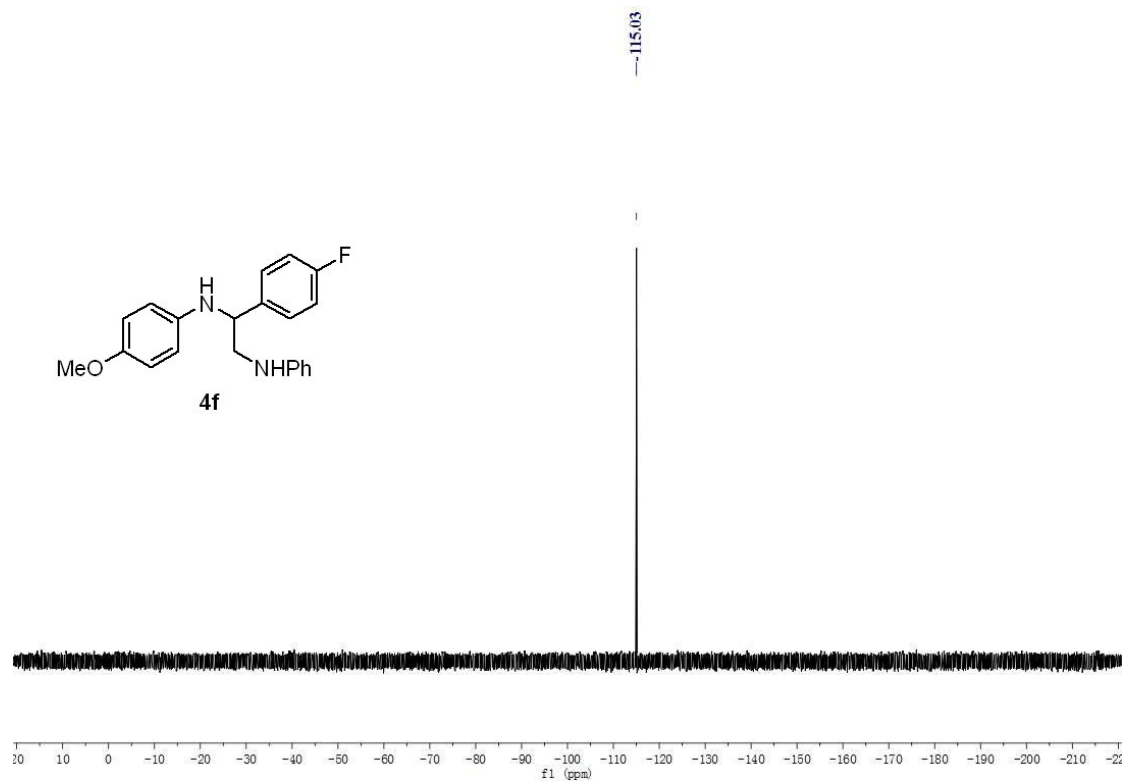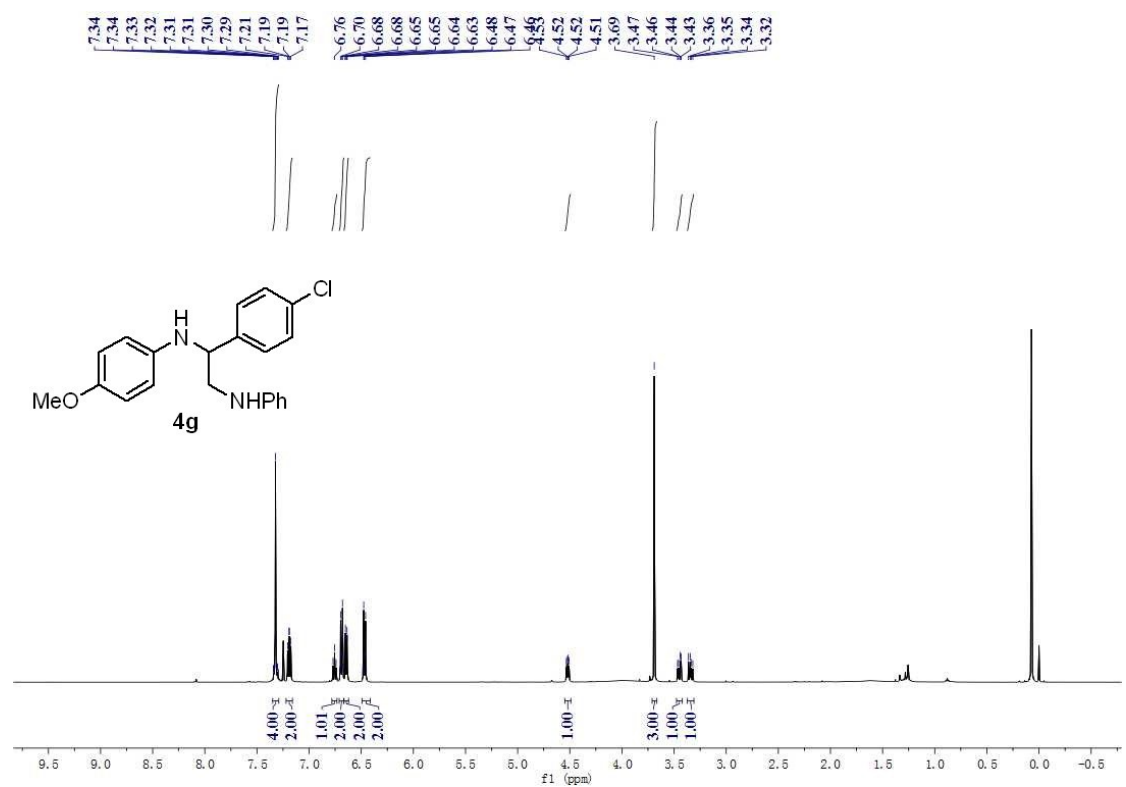



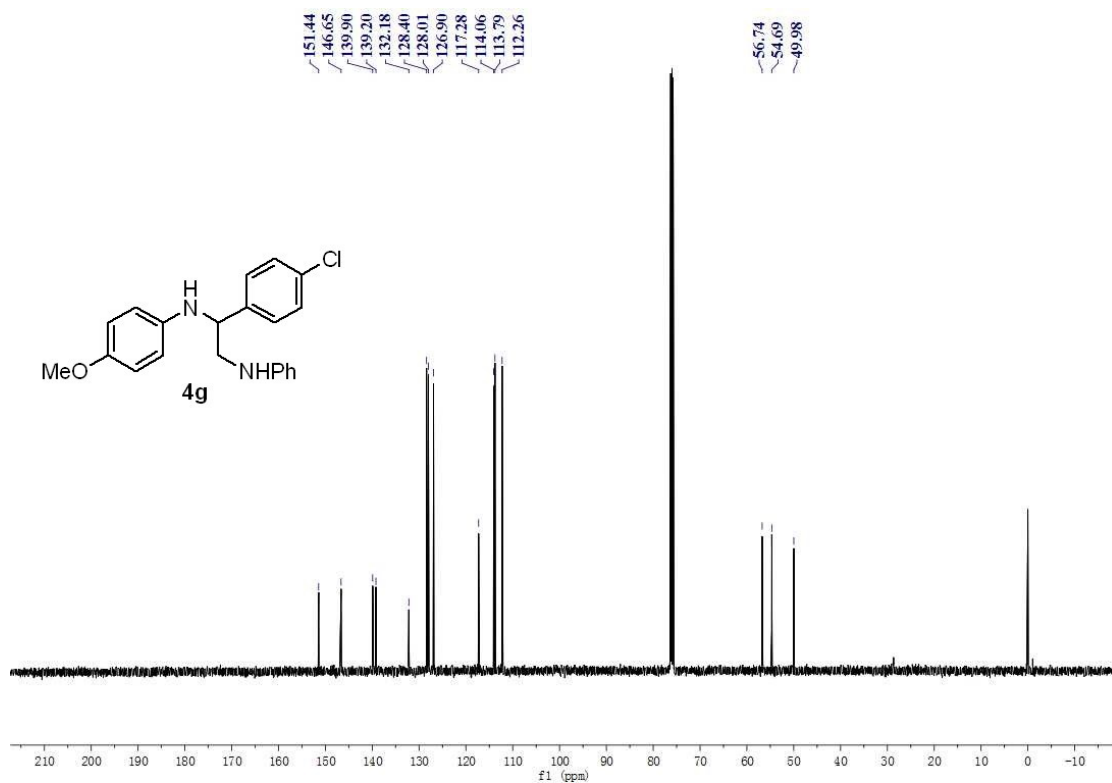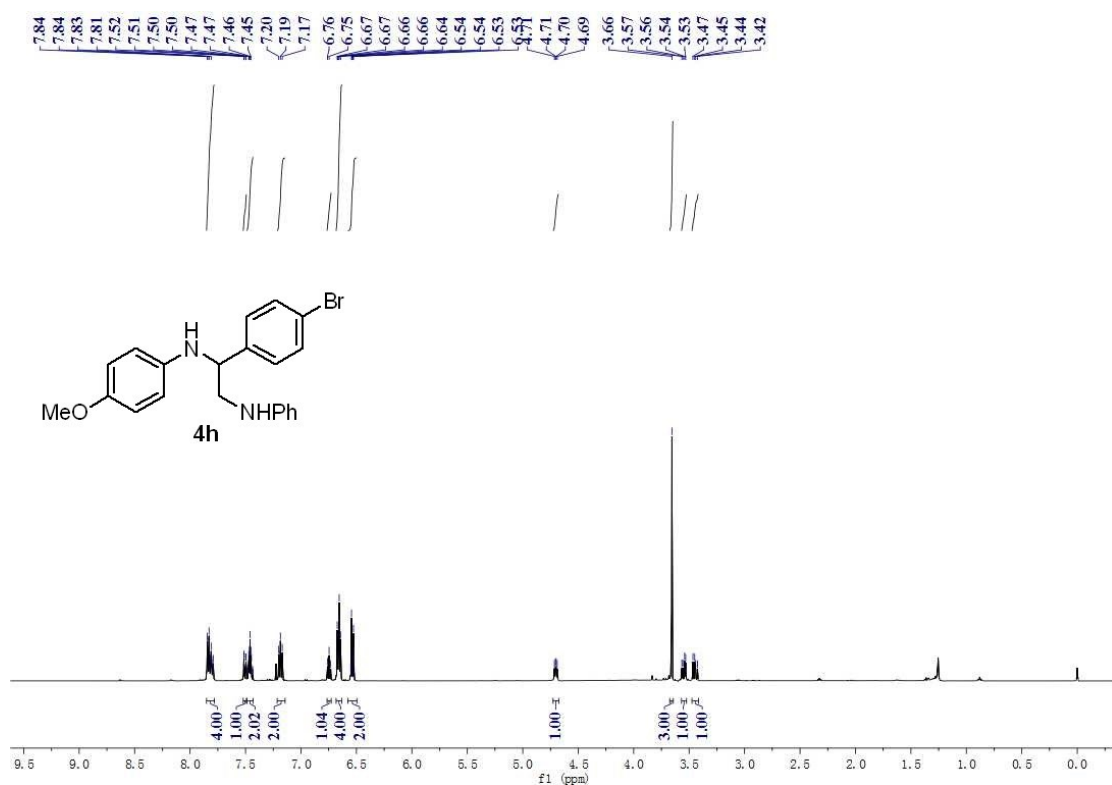

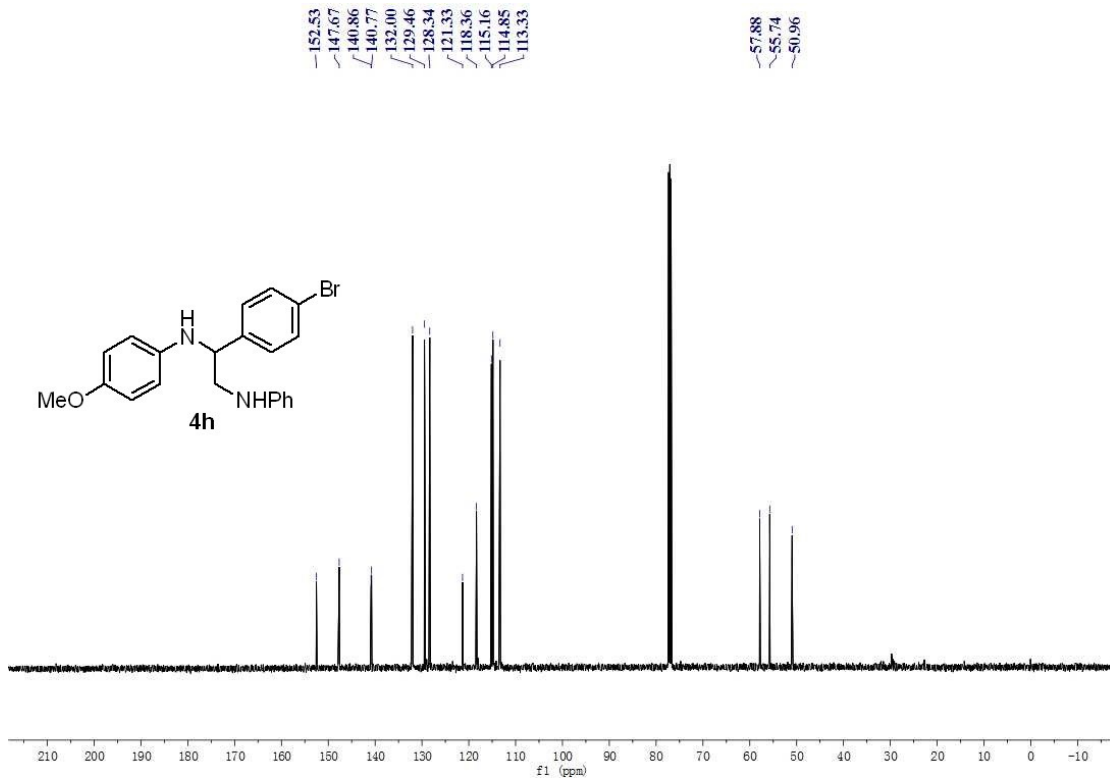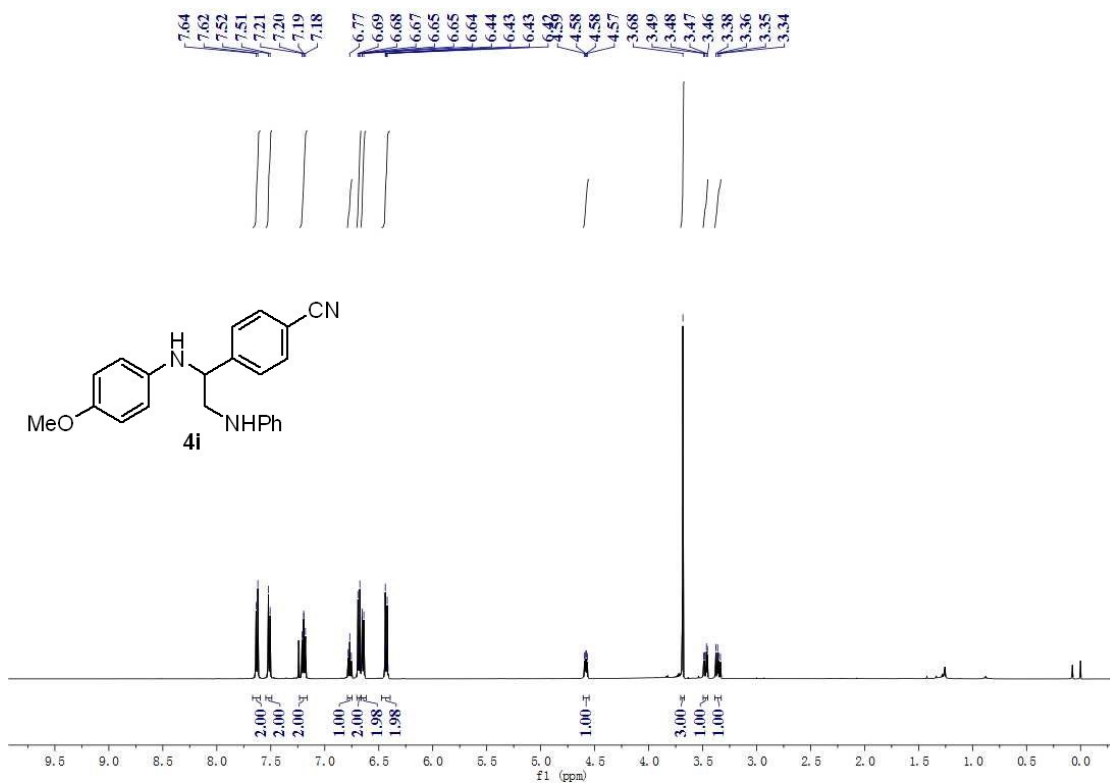

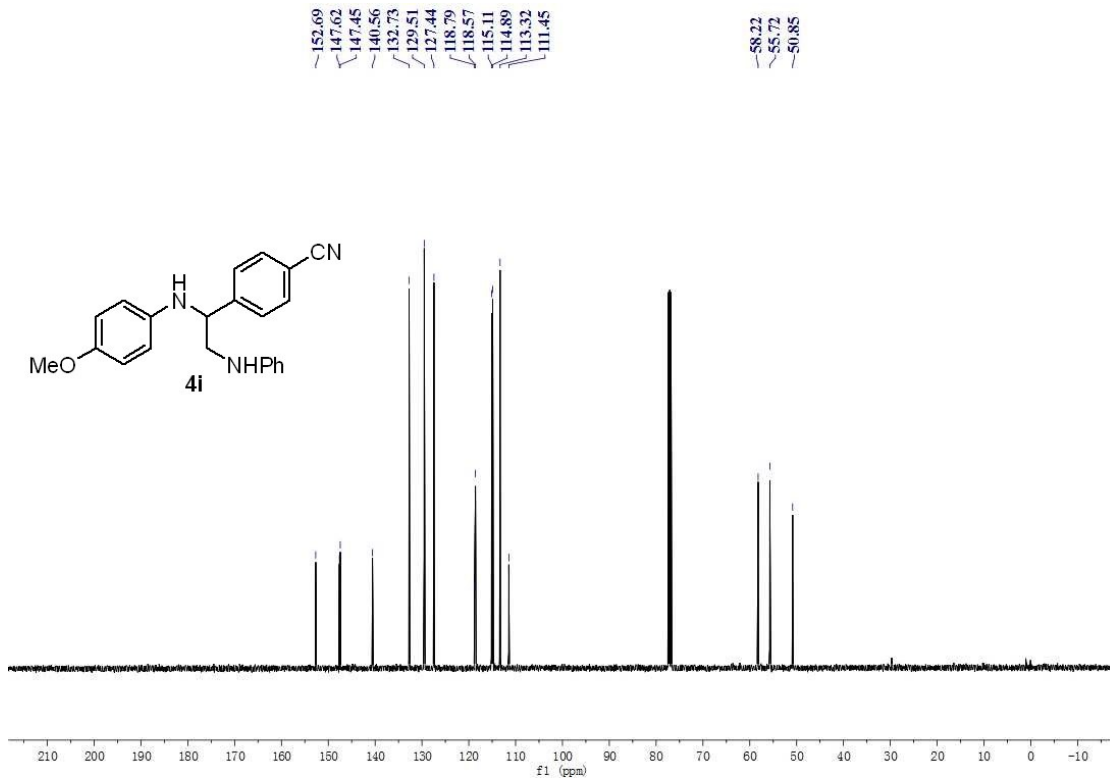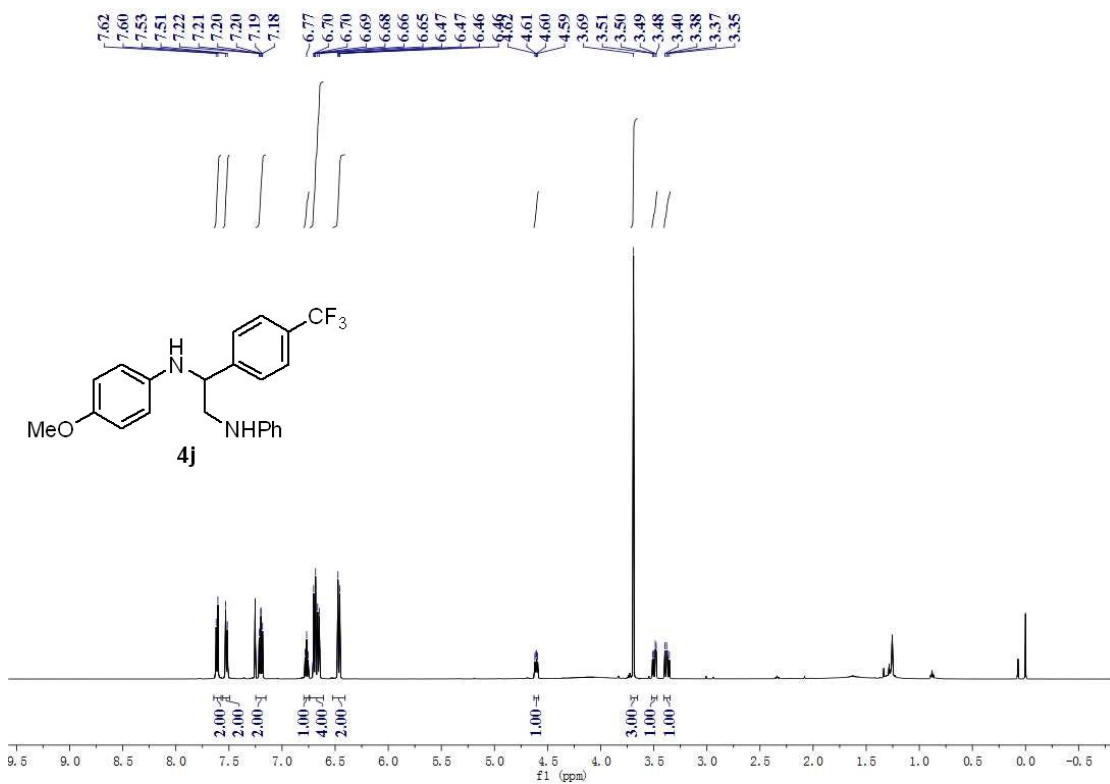

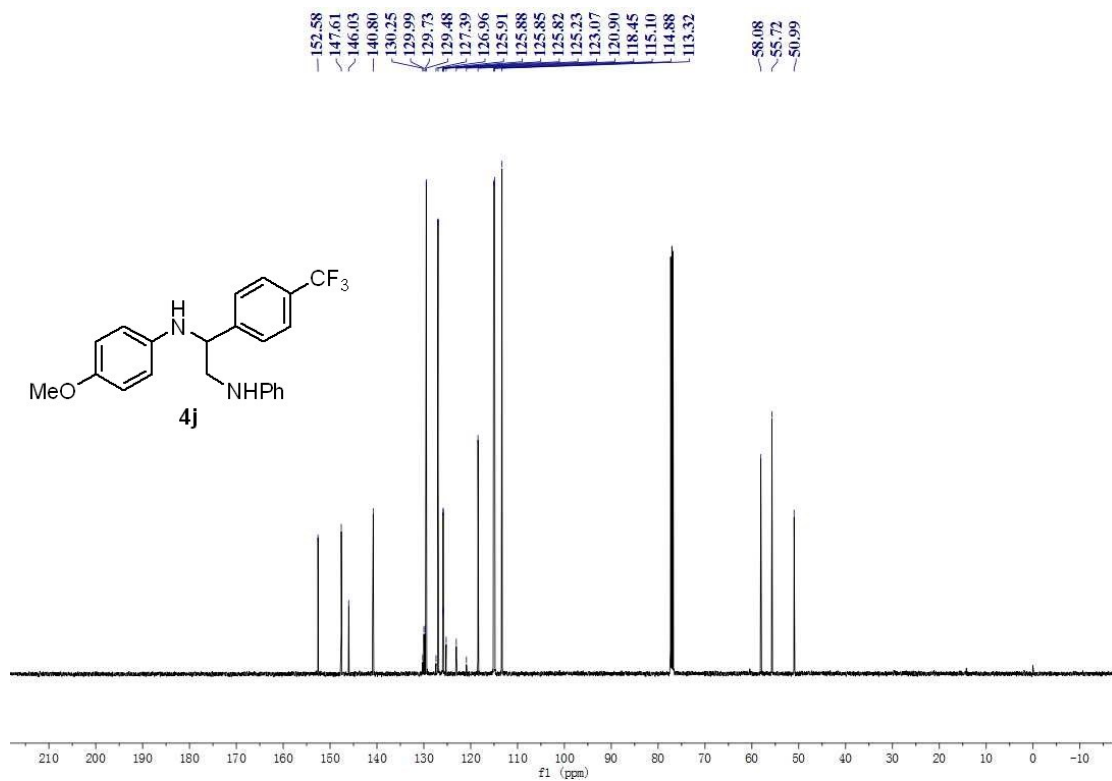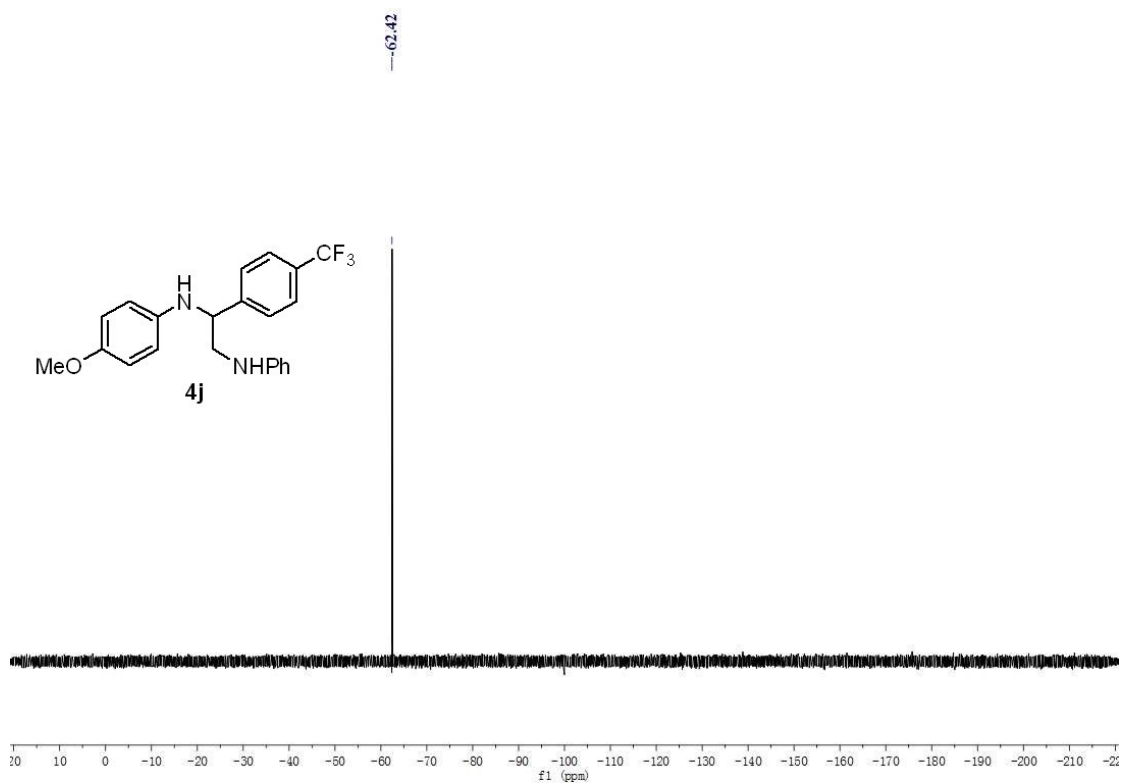

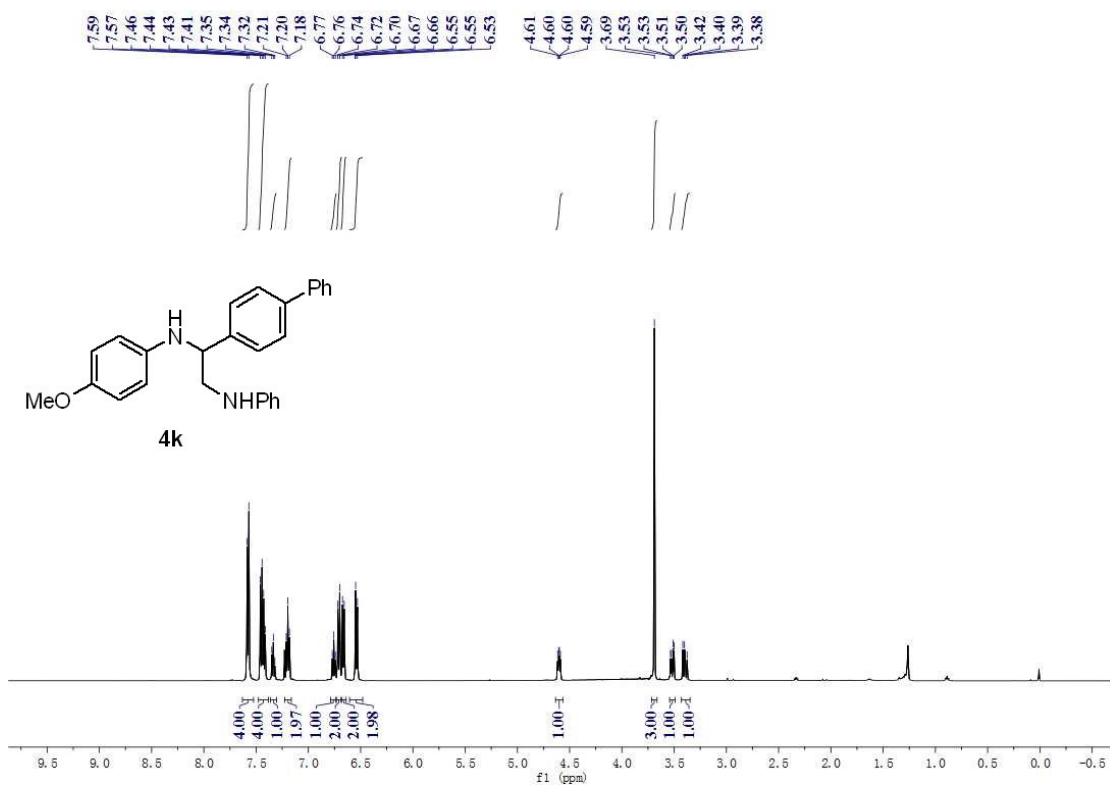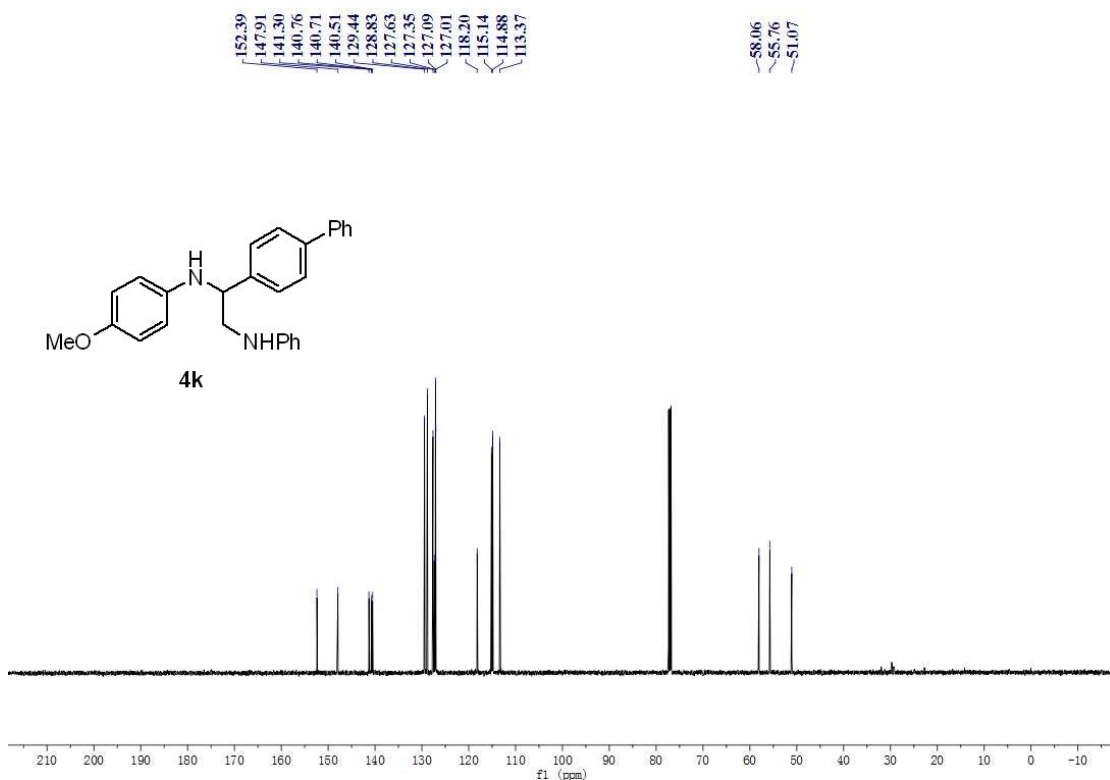

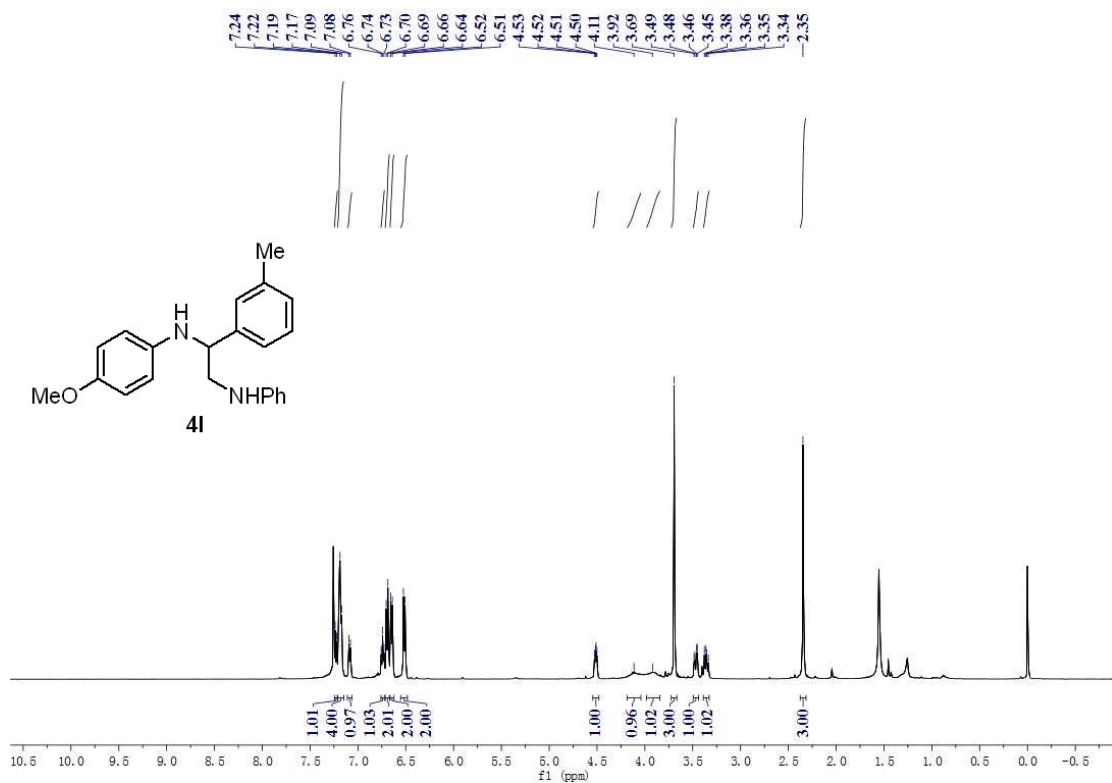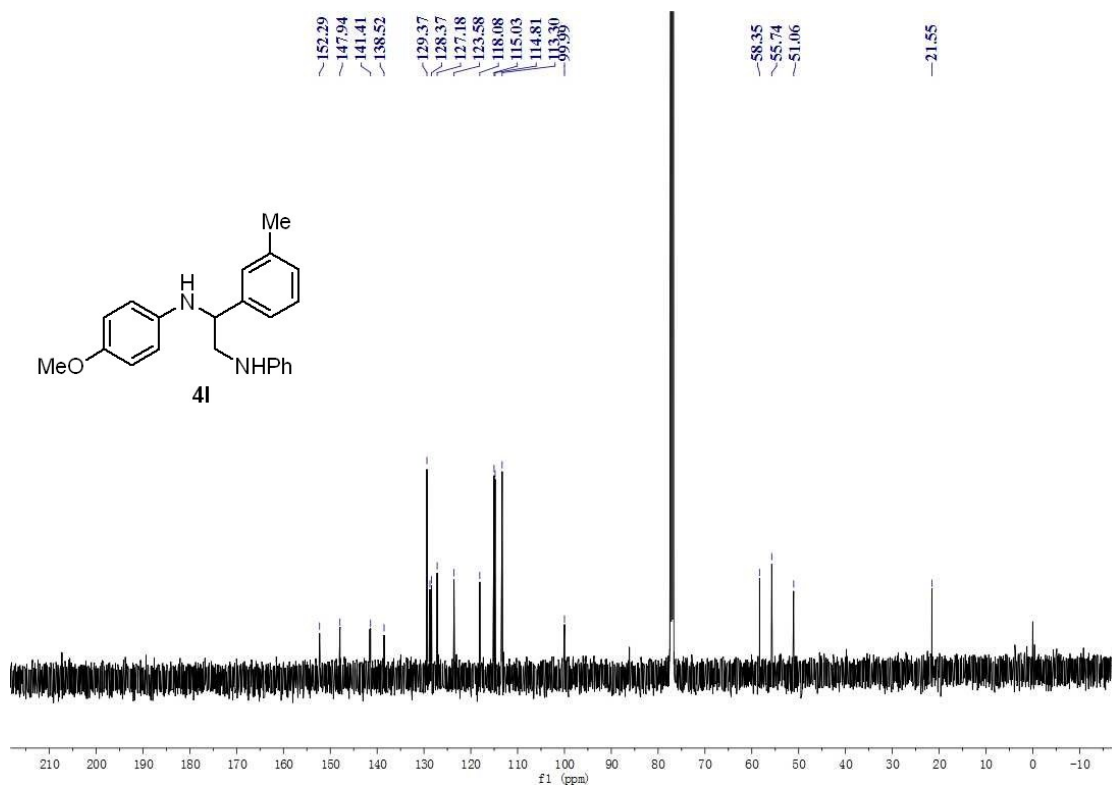

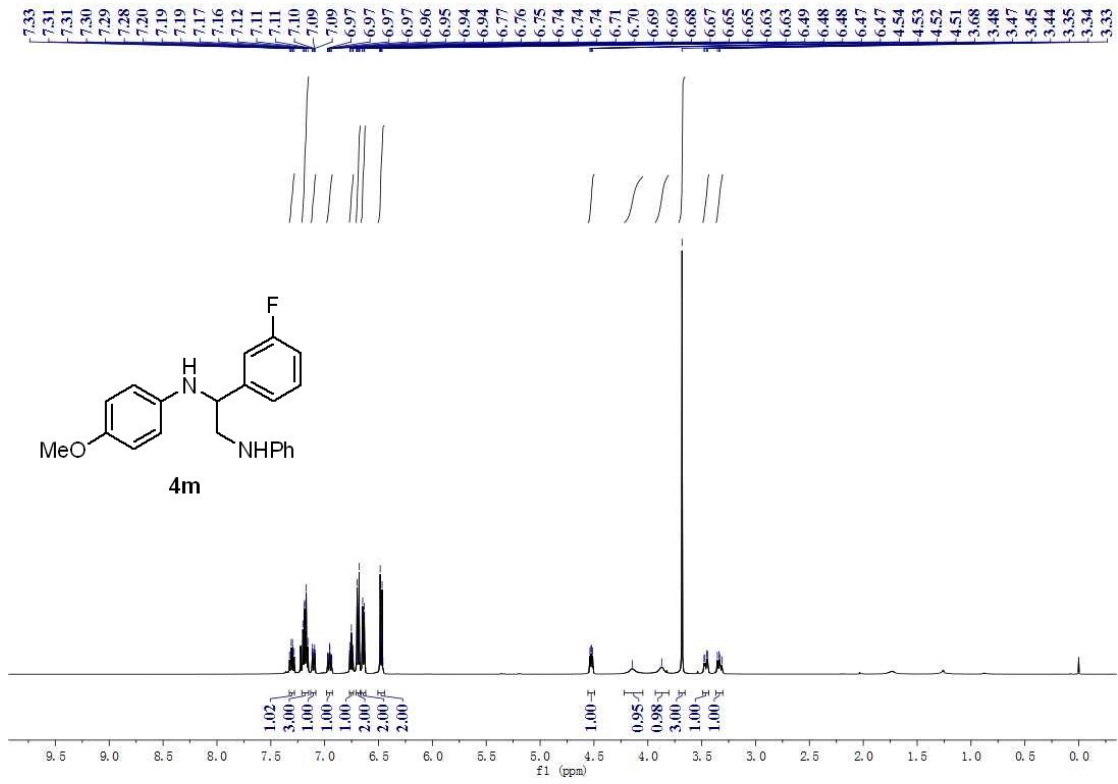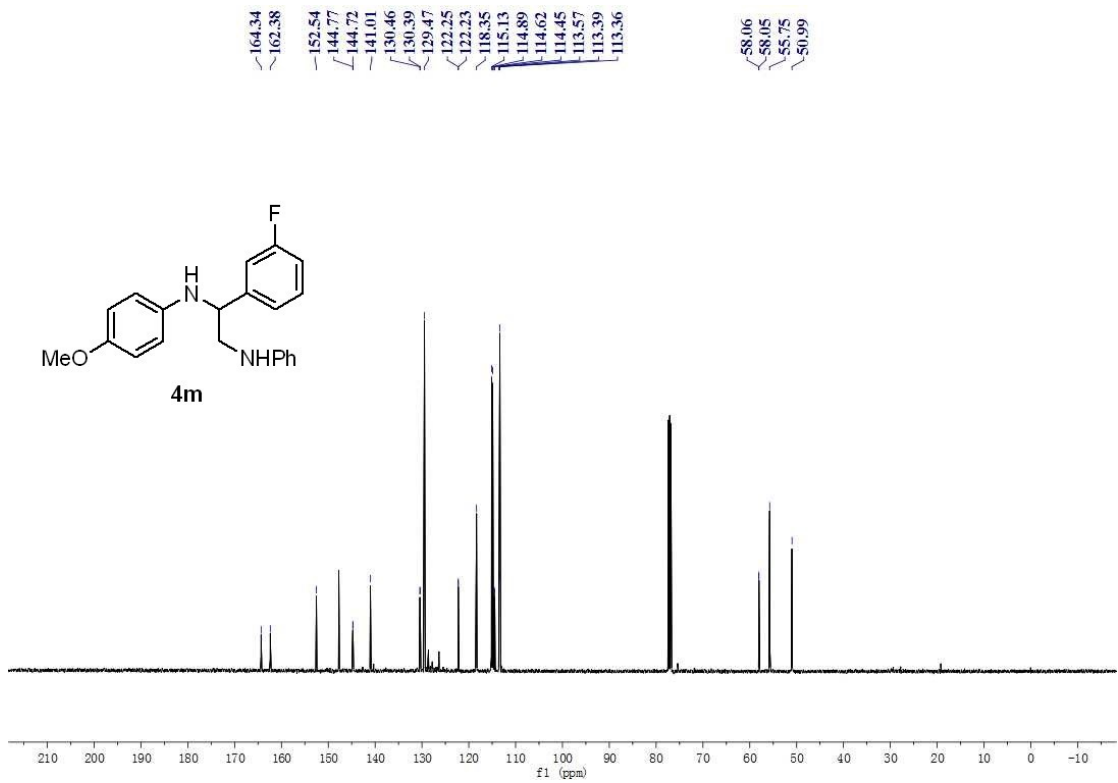

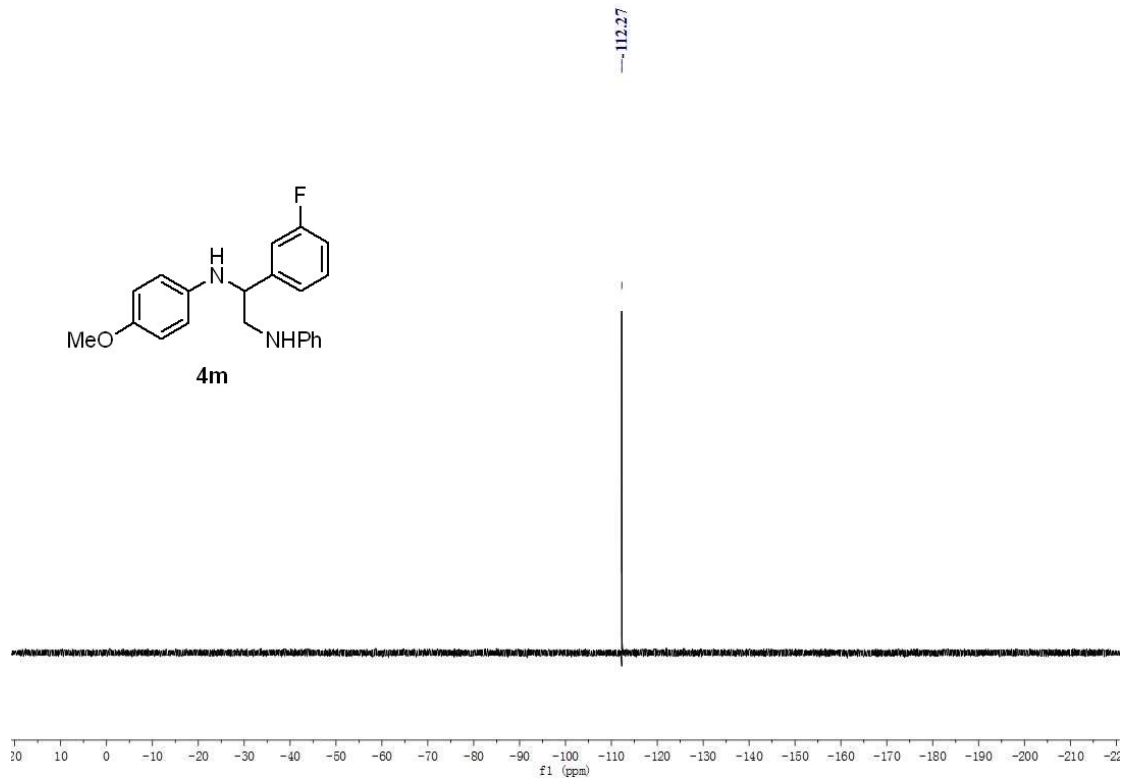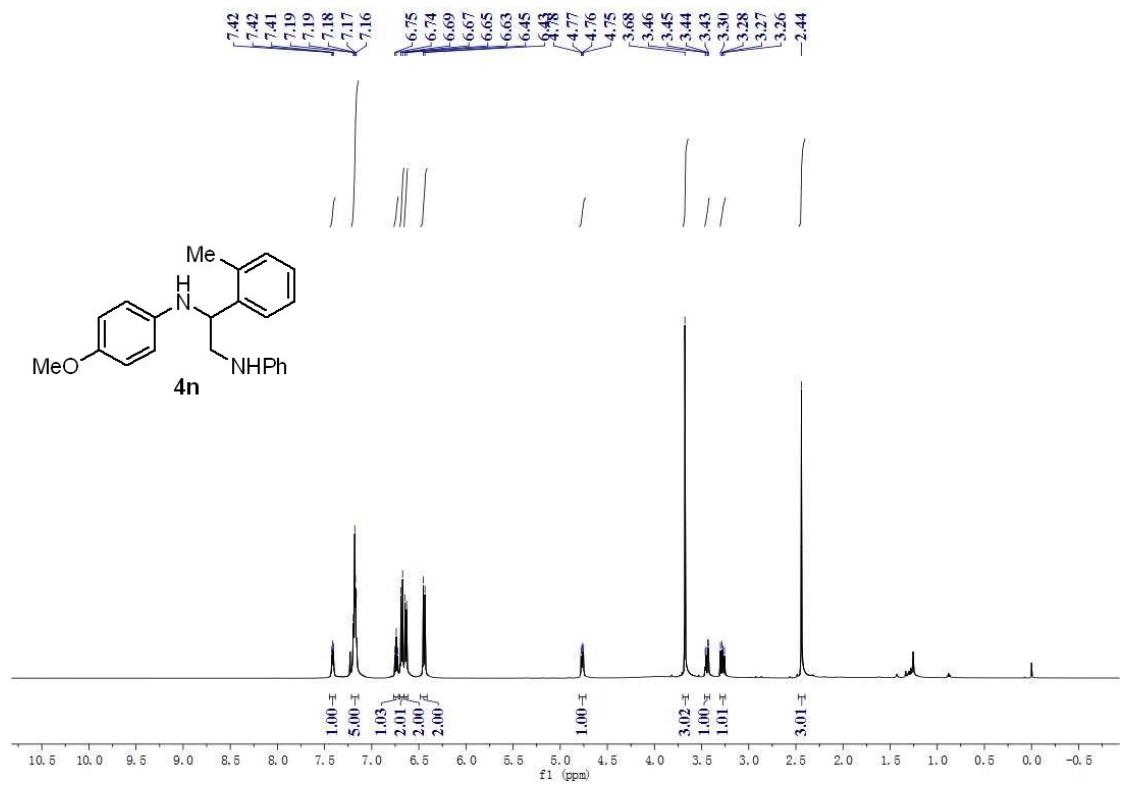



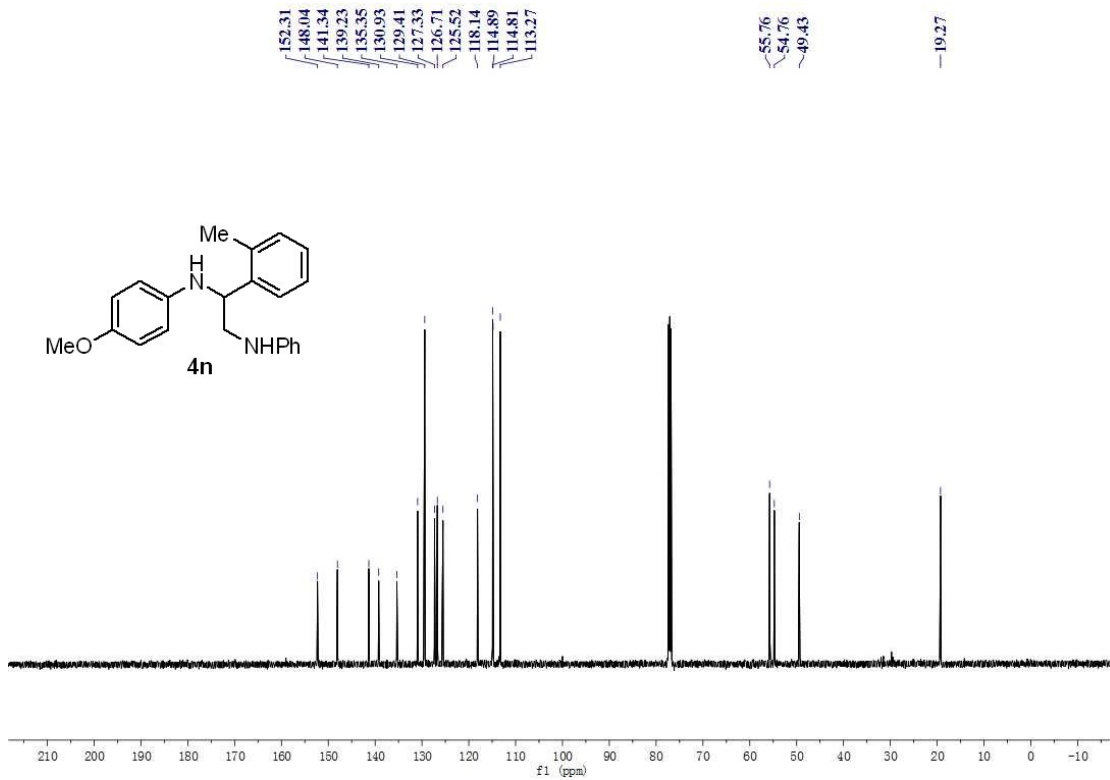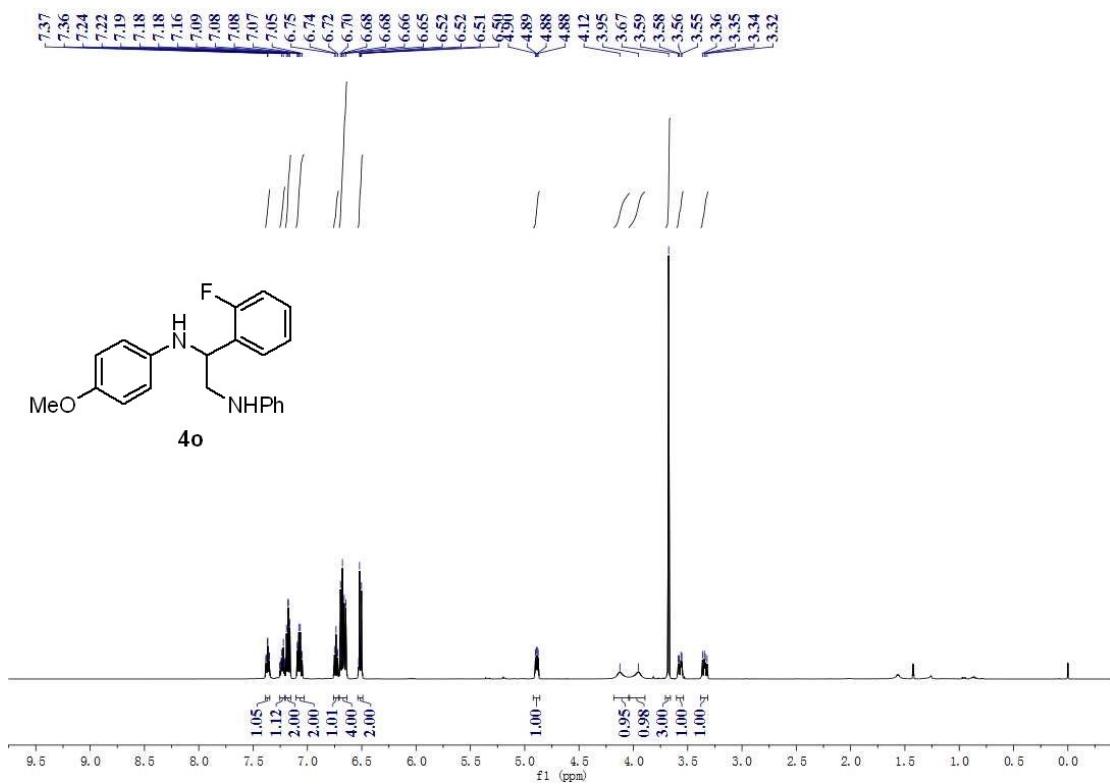

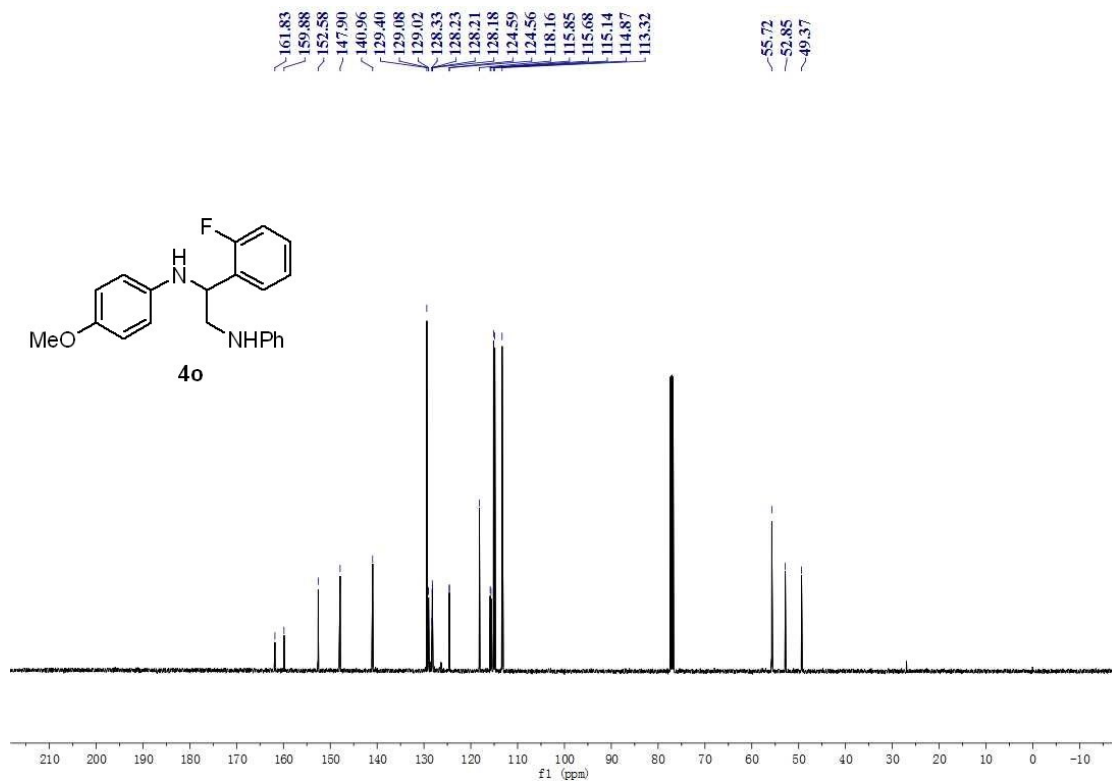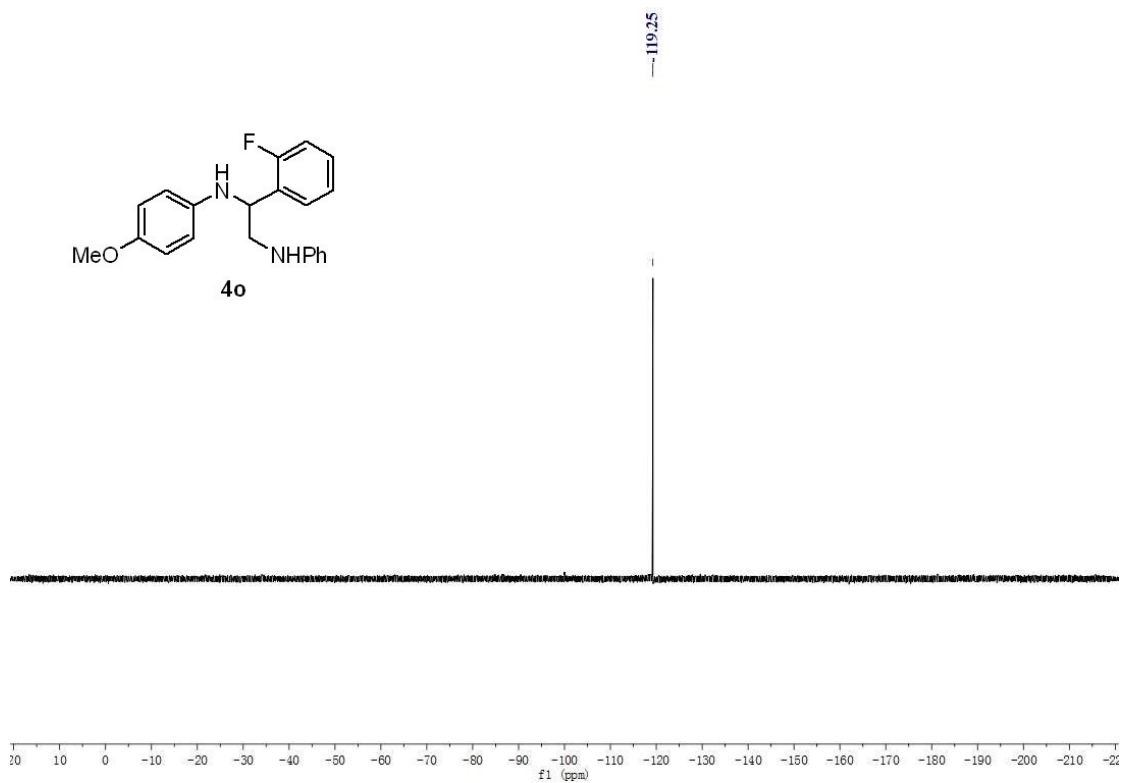

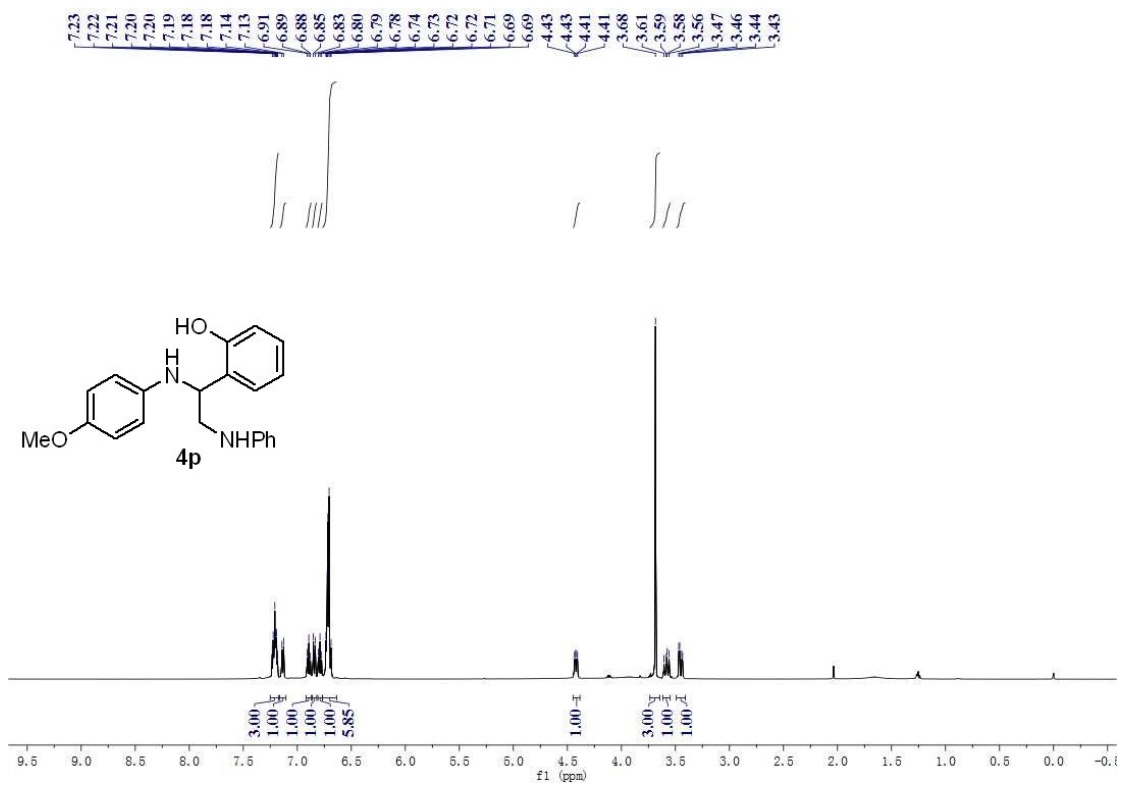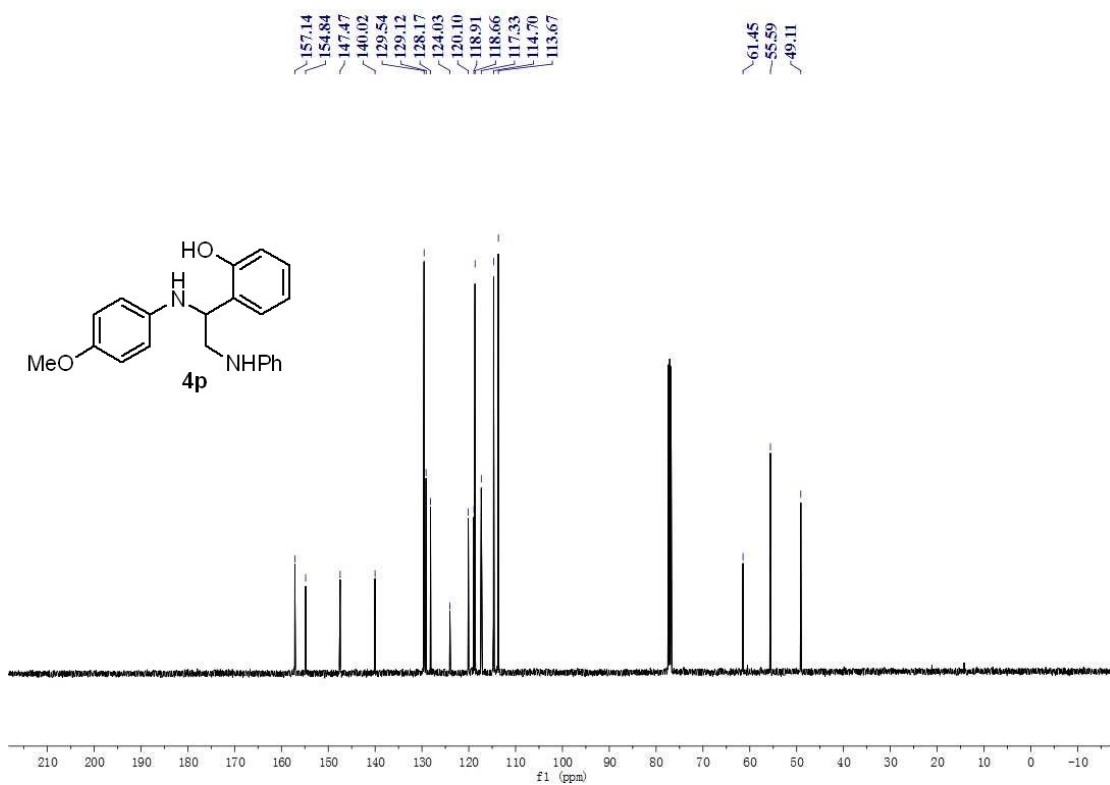

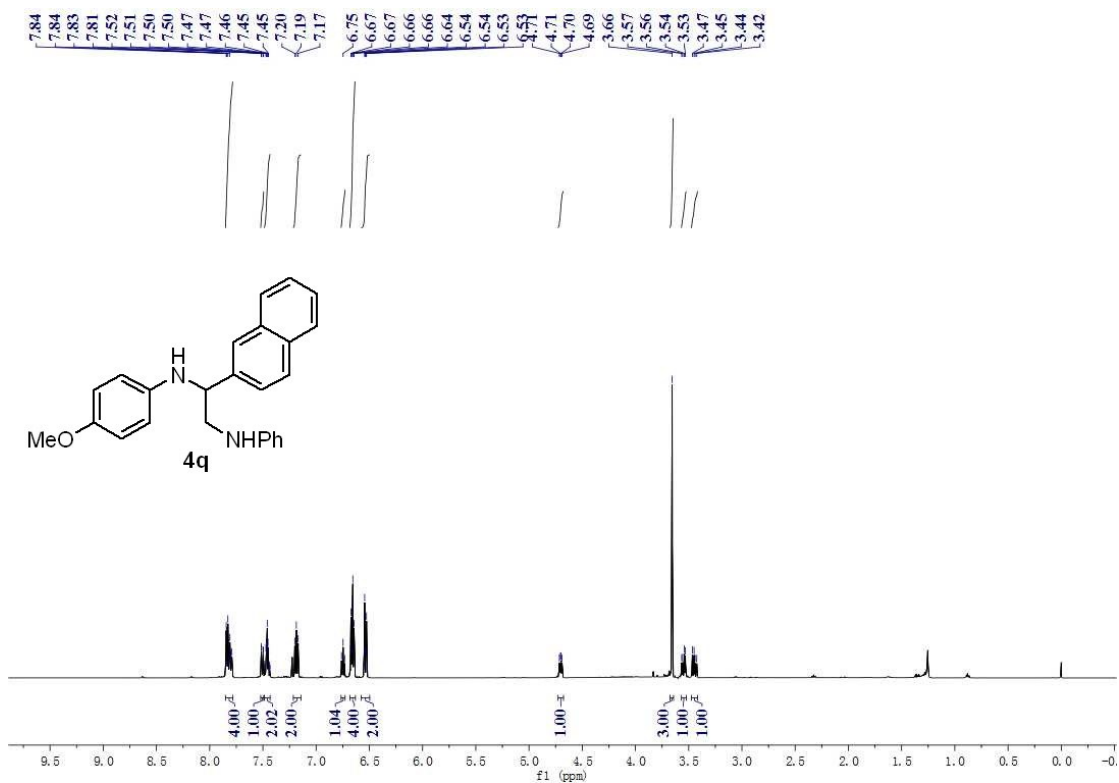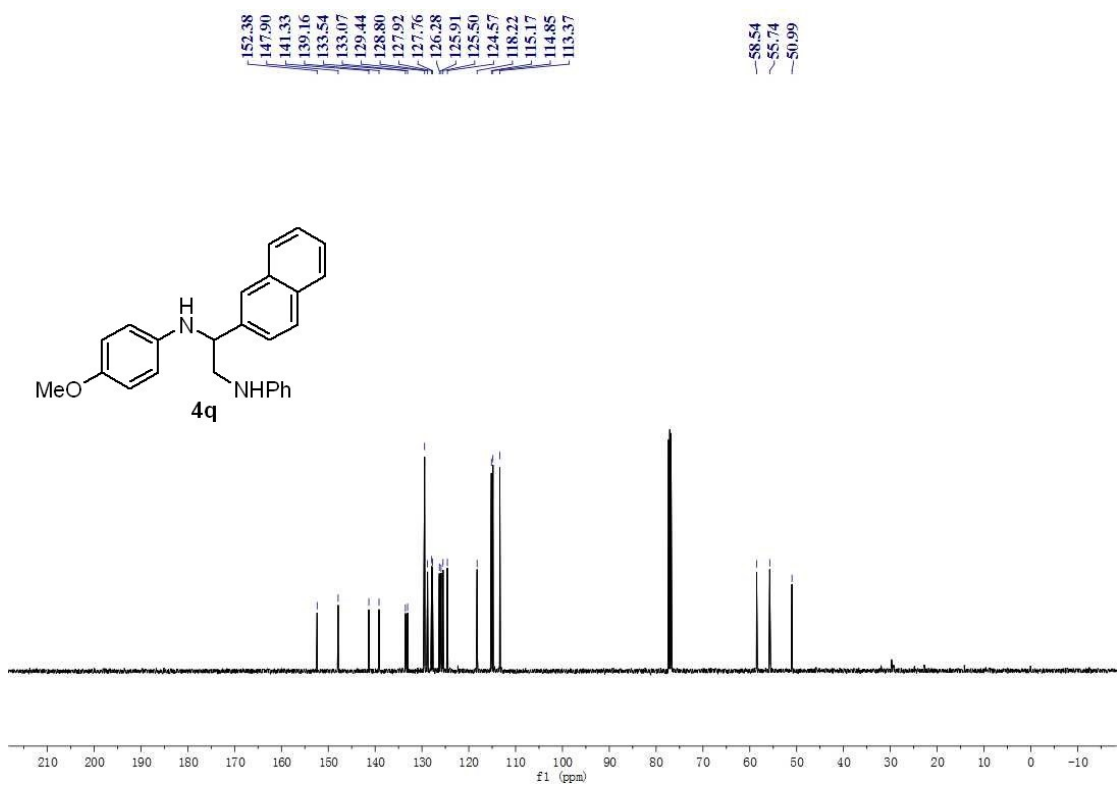

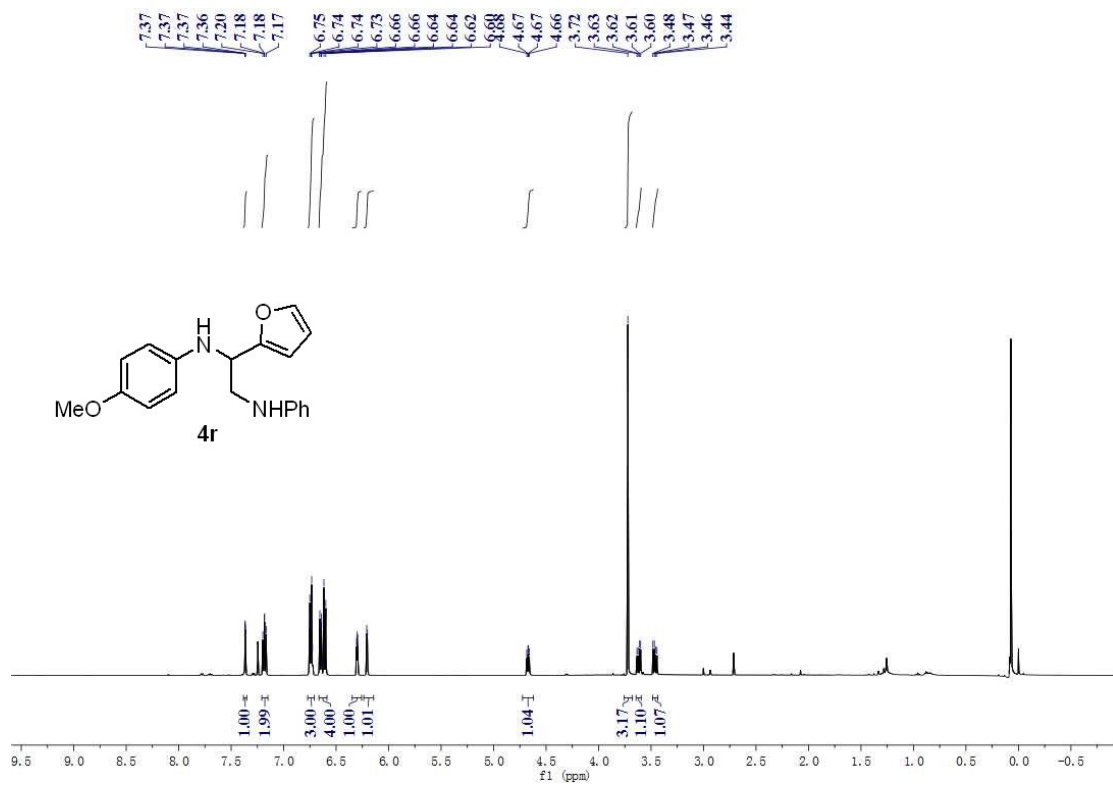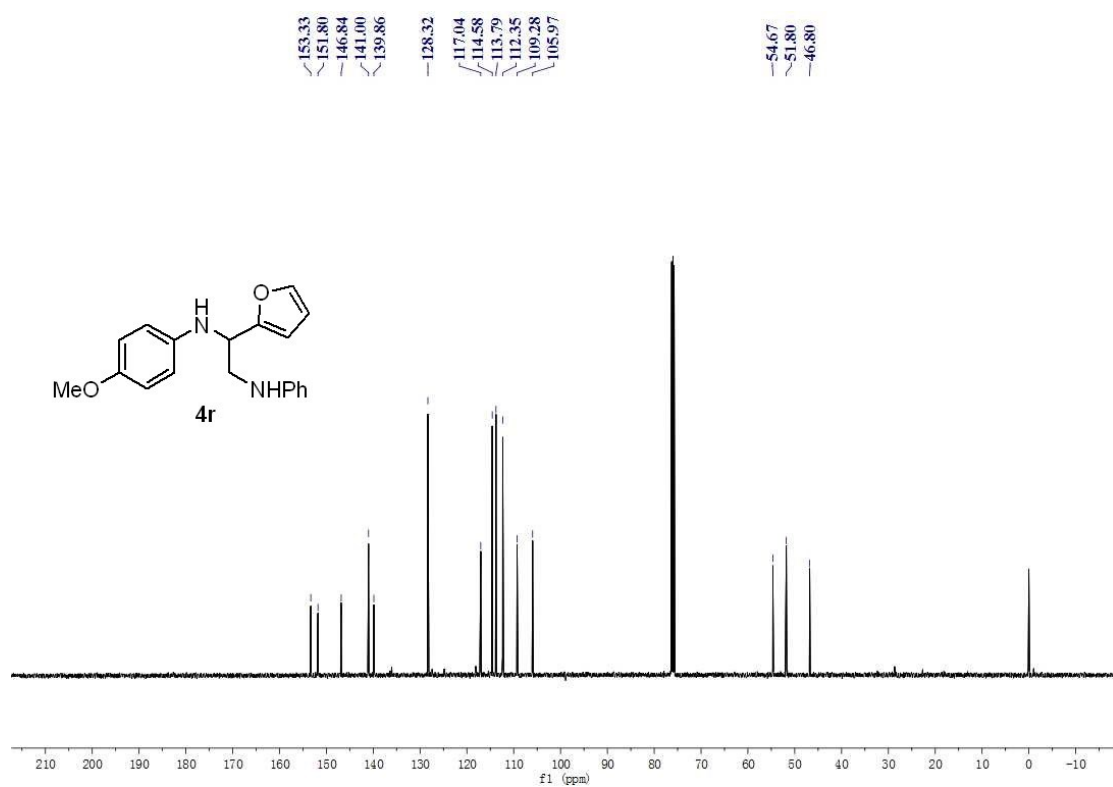

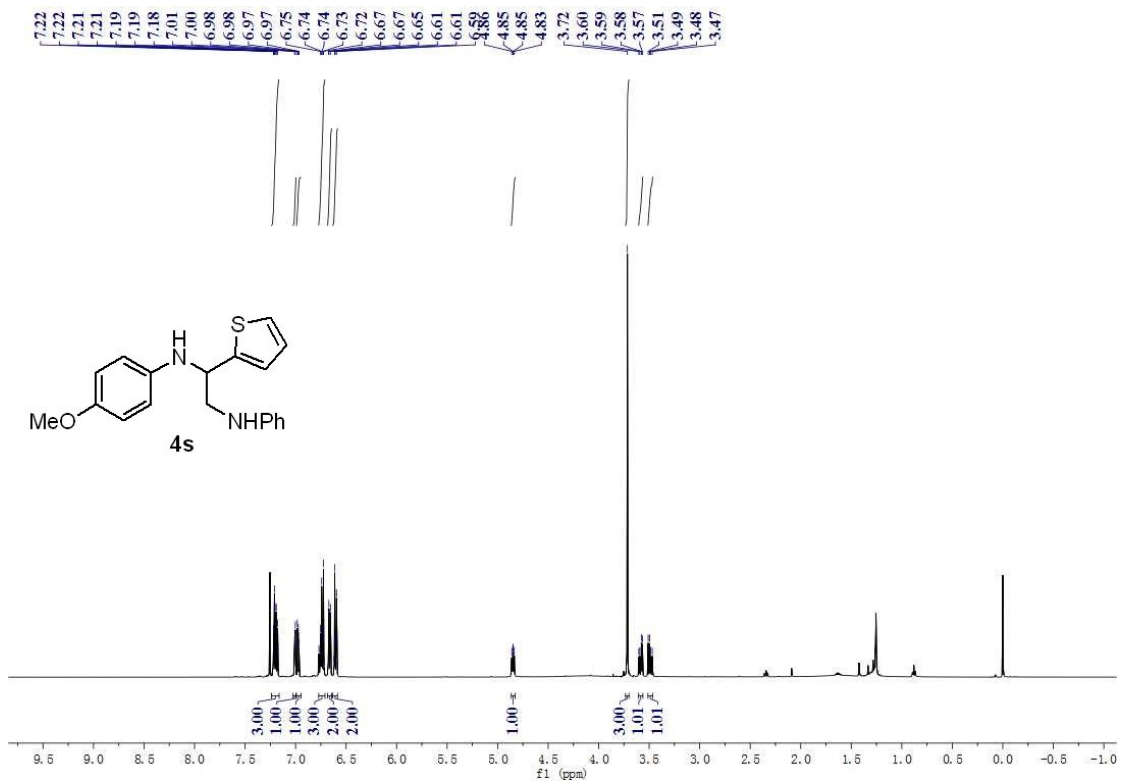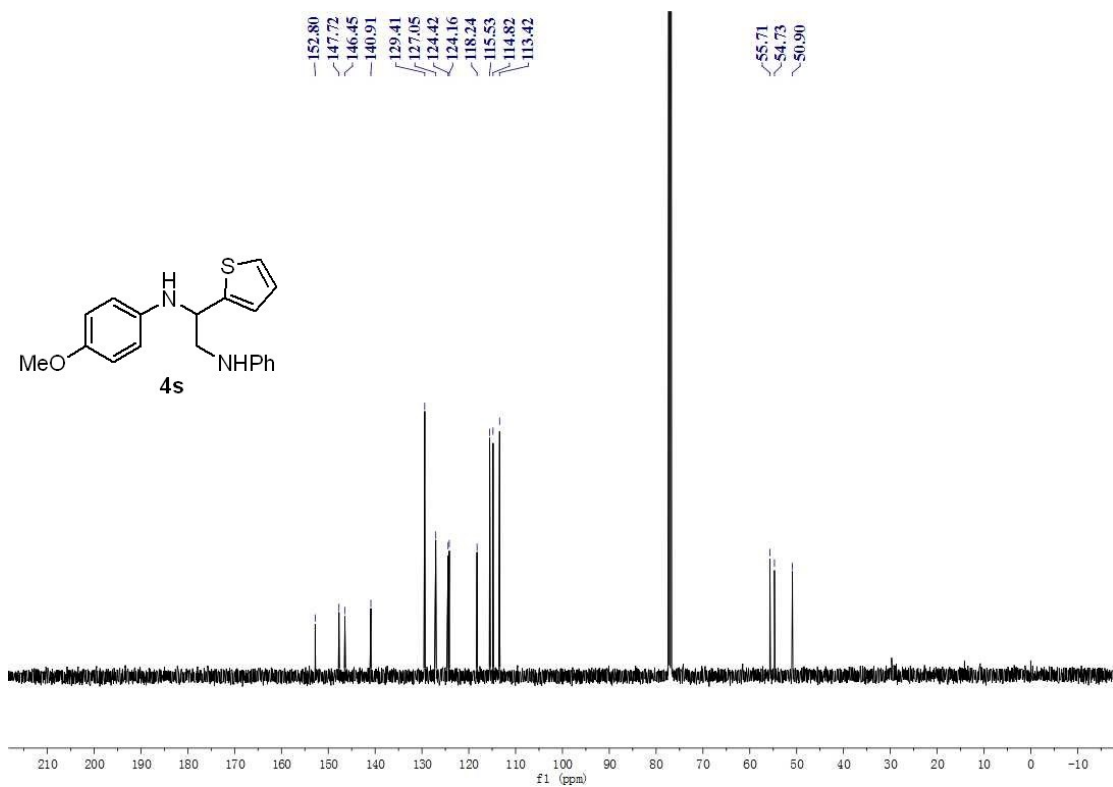

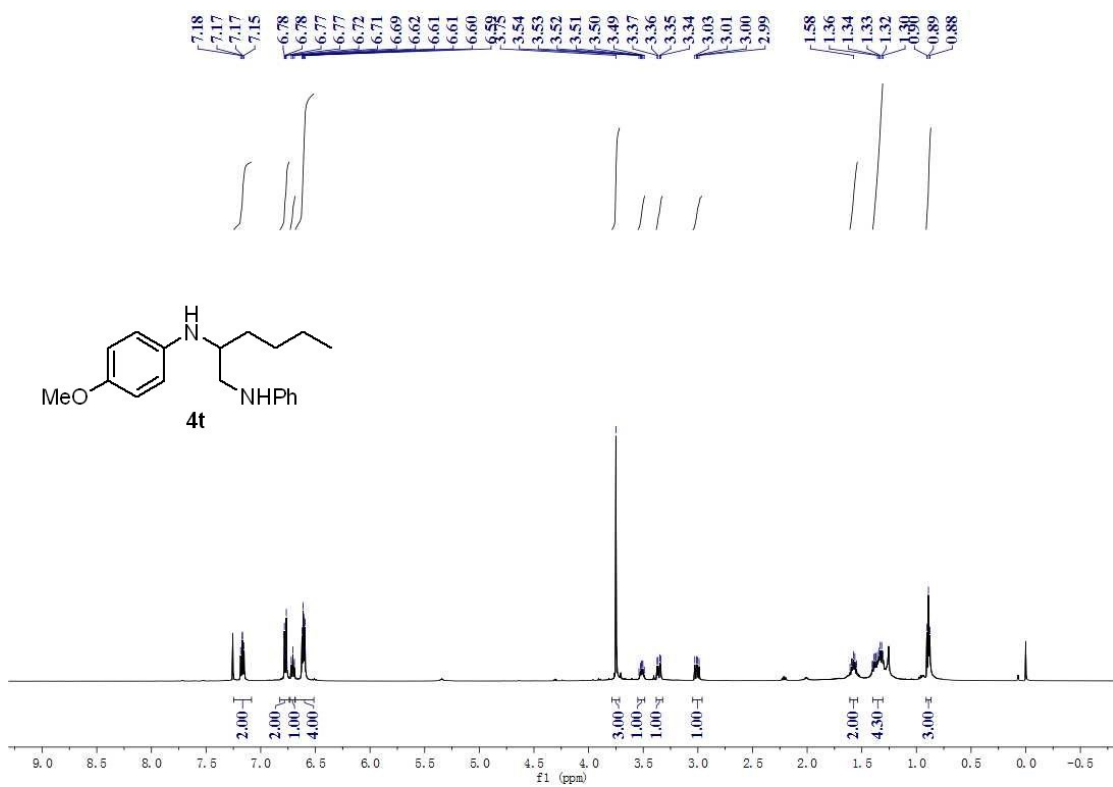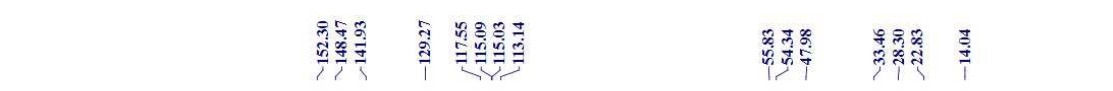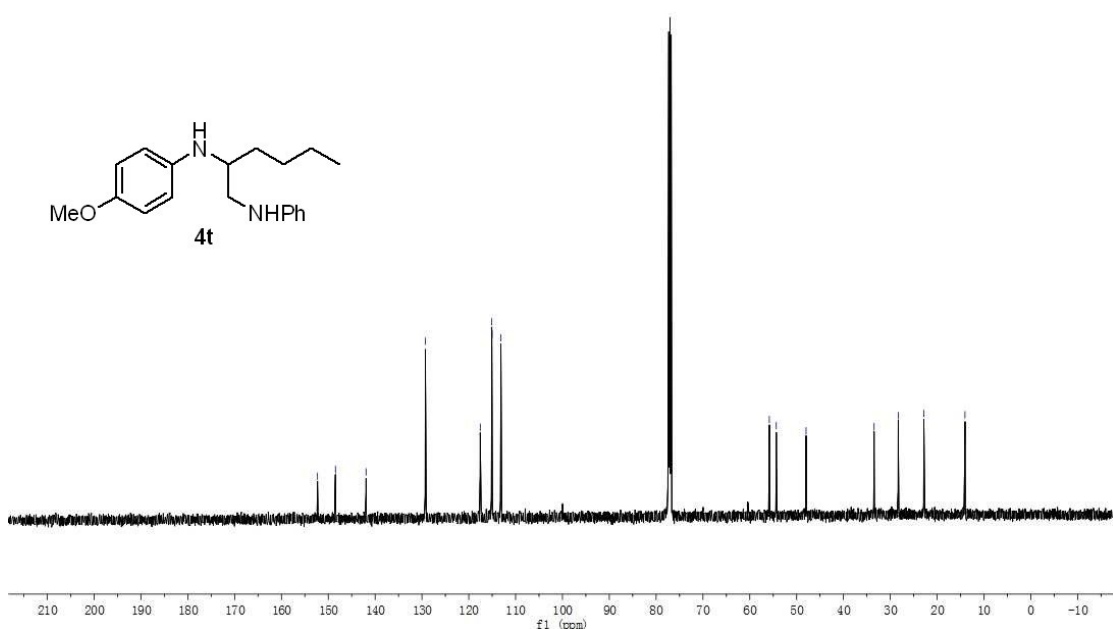

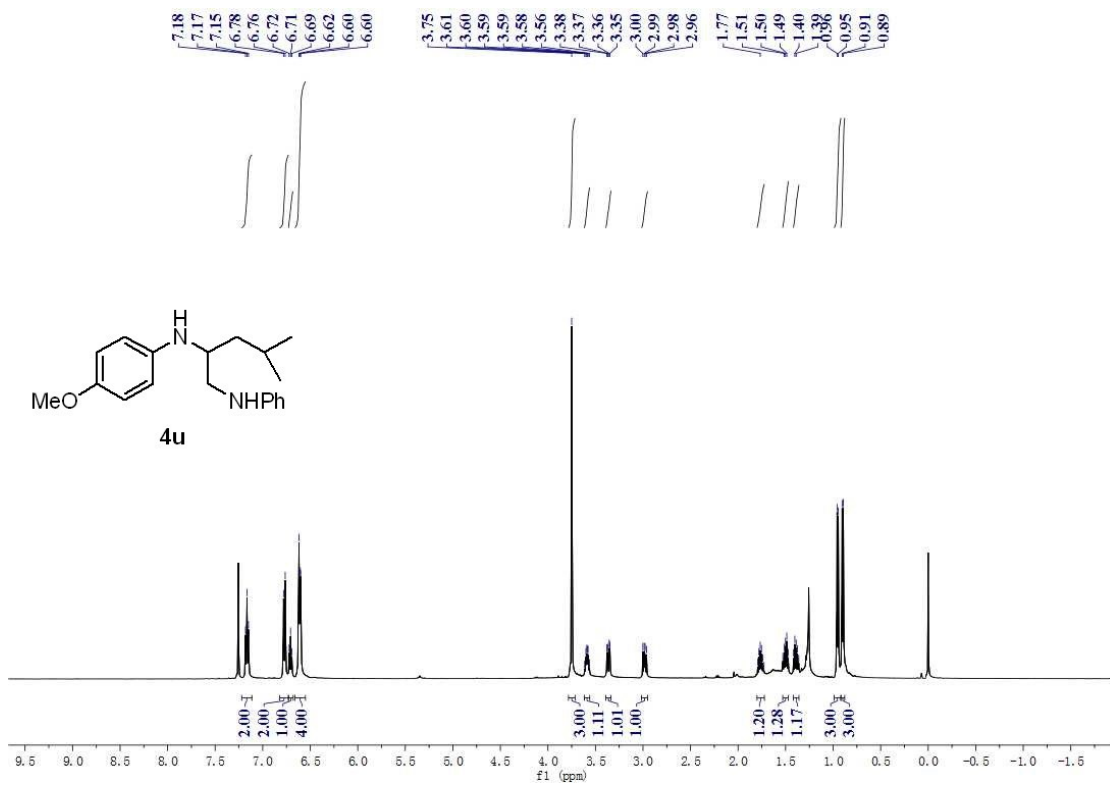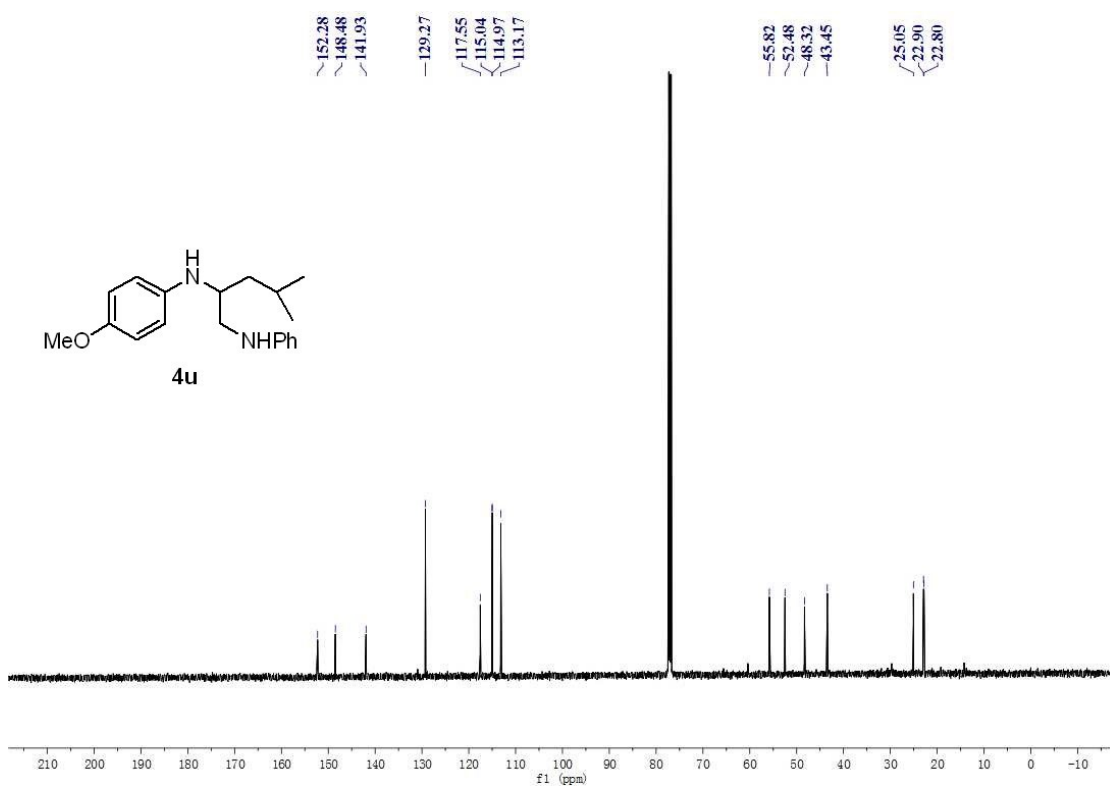



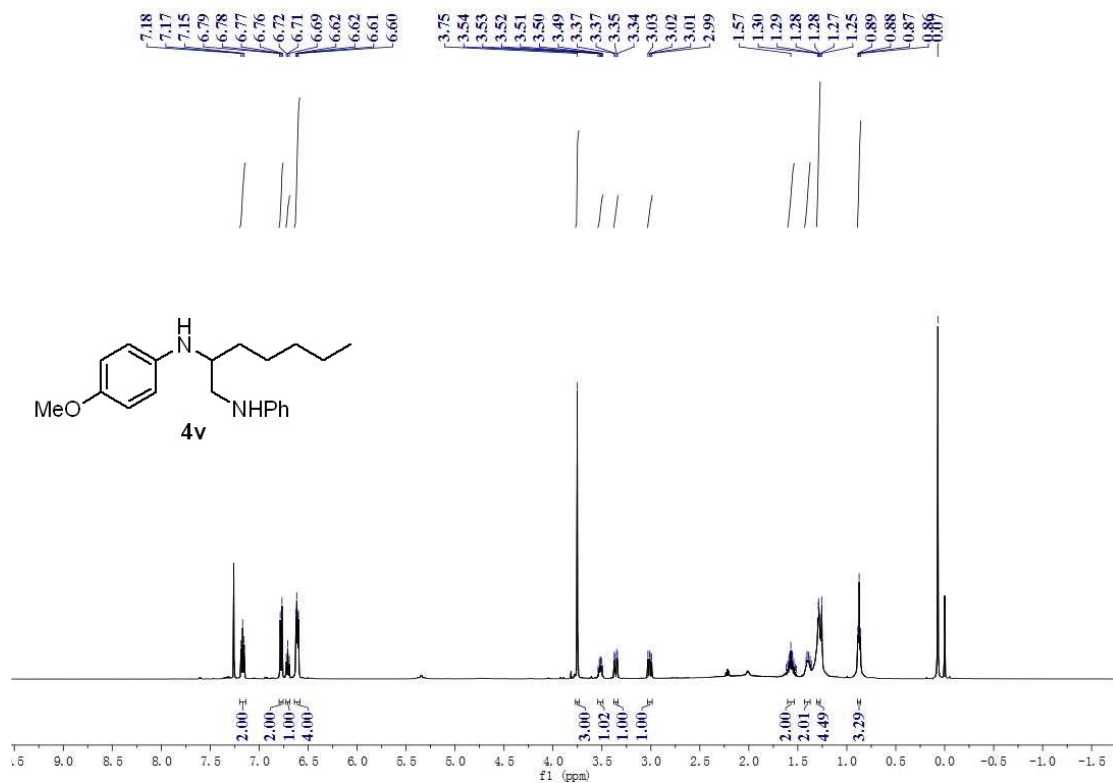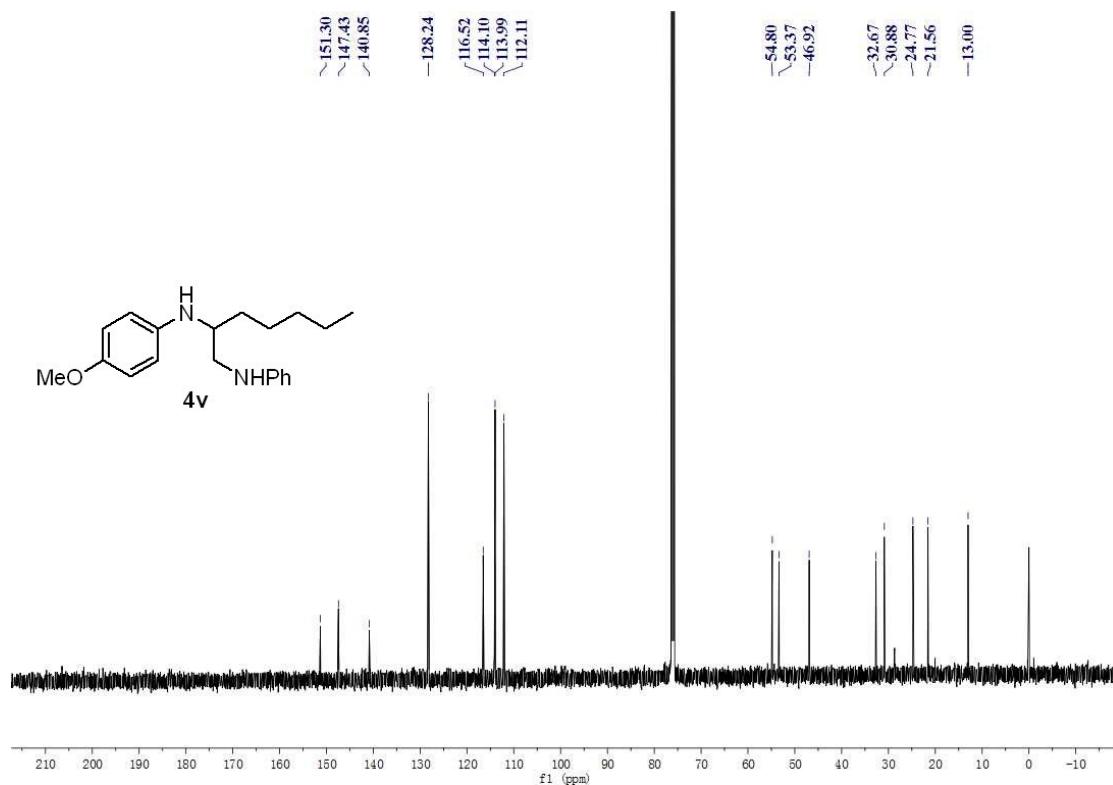

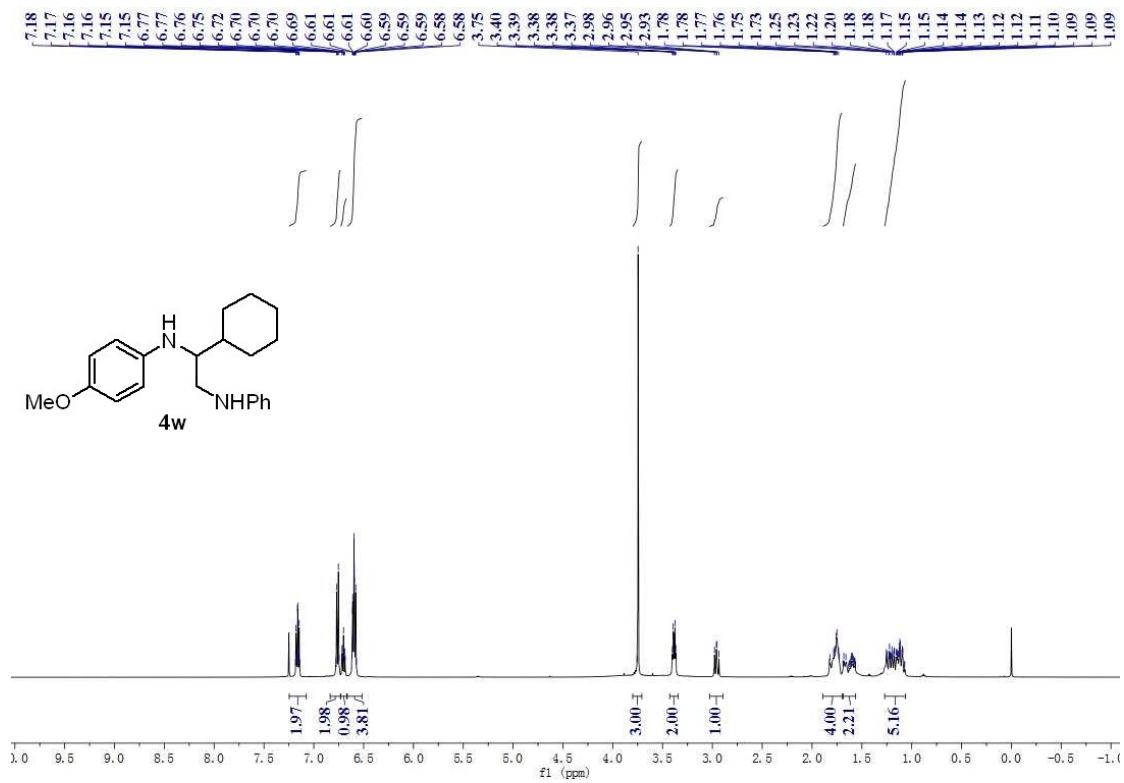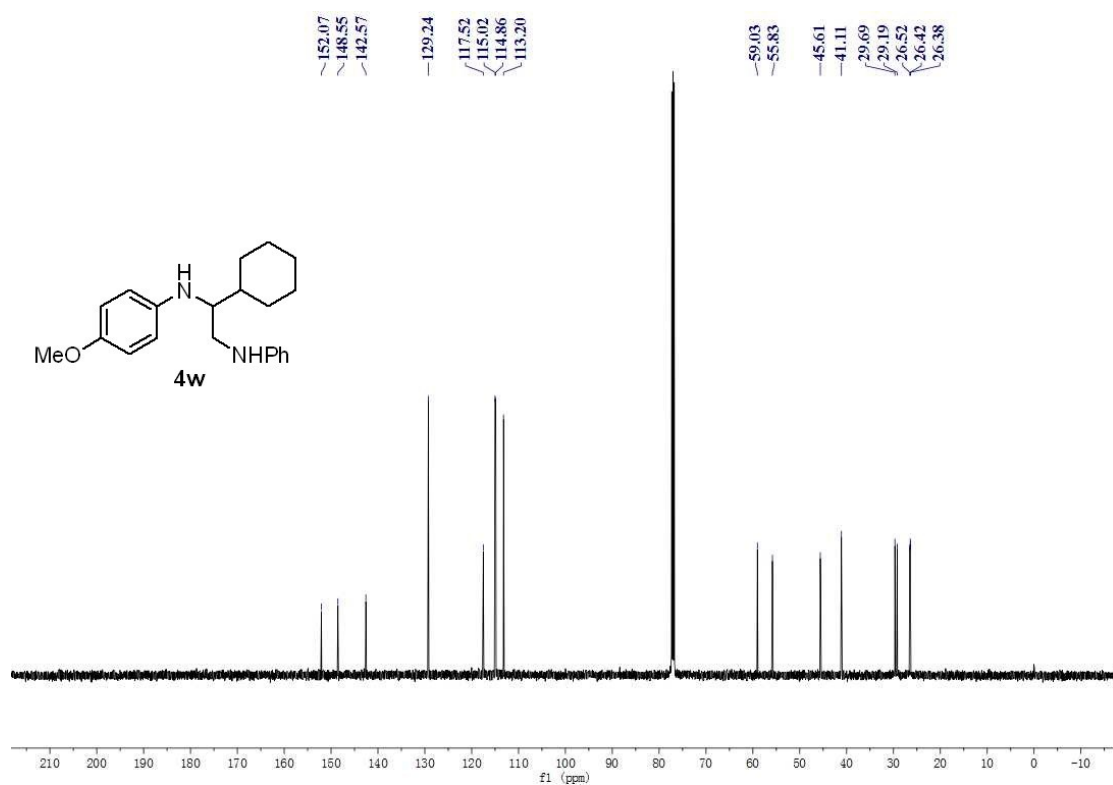

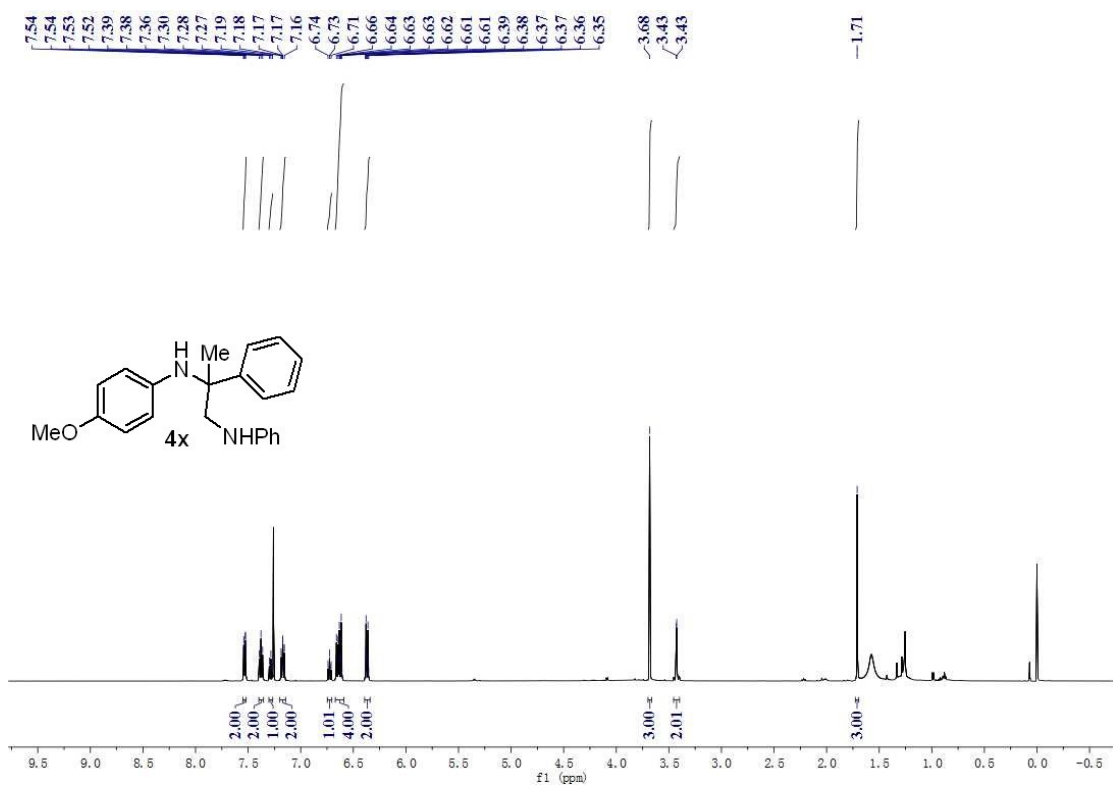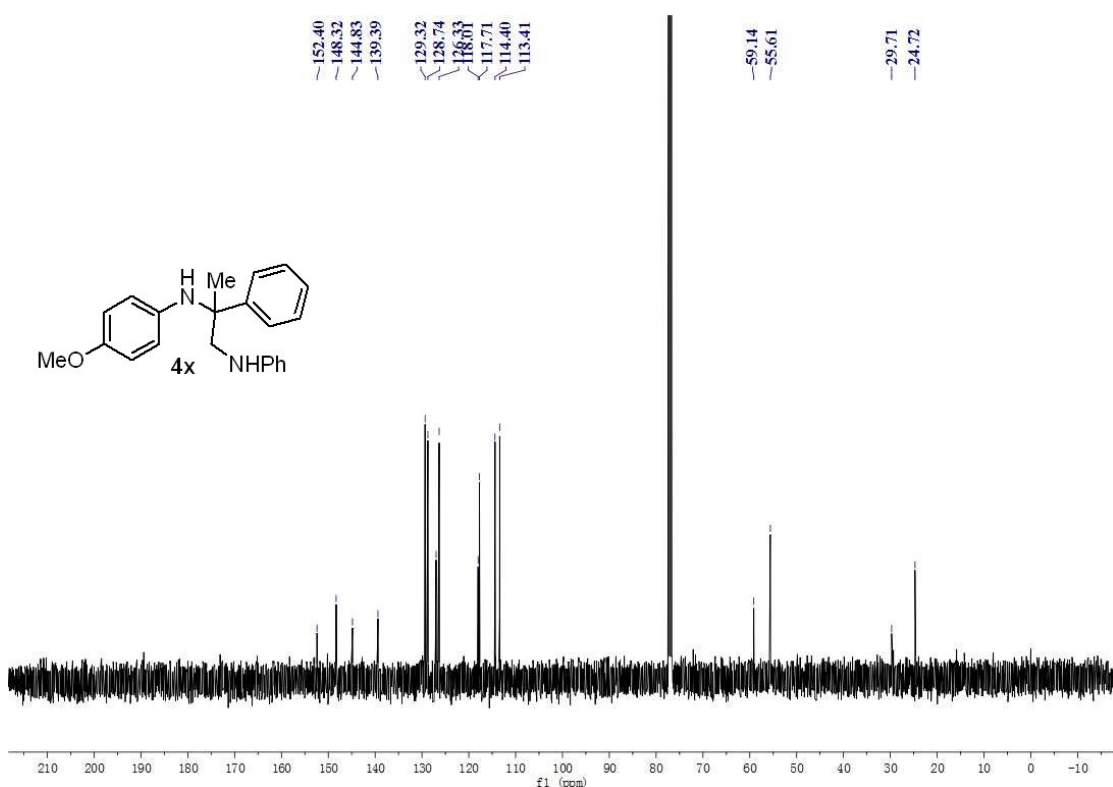

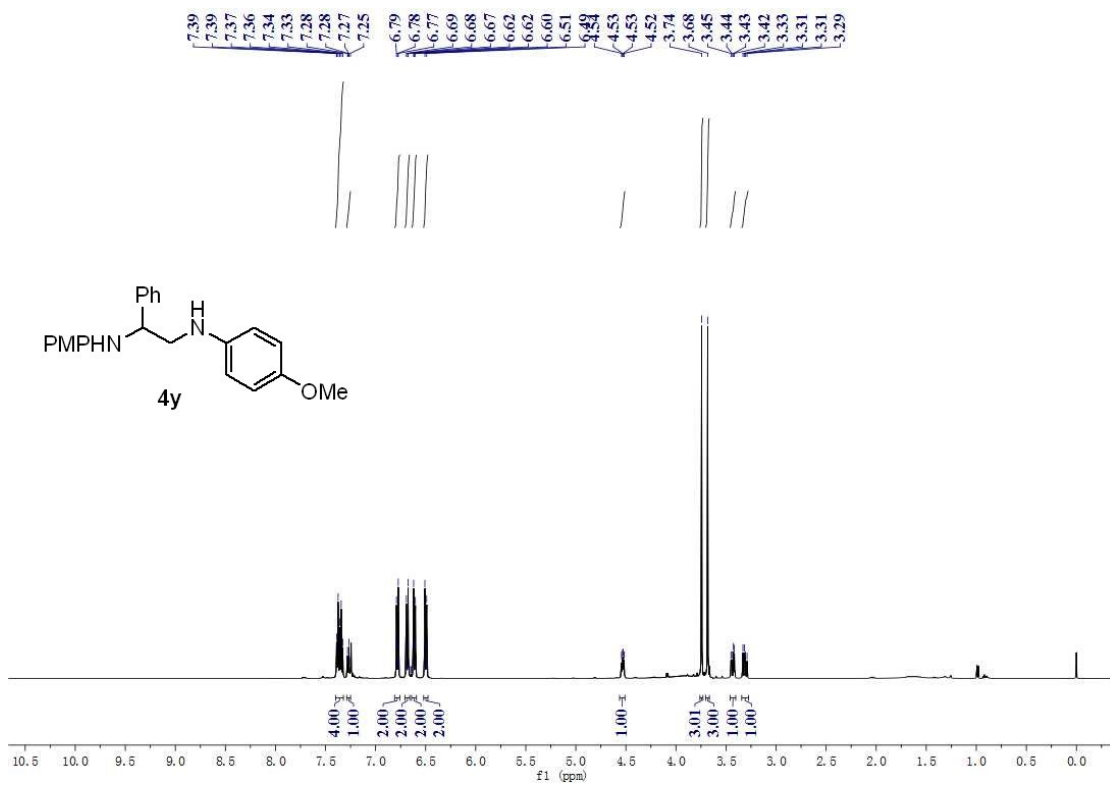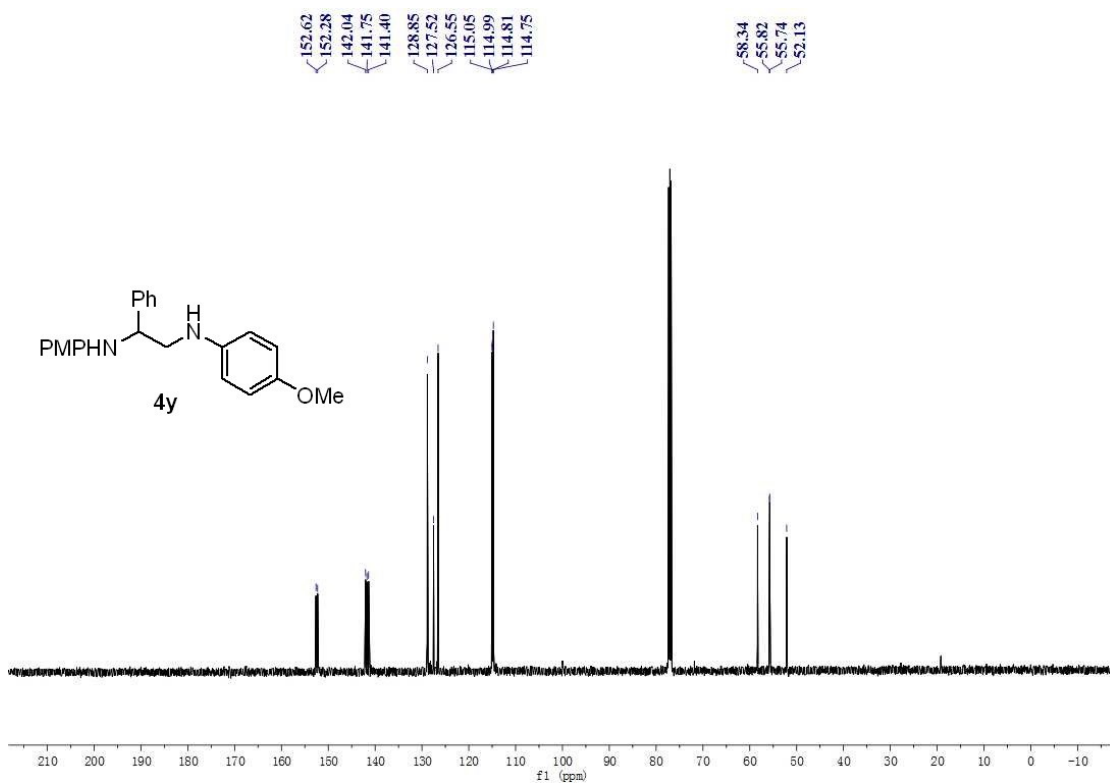

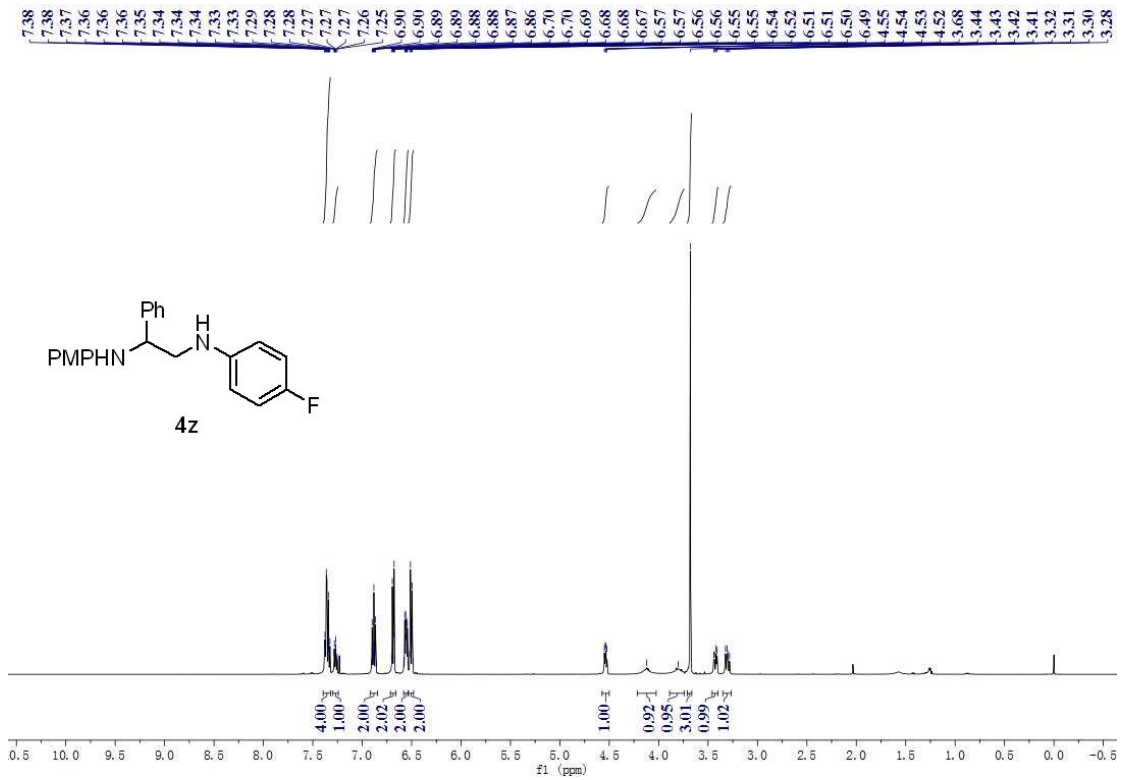

157.12  
155.25  
152.38  
144.24  
144.22  
141.52  
141.22  
128.90  
127.62  
126.52  
115.89  
115.72  
115.10  
114.84  
114.25  
114.19

58.24  
55.73  
51.72

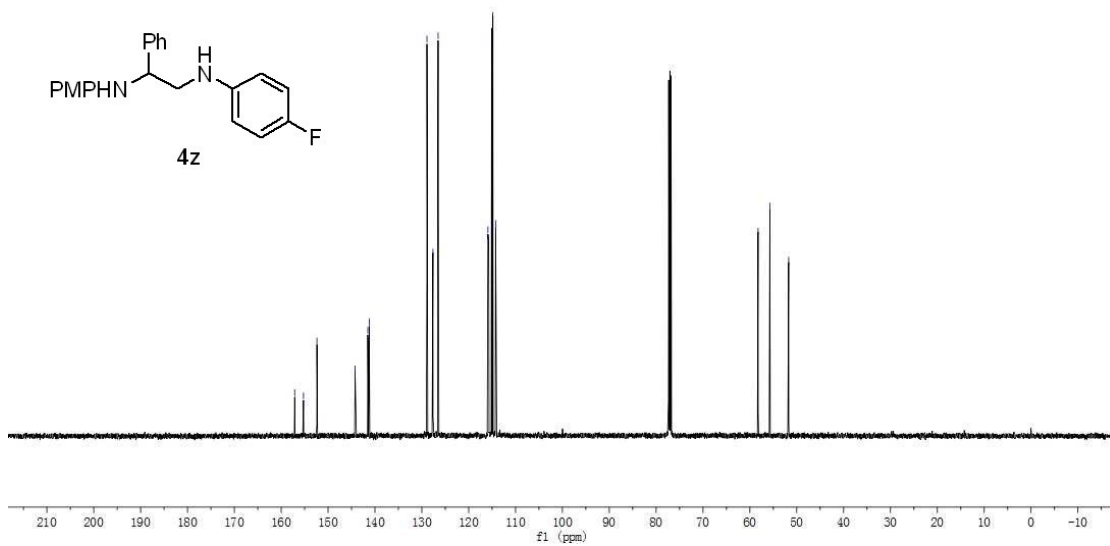

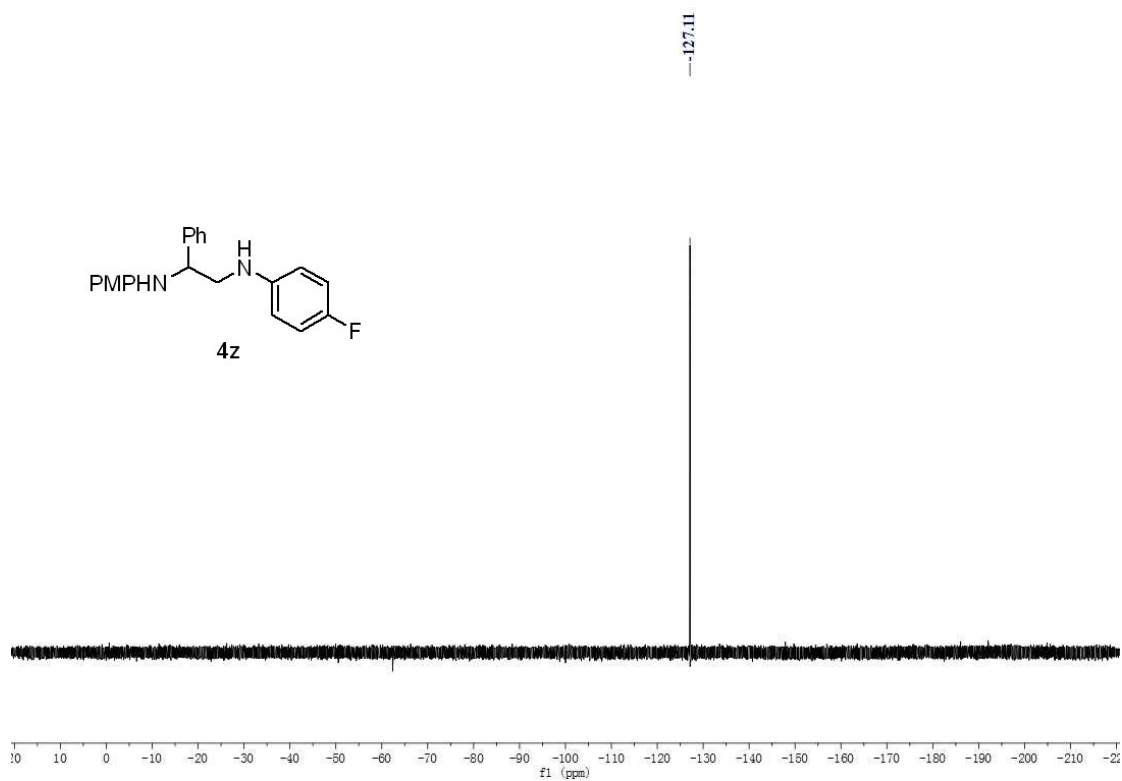

7.37  
7.36  
7.35  
7.33  
7.30  
7.29  
7.29  
7.27  
7.26  
7.26  
7.13  
7.13  
7.11  
7.10  
6.71  
6.70  
6.68  
6.55  
6.54  
6.53  
6.52  
6.52  
6.50  
4.55  
4.54  
4.53  
3.95  
3.69  
3.46  
3.45  
3.43  
3.43  
3.35  
3.33  
3.32  
3.31

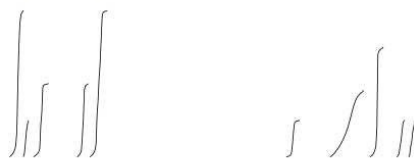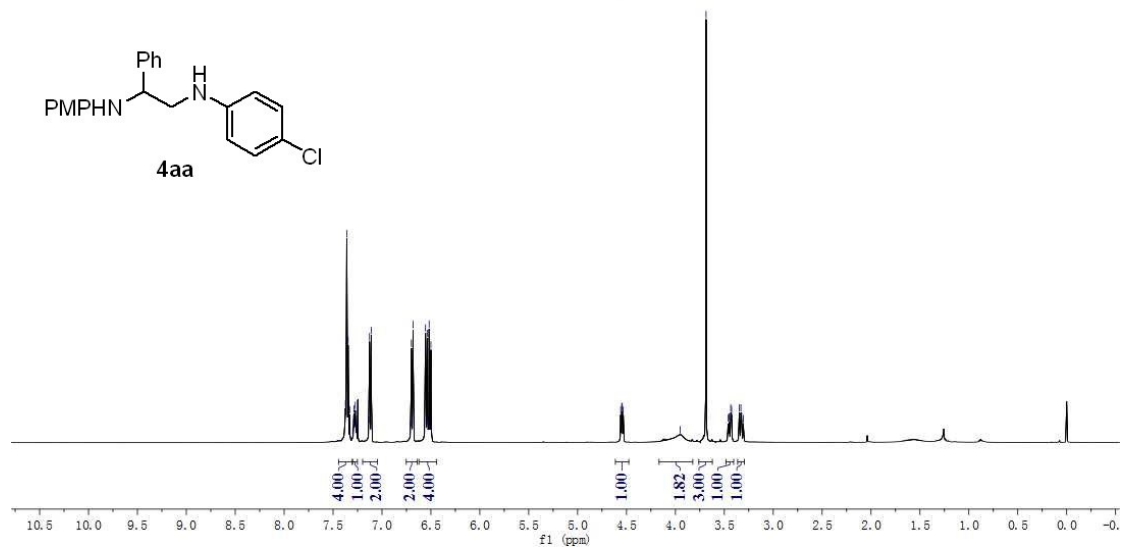

4.00  
1.00  
2.00  
2.00  
4.00  
1.00  
1.82  
3.00  
1.00  
1.00

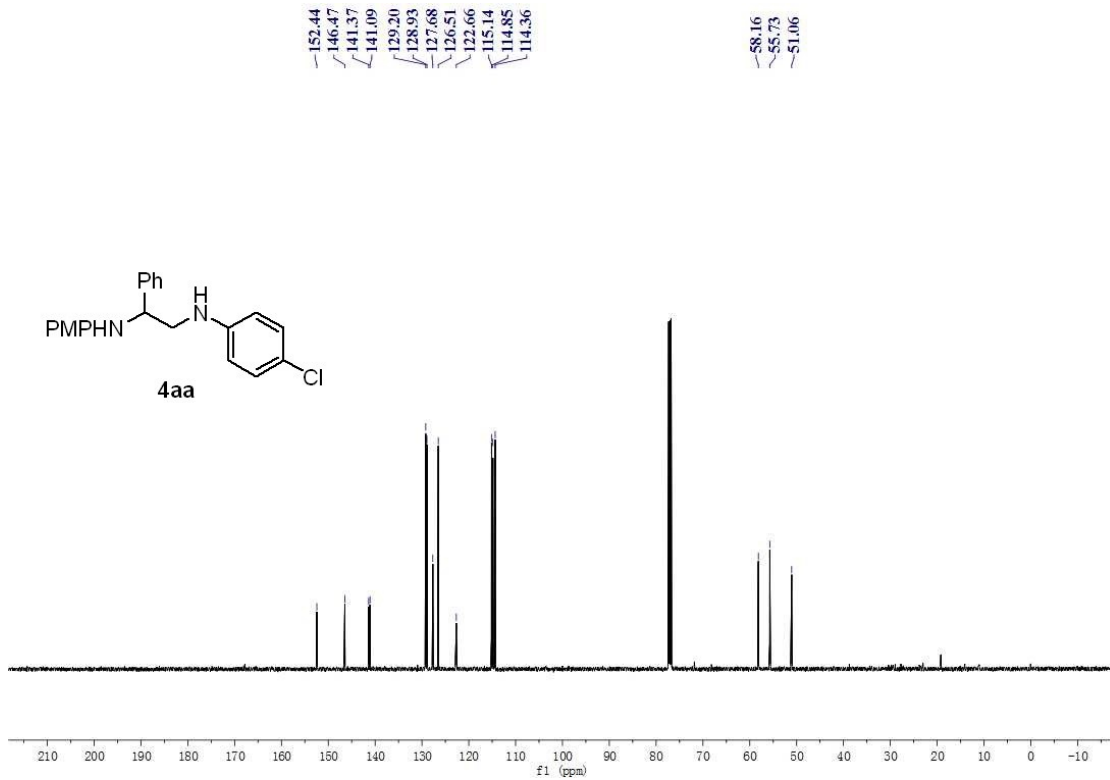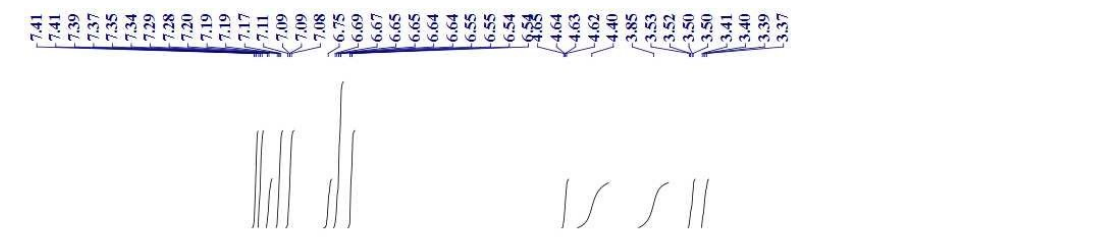

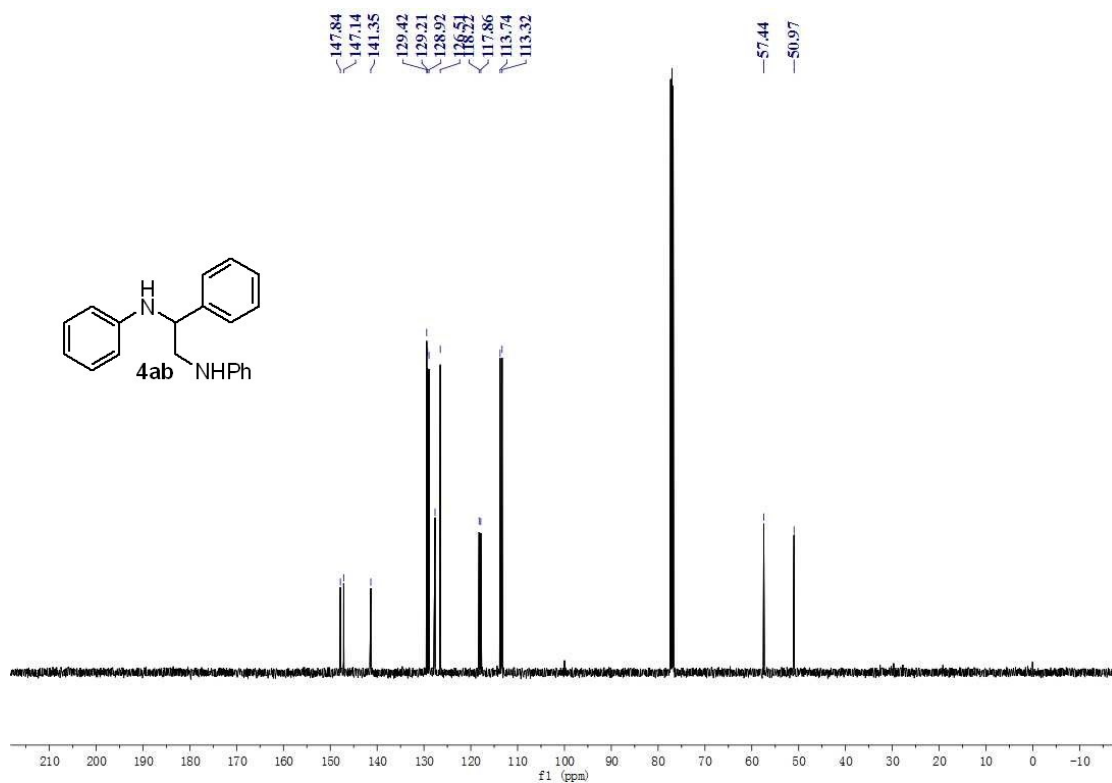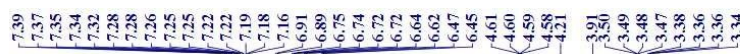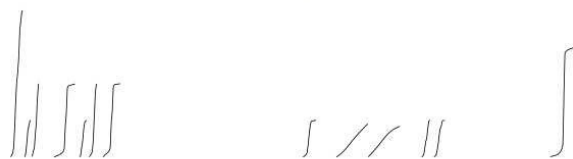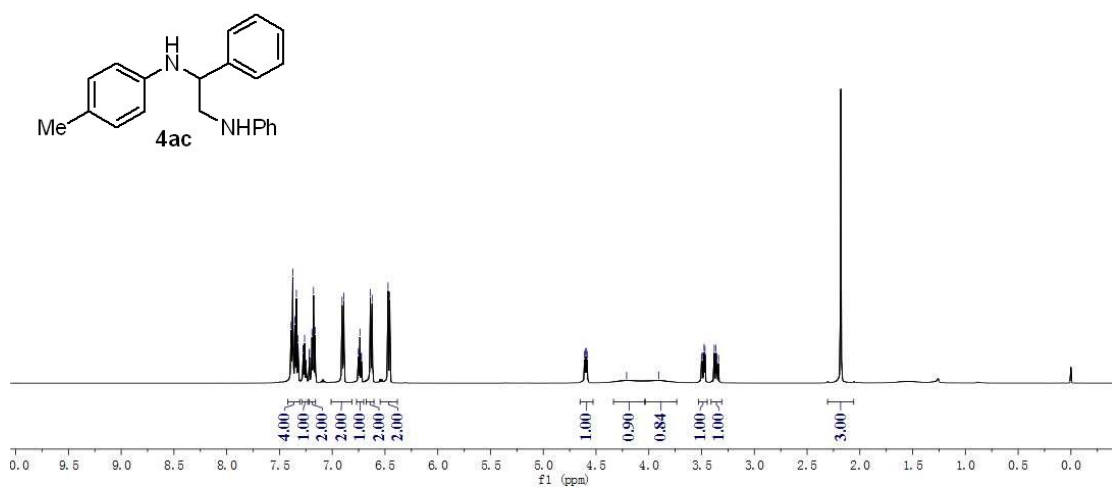



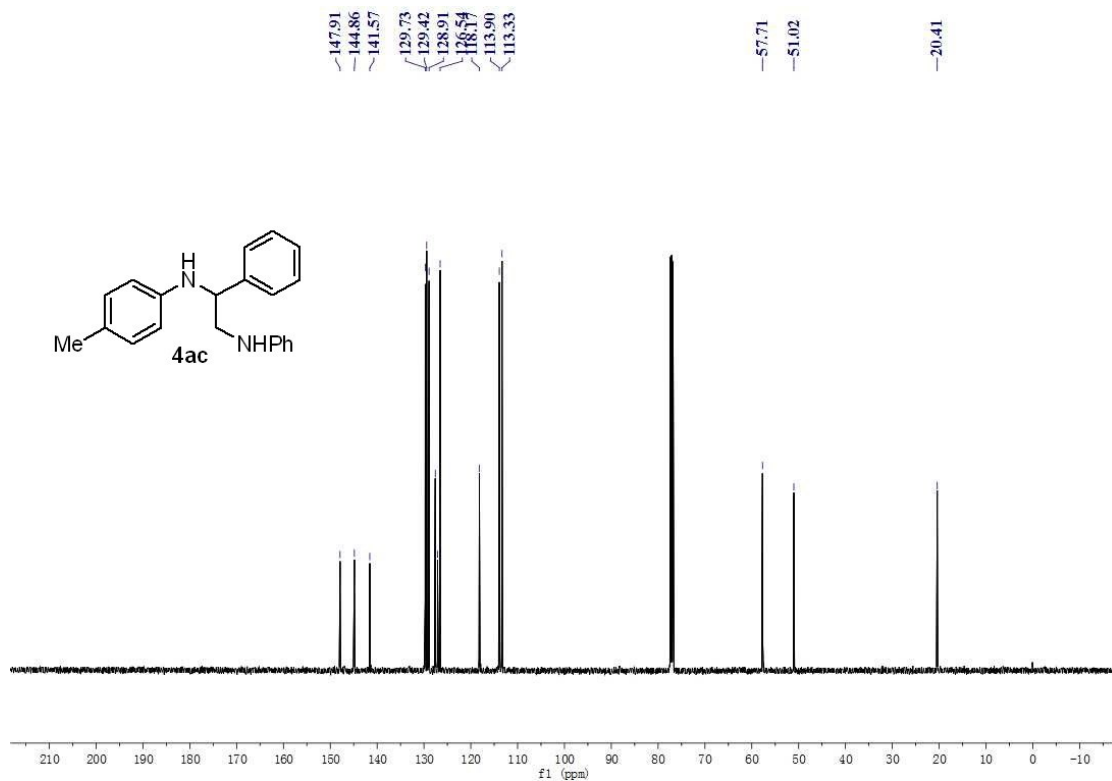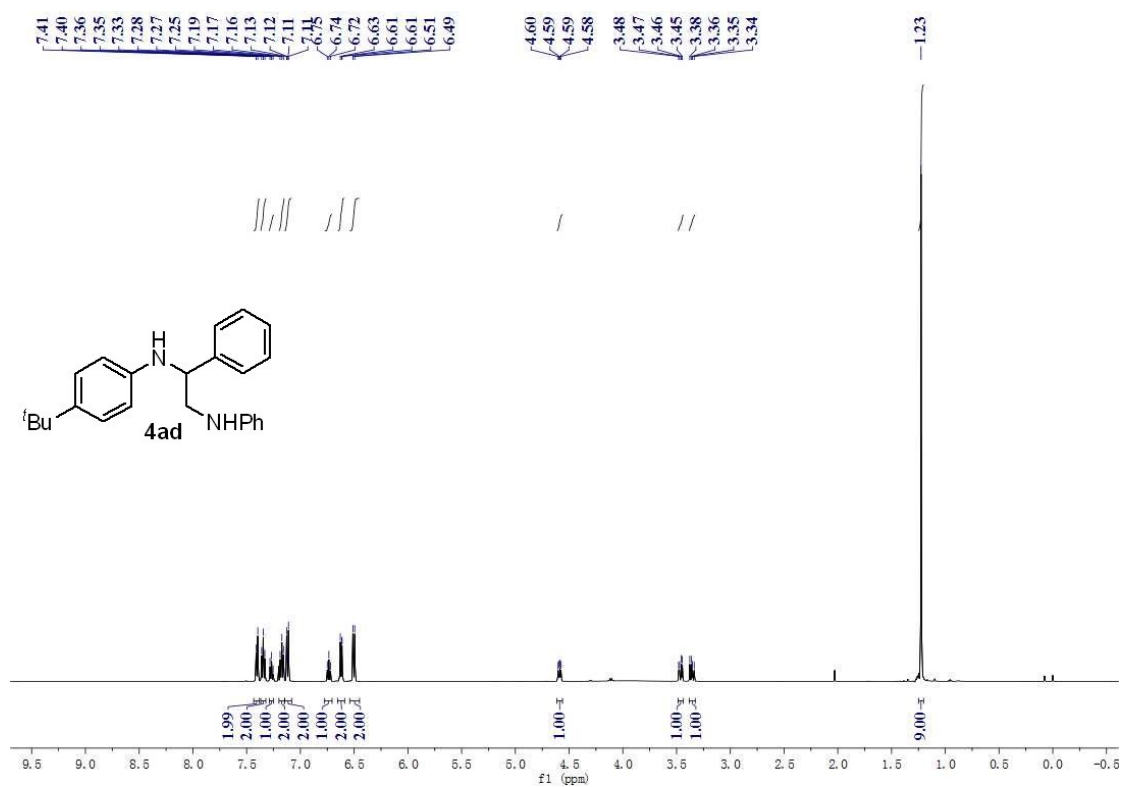

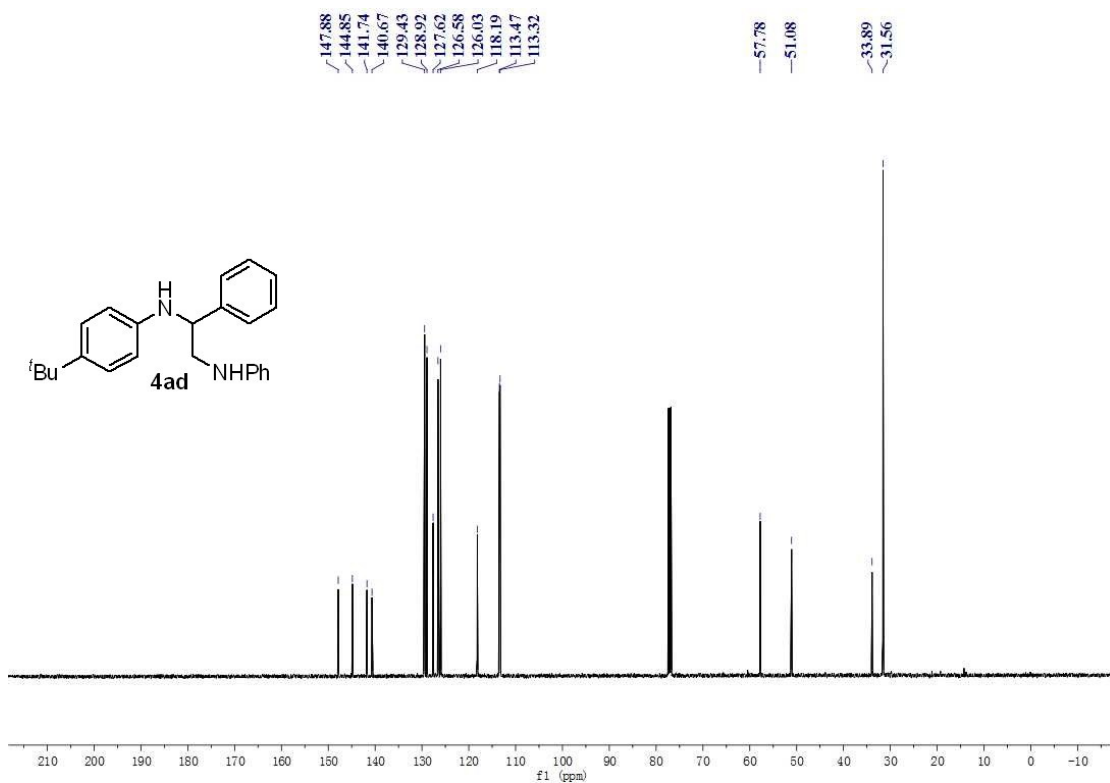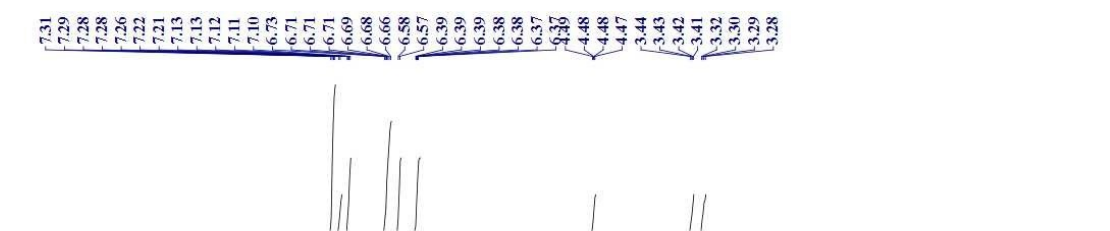

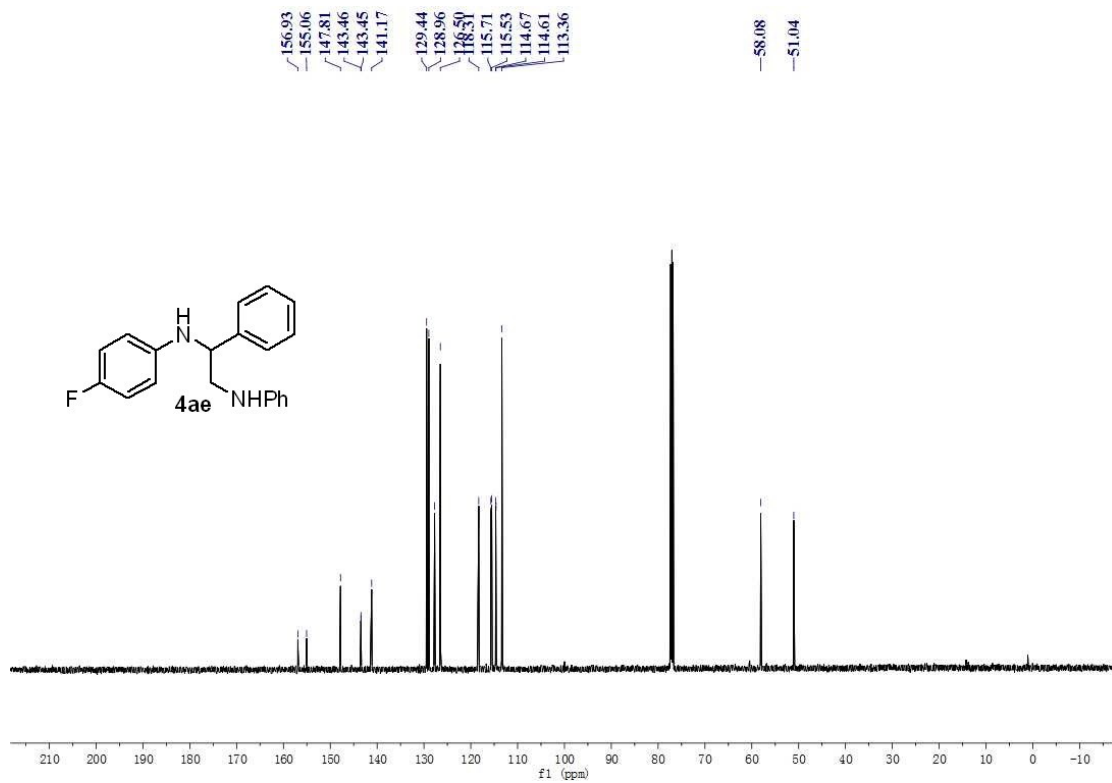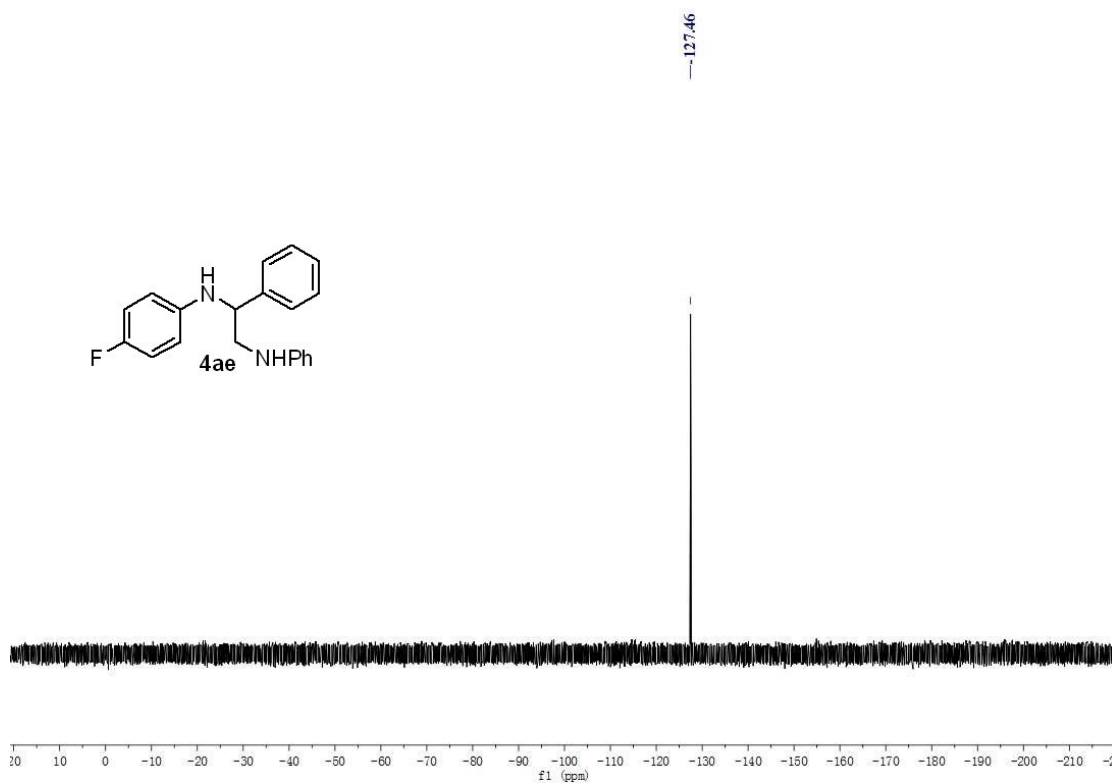

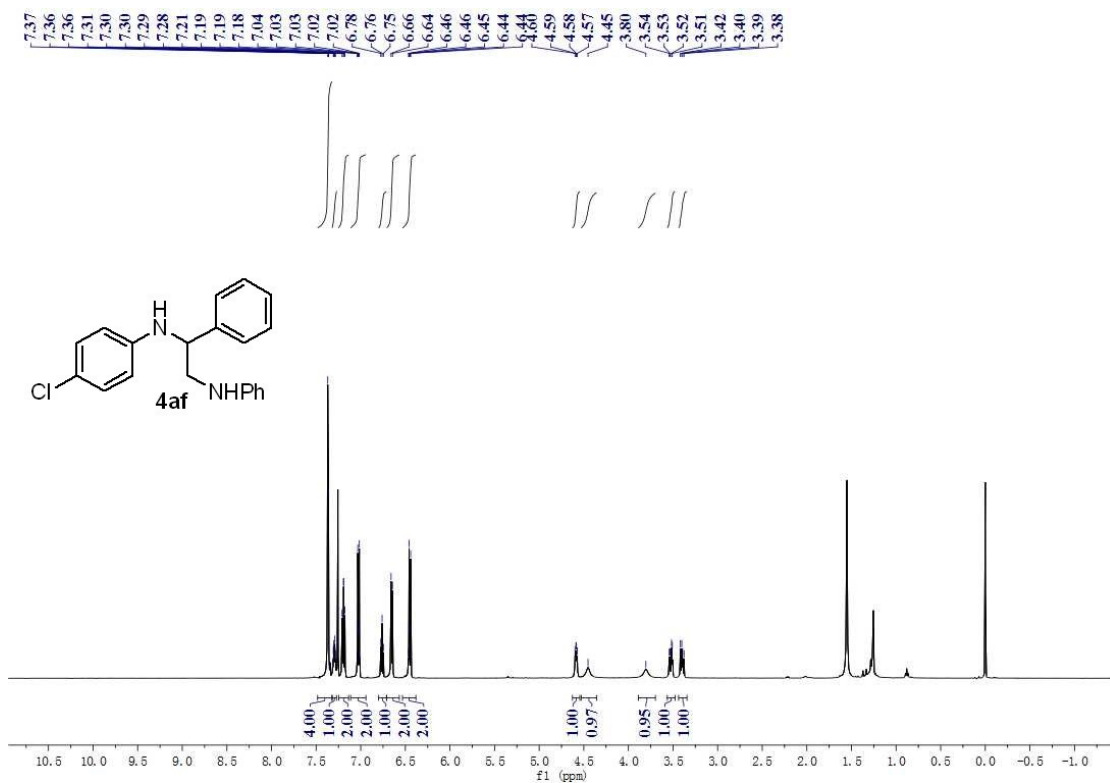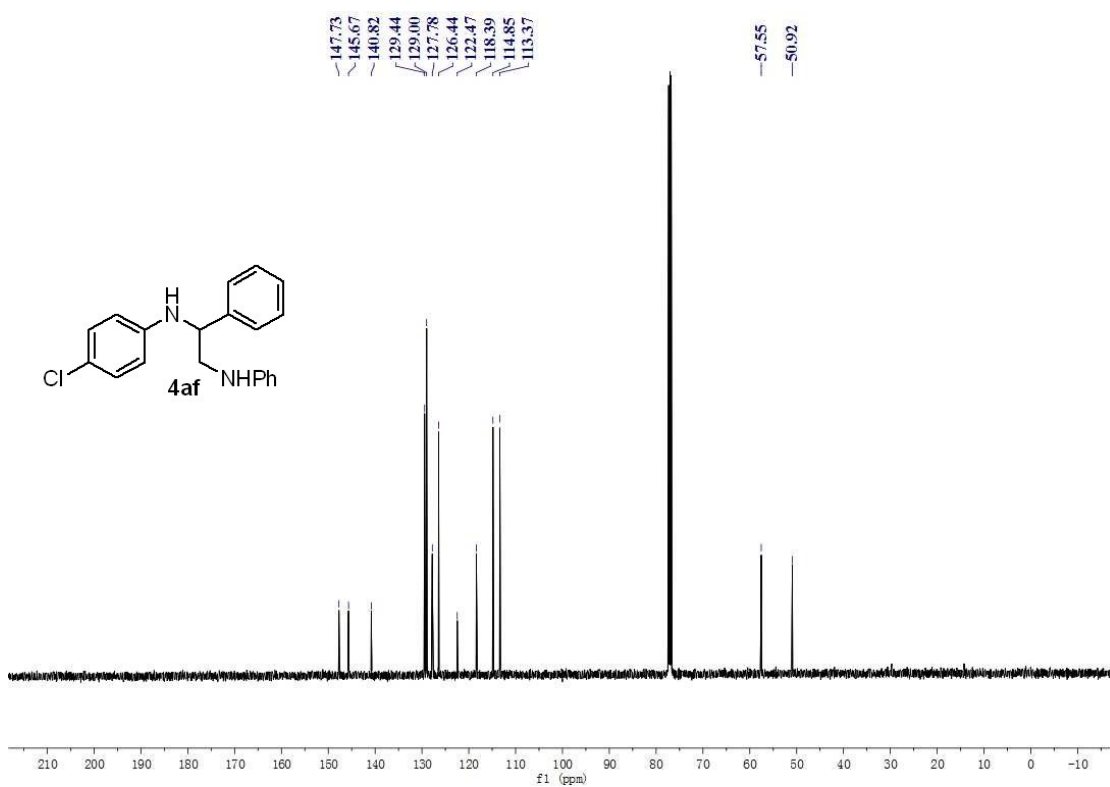

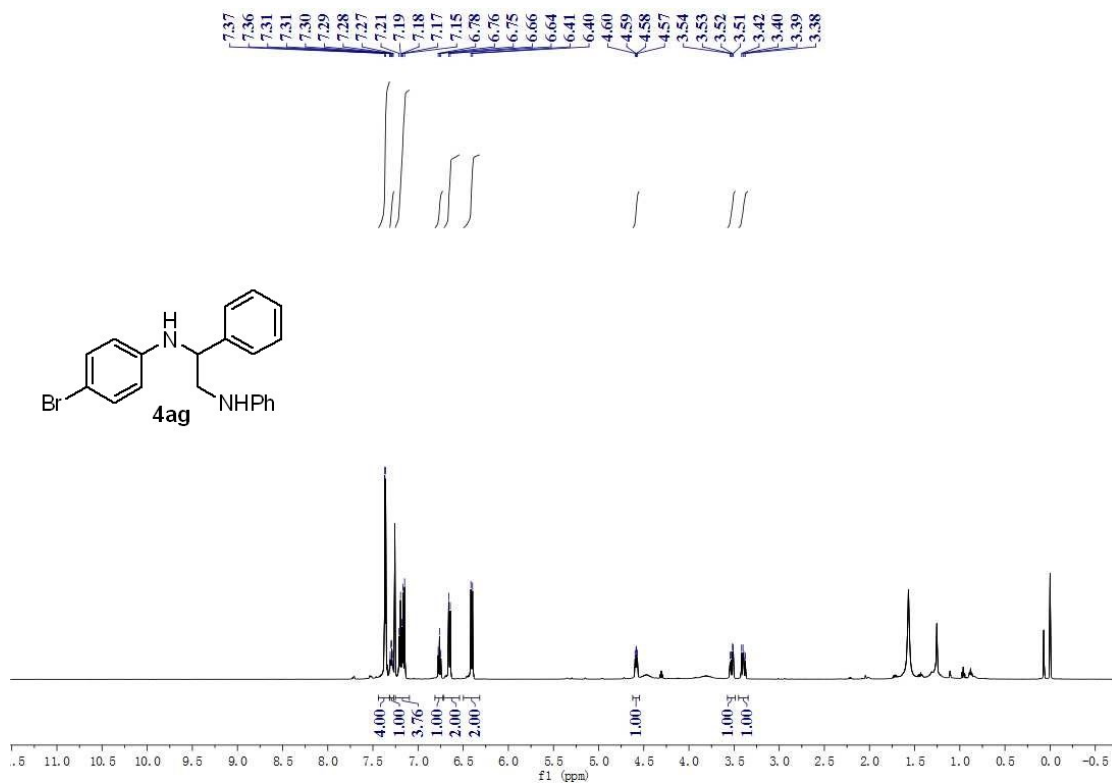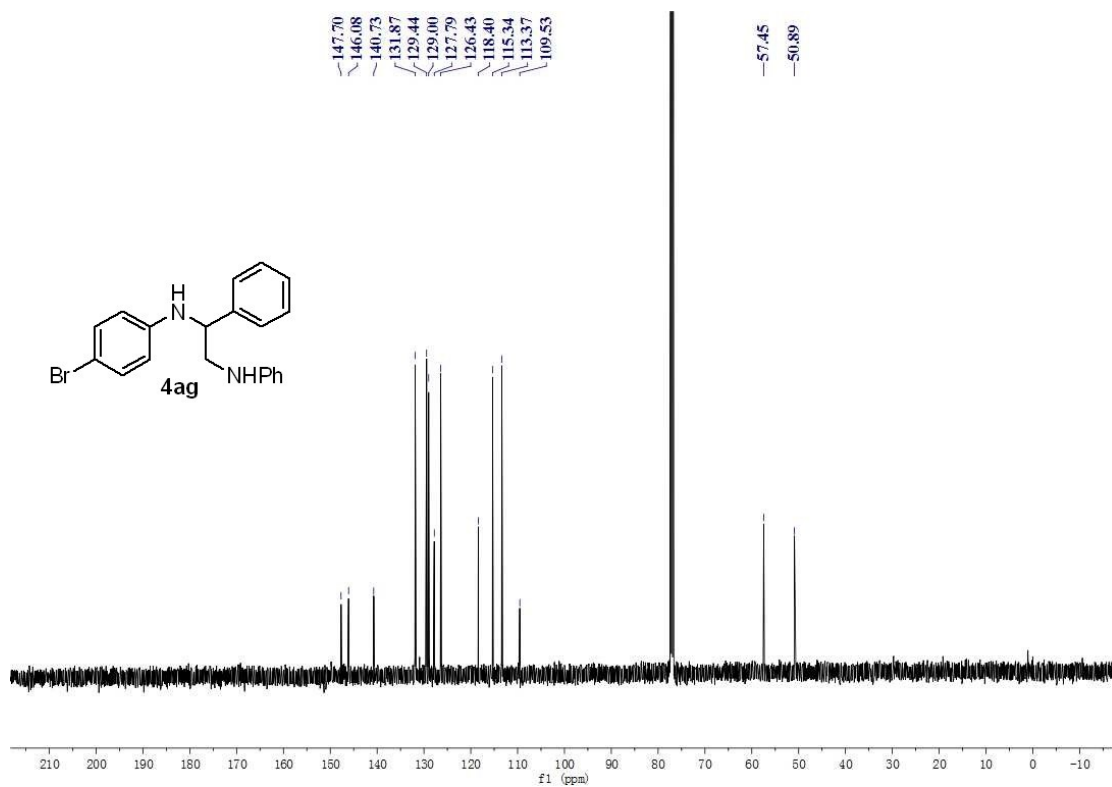

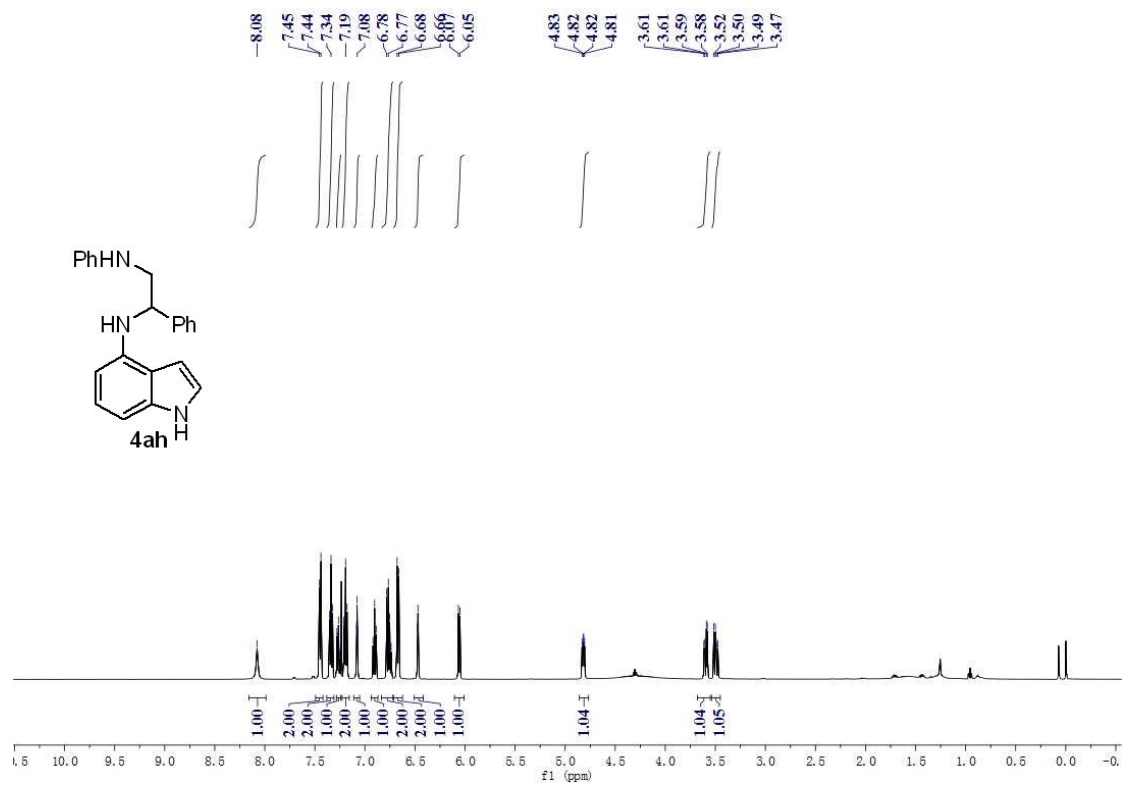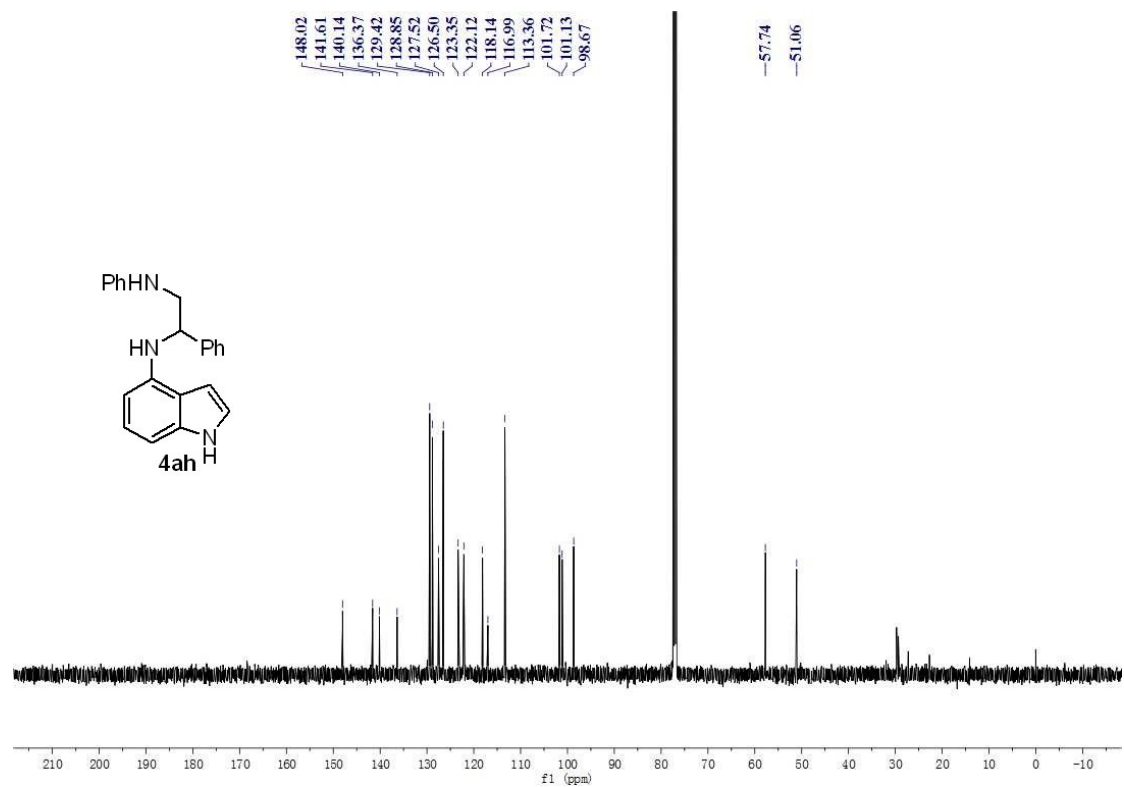

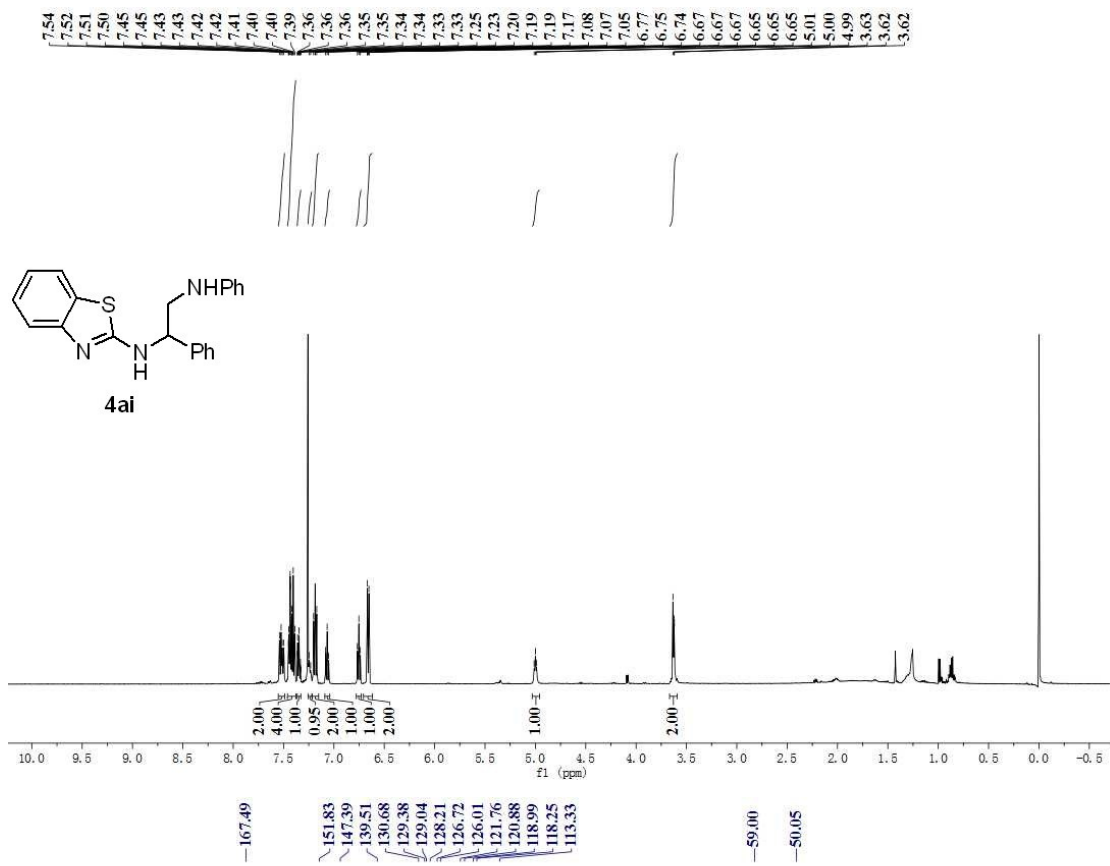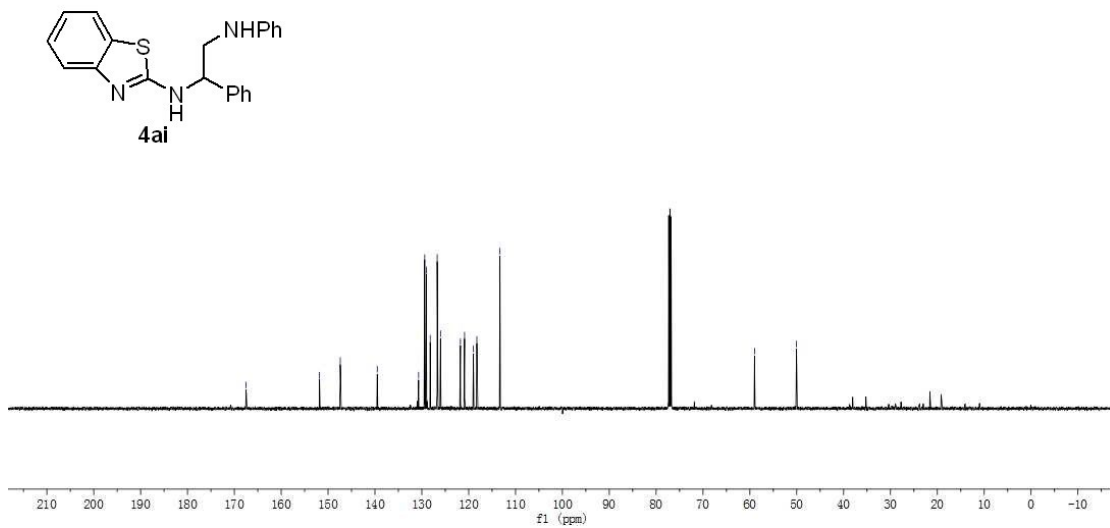

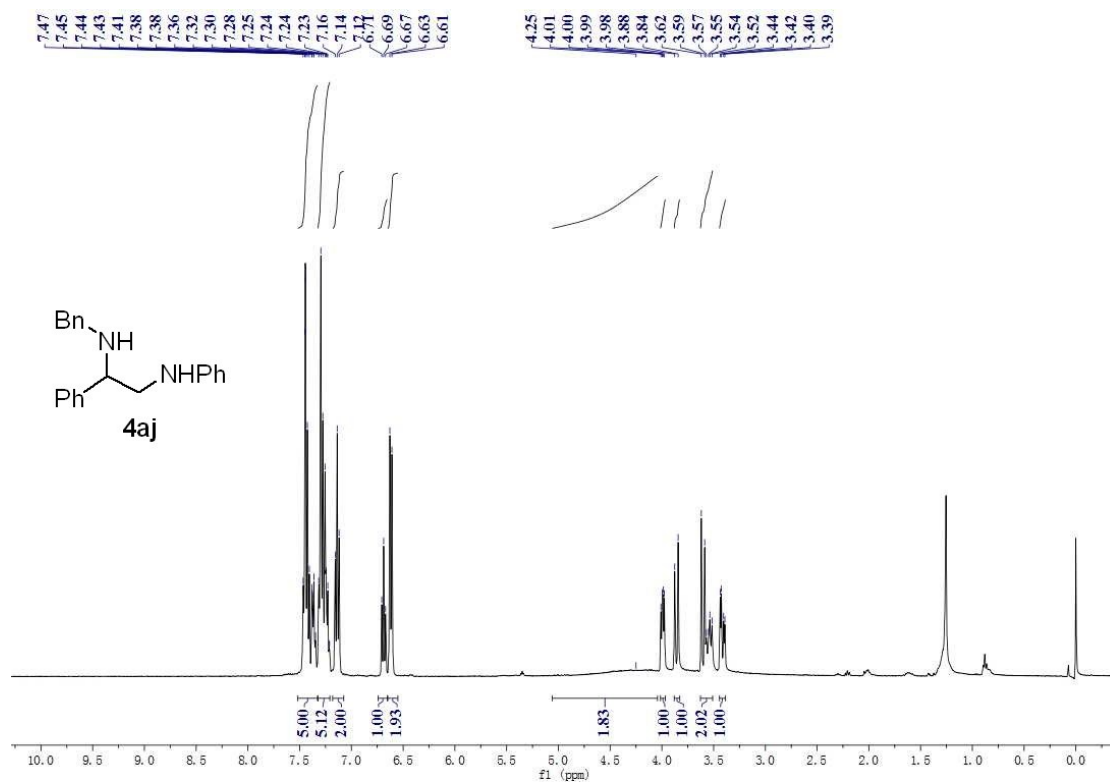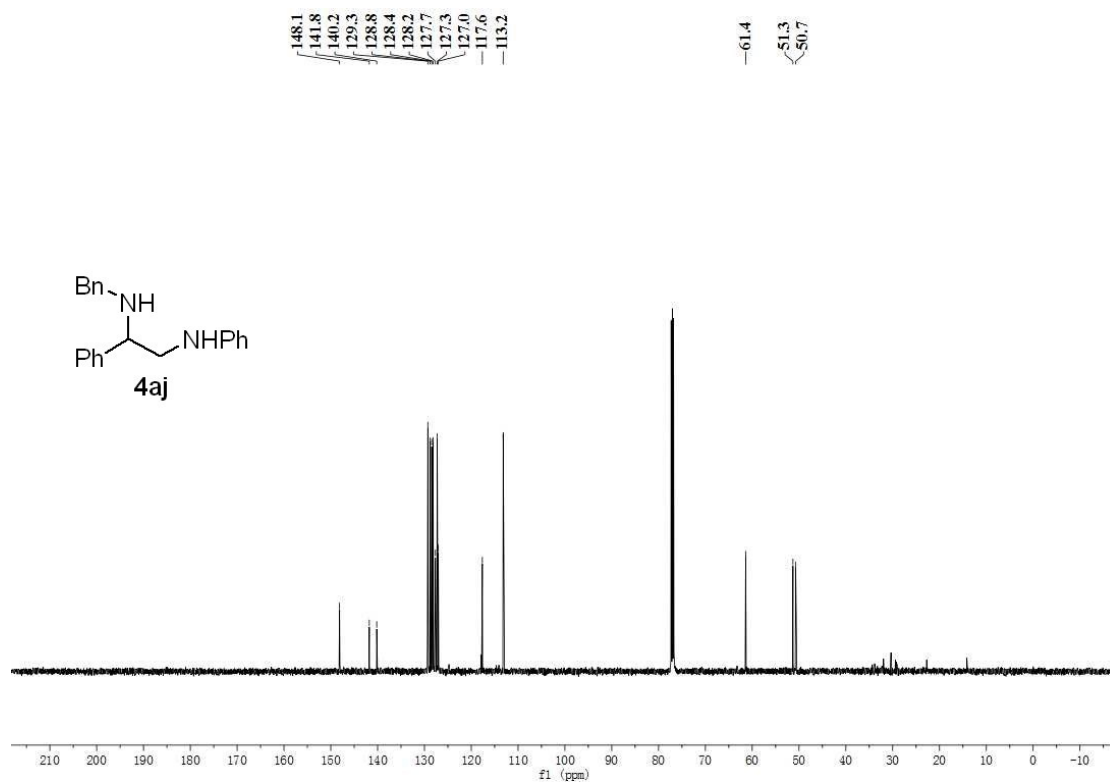



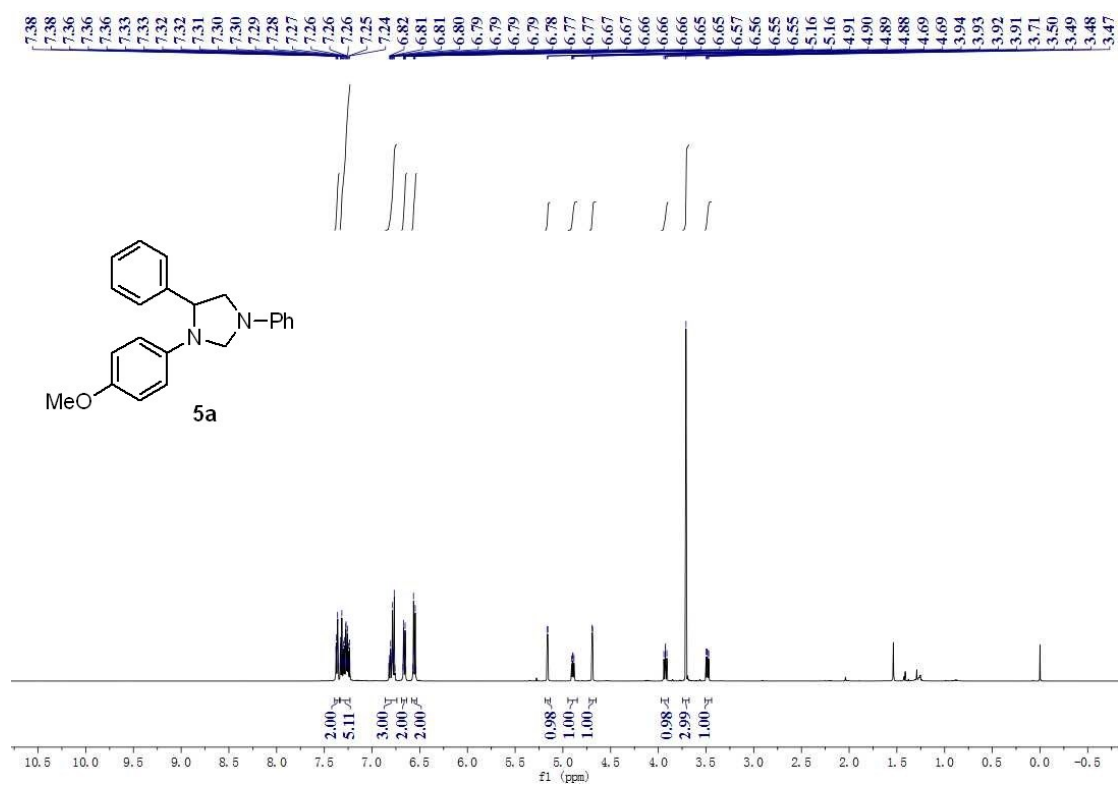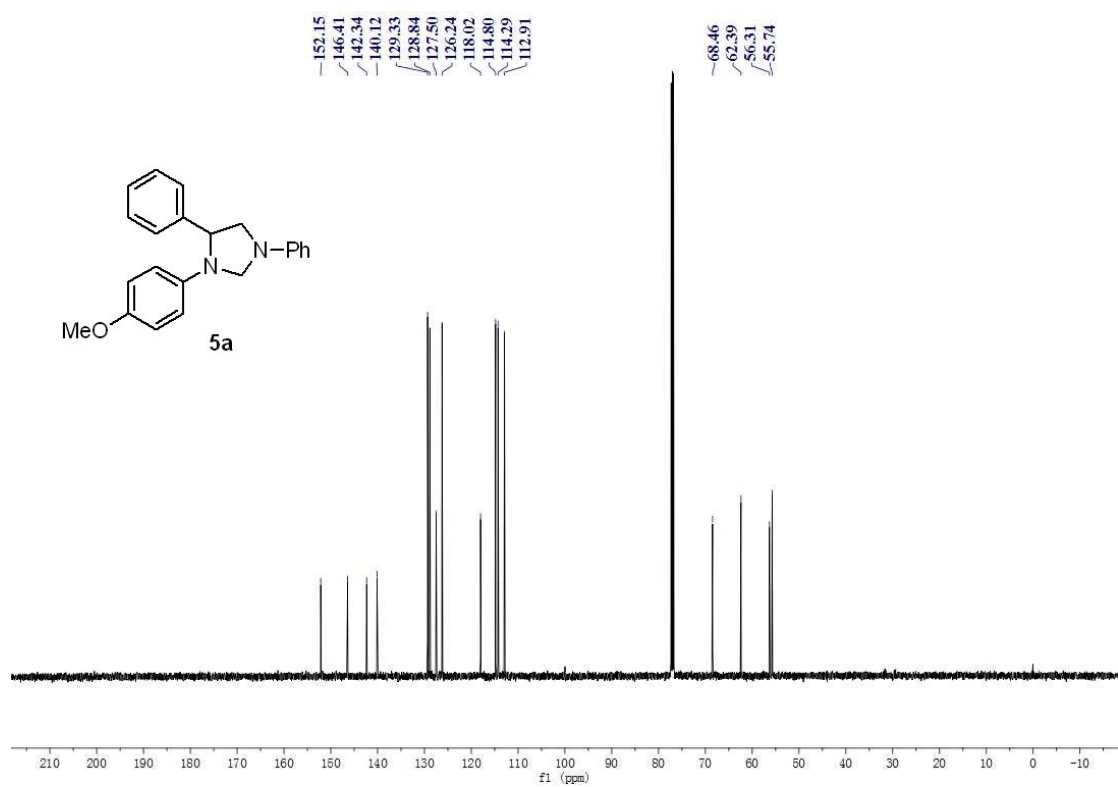

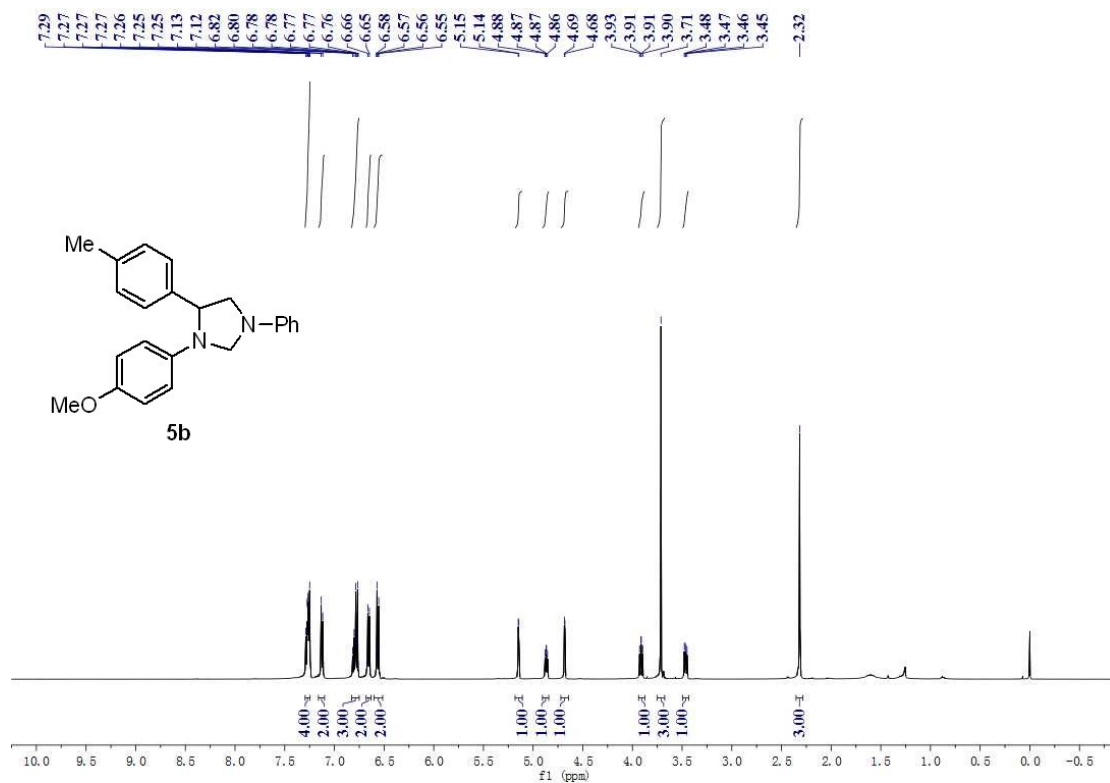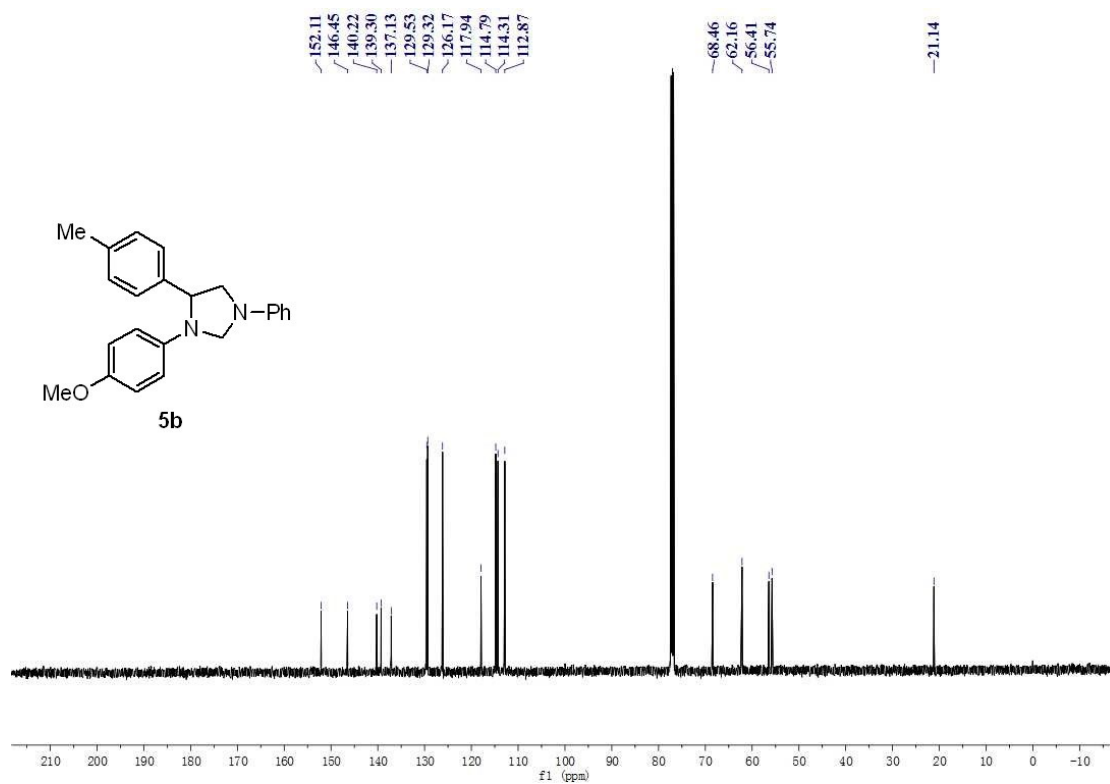

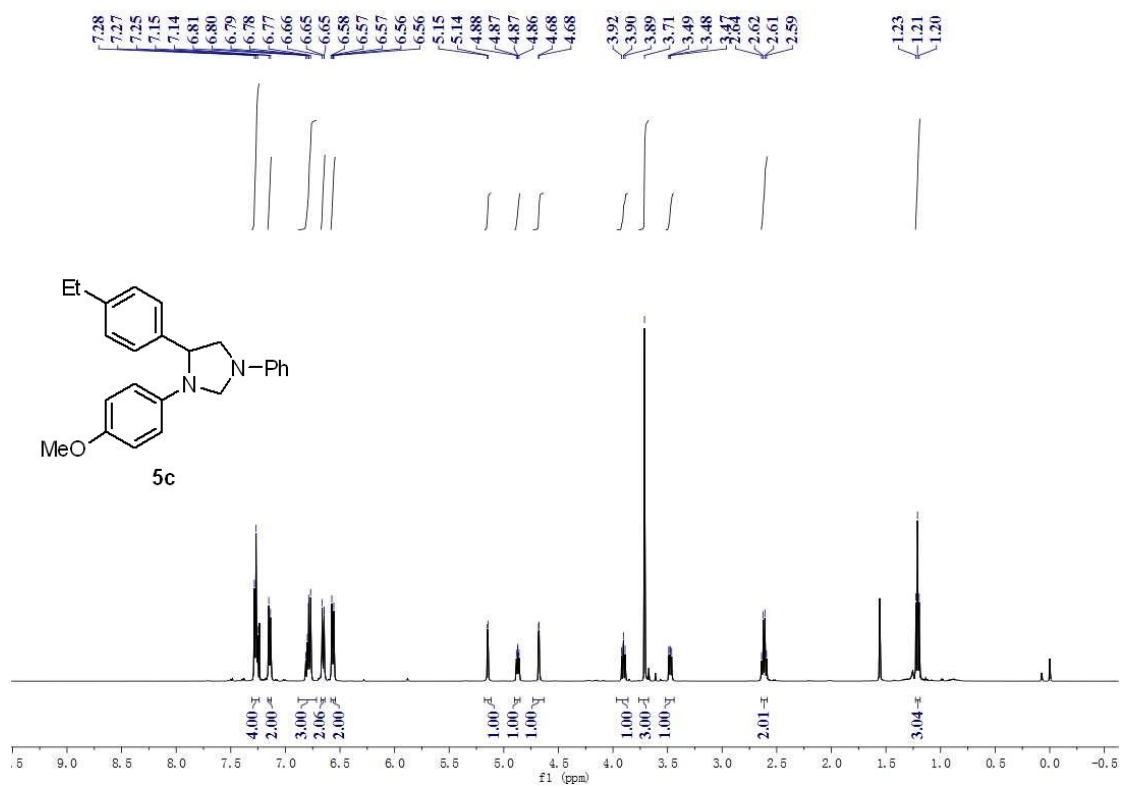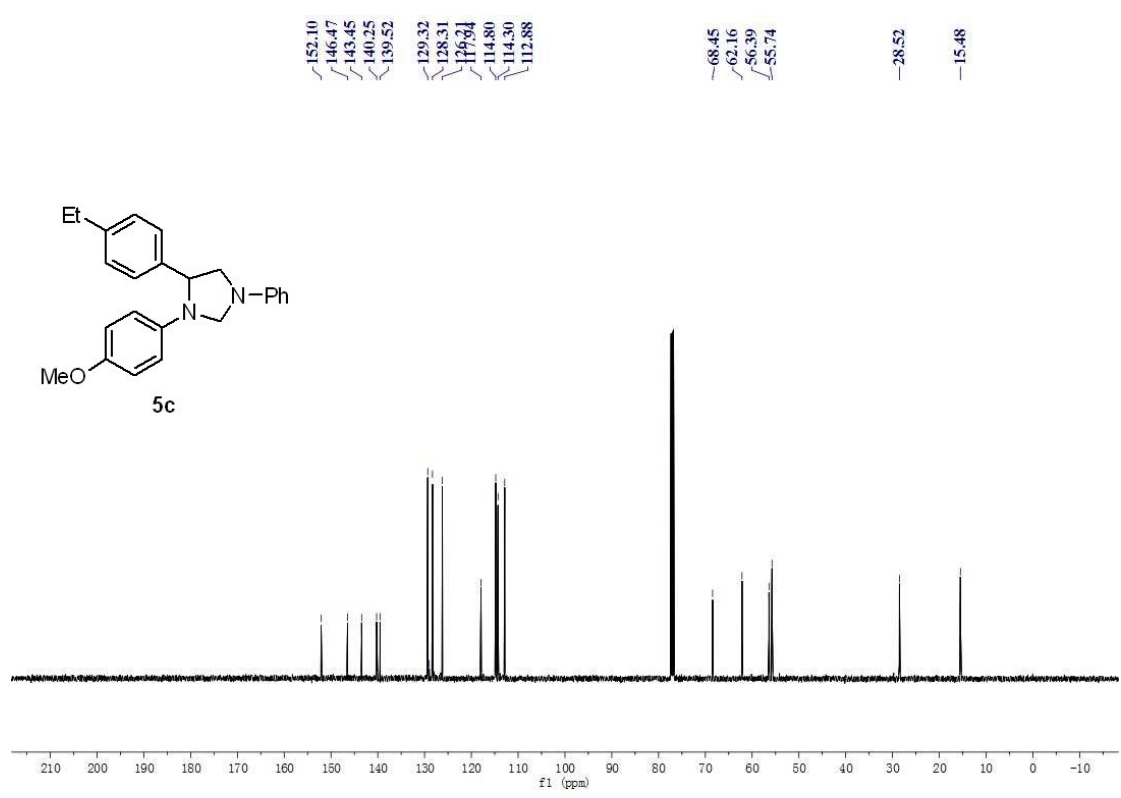

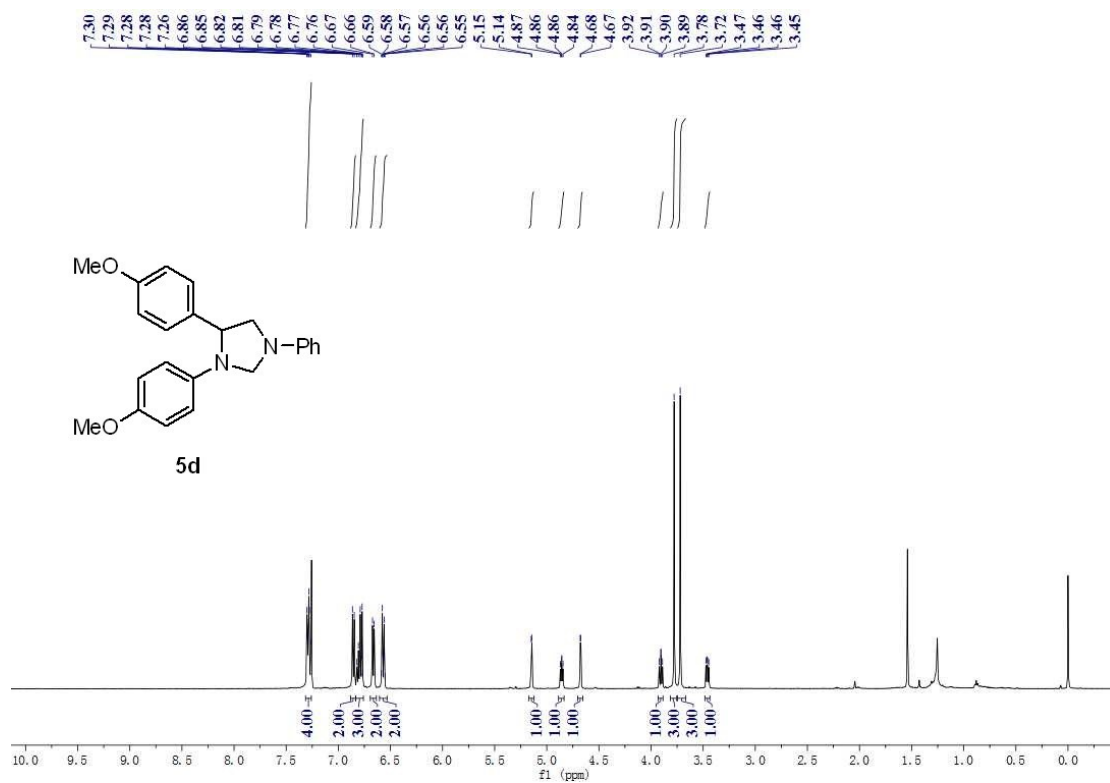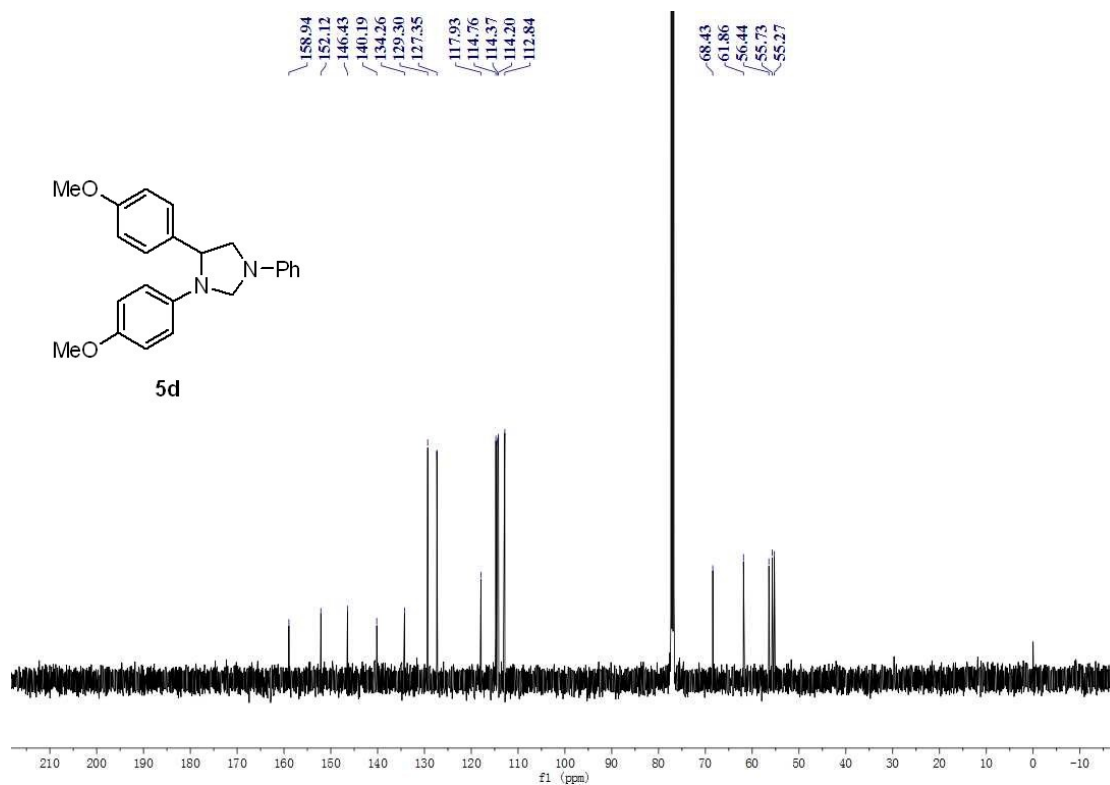

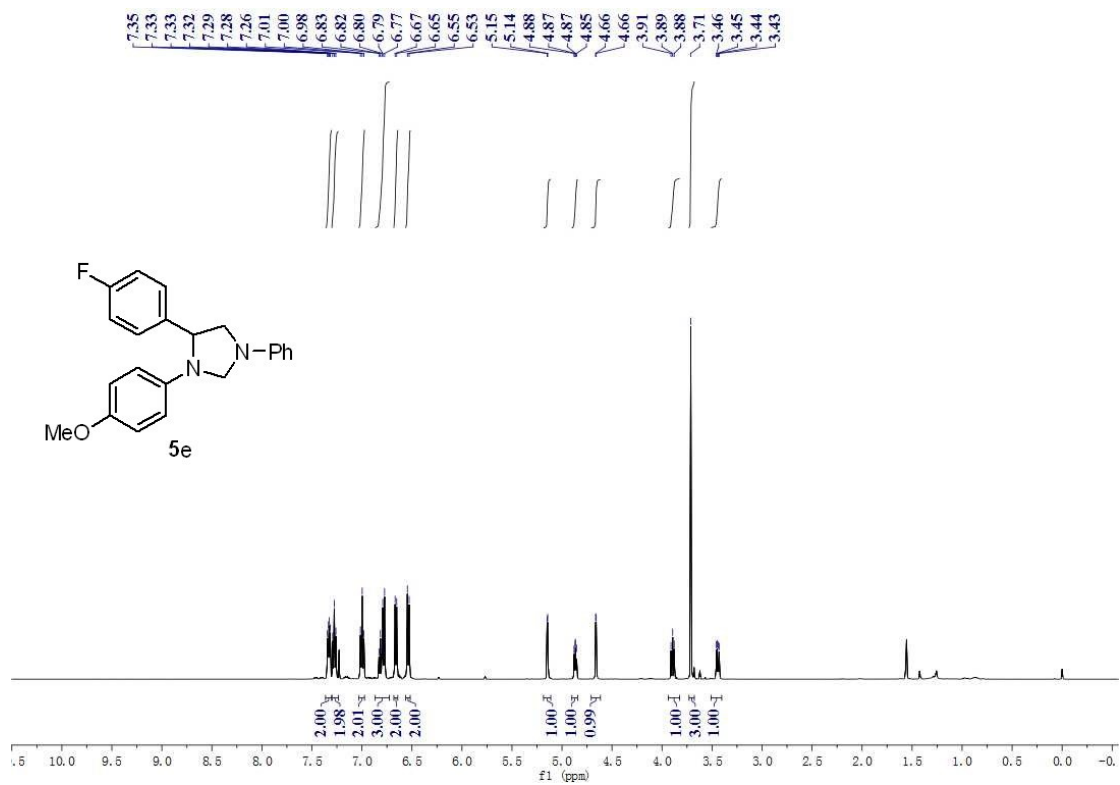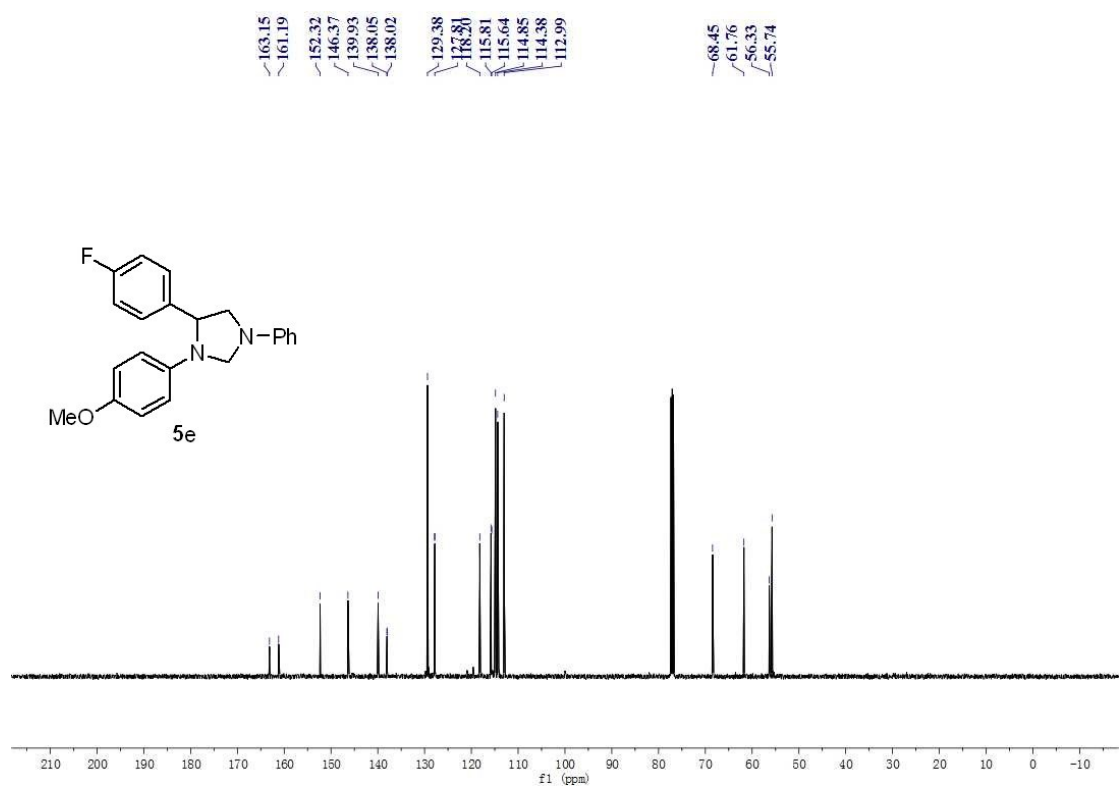

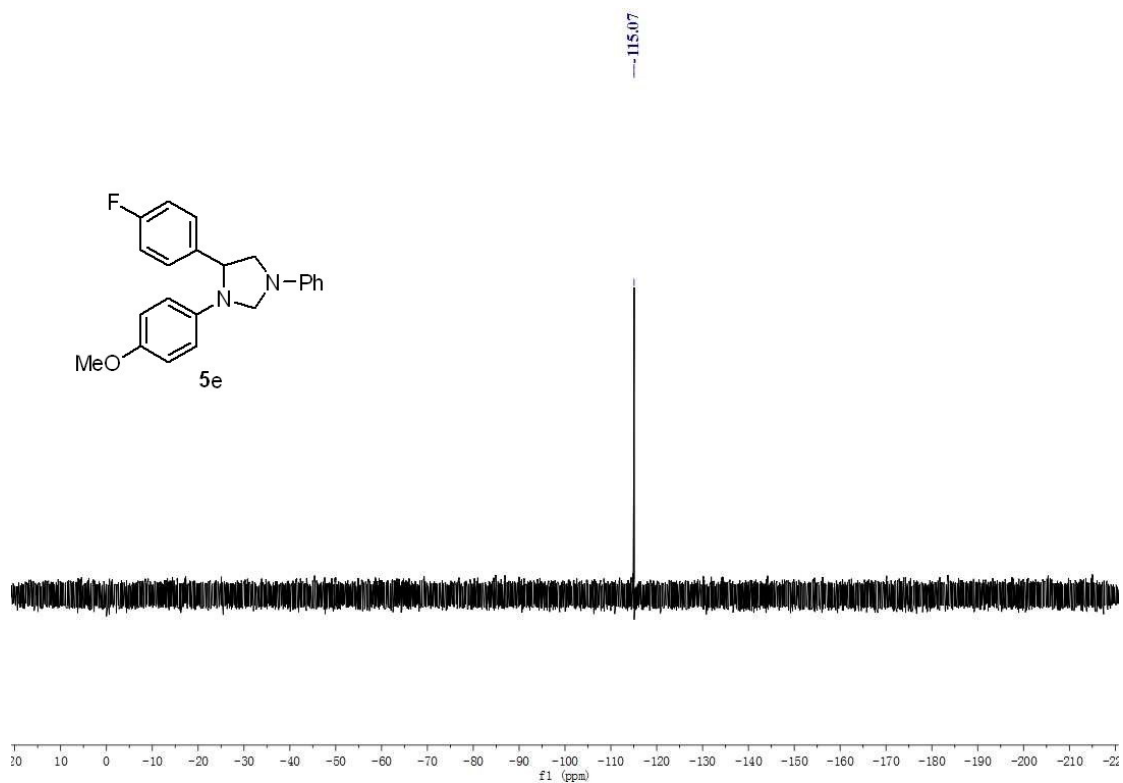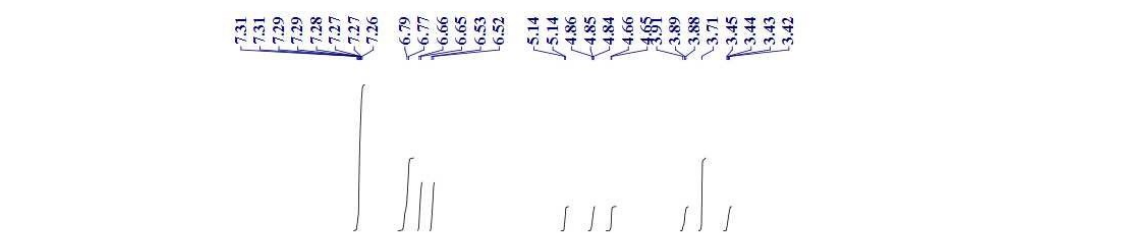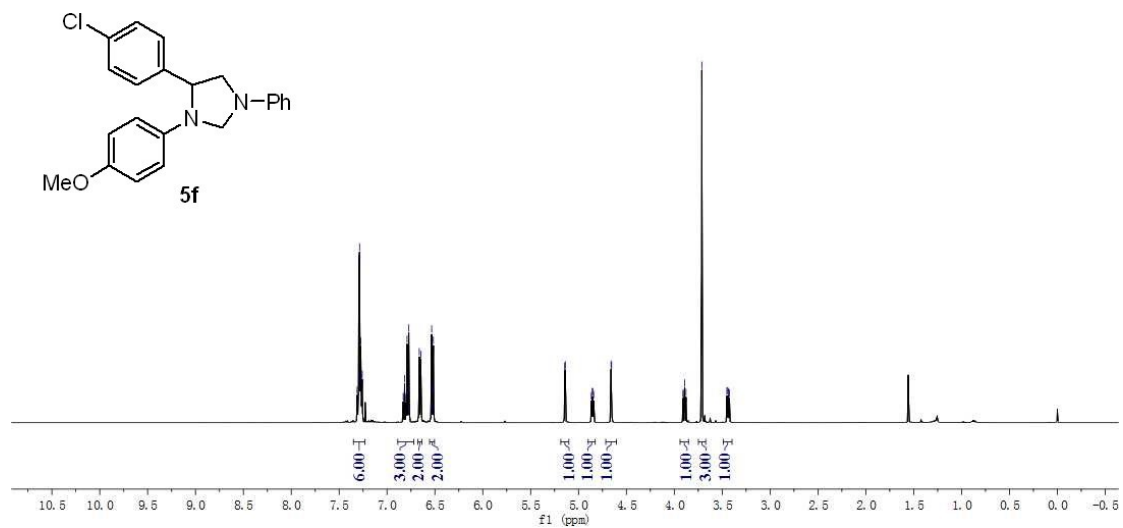

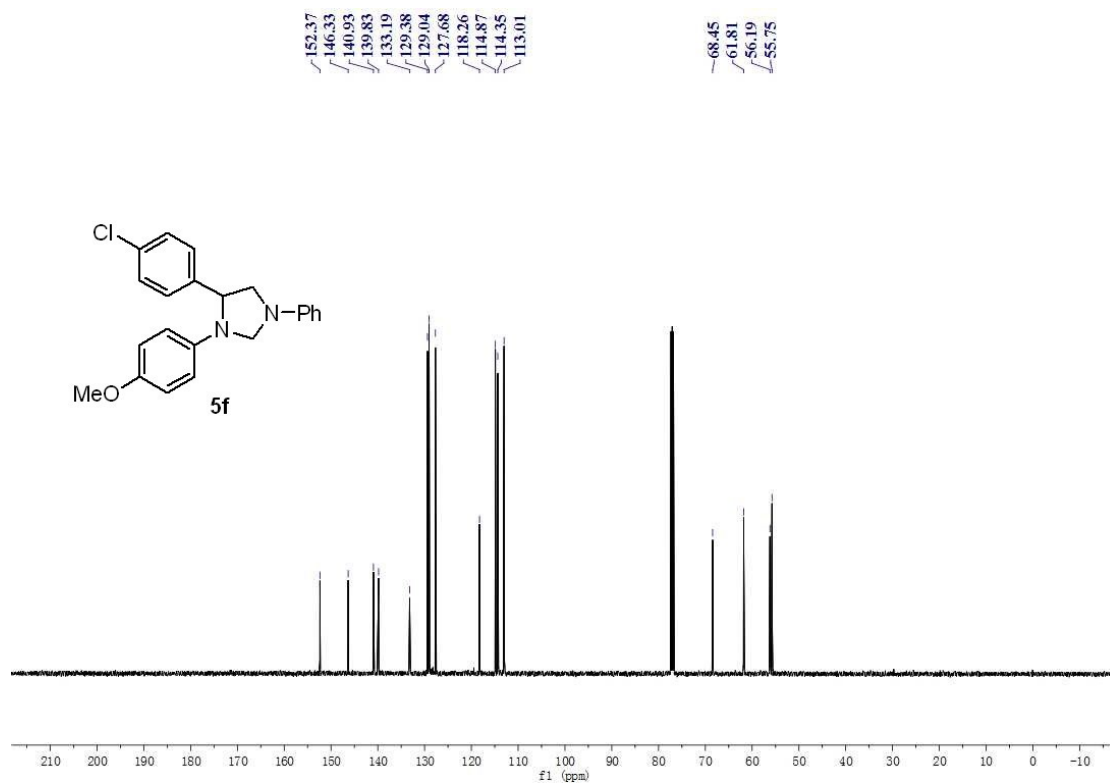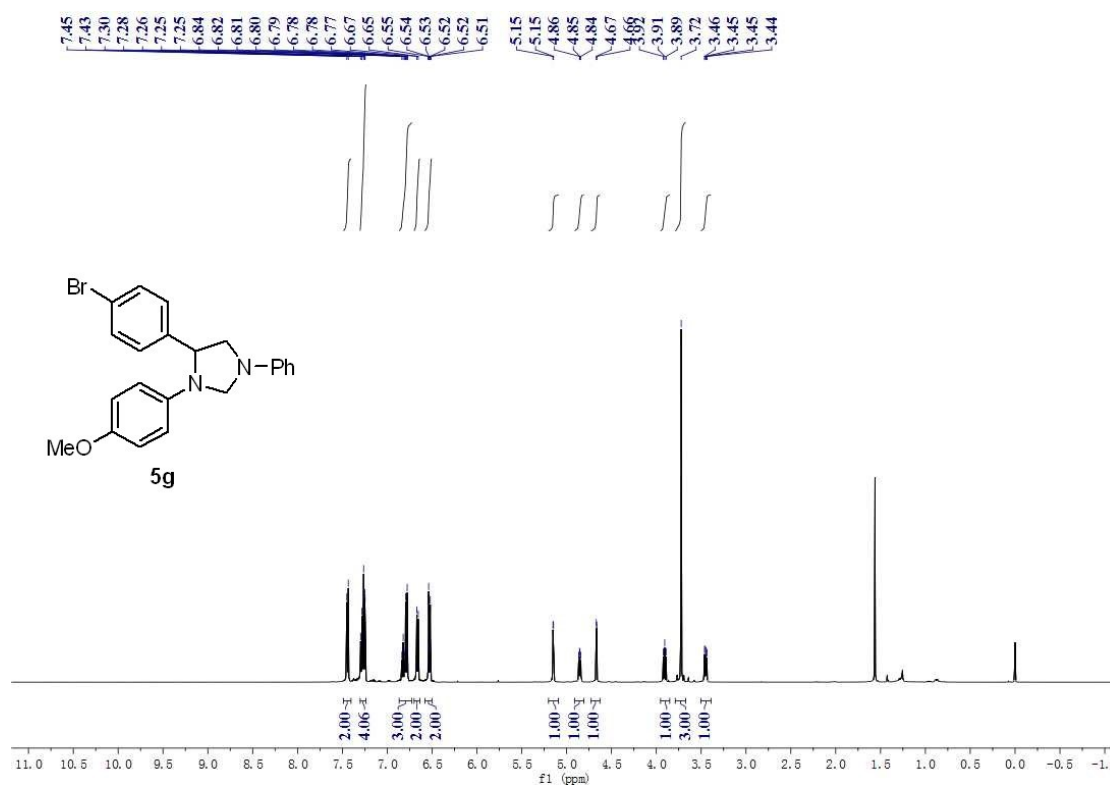

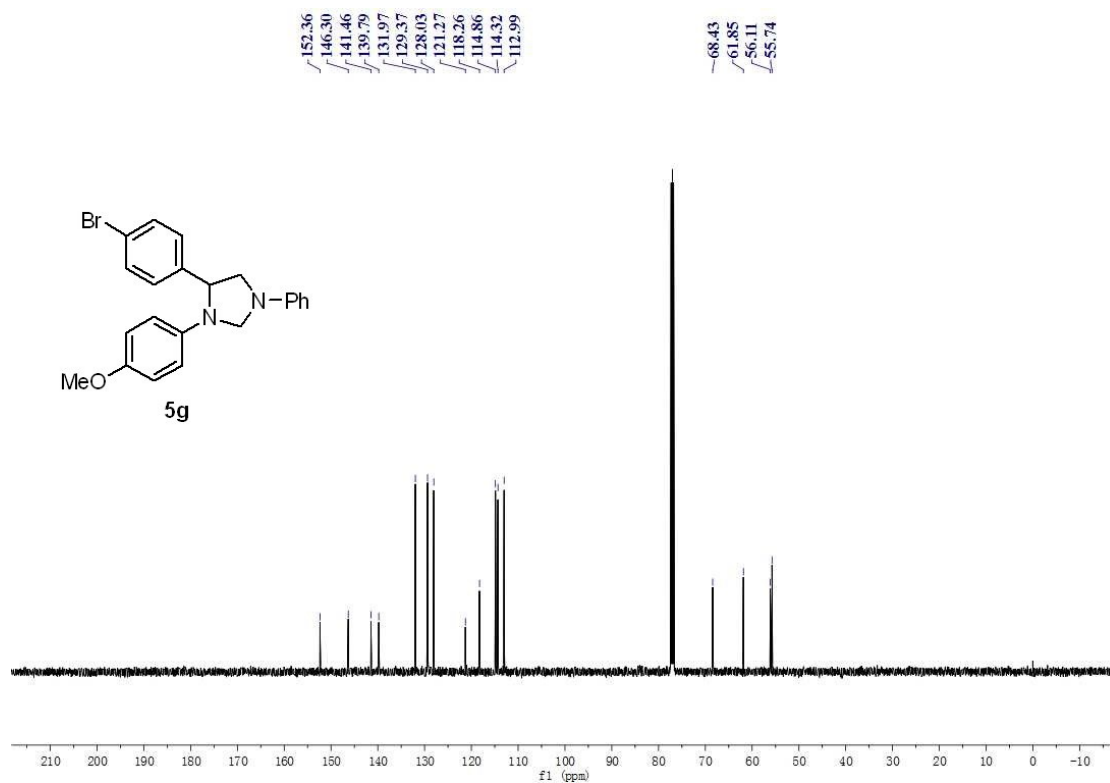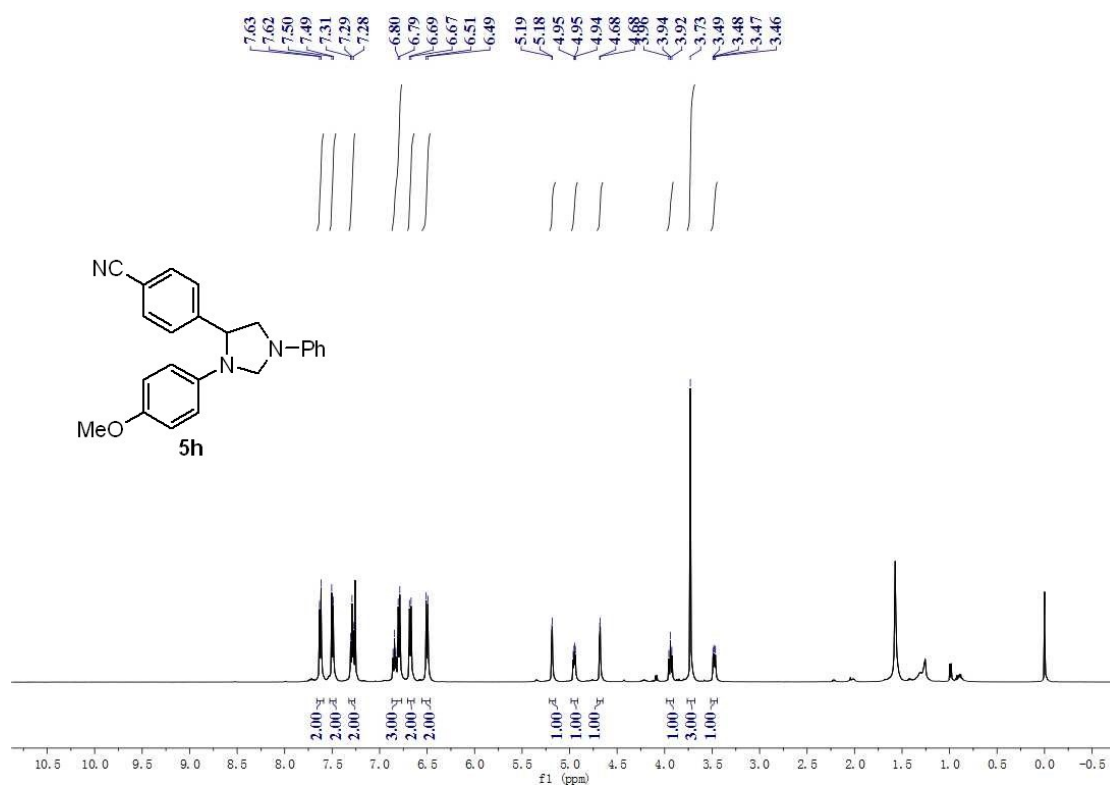



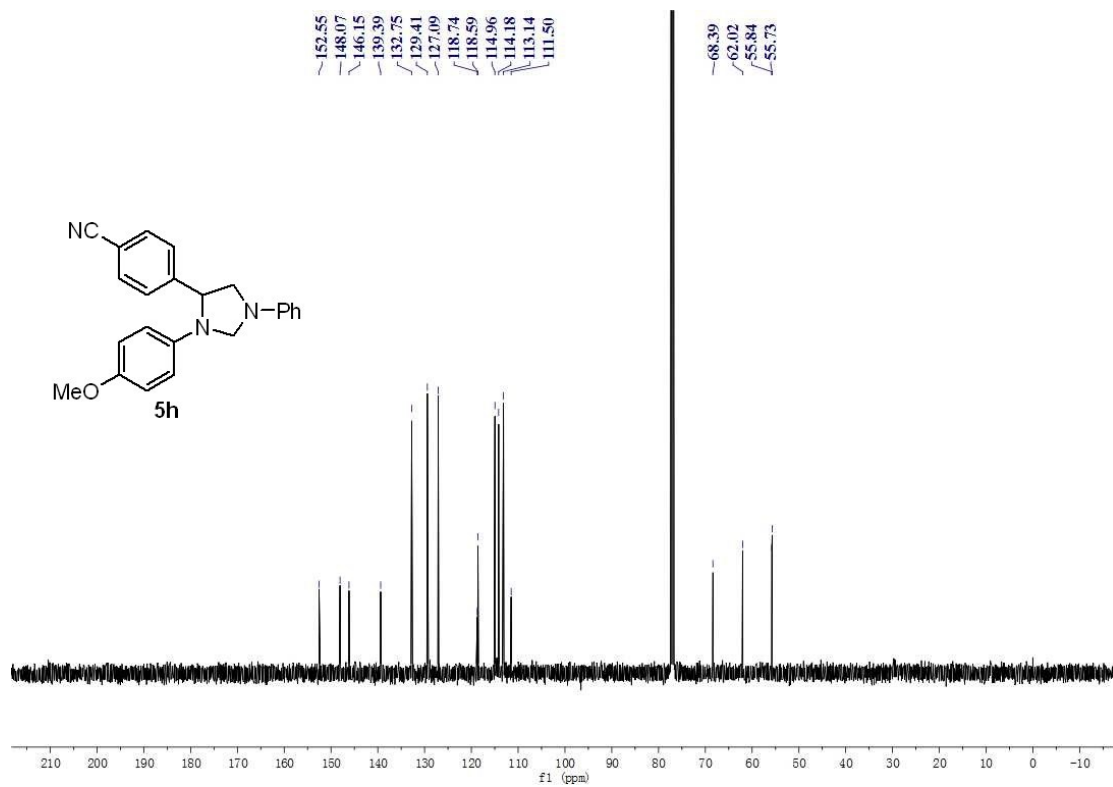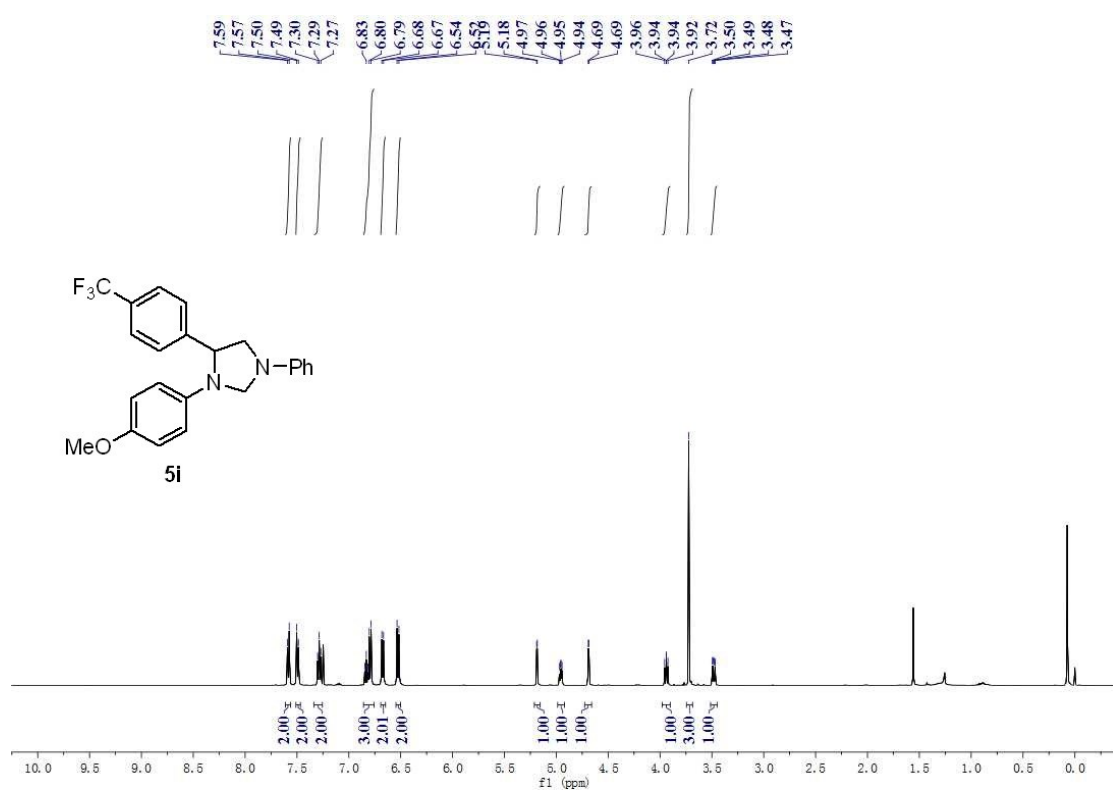

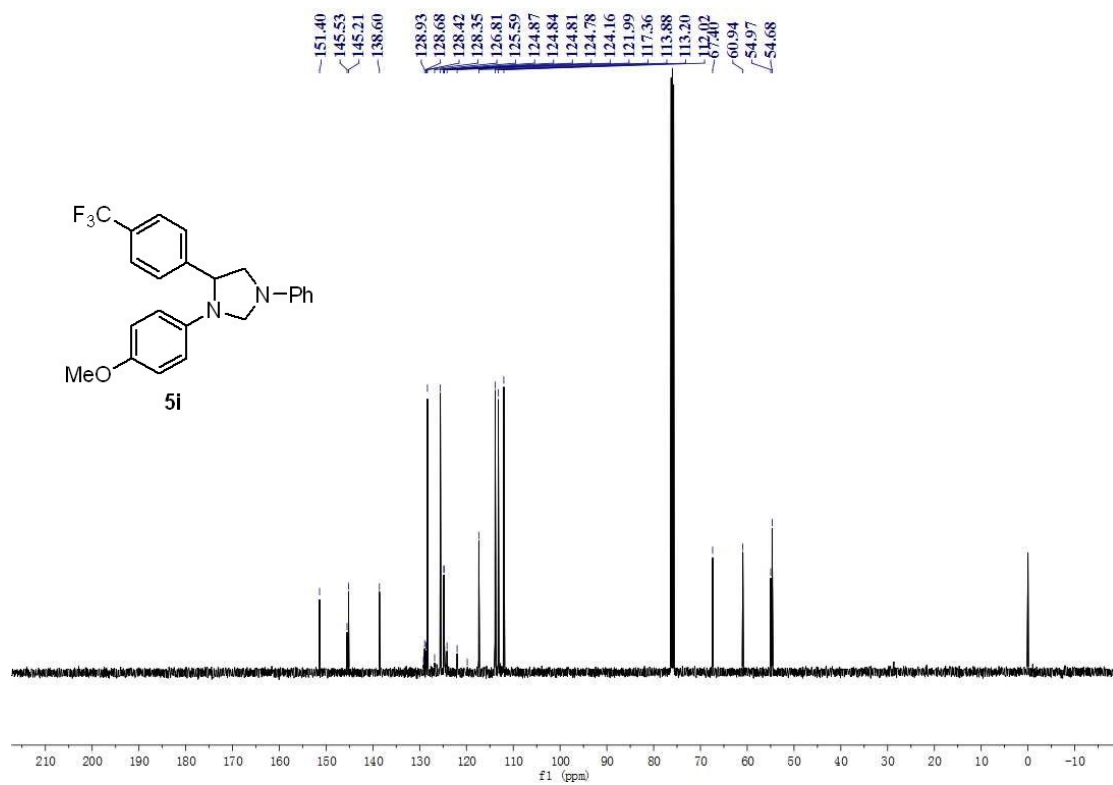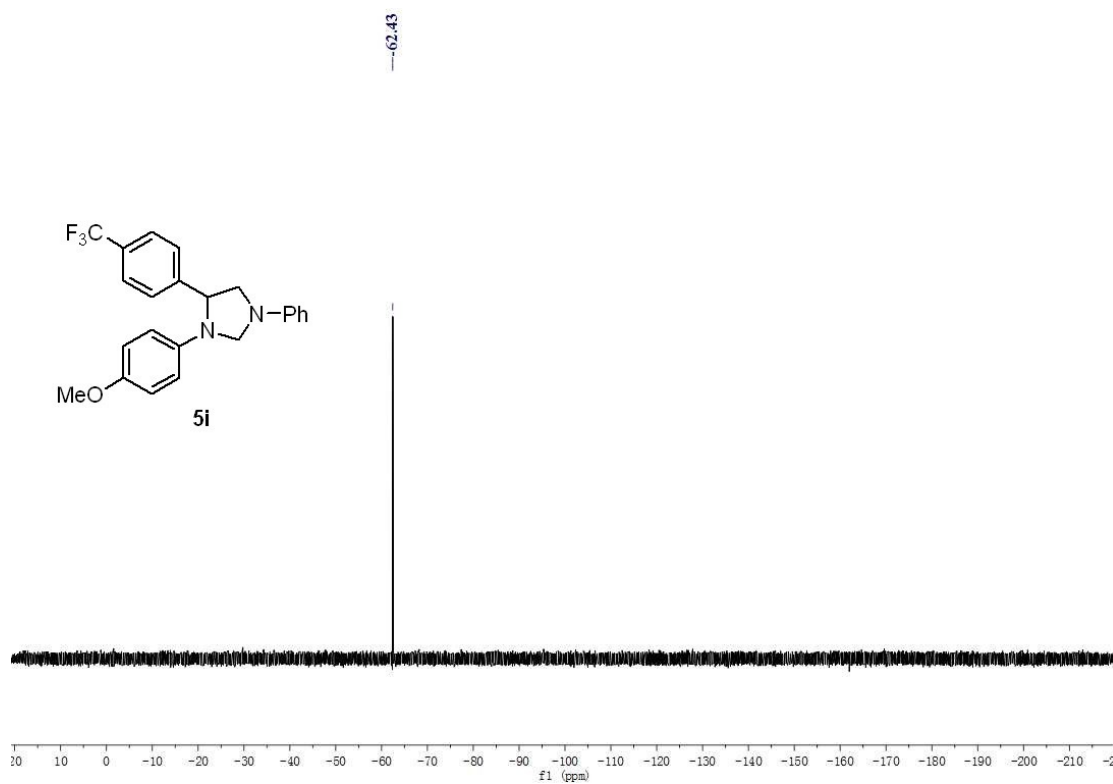

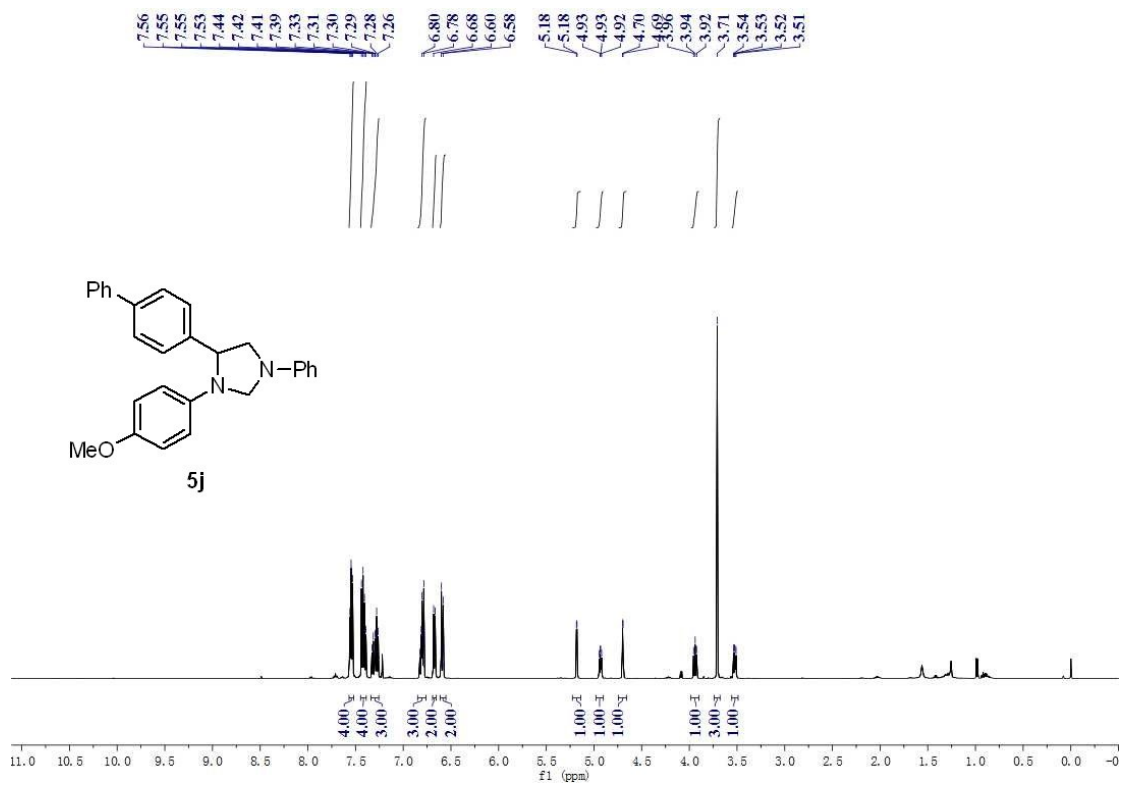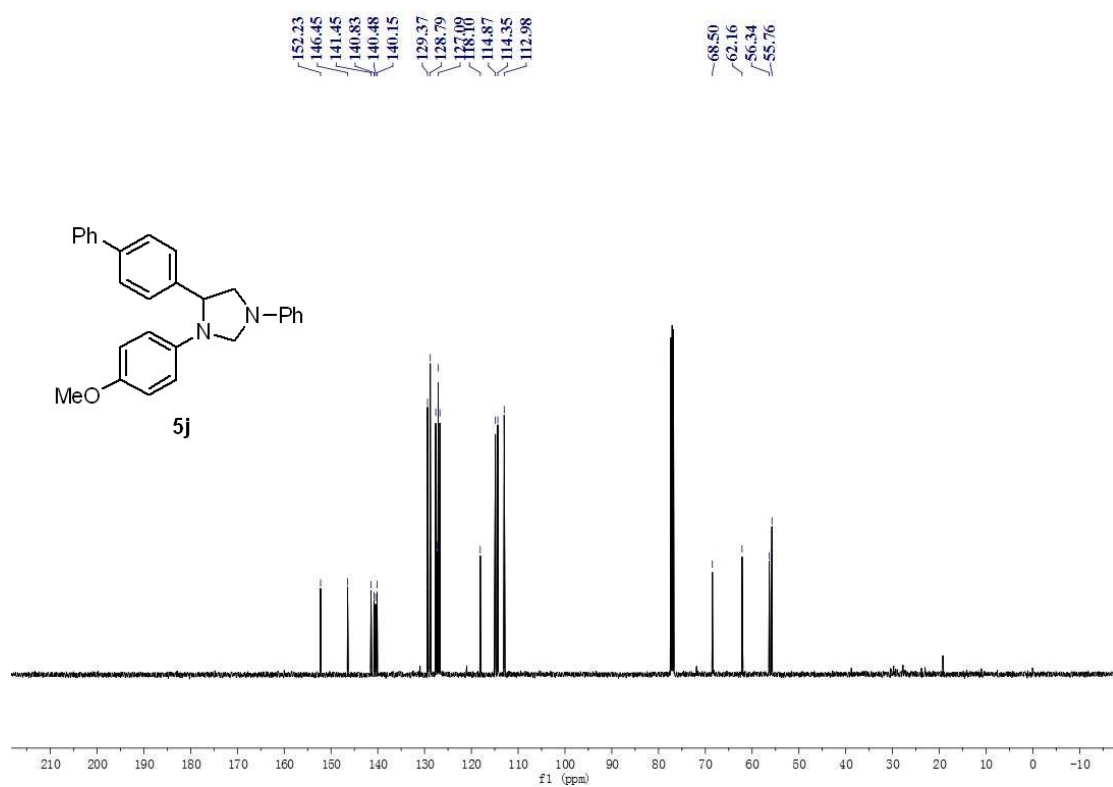

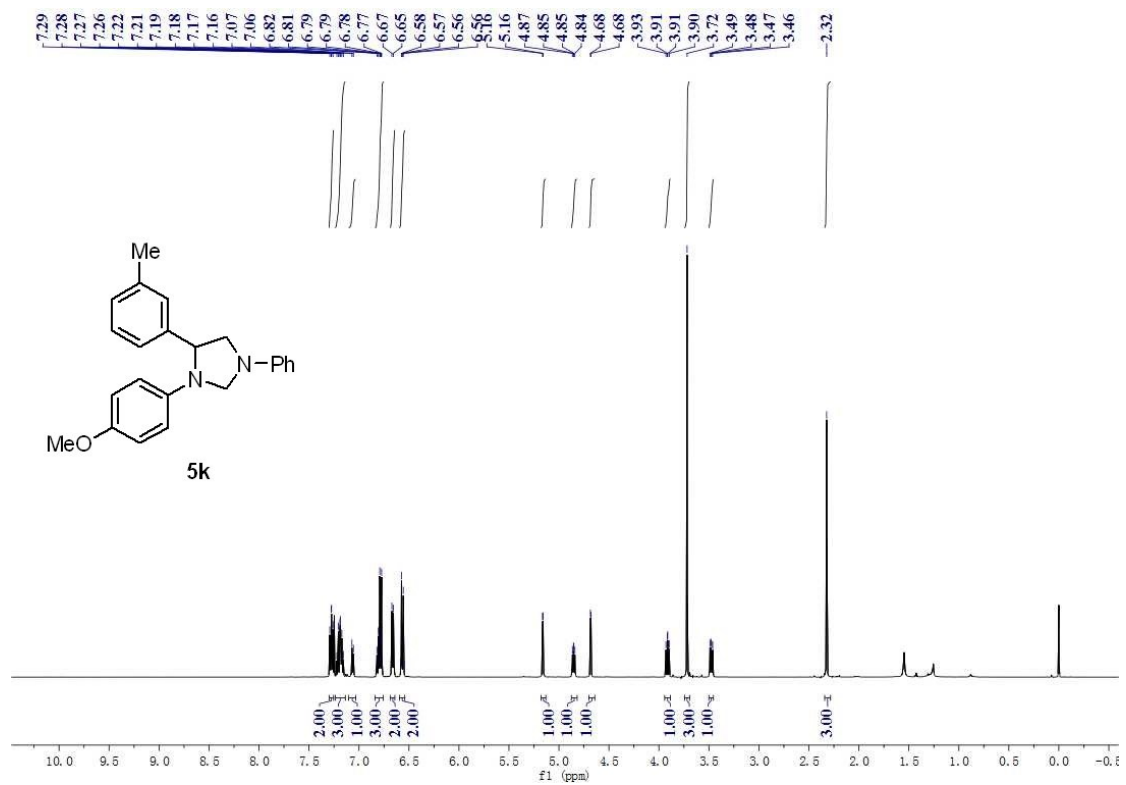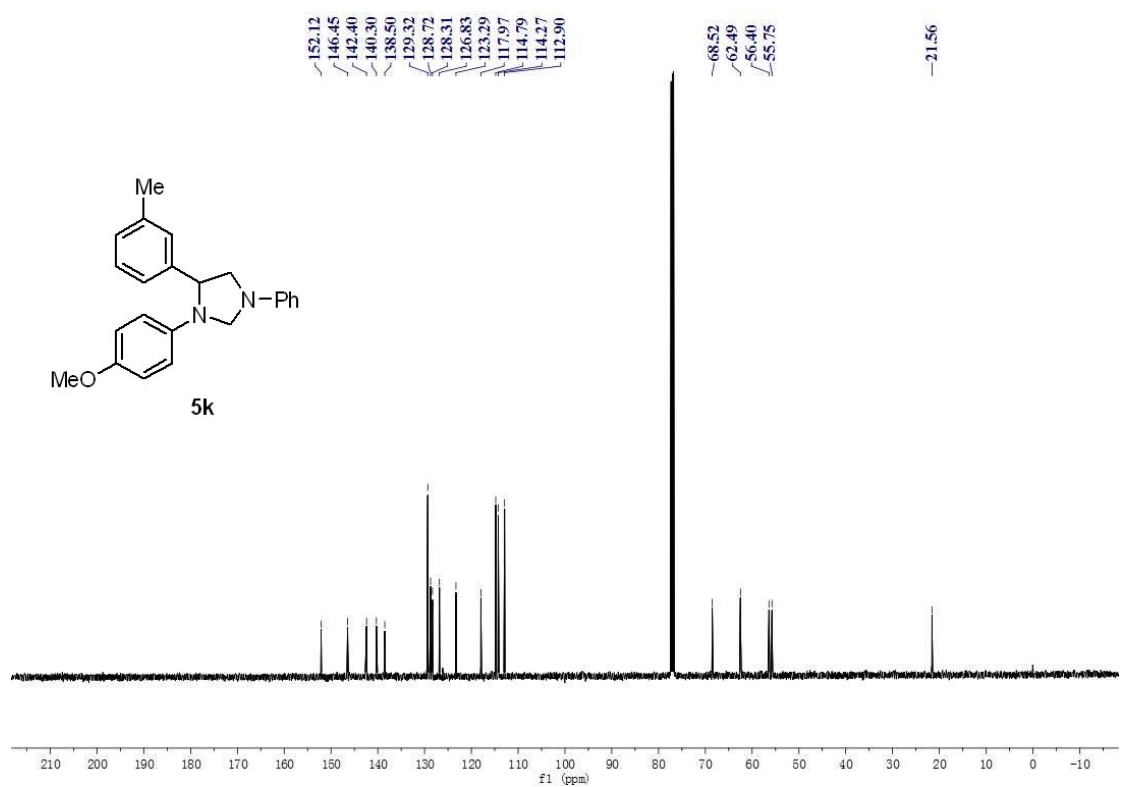

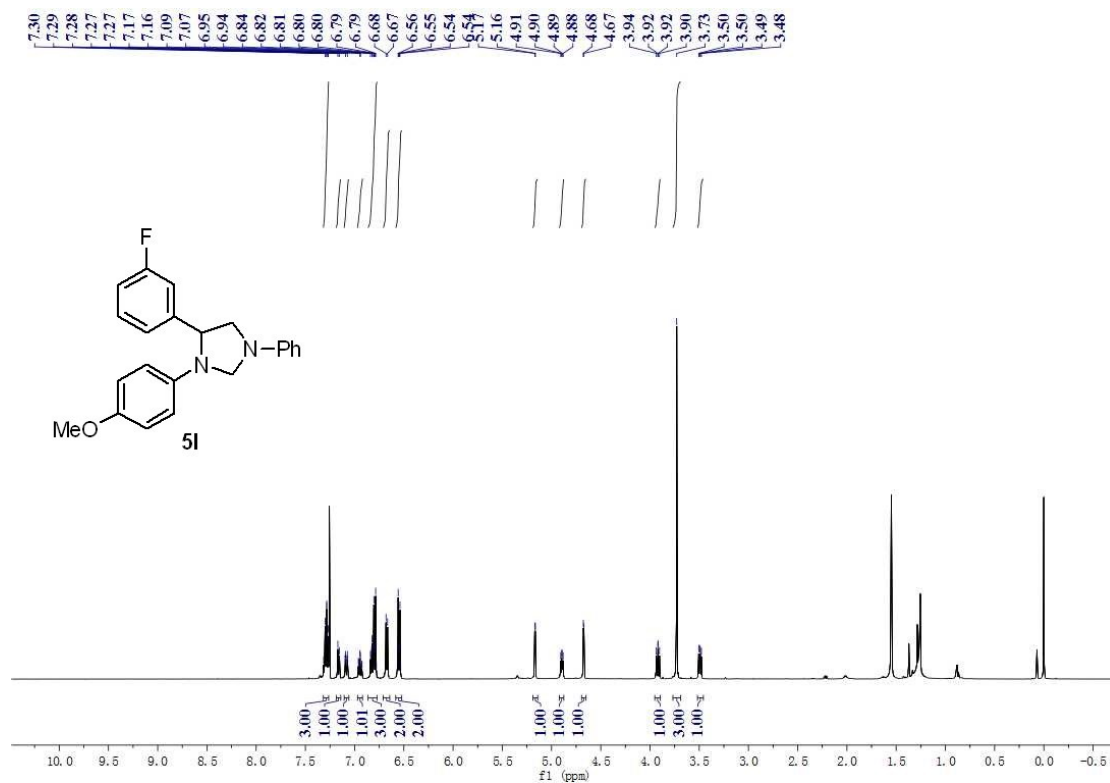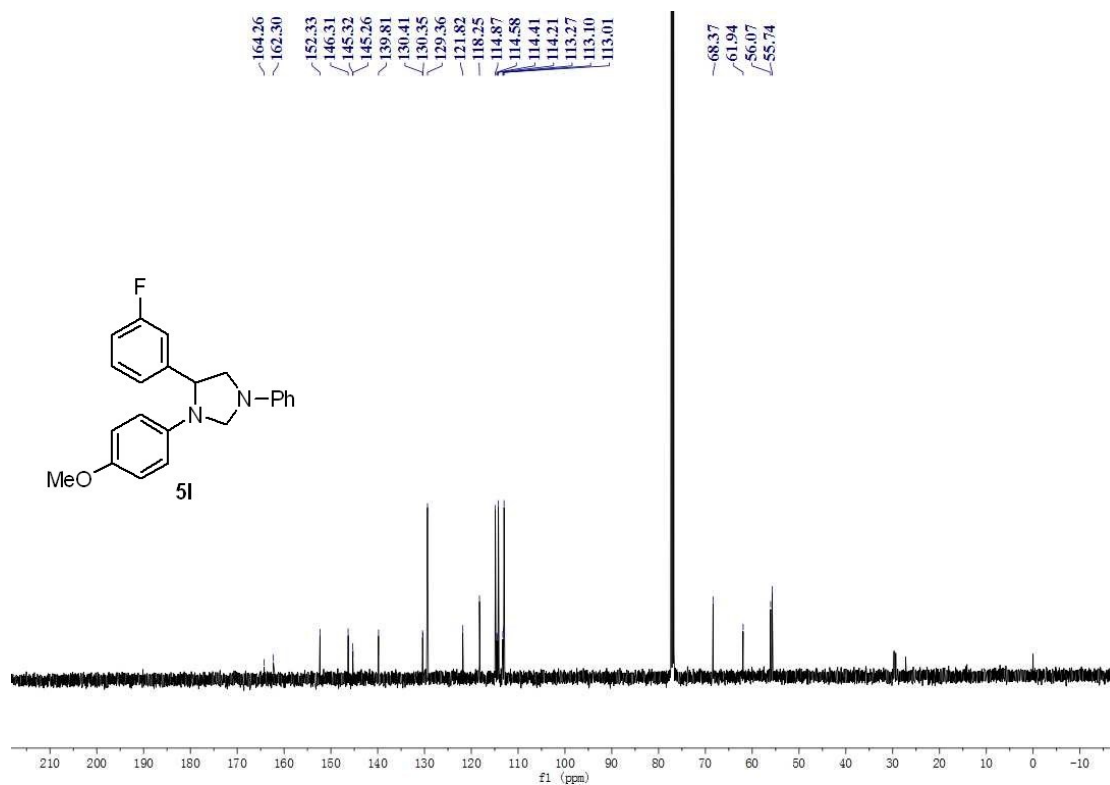

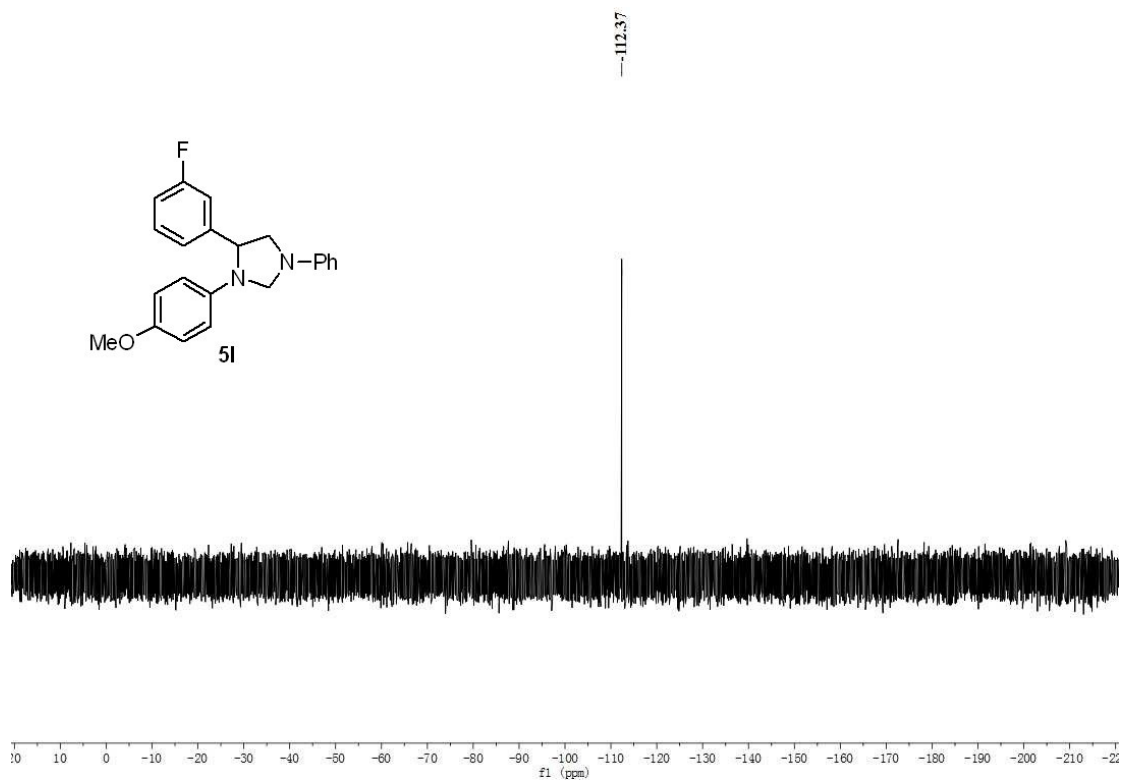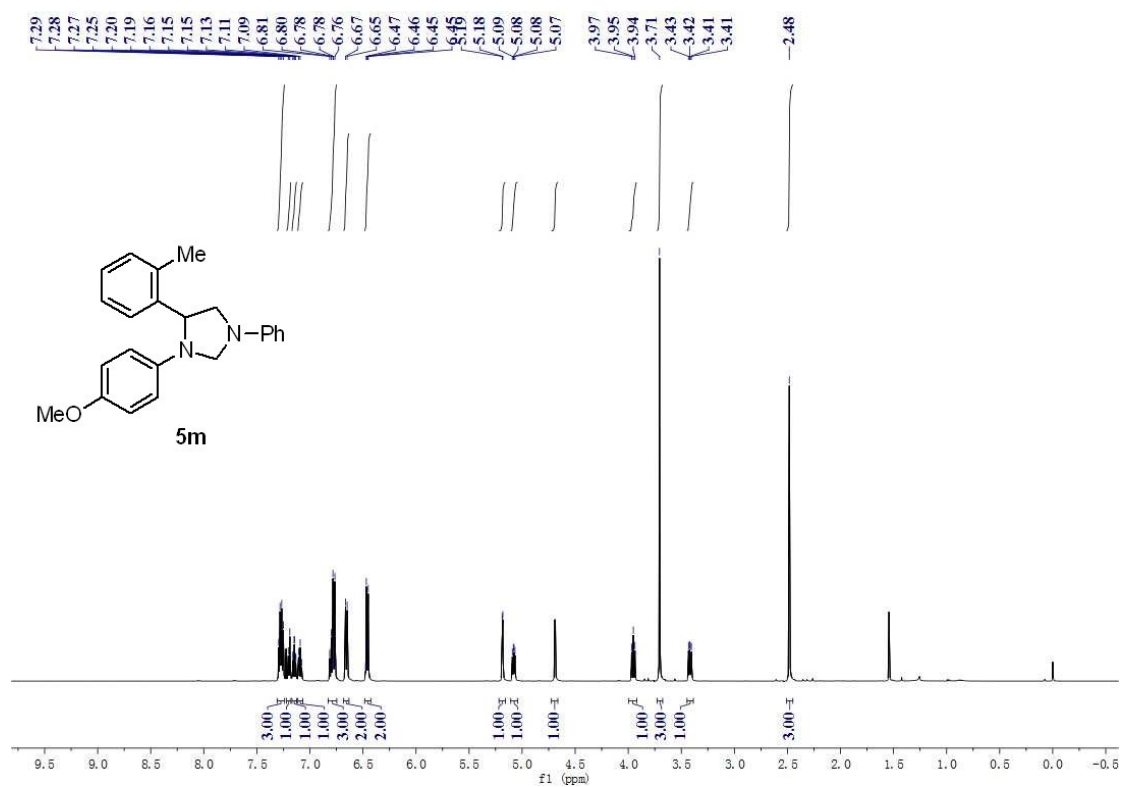

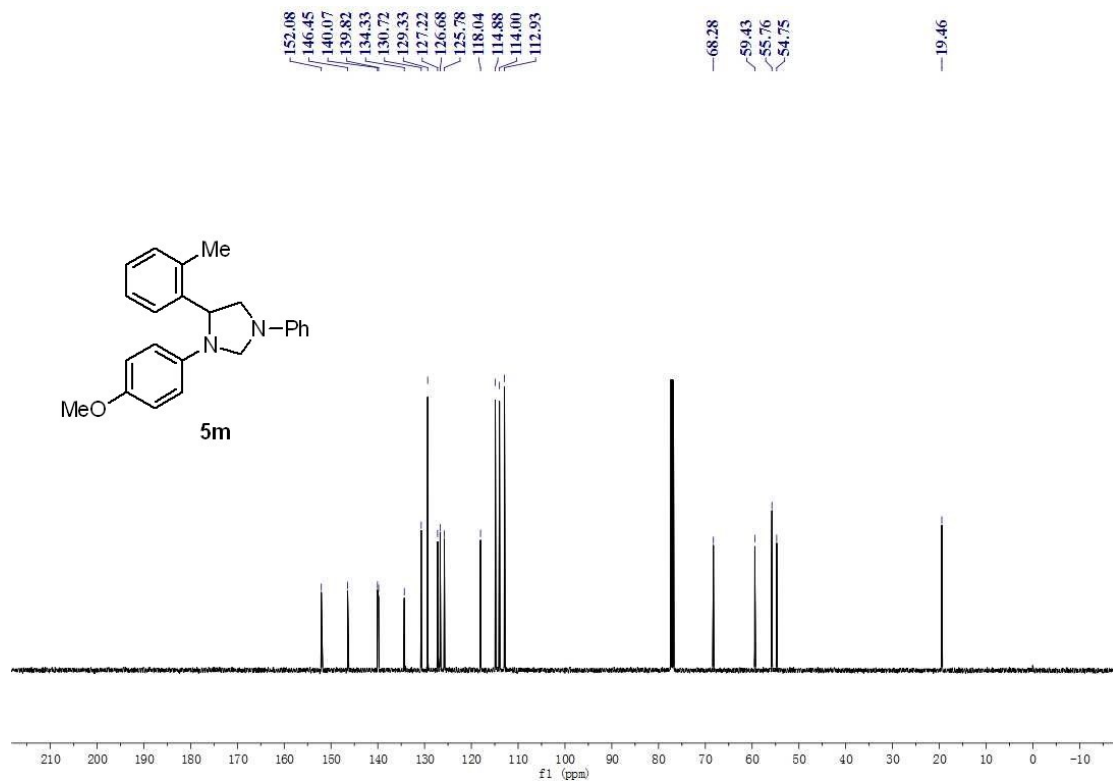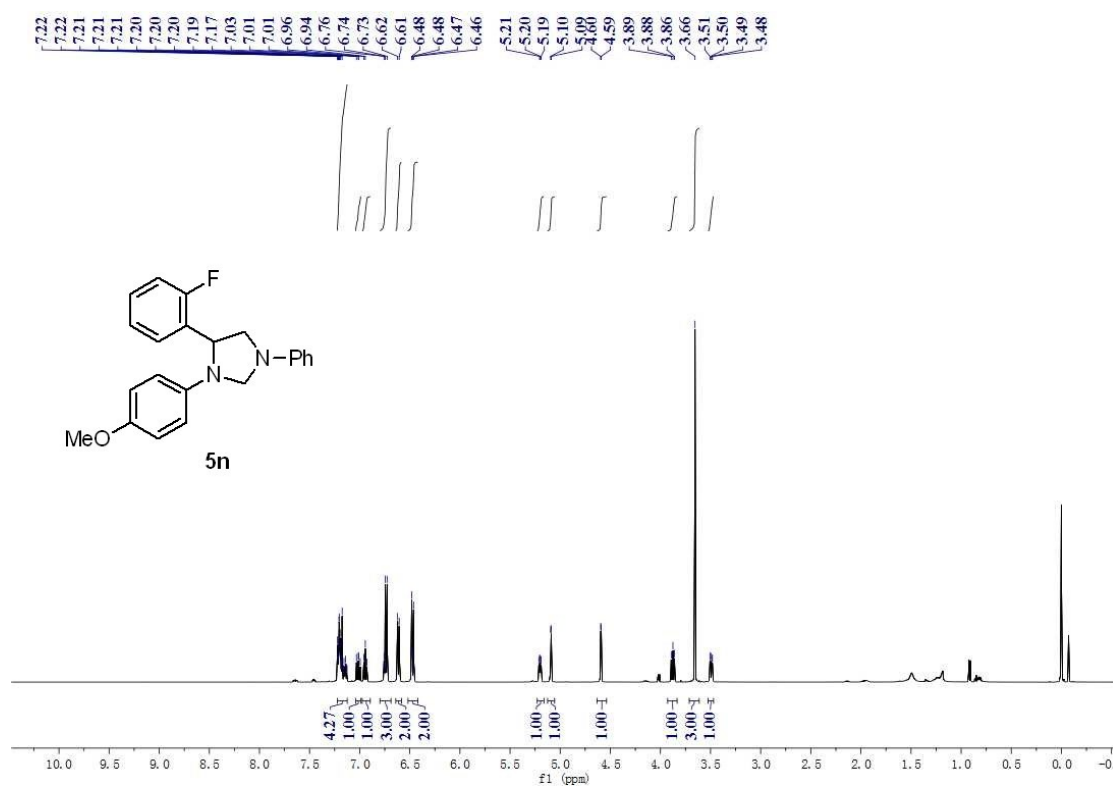

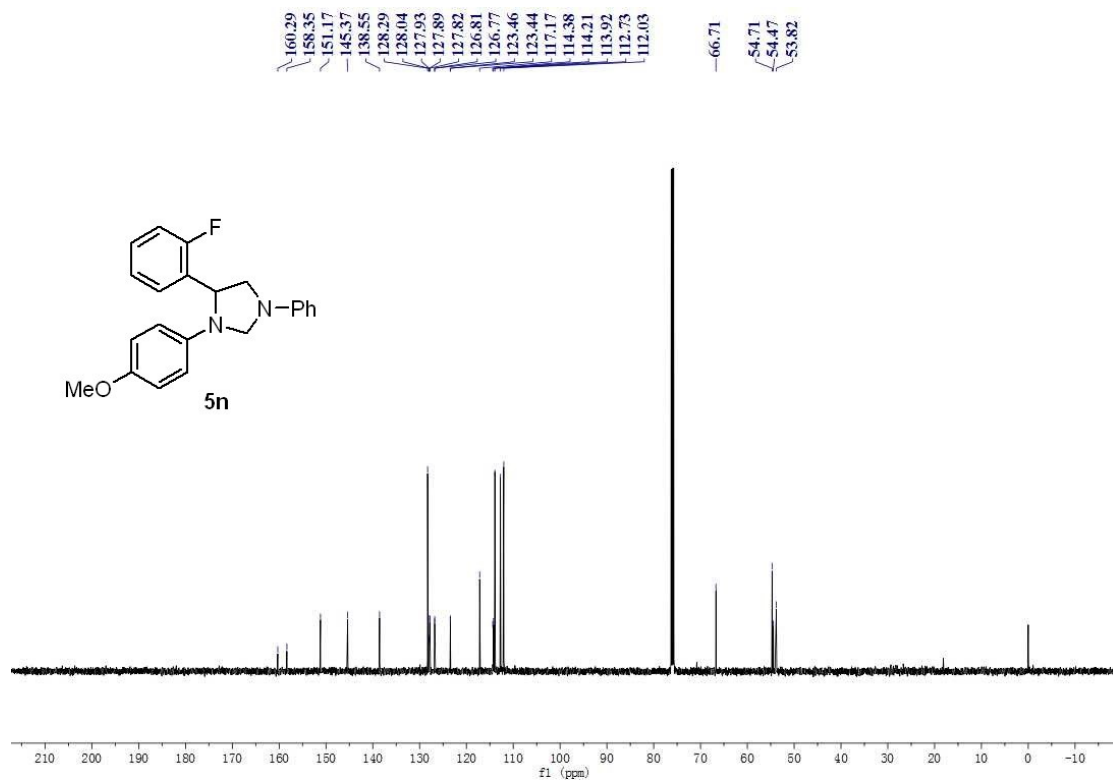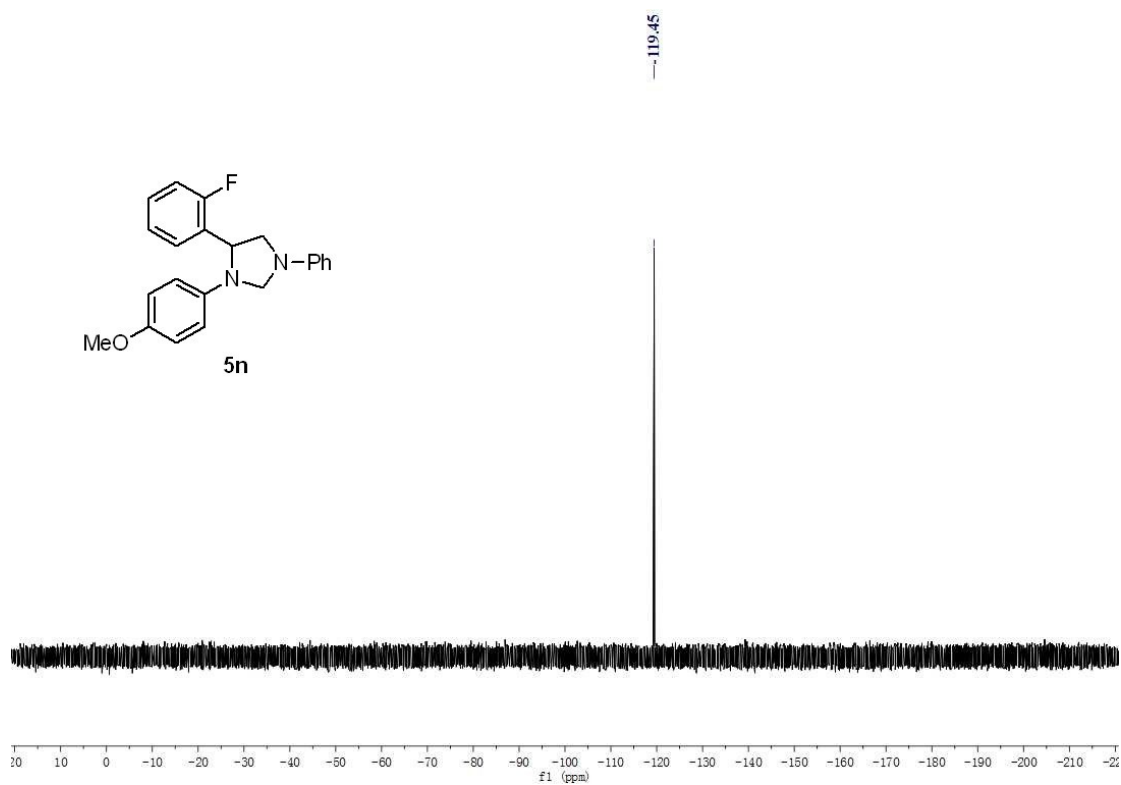



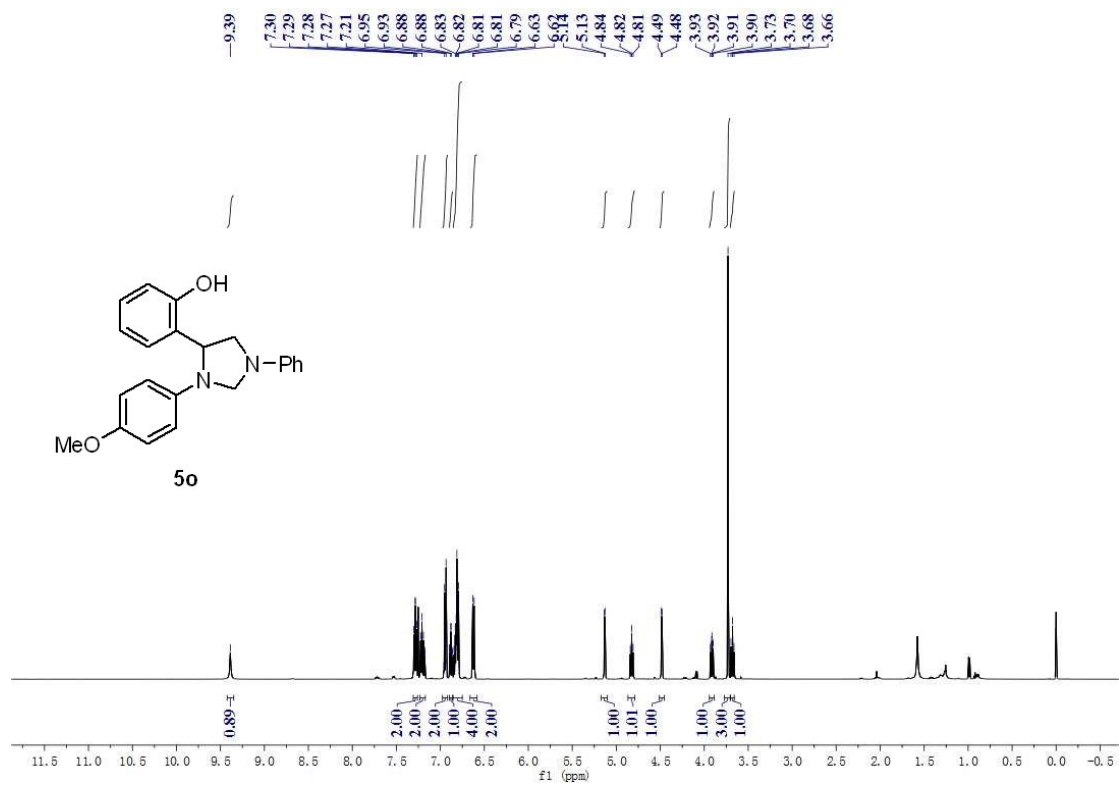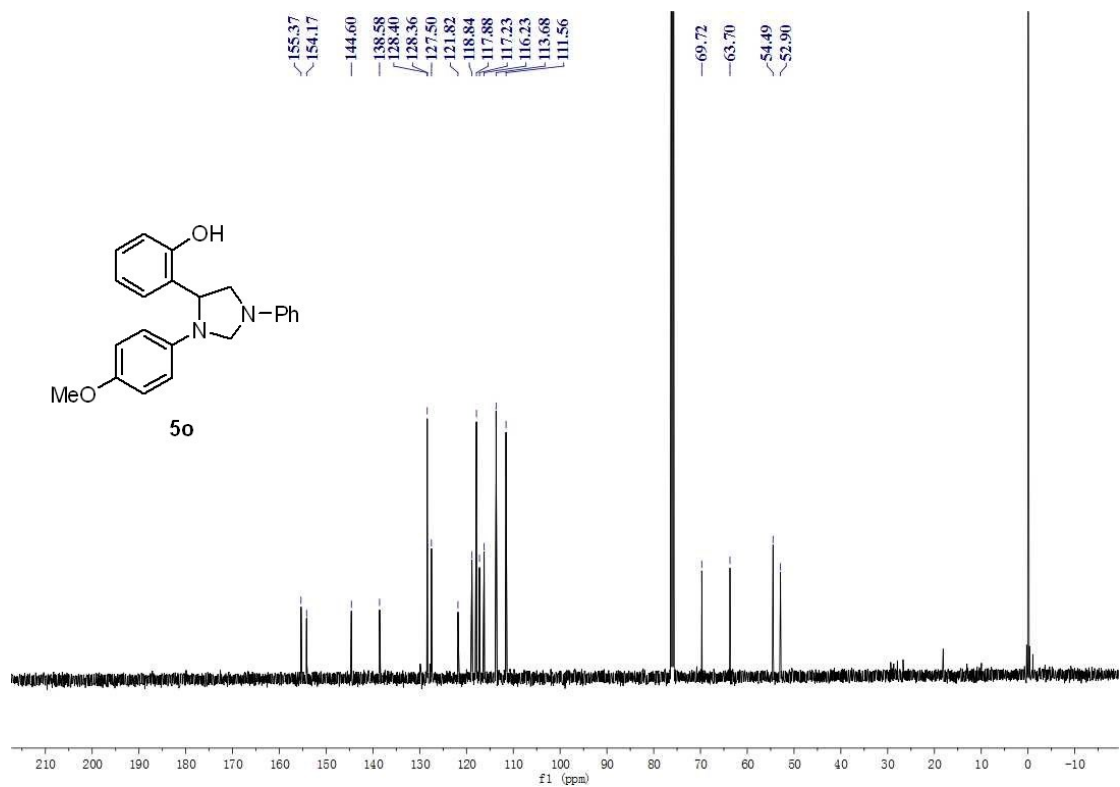

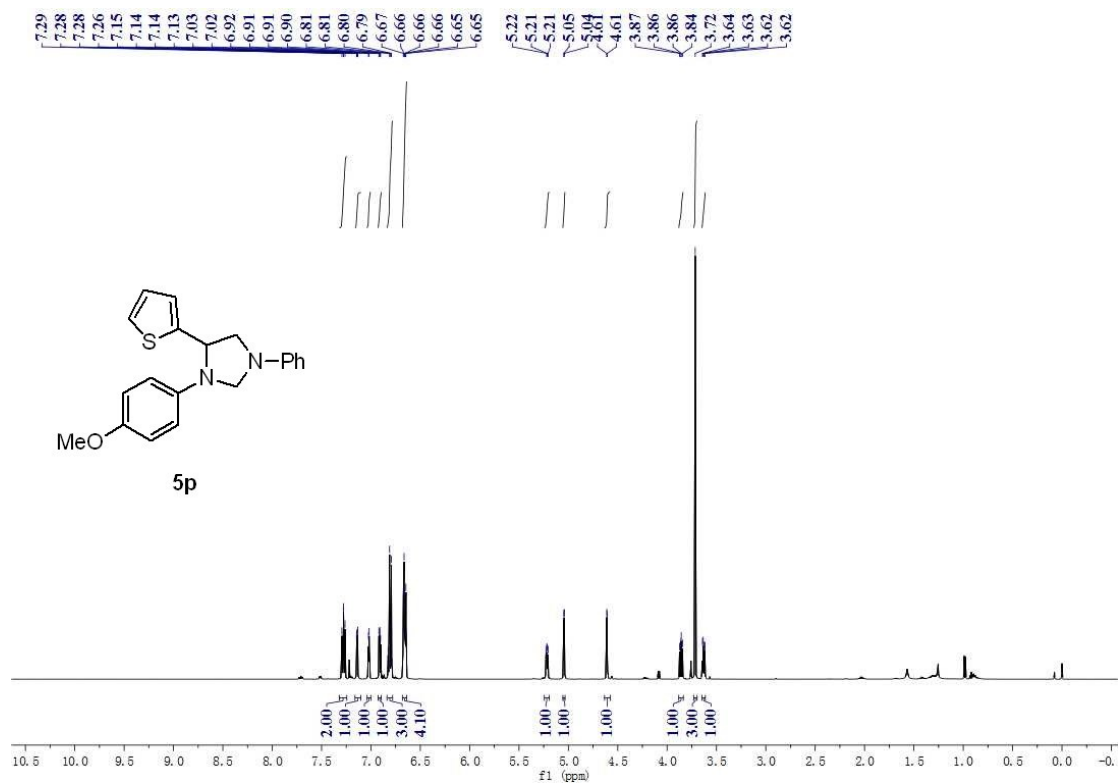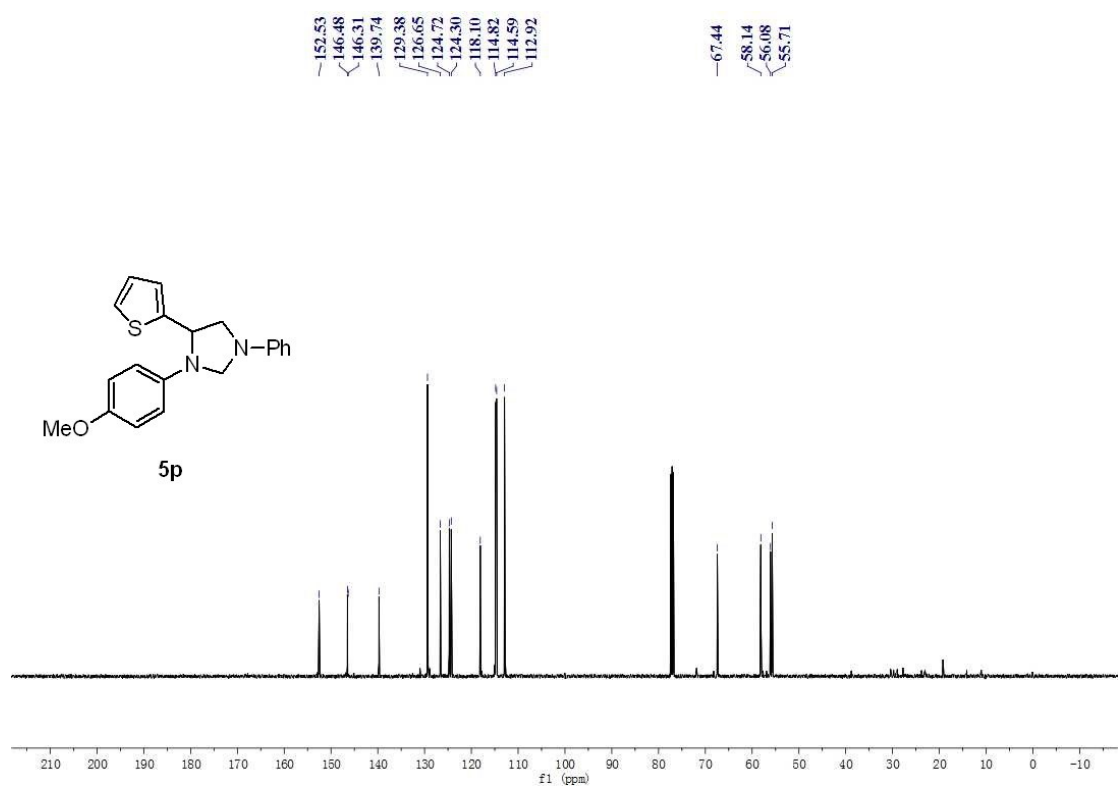

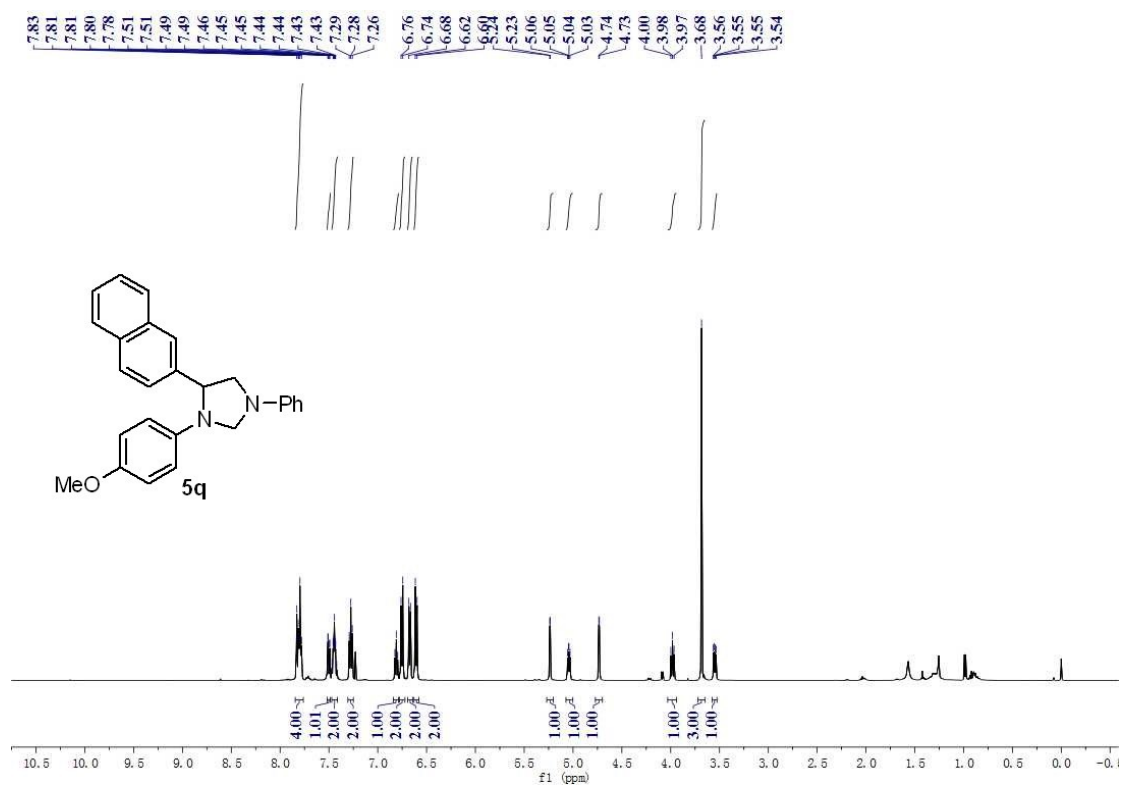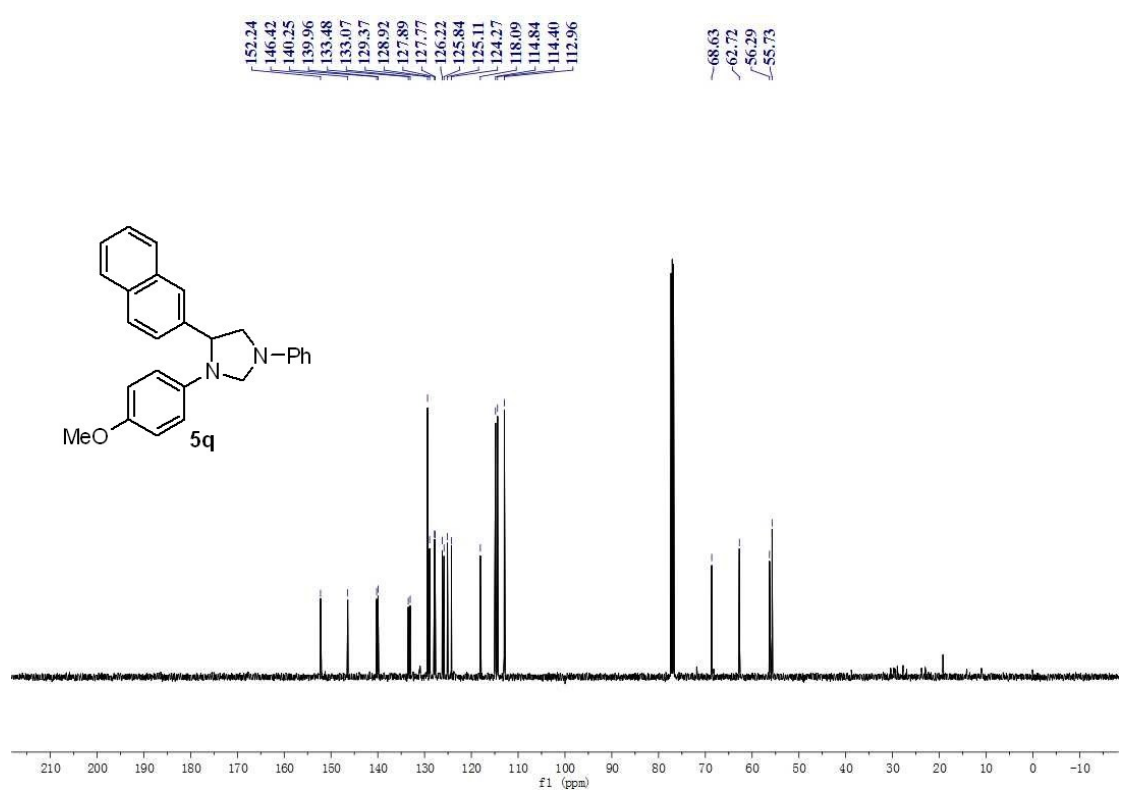

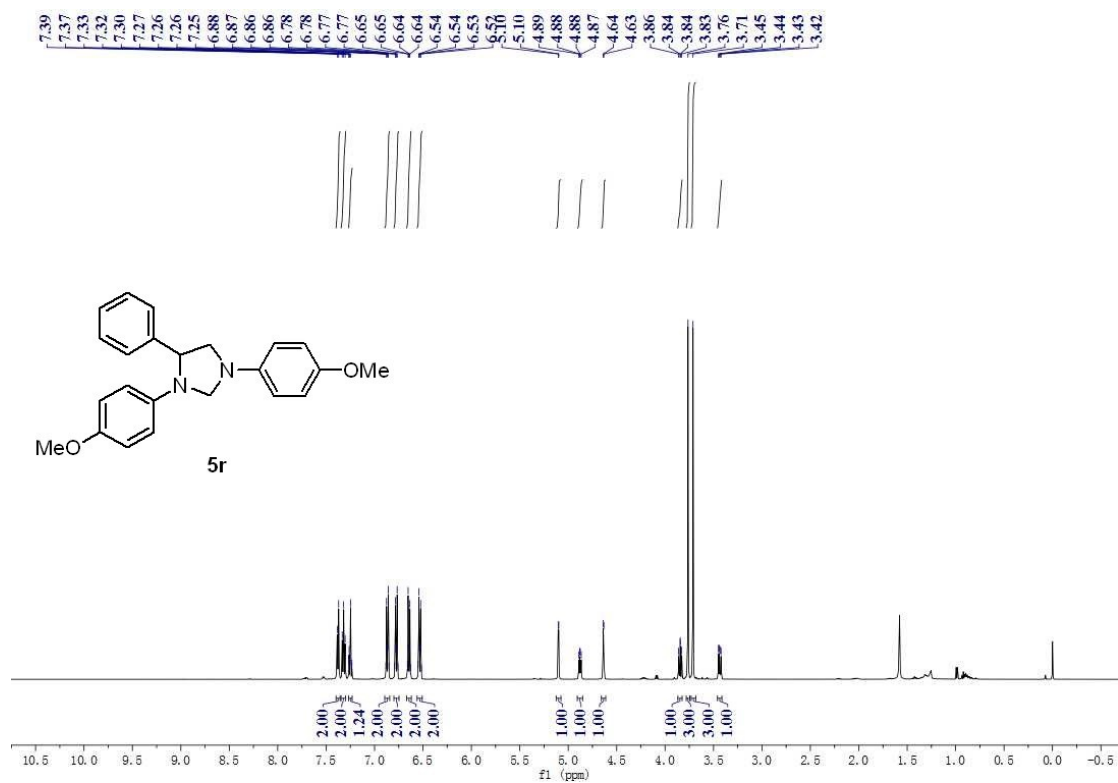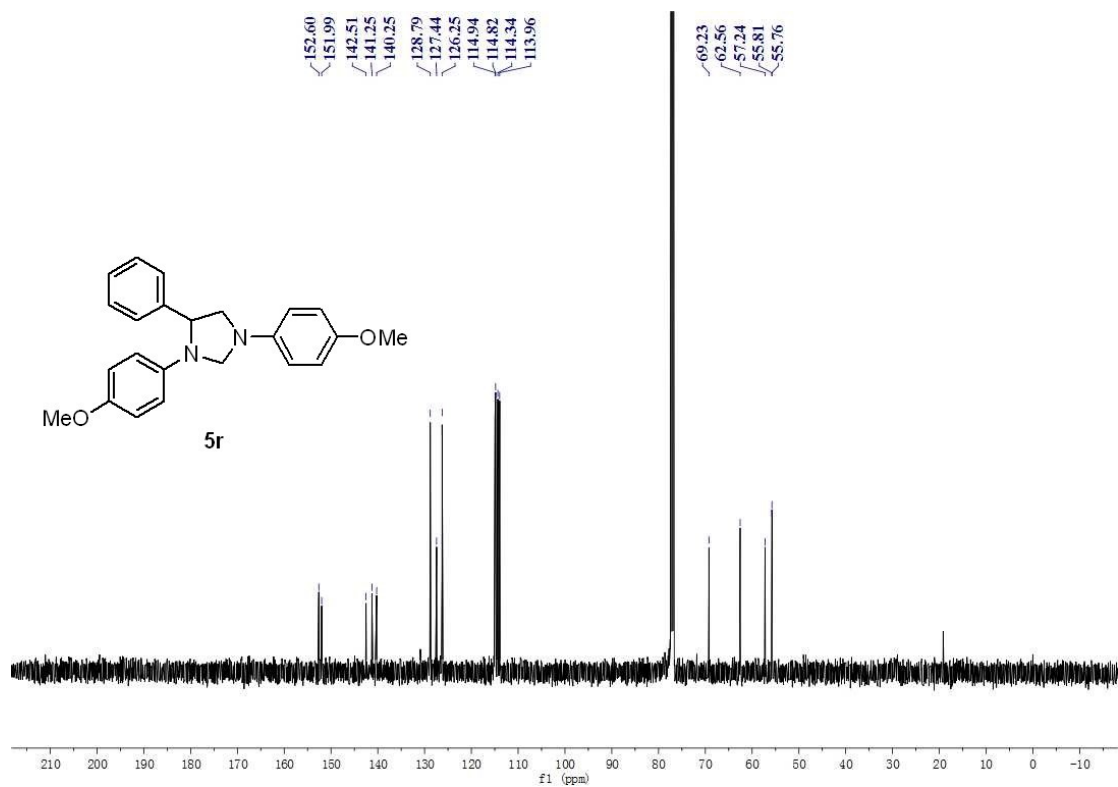

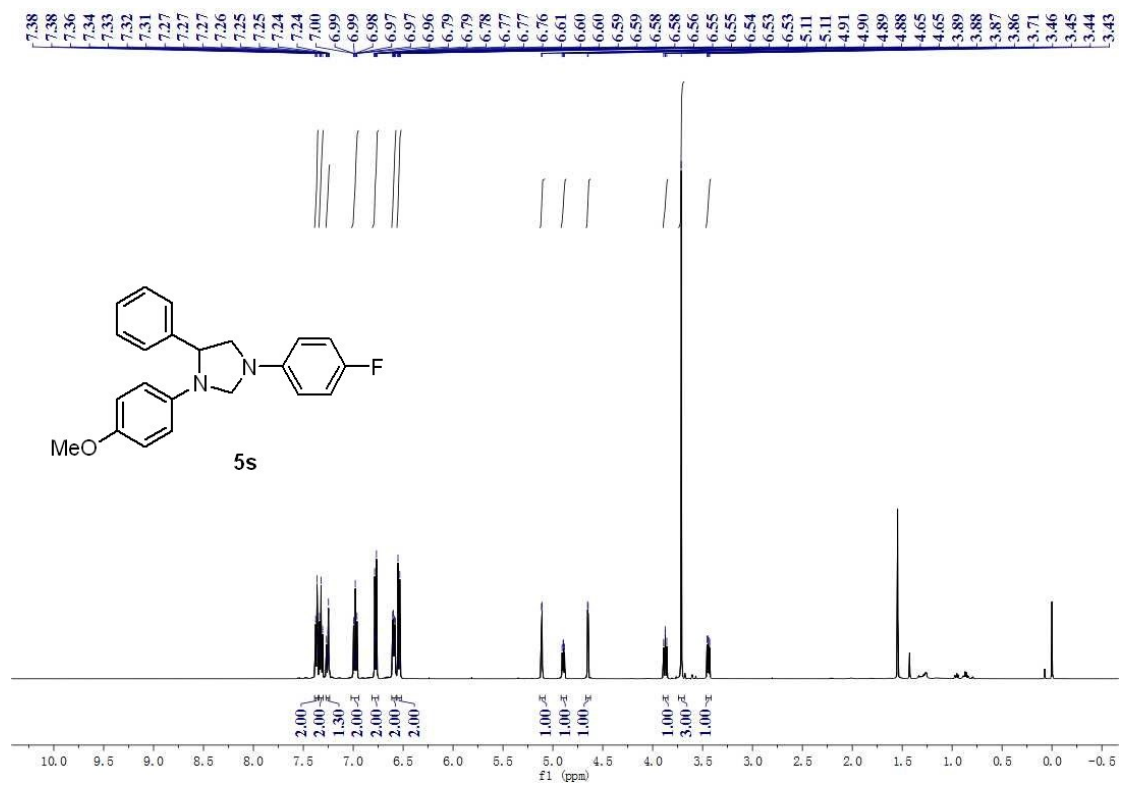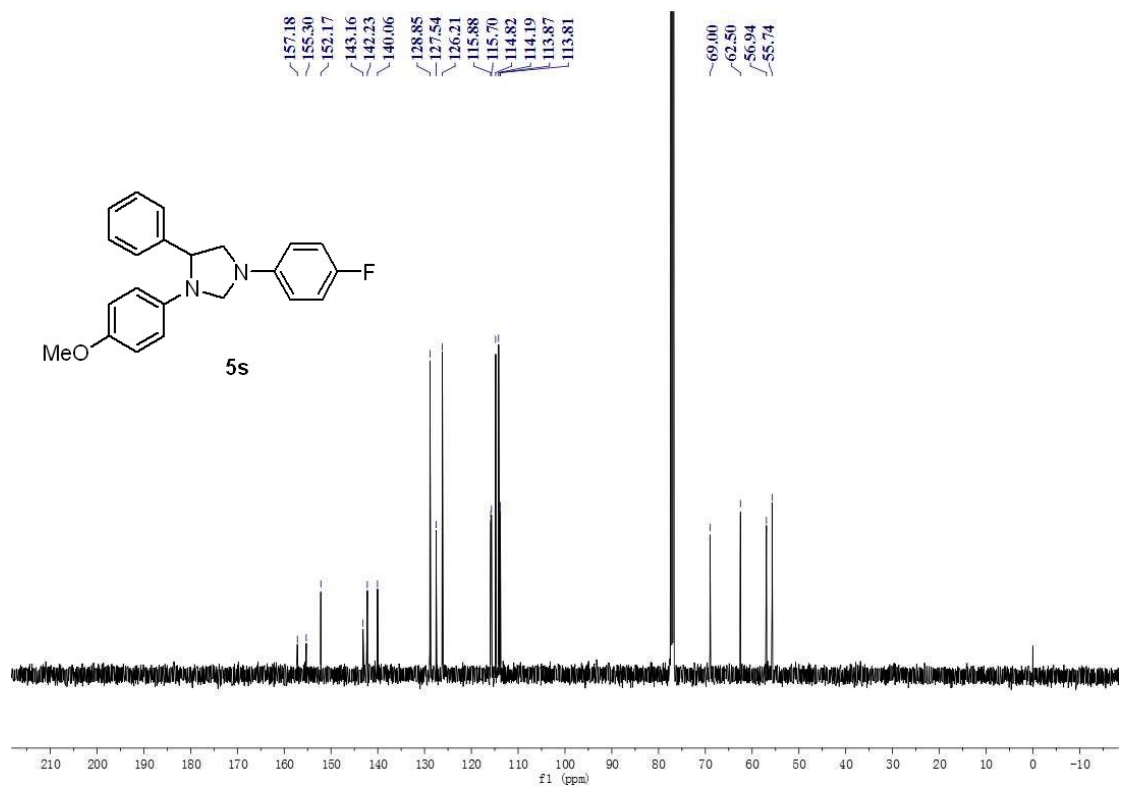

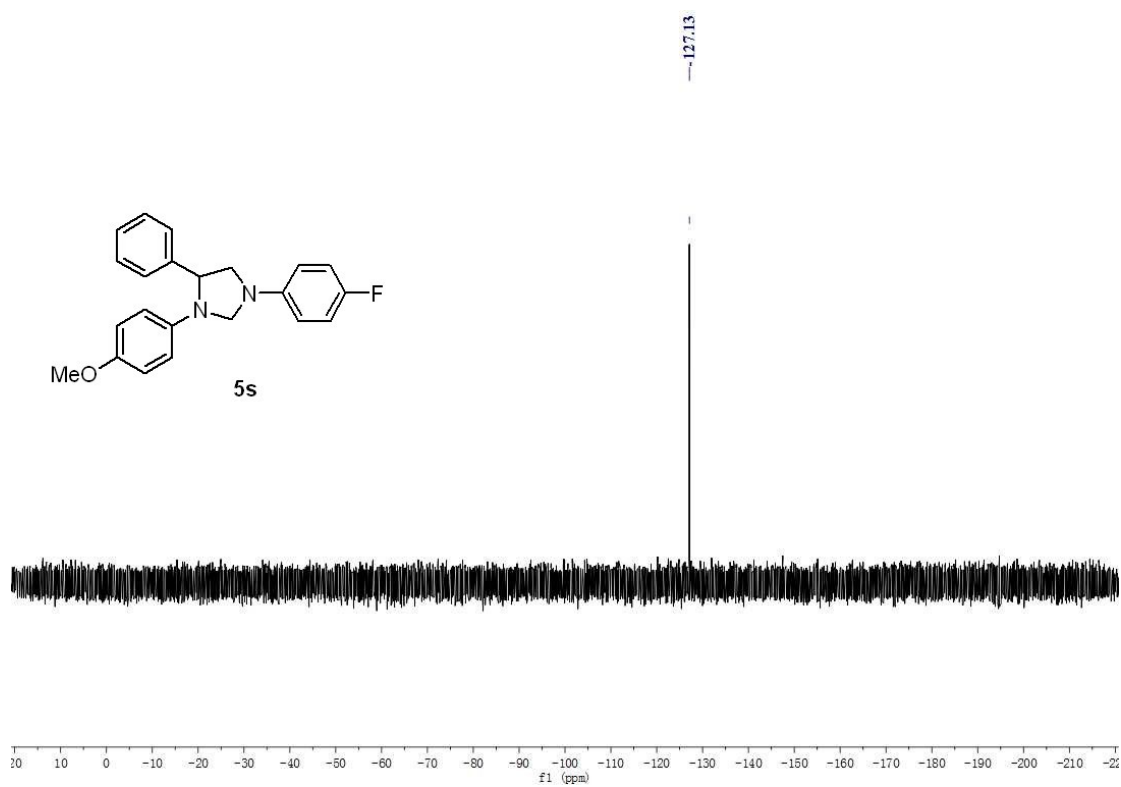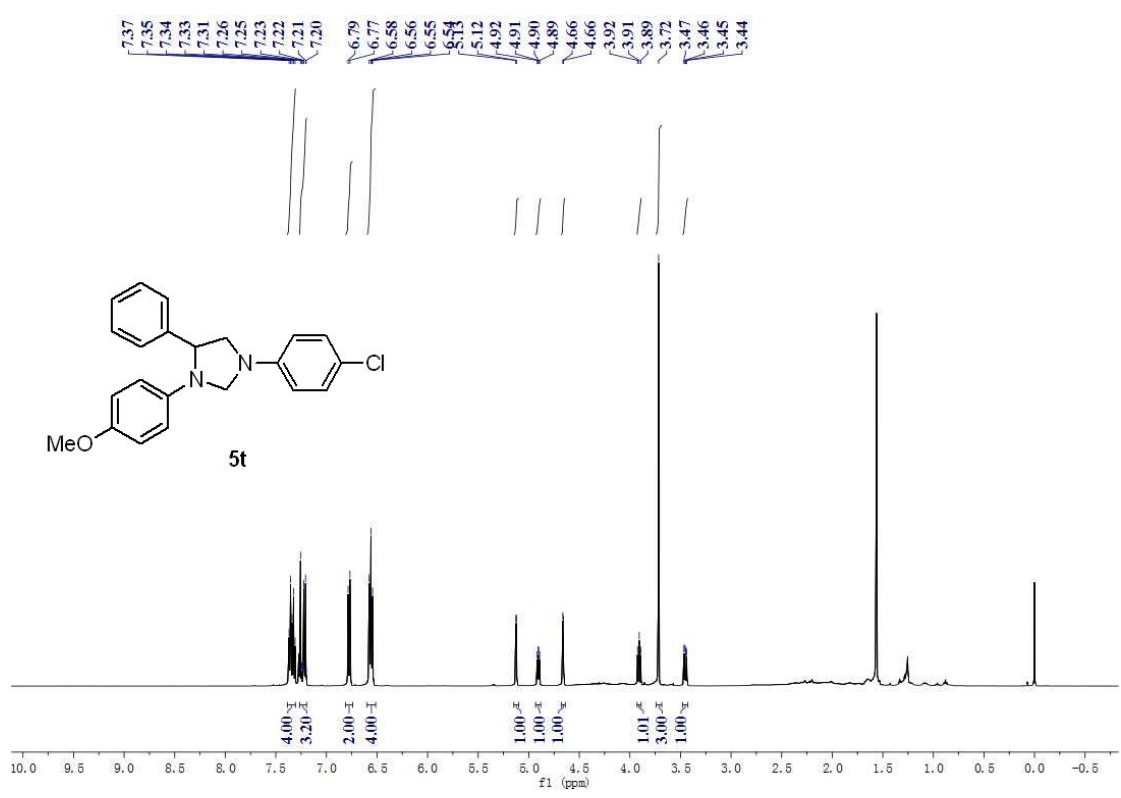

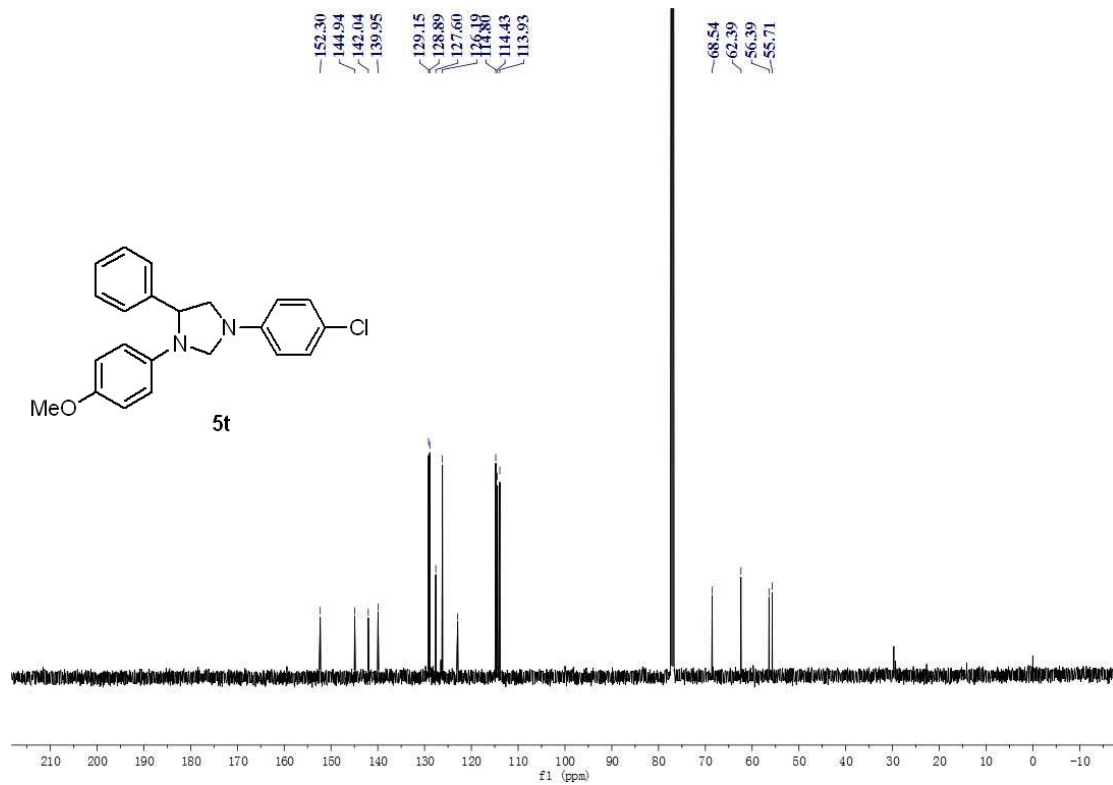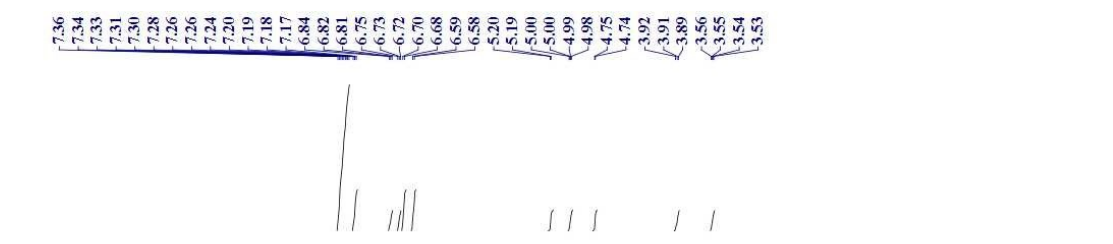

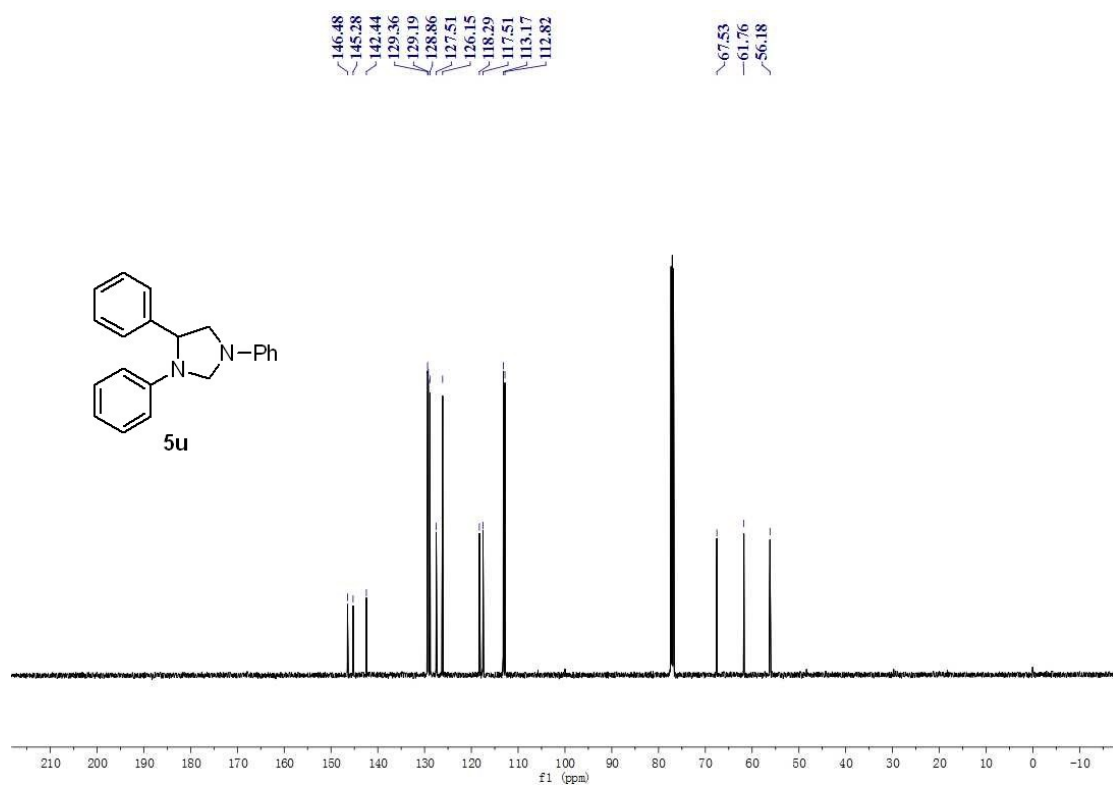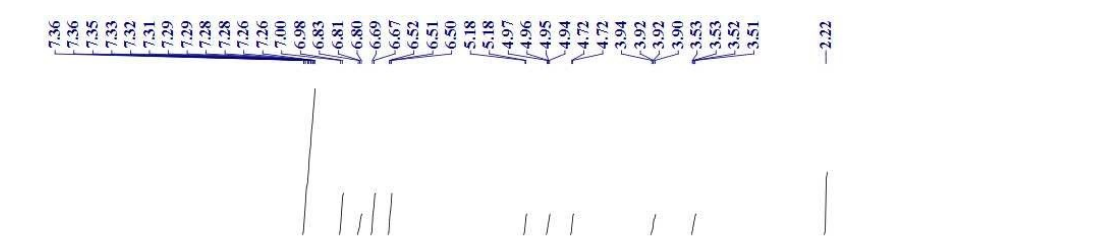



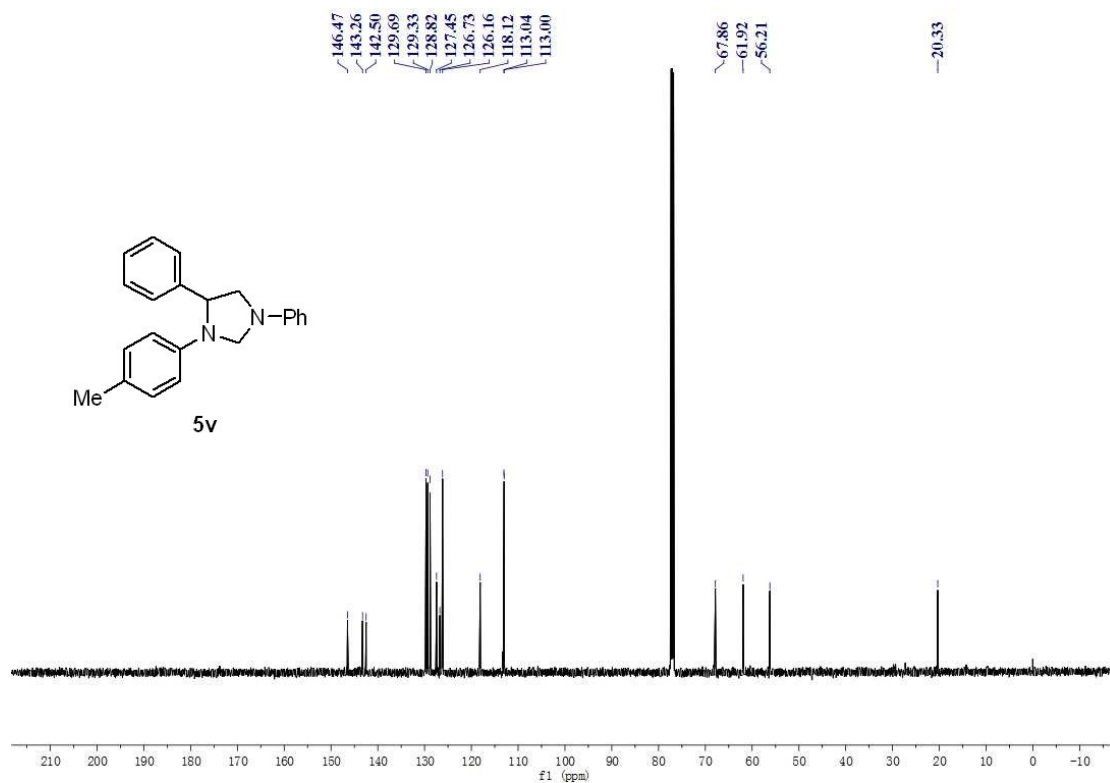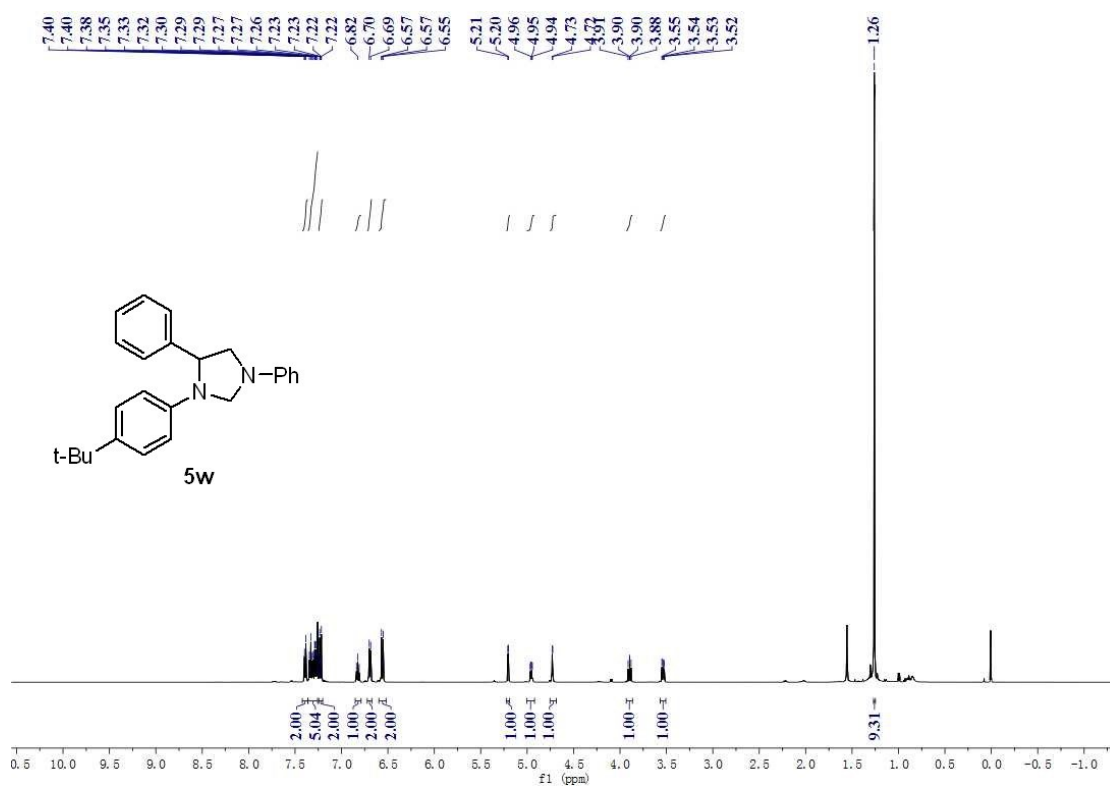

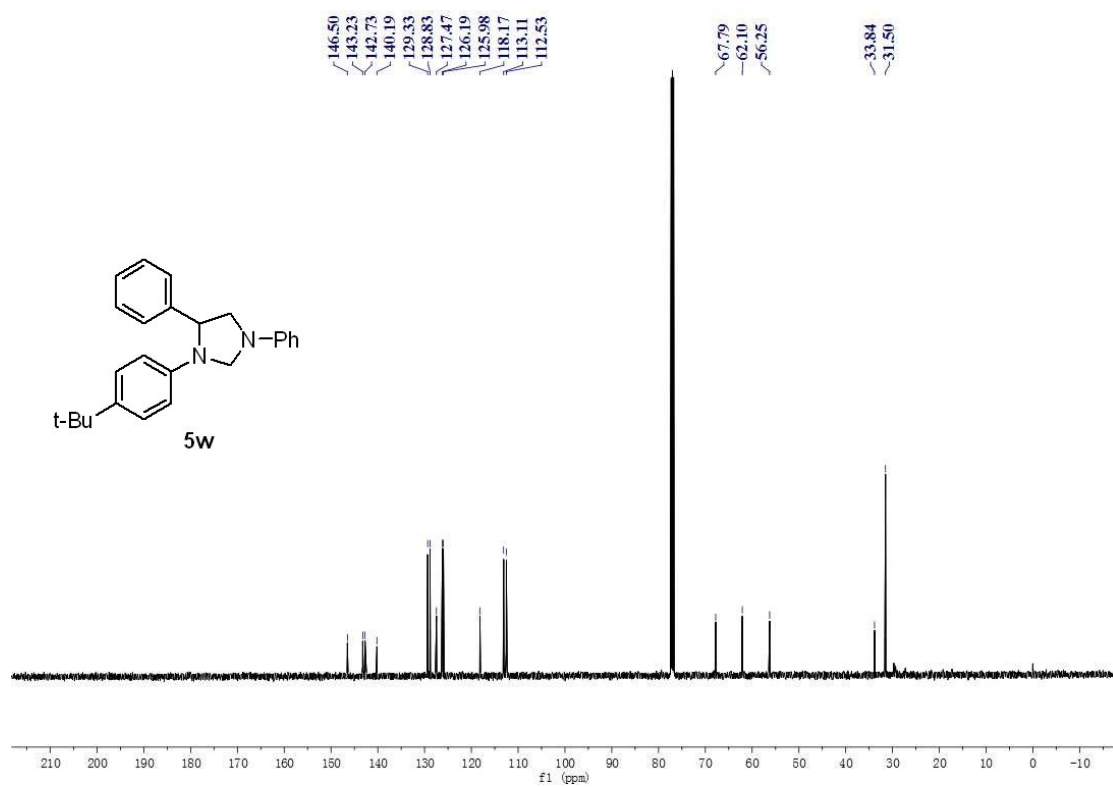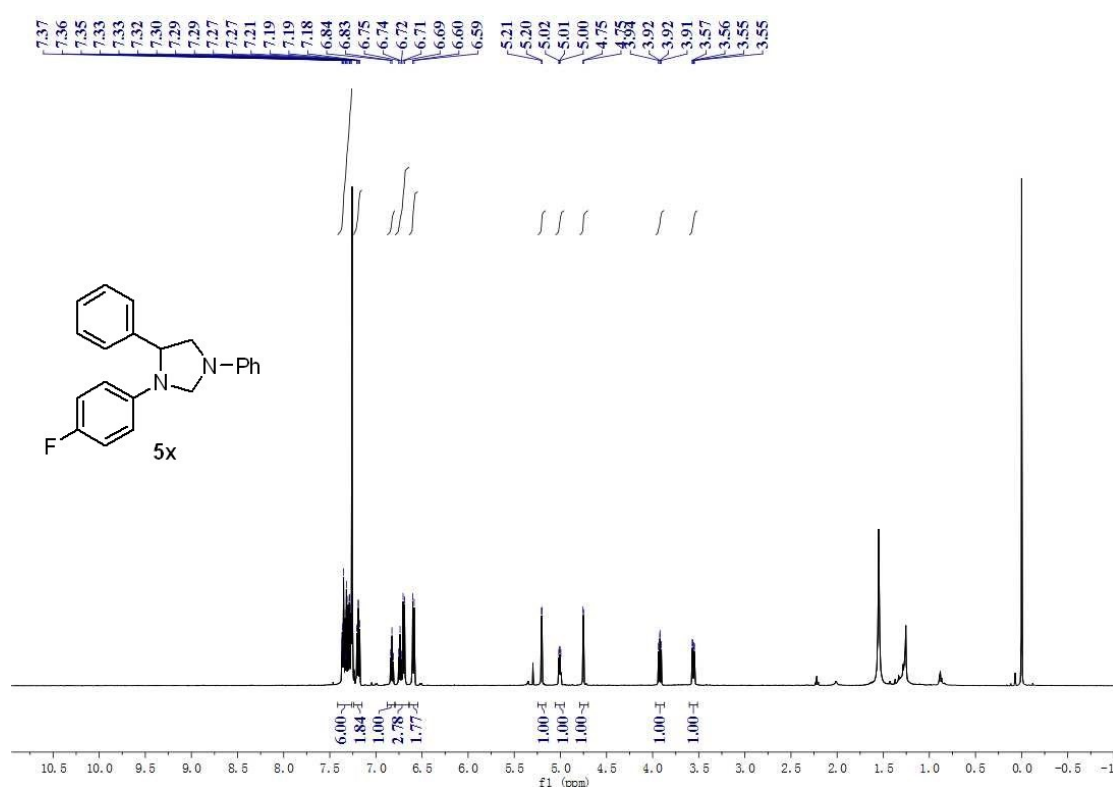

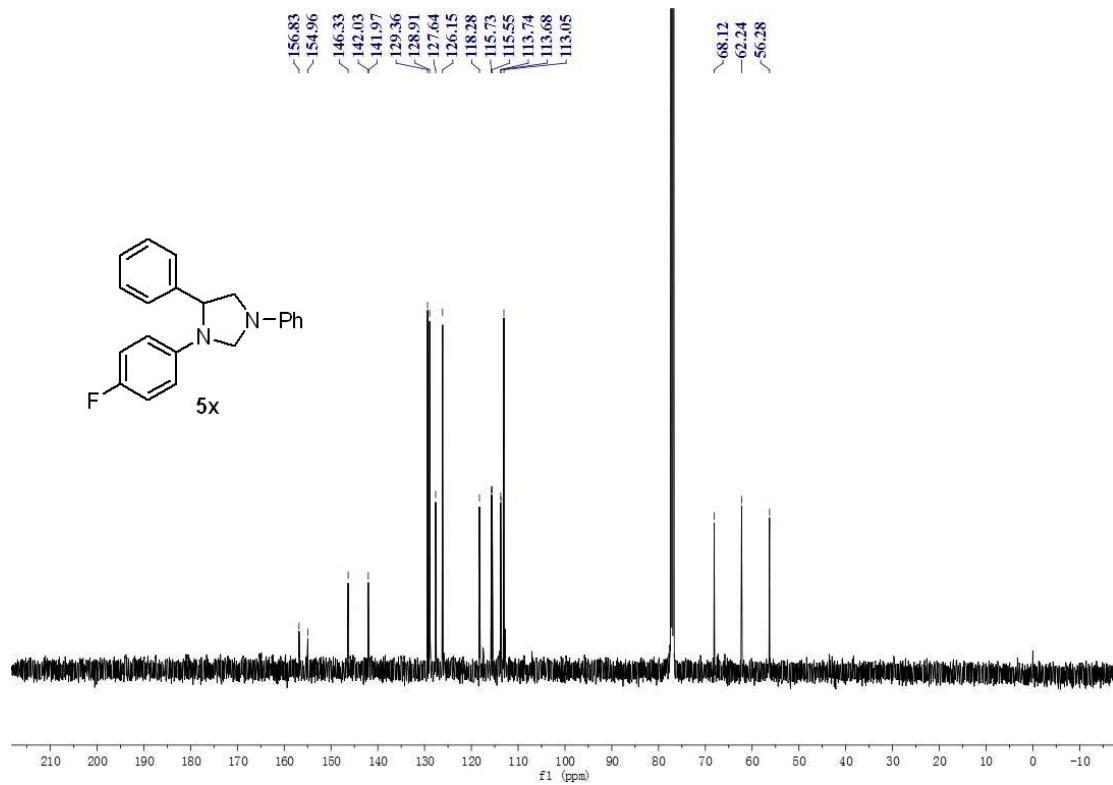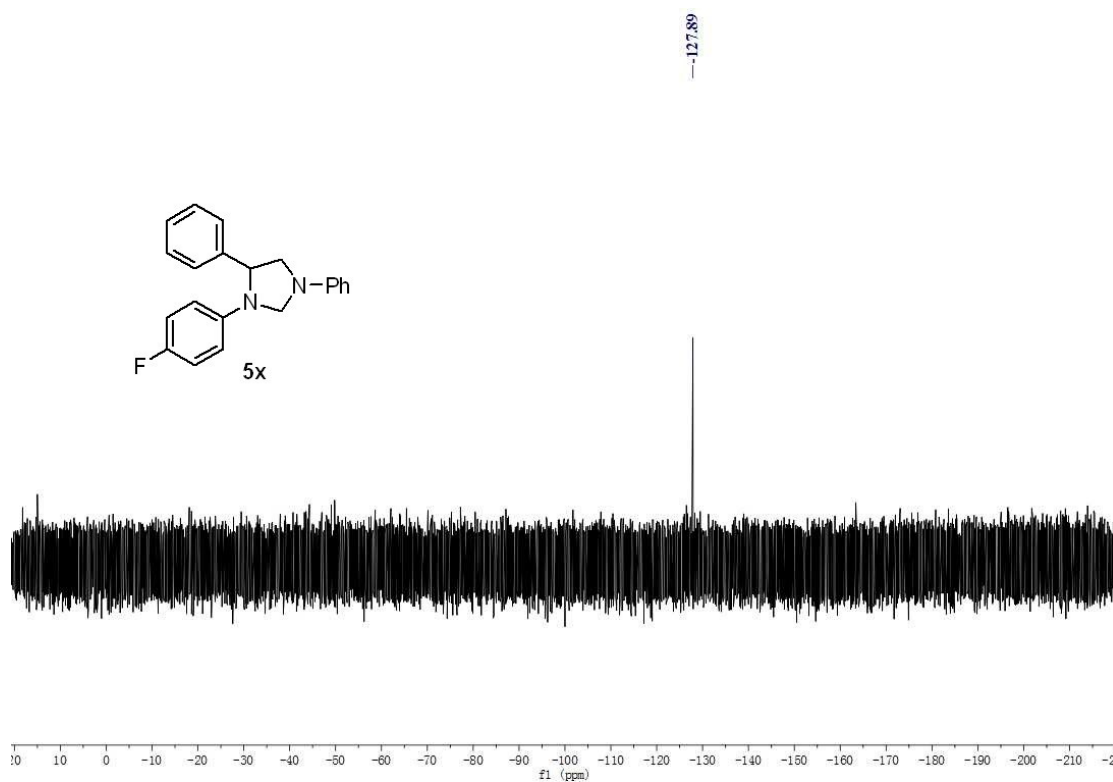

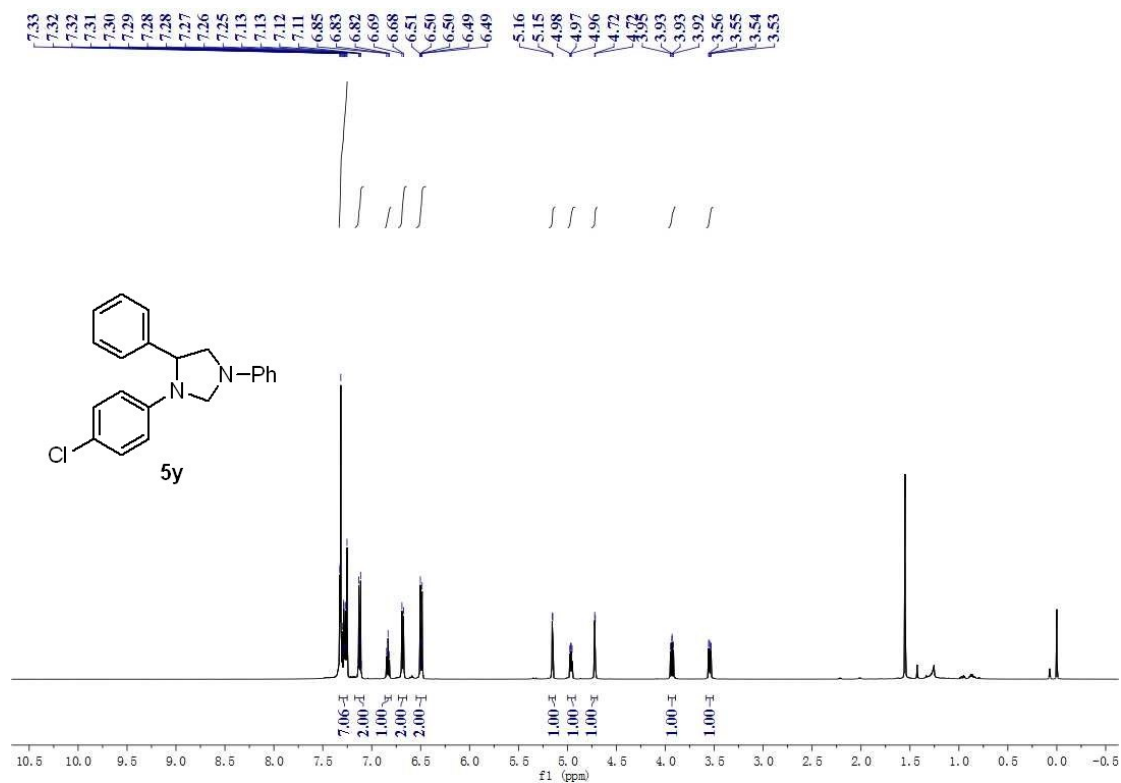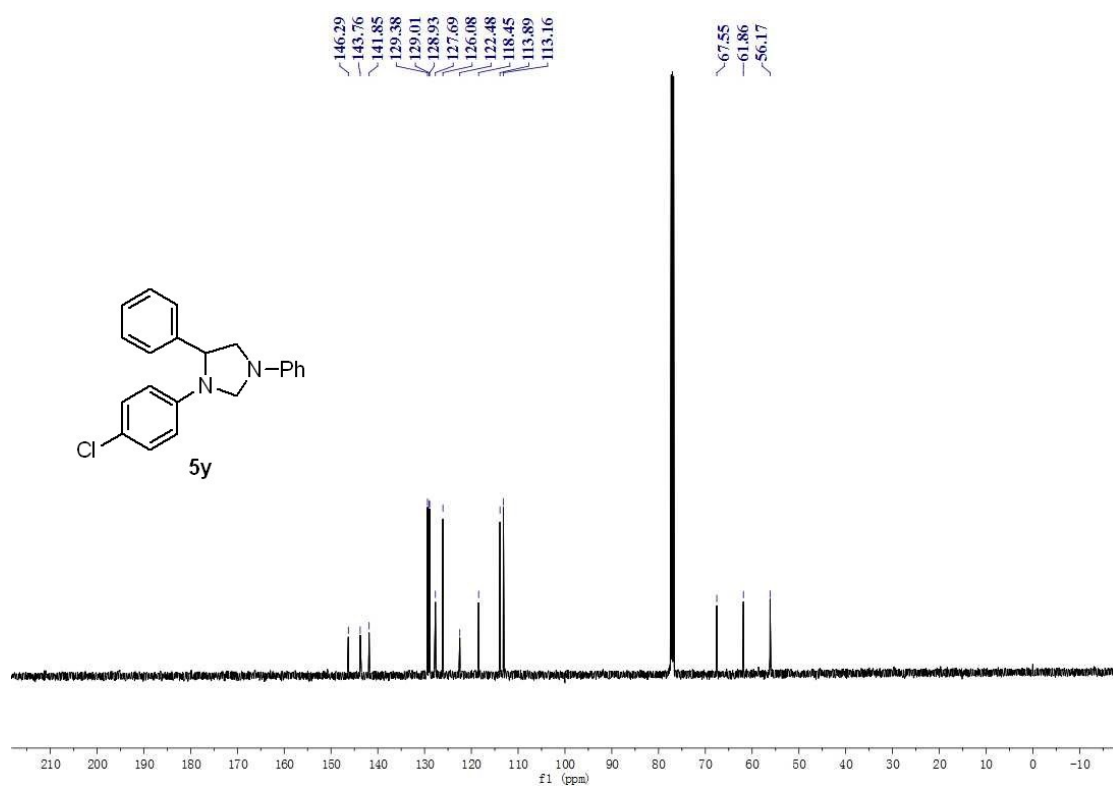

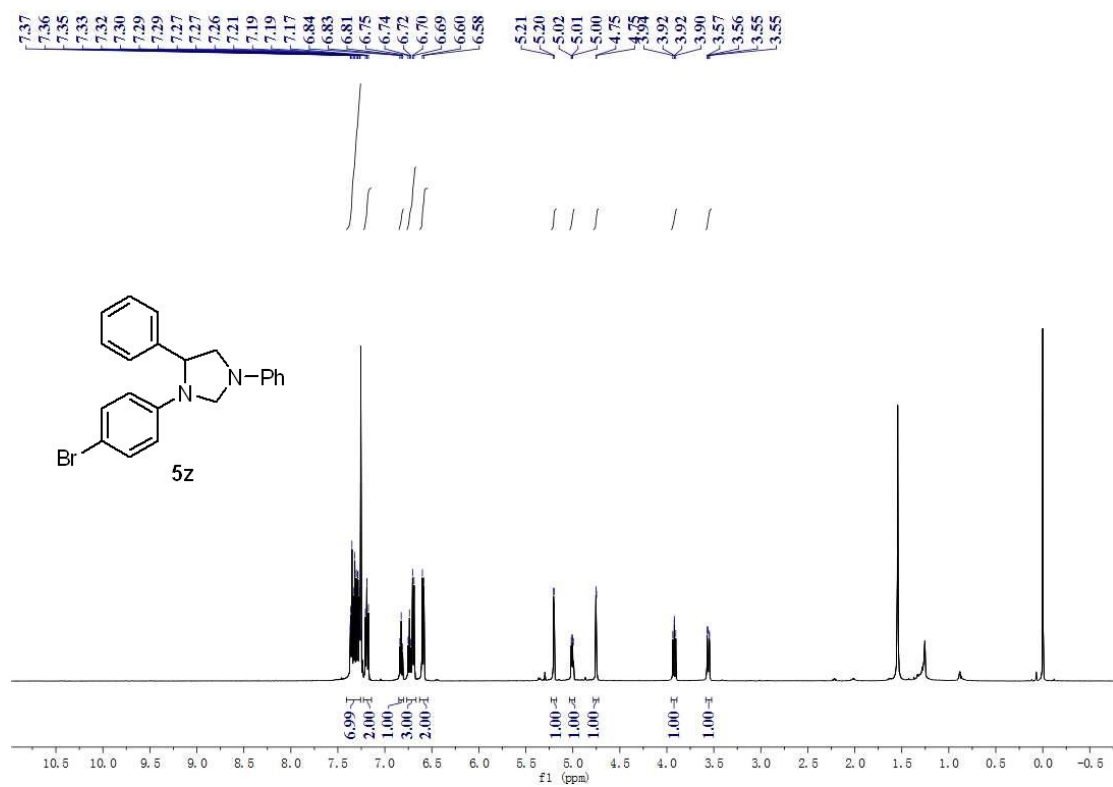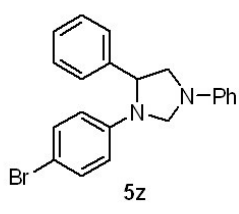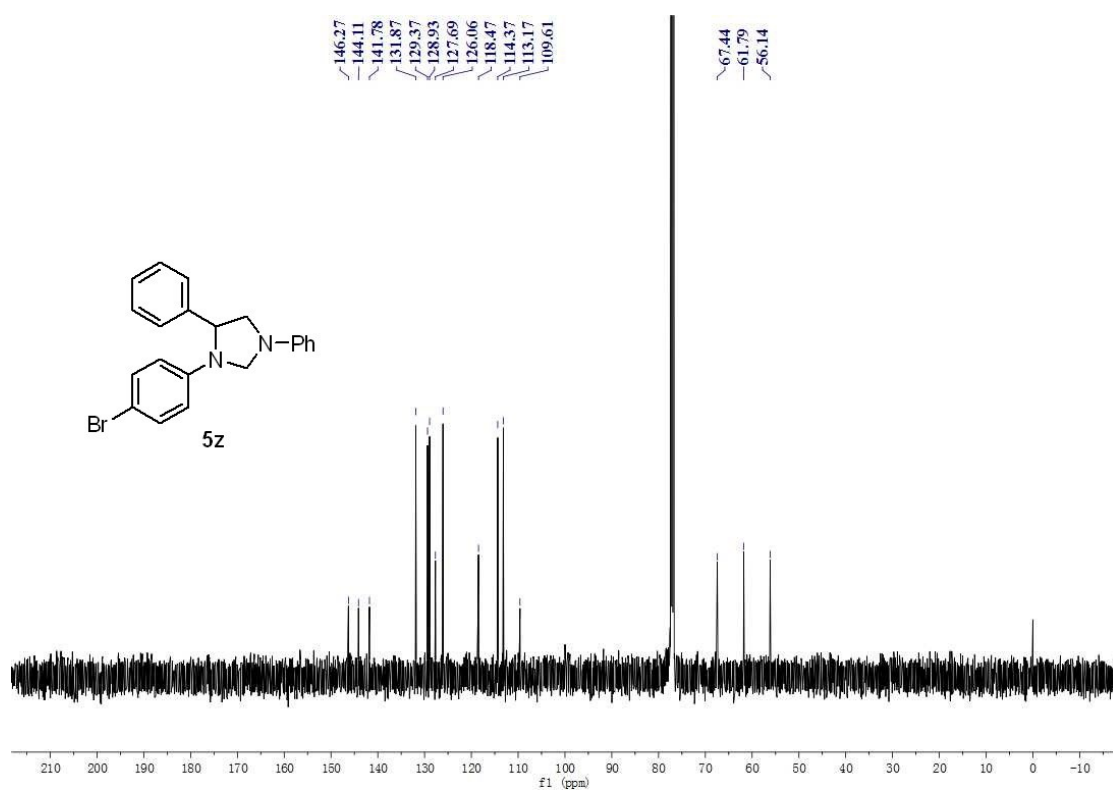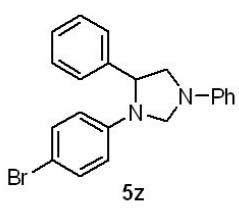

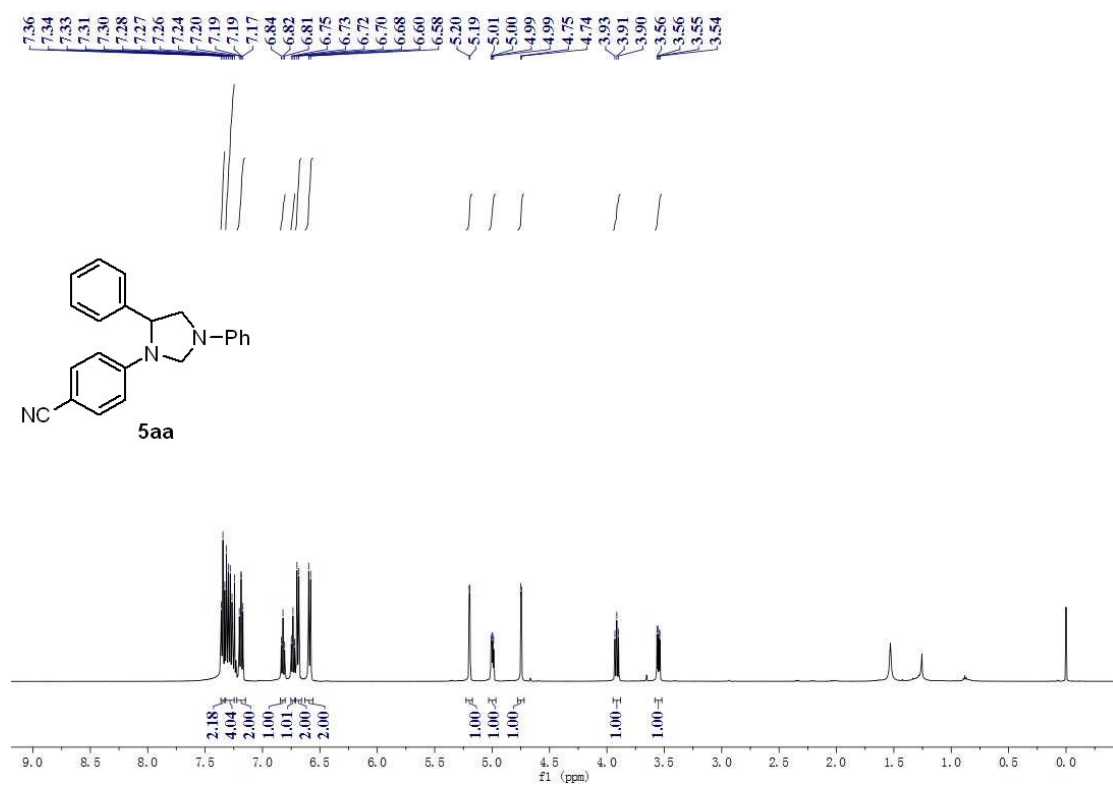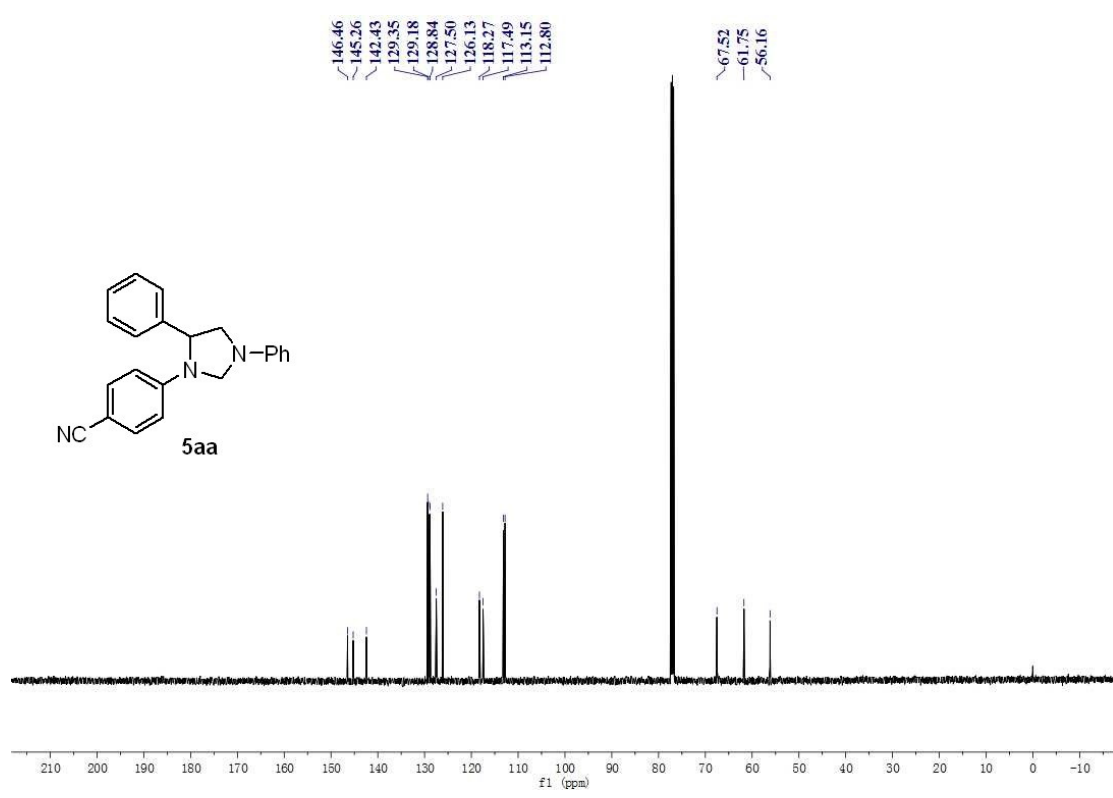

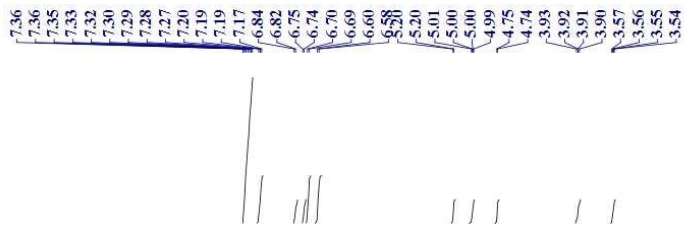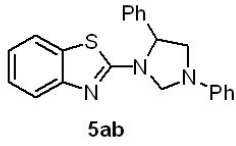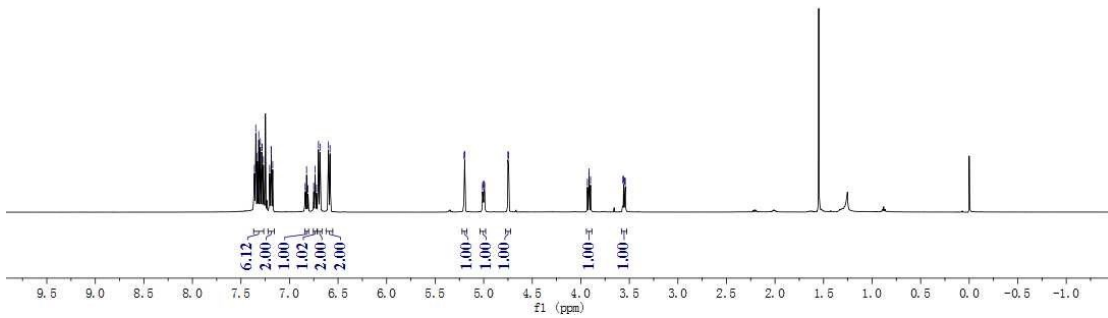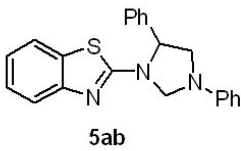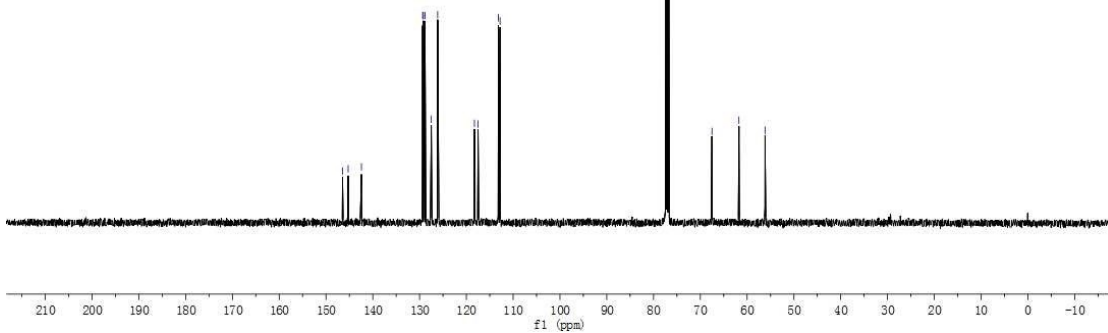

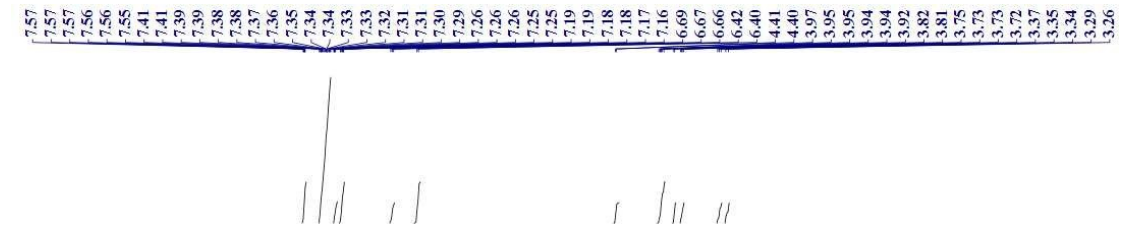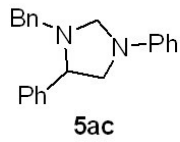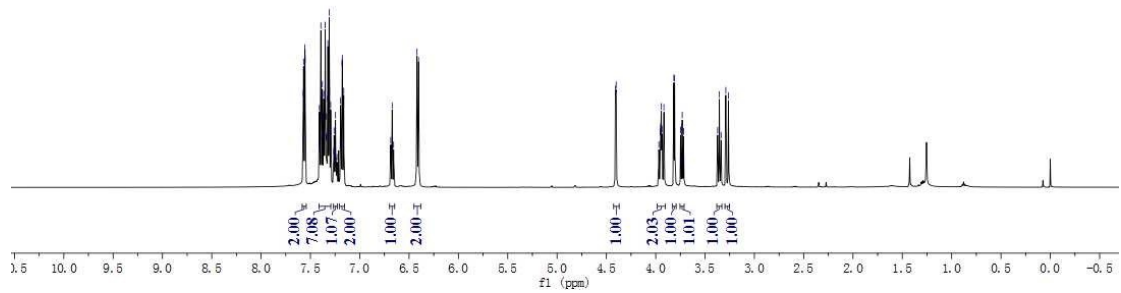

146.24  
139.55  
138.62  
129.22  
128.77  
128.42  
128.36  
128.11  
127.96  
127.23  
116.41  
111.38

70.54  
68.09

56.28  
55.70

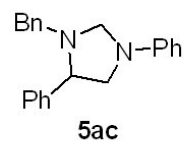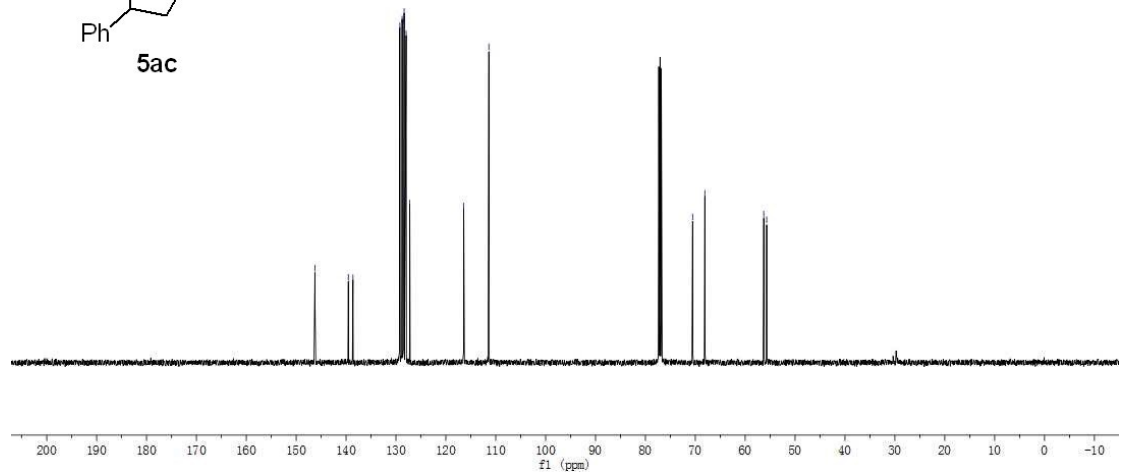



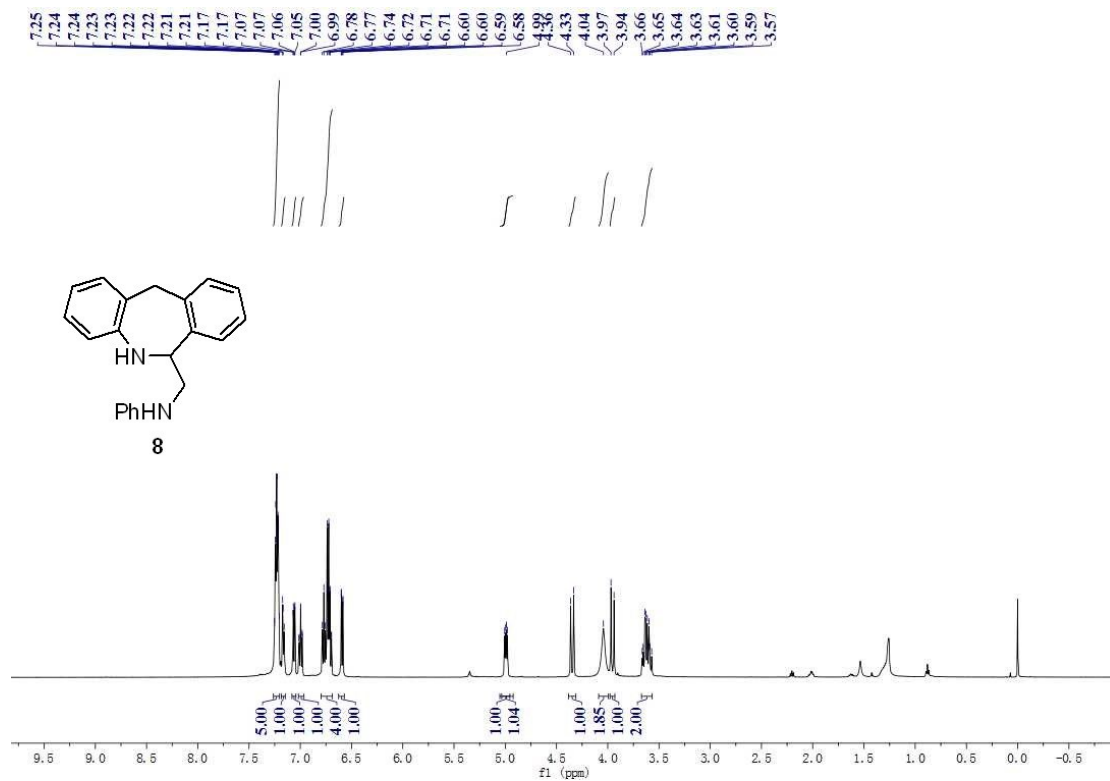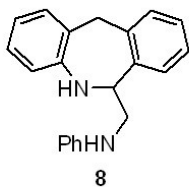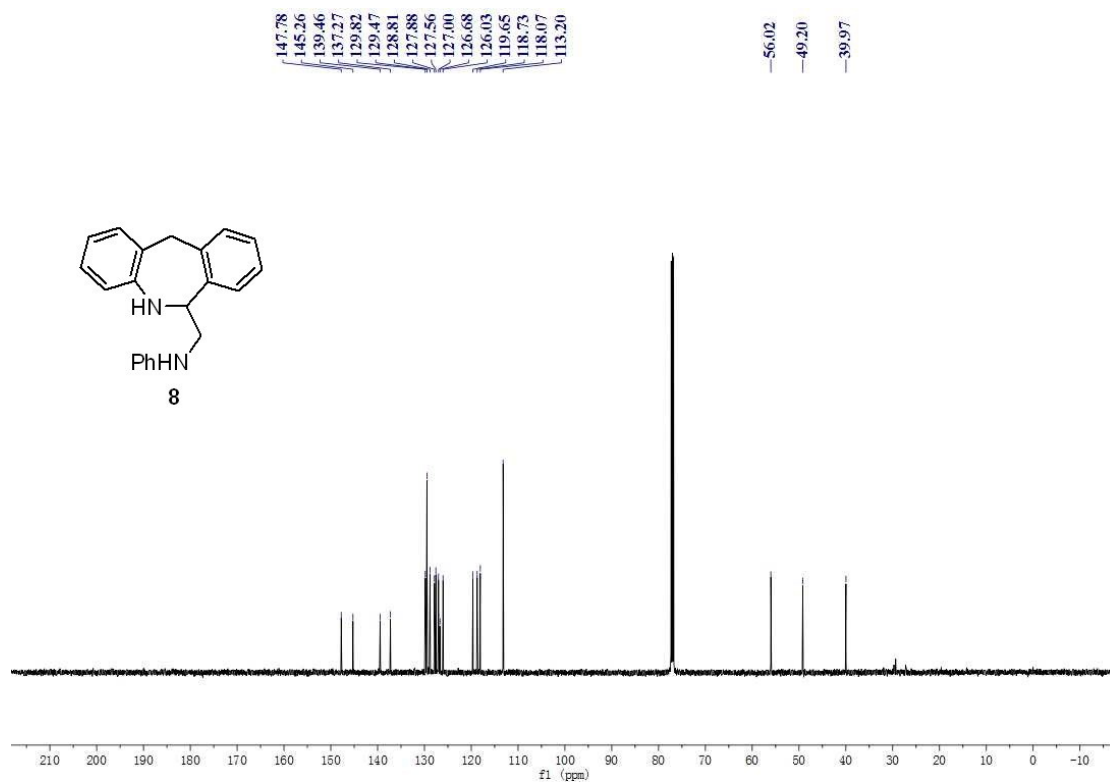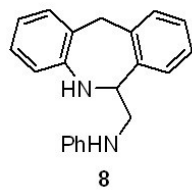

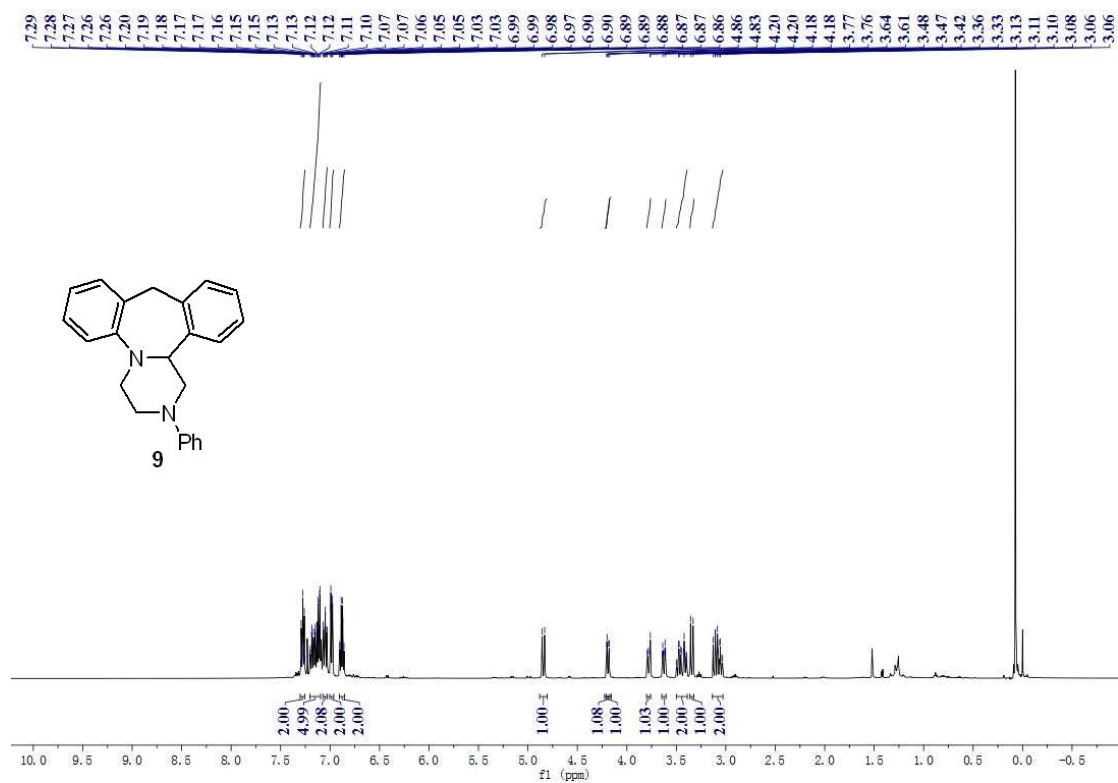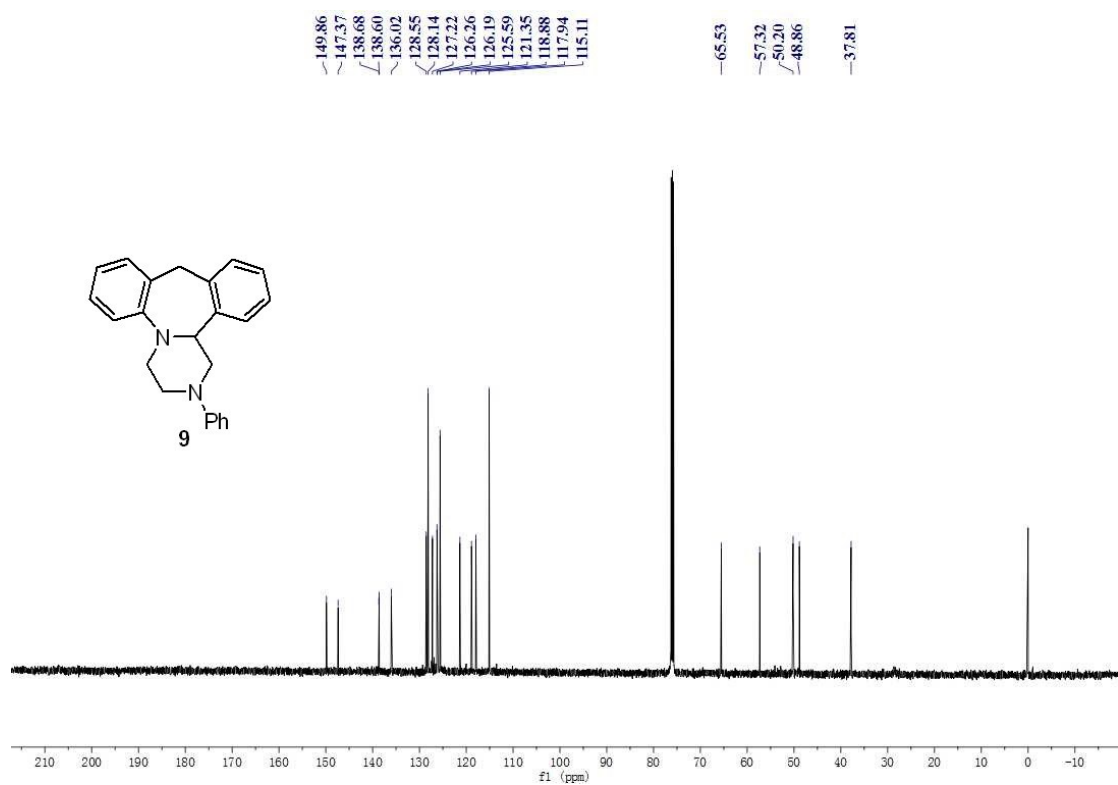

Supplement: d0qo01028f1.pdf [file d0qo01028f1.pdf]
